# Supplementary material for: Proteomics Analysis of the Zebrafish Skeletal Extracellular Matrix
Source: PLoS One. 2014 Mar 7;9(3):e90568. doi: 10.1371/journal.pone.0090568 (PMC3946537; doi:10.1371/journal.pone.0090568)
Supplement: File S1 — includes the following: Table S1. Original protein groups table as obtained from the MaxQuant software. Table S2. Original peptides table as obtained from the MaxQuant software. Table S3. Identified Extracellular proteins. GO annotations obtained by STRAP analysis on zebrafish proteins and human orthologue proteins. Table S4. Cellular proteins and proteins without GO annotations. Table S5. Differential protein abundance. Table S6. In situ hybridization primer sequences of genes from the selected proteins. (XLSX) [file pone.0090568.s002.xlsx]

## Sheet: Supplemental Table S1
Supplemental Table S1. Original "protein groups" table as obtained from the MaxQuant software
id	Protein IDs	Protein Descriptions		Peptides	Unique Peptides	Peptides MK77_14dpf_H1	Peptides MK78_14dpf_H2	Peptides MK79_14dpf_H3	Peptides MK80_14dpf_V1	Peptides MK81_14dpf_V2	Peptides MK82_14dpf_V3	Peptides MK83_28dpf_H1	Peptides MK84_28dpf_H2	Peptides MK85_28dpf_H3	Peptides MK86_28dpf_V1	Peptides MK87_28dpf_V2	Peptides MK88_28dpf_V3	Peptides MK89_28dpf_F1	Peptides MK90_28dpf_F2	Peptides MK91_358dpf_H1	Peptides MK92_358dpf_H2	Peptides MK93_358dpf_H3	Peptides MK94_358dpf_V1	Peptides MK95_358dpf_V2	Peptides MK96_358dpf_V3	Peptides MK97_358dpf_F1	Peptides MK98_358dpf_F2	Peptides MK99_358dpf_F3	Only identified by site	Reverse	Contaminant	LFQ Intensity MK77_14dpf_H1	LFQ Intensity MK78_14dpf_H2	LFQ Intensity MK79_14dpf_H3	LFQ Intensity MK80_14dpf_V1	LFQ Intensity MK81_14dpf_V2	LFQ Intensity MK82_14dpf_V3	LFQ Intensity MK83_28dpf_H1	LFQ Intensity MK84_28dpf_H2	LFQ Intensity MK85_28dpf_H3	LFQ Intensity MK86_28dpf_V1	LFQ Intensity MK87_28dpf_V2	LFQ Intensity MK88_28dpf_V3	LFQ Intensity MK89_28dpf_F1	LFQ Intensity MK90_28dpf_F2	LFQ Intensity MK91_358dpf_H1	LFQ Intensity MK92_358dpf_H2	LFQ Intensity MK93_358dpf_H3	LFQ Intensity MK94_358dpf_V1
262	B8A561;F1Q4R7;E7EZ32;E7FAD0;F1QT80	>tr|B8A561|B8A561_DANRE Novel myosin family protein OS=Danio rerio GN=myhz1.2 PE=4 SV=1;>tr|F1Q4R7|F1Q4R7_DANRE Uncharacterized protein OS=Danio rerio GN=OTTDARG00000023360 PE=4 SV=1		156	0	61	41	54	135	140	127	124	135	139	120	133	137	105	106	75	92	104	61	73	71	67	52	50				25826000	26644000	32573000	314460000	376840000	332960000	354360000	629120000	861220000	345800000	518120000	709670000	154720000	119330000	244070000	307610000	585110000	47615000
264	B8A568;E7F7B9	>tr|B8A568|B8A568_DANRE Novel myosin family protein OS=Danio rerio GN=myhz1.1 PE=4 SV=1		155	1	61	41	54	134	139	126	123	134	138	119	132	136	105	107	73	90	102	59	71	69	65	51	50				0	0	0	0	0	0	0	0	0	0	0	0	0	201850	0	0	0	0
265	B8A569;F1R174;F1QNV2	>tr|B8A569|B8A569_DANRE Novel myosin family protein OS=Danio rerio GN=myhz1.3 PE=4 SV=1		154	0	60	41	53	130	135	125	122	131	136	120	131	135	105	105	77	93	106	63	75	73	68	52	52				5953400	3956100	1340600	13194000	13744000	6073300	2108800	8721300	5742100	3861000	8083200	10219000	2132300	3109500	7951000	15522000	4843500	2811500
1395	Q6IQX1;F1QKP3;E7F5W6	>tr|Q6IQX1|Q6IQX1_DANRE Myosin, heavy polypeptide 2, fast muscle specific OS=Danio rerio GN=myhz2 PE=2 SV=1		152	3	58	37	54	125	128	120	119	129	133	117	129	133	102	106	79	93	109	62	75	70	65	54	52				966950	0	532240	3315000	6332400	2813400	5780600	16403000	22860000	10802000	28806000	28064000	6369400	6034400	8590900	13083000	12704000	1636300
27	A2BGX6;F1Q5K4;E7F668;F1QT59;E7F828;F1QAF1	>tr|A2BGX6|A2BGX6_DANRE Myosin heavy chain 4 OS=Danio rerio GN=myhc4 PE=4 SV=1;>tr|F1Q5K4|F1Q5K4_DANRE Uncharacterized protein OS=Danio rerio GN=myhc4 PE=4 SV=1		151	4	55	38	53	121	126	115	118	127	131	112	127	127	99	102	82	103	115	68	82	75	71	57	54				0	0	0	0	0	0	0	562020	865580	0	194990	440130	0	0	0	553400	4240600	113270
1136	F1RBV5	>tr|F1RBV5|F1RBV5_DANRE Uncharacterized protein (Fragment) OS=Danio rerio GN=wu:fd14a01 PE=4 SV=1		129	3	47	31	41	88	95	82	103	112	109	80	91	91	78	83	69	92	104	52	64	62	65	53	55				864600	882080	839360	777660	808800	947790	32159000	62628000	60840000	863710	1604900	1966000	2119200	2828300	32799000	34800000	42498000	4137100
967	F1QVX3	>tr|F1QVX3|F1QVX3_DANRE Uncharacterized protein OS=Danio rerio GN=myhb PE=4 SV=1		122	30	40	26	34	73	77	62	103	107	107	56	64	68	58	58	73	84	98	35	44	45	47	45	39				539620	172750	414810	1183500	1815200	1332200	19256000	92929000	64482000	420620	2349000	639300	287290	238640	10171000	13280000	68627000	201640
1071	F1R6C7	>tr|F1R6C7|F1R6C7_DANRE Uncharacterized protein (Fragment) OS=Danio rerio GN=si:ch211-158m24.10 PE=4 SV=1		112	0	39	25	34	91	98	88	95	97	103	90	100	100	75	81	57	72	86	46	60	54	53	41	42				0	0	0	0	0	0	0	0	0	0	0	0	0	0	0	0	195390	0
218	B3DFS9;E7FCI8;E9QEW5	>tr|B3DFS9|B3DFS9_DANRE Myosin, heavy polypeptide 11, smooth muscle OS=Danio rerio GN=myh11 PE=2 SV=1		109	94	8	8	8	100	104	90	24	22	19	6	6	7	6	6	5	8	4	6	6	10	11	3	4				38596000	58361000	19291000	304570000	470720000	301190000	22336000	35354000	8502200	24047000	1582700	906080	31212000	21022000	3562900	334040	821480	4254000
503	E7FBD3	>tr|E7FBD3|E7FBD3_DANRE Uncharacterized protein OS=Danio rerio GN=apob PE=4 SV=1		104	104	50	37	50	66	64	62	34	46	39	14	15	26	79	79	25	48	54	1	6	2	84	72	94				13897000	16214000	18859000	19179000	18108000	13972000	3188500	6391600	5613400	624940	1560600	1832000	36564000	38251000	3406100	5384400	7100700	0
1311	Q5TZ29;F1QQ87	>tr|Q5TZ29|Q5TZ29_DANRE Novel protein similar to vertebrate apolipoprotein B (Including Ag(X) antigen) (APOB) OS=Danio rerio GN=apobl PE=2 SV=1;>tr|F1QQ87|F1QQ87_DANRE Uncharacterized protein OS=Danio rerio GN=apobl PE=4 SV=1		104	104	91	83	88	91	93	90	82	92	82	60	71	78	80	76	48	51	37	21	32	21	45	51	31				70694000	64890000	72720000	79162000	104690000	69310000	31877000	67389000	64776000	12053000	19753000	28124000	40632000	39646000	23466000	26030000	10734000	4330300
709	F1QAQ4;F1Q9G9;E7F5L1	>tr|F1QAQ4|F1QAQ4_DANRE Uncharacterized protein (Fragment) OS=Danio rerio GN=zgc:66156 PE=4 SV=1		102	2	34	22	28	72	74	69	84	91	88	60	69	68	60	64	56	74	83	39	48	49	50	41	40				0	0	0	0	0	0	715740	841130	766880	0	0	0	0	0	0	379240	821380	0
628	F1Q4X1	>tr|F1Q4X1|F1Q4X1_DANRE Uncharacterized protein OS=Danio rerio GN=col6a3 PE=4 SV=1		99	36	47	42	49	55	54	52	64	65	54	53	53	61	69	66	67	86	75	73	85	78	80	82	75				76895000	73237000	69946000	158310000	140270000	172350000	124460000	123950000	107130000	29227000	39640000	47207000	132100000	139550000	411960000	433500000	206550000	202700000
1089	F1R7N8;B0S758	>tr|F1R7N8|F1R7N8_DANRE Uncharacterized protein OS=Danio rerio GN=ttna PE=4 SV=1		88	2	20	22	20	68	75	71	14	37	35	39	54	63	19	22	23	49	17	3	9	2	17	10	4				9099100	5784300	4703600	12004000	22819000	10203000	2525100	4223200	7067000	3946400	8647900	11128000	2443600	2054400	4536700	8535600	1473900	1584400
1001	F1QZQ0;F1QVM7	>tr|F1QZQ0|F1QZQ0_DANRE Uncharacterized protein (Fragment) OS=Danio rerio GN=ttna PE=4 SV=1;>tr|F1QVM7|F1QVM7_DANRE Uncharacterized protein (Fragment) OS=Danio rerio GN=ttna PE=4 SV=1		87	1	20	22	19	67	74	70	14	36	34	39	55	63	20	22	22	49	17	3	9	2	17	9	4				0	0	0	0	0	0	0	0	0	0	33443	0	0	0	0	0	0	0
556	E7FG81	>tr|E7FG81|E7FG81_DANRE Uncharacterized protein OS=Danio rerio GN=CU207214.1 PE=4 SV=1		85	83	47	42	37	56	50	50	46	49	47	53	51	62	67	68	56	67	69	62	68	65	61	57	68				17643000	24030000	18271000	29656000	37401000	33306000	24805000	25341000	23808000	27613000	34110000	42623000	102450000	108430000	98497000	128370000	86856000	80318000
44	A2CEW3;F1RB09;F1R1A6;CON__P07589	>tr|A2CEW3|A2CEW3_DANRE Fibronectin 1b OS=Danio rerio GN=fn1b PE=4 SV=2;>tr|F1RB09|F1RB09_DANRE Uncharacterized protein OS=Danio rerio GN=fn1b PE=4 SV=1		78	74	10	8	9	55	53	55	28	26	15	51	55	57	43	42	37	52	34	62	74	66	46	39	58				1190100	827220	1159400	42874000	30654000	44019000	6026200	4527600	2245400	46024000	59997000	61337000	23688000	24283000	39526000	55850000	12983000	192860000
690	F1Q924	>tr|F1Q924|F1Q924_DANRE Uncharacterized protein (Fragment) OS=Danio rerio GN=si:dkey-202m9.3 PE=4 SV=1		74	74	66	57	64	66	64	63	58	58	58	17	17	14	33	31	23	28	12	18	19	14	29	21	26				168230000	119270000	152830000	95524000	92098000	65260000	46191000	50061000	53322000	2464000	2700500	2208100	9635200	8826800	24575000	19043000	7516000	7821600
1103	F1R8U6	>tr|F1R8U6|F1R8U6_DANRE Uncharacterized protein (Fragment) OS=Danio rerio GN=myha PE=4 SV=1		74	2	38	27	38	58	62	53	60	61	65	60	63	65	49	51	45	51	48	36	40	39	37	30	27				0	0	0	0	0	0	289310	351540	434420	373950	397940	1004500	0	0	136140	0	0	0
832	F1QIR4;F1R3Y6;F1Q738	>tr|F1QIR4|F1QIR4_DANRE Uncharacterized protein OS=Danio rerio GN=smyhc1 PE=4 SV=1		70	5	24	24	25	59	64	55	50	57	56	34	43	46	38	38	42	44	47	16	21	25	38	34	38				531190	1168100	1519400	8952800	9242900	9926400	2970900	7747000	10179000	949590	1385500	2340800	1639600	1691300	13416000	15057000	11805000	0
239	B6IDE1;F1QE01	>tr|B6IDE1|B6IDE1_DANRE Slow myosin heavy chain 2 OS=Danio rerio GN=smyhc2 PE=2 SV=1		69	4	23	22	23	56	59	49	54	61	58	35	41	45	38	41	49	52	53	17	21	25	46	39	44				0	0	0	0	184040	0	367960	1370200	901610	137710	194790	164520	328890	153650	1979200	4562800	3093800	0
861	F1QKE8	>tr|F1QKE8|F1QKE8_DANRE Uncharacterized protein (Fragment) OS=Danio rerio GN=col6a3 PE=4 SV=1		67	4	44	39	43	53	52	54	52	53	45	39	39	47	51	52	44	59	52	50	59	54	55	58	53				180580	238000	0	454620	527540	1232600	356560	318310	320270	913050	308380	449370	999240	1812500	3618100	4997700	2221300	4462500
567	E9QBS6;E9QHL6	>tr|E9QBS6|E9QBS6_DANRE Uncharacterized protein OS=Danio rerio GN=CU633479.7 PE=4 SV=1;>tr|E9QHL6|E9QHL6_DANRE Uncharacterized protein OS=Danio rerio GN=CR450736.3 PE=4 SV=1		66	1	21	21	21	51	54	45	47	55	53	32	38	40	35	36	44	49	49	15	22	26	46	41	44				0	0	0	1146600	1571200	785920	919290	2454100	2274100	0	798830	0	364660	0	1345200	1891400	1462600	0
238	B6IDE0	>tr|B6IDE0|B6IDE0_DANRE Slow myosin heavy chain 3 OS=Danio rerio GN=smyhc3 PE=2 SV=1		65	0	21	20	19	48	51	42	44	52	50	30	34	38	32	33	44	49	48	15	22	26	44	41	43				0	0	0	0	0	0	0	0	0	0	0	0	0	0	296620	607440	0	0
565	E9QBA6;E9QGP5	>tr|E9QBA6|E9QBA6_DANRE Uncharacterized protein OS=Danio rerio GN=CU633479.6 PE=4 SV=1;>tr|E9QGP5|E9QGP5_DANRE Uncharacterized protein OS=Danio rerio GN=CR450736.2 PE=4 SV=1		63	3	20	19	18	46	48	41	41	49	47	29	33	37	31	31	42	49	47	15	22	25	44	41	41				0	0	0	0	0	0	0	0	0	0	0	0	0	0	0	140680	0	0
1212	Q1LWN2;F1R8M4;F1R743	>tr|Q1LWN2|Q1LWN2_DANRE Uncharacterized protein OS=Danio rerio GN=vtg1 PE=2 SV=1		63	9	0	1	0	2	2	2	2	4	1	3	3	3	3	3	44	52	55	51	59	54	47	47	49				0	0	0	0	1300500	39026	0	298530	0	943680	1600400	683280	278800	433410	171500000	152500000	68264000	146600000
145	A9JRG7	>tr|A9JRG7|A9JRG7_DANRE Uncharacterized protein OS=Danio rerio GN=zgc:172323 PE=2 SV=1		61	57	6	4	4	6	7	4	41	36	19	56	56	57	49	47	36	32	9	35	39	50	39	33	43				129860	204090	301760	166850	220890	110320	30425000	11437000	2674900	1696000000	1083600000	1134500000	89731000	76335000	57493000	24881000	1494000	64533000
928	F1QXH0;F1QSE1;E7F9P6	>tr|F1QXH0|F1QXH0_DANRE Uncharacterized protein OS=Danio rerio GN=vmhcl PE=4 SV=1;>tr|F1QSE1|F1QSE1_DANRE Uncharacterized protein OS=Danio rerio GN=vmhcl PE=4 SV=1		61	12	17	13	15	37	42	35	45	54	55	24	29	28	22	24	27	31	32	11	18	20	27	23	22				0	0	0	0	73264	0	551720	2975000	8359600	0	0	0	0	0	0	0	0	0
92	A5WWJ4	>tr|A5WWJ4|A5WWJ4_DANRE Matrilin 1 OS=Danio rerio GN=matn1 PE=4 SV=1		60	31	58	50	51	48	49	49	47	56	45	40	41	43	45	43	40	47	46	43	48	41	46	43	41				4340700000	2744000000	3708100000	946980000	1413200000	775230000	3332500000	2949400000	2869900000	1049900000	689390000	745610000	931840000	971580000	1791400000	1490300000	1357800000	1191300000
946	F1R2S5;F1QTW6;F1QHH9	>tr|F1R2S5|F1R2S5_DANRE Uncharacterized protein (Fragment) OS=Danio rerio GN=vtg5 PE=4 SV=1;>tr|F1QTW6|F1QTW6_DANRE Uncharacterized protein OS=Danio rerio GN=vtg5 PE=4 SV=1		58	9	0	1	0	2	2	1	3	3	1	3	3	3	3	2	39	45	47	43	54	44	40	41	41				0	0	0	0	0	0	0	0	0	0	0	0	0	0	35423000	19785000	14415000	20818000
295	B8JL43;F1R858;E7FBJ1;B8JL44;E7F6H5	>tr|B8JL43|B8JL43_DANRE Transferrin-a OS=Danio rerio GN=tfa PE=4 SV=1;>tr|F1R858|F1R858_DANRE Uncharacterized protein OS=Danio rerio GN=tfa PE=4 SV=1;>tr|E7FBJ1|E7FBJ1_DANRE Uncharacterized protein OS=Danio rerio GN=tfa PE=4 SV=1		57	57	16	14	17	48	44	50	43	39	37	49	45	47	42	45	33	39	37	44	37	45	30	34	32				4700000	5129900	5546000	55379000	43490000	65565000	70026000	45906000	39219000	141710000	104370000	78926000	55096000	64634000	27377000	41738000	52330000	123340000
1004	F1QZW1	>tr|F1QZW1|F1QZW1_DANRE Uncharacterized protein OS=Danio rerio GN=vmhc PE=4 SV=1		55	2	22	16	19	44	50	41	42	48	48	26	33	35	29	29	32	35	37	12	21	22	31	24	27				0	0	0	0	0	0	55166	249550	135640	0	0	0	0	0	0	0	0	0
595	E9QFD8	>tr|E9QFD8|E9QFD8_DANRE Uncharacterized protein OS=Danio rerio GN=vtg4 PE=4 SV=1		53	0	0	1	0	1	0	2	1	2	0	1	2	1	2	2	38	44	41	44	48	45	39	39	40				0	0	0	0	0	0	0	0	0	0	0	0	0	0	3630500	4668400	2026300	2780700
318	CON__O43790	>O43790 SWISS-PROT:O43790|Hb6_Keratin, type II cuticular Hb6 (Hair keratin, type II Hb6) (ghHb6) - Homo sapiens (Human).		52	7	10	30	48	10	16	3	7	18	6	3	26	25	16	17	13	1	0	16	5	3	1	6	2			+	387260	935980000	2191700000	1550000	11553000	409500	220670	20550000	2047700	159370	4478800	4737000	17274000	16846000	9645500	0	0	61898000
1061	F1R5K7;F1RCP6;Q1LVP7	>tr|F1R5K7|F1R5K7_DANRE Uncharacterized protein OS=Danio rerio GN=hspg2 PE=4 SV=1;>tr|F1RCP6|F1RCP6_DANRE Uncharacterized protein OS=Danio rerio GN=hspg2 PE=4 SV=1		52	52	23	17	24	47	49	50	35	36	35	25	23	29	26	20	29	34	21	20	32	27	19	17	13				11240000	9560300	7998700	43678000	49024000	47228000	9147400	7442700	8931600	6070000	5681200	6225900	4343100	4110300	18174000	10347000	8406700	9098300
1148	F1RDU8;F1R5I2;F1R526	>tr|F1RDU8|F1RDU8_DANRE Uncharacterized protein (Fragment) OS=Danio rerio GN=si:dkey-65b12.6 PE=4 SV=1		52	32	37	31	42	2	4	2	47	49	51	3	8	6	19	14	18	19	18	0	1	0	2	0	1				17801000	15586000	24601000	67940	195640	210810	56176000	80812000	226380000	94101	423200	289260	1809500	1966300	8832000	4627500	2645300	0
324	CON__P04264	>P04264 SWISS-PROT:P04264|K2C1_HUMAN Keratin, type II cytoskeletal 1 (Cytokeratin-1) (CK-1) (Keratin-1) (K1) (67 kDa cytokeratin) (Hair alpha protein)		50	44	44	44	43	42	42	33	39	40	41	40	37	37	36	39	32	33	38	36	37	36	26	29	36			+	685100000	814560000	544890000	187280000	147670000	102280000	513890000	345340000	662500000	545150000	489340000	474140000	402210000	403330000	370880000	148480000	221690000	280480000
650	F1Q6P3	>tr|F1Q6P3|F1Q6P3_DANRE Uncharacterized protein (Fragment) OS=Danio rerio GN=col6a1 PE=4 SV=1		49	49	41	33	37	44	43	44	39	38	34	28	33	30	34	35	34	33	37	32	29	31	32	36	34				113250000	112210000	120360000	588310000	492430000	664810000	206850000	124850000	101250000	20447000	28570000	30974000	90301000	81785000	343400000	355940000	143710000	95763000
339	CON__Q14533	>Q14533 TREMBL:Q14533|Hb1_Keratin, type II cuticular Hb1 (Hair keratin, type II Hb1) (ghHKb1) (ghHb1) (MLN 137) - Homo sapiens (Human).		48	2	10	29	44	10	16	3	6	18	5	2	23	23	16	16	12	1	0	15	5	3	1	5	2			+	0	0	44925000	0	0	0	0	0	0	0	0	0	0	0	0	0	0	0
667	F1Q7L0;F1R887;F1RBA0	>tr|F1Q7L0|F1Q7L0_DANRE Uncharacterized protein (Fragment) OS=Danio rerio GN=vtg4 PE=4 SV=1;>tr|F1R887|F1R887_DANRE Uncharacterized protein OS=Danio rerio GN=vtg4 PE=4 SV=1;>tr|F1RBA0|F1RBA0_DANRE Uncharacterized protein OS=Danio rerio GN=vtg4 PE=4 SV=1		48	1	0	1	0	1	0	0	1	2	0	1	2	1	2	2	35	41	37	41	44	41	36	35	37				0	0	0	0	0	0	0	0	0	0	0	0	0	0	0	0	0	0
958	F1QV15;F1R992;F1R2S0	>tr|F1QV15|F1QV15_DANRE Uncharacterized protein (Fragment) OS=Danio rerio GN=si:rp71-23d18.1 PE=4 SV=1		48	5	0	1	0	2	1	1	3	3	1	2	3	2	3	2	36	43	41	40	46	43	38	39	37				0	0	0	0	0	0	0	0	0	0	0	0	0	0	875240	404670	213100	339260
332	CON__P78386	>P78386 SWISS-PROT:P78386|Hb5_Keratin, type II cuticular Hb5 (Hair keratin, type II Hb5) - Homo sapiens (Human).		47	18	6	29	45	9	15	4	4	15	4	3	23	23	20	21	11	0	0	16	4	3	1	6	2			+	125970	47315000	756070000	51671	441040	0	0	178660	0	154810	309370	220120	308550	297030	332580	0	0	21174000
185	B0S6K5;F1QSR3;F1QUN5	>tr|B0S6K5|B0S6K5_DANRE Tenascin W OS=Danio rerio GN=tnw PE=4 SV=1;>tr|F1QSR3|F1QSR3_DANRE Uncharacterized protein OS=Danio rerio GN=tnw PE=4 SV=1		47	6	14	15	15	46	43	45	15	10	10	21	24	31	21	22	6	11	8	10	14	12	12	13	14				7481000	9432300	10081000	175540000	172320000	190990000	3628400	2492300	2668100	10658000	11228000	9681100	10312000	11112000	3408800	3274900	2699500	3069900
753	F1QDL1	>tr|F1QDL1|F1QDL1_DANRE Uncharacterized protein OS=Danio rerio GN=col1a1b PE=4 SV=1		47	45	22	22	21	35	38	39	43	40	39	44	46	44	39	39	43	42	41	41	43	42	35	38	43				51157000	99087000	66214000	537360000	524310000	527850000	1813900000	1081000000	775720000	2114200000	1700400000	1218400000	1298800000	1143400000	6241200000	3491700000	3372200000	4768300000
842	F1QJC9;F1QSC5	>tr|F1QJC9|F1QJC9_DANRE Uncharacterized protein OS=Danio rerio GN=col1a1a PE=4 SV=1;>tr|F1QSC5|F1QSC5_DANRE Uncharacterized protein OS=Danio rerio GN=col1a1a PE=4 SV=1		47	46	17	17	16	29	27	32	38	36	29	41	40	44	37	41	44	41	42	44	39	38	35	40	41				43519000	65312000	49406000	288730000	385120000	337270000	1470600000	632190000	350960000	1388700000	1237200000	890300000	1282100000	1310800000	3055900000	1846200000	1786400000	2968200000
344	CON__QQ6NT21	>QQ6NT21 TREMBL:Q6NT21|Keratin, hair, basic, 3 - Homo sapiens (Human).		46	3	10	29	43	12	15	3	6	18	4	3	21	23	16	17	13	0	0	15	4	2	2	4	1			+	0	0	41924000	0	0	0	0	0	0	0	0	45654	0	0	0	0	0	0
305	B8JLS3;E7F7P7	>tr|B8JLS3|B8JLS3_DANRE Myosin, heavy polypeptide 6, cardiac muscle, alpha OS=Danio rerio GN=myh6 PE=4 SV=1		46	8	14	15	17	28	33	25	38	39	40	23	28	24	20	25	21	23	25	14	16	18	20	17	18				0	0	0	0	0	0	2100400	211460	202200	0	0	0	0	0	0	0	0	0
575	E9QCG6;Q6IQX2	>tr|E9QCG6|E9QCG6_DANRE Uncharacterized protein OS=Danio rerio GN=col1a2 PE=4 SV=1;>tr|Q6IQX2|Q6IQX2_DANRE Collagen, type I, alpha 2 OS=Danio rerio GN=col1a2 PE=2 SV=1		46	46	23	24	22	32	32	37	34	34	35	38	36	36	36	37	40	40	41	39	38	39	37	39	39				306730000	338710000	197820000	1988500000	2136500000	1805800000	4037800000	2468500000	2718000000	4672300000	3553900000	3101700000	4301200000	4396100000	12951000000	8144200000	7092200000	9226700000
6	A0JMP4;F1QDJ6	>tr|A0JMP4|A0JMP4_DANRE ATPase, Ca++ transporting, cardiac muscle, fast twitch 1 like OS=Danio rerio GN=atp2a1l PE=2 SV=1;>tr|F1QDJ6|F1QDJ6_DANRE Uncharacterized protein (Fragment) OS=Danio rerio GN=atp2a1l PE=3 SV=1		44	22	15	12	16	29	28	27	33	38	35	30	33	40	28	31	28	34	34	16	32	18	33	28	23				11977000	5168800	13223000	28264000	40503000	22703000	58720000	177730000	157560000	47456000	79298000	122430000	33964000	33822000	82601000	118110000	104560000	13829000
1644	Q9DGL6	>tr|Q9DGL6|Q9DGL6_DANRE ATPase, Na+/K+ transporting, alpha 1 polypeptide OS=Danio rerio GN=atp1a1 PE=2 SV=1		44	16	39	39	38	34	39	35	29	36	35	21	28	27	26	28	16	16	14	5	13	10	13	11	10				276640000	153670000	224050000	54459000	74506000	36360000	17761000	49052000	48744000	12054000	18667000	22988000	15245000	12575000	9199300	7035900	4893100	1611900
531	E7FDM6;F1R6W5	>tr|E7FDM6|E7FDM6_DANRE Uncharacterized protein OS=Danio rerio GN=CR854881.3 PE=4 SV=1		43	43	28	25	25	6	8	9	43	43	42	1	0	2	31	26	8	5	5	0	1	1	0	0	2				21659000	12156000	26812000	352550	1153200	720940	60305000	96431000	191470000	0	0	324630	15683000	16899000	3028400	1153100	904260	0
632	F1Q518;F1RAL0;E7FCV8	>tr|F1Q518|F1Q518_DANRE Uncharacterized protein OS=Danio rerio GN=col6a2 PE=4 SV=1		43	43	32	29	33	40	36	38	32	35	31	20	25	25	31	28	31	27	26	25	35	27	28	27	30				149310000	105280000	122030000	631830000	525580000	527320000	203110000	141950000	113600000	17220000	26288000	26369000	69426000	63382000	255740000	273400000	140900000	56303000
1027	F1R2T3;Q1MTC6	>tr|F1R2T3|F1R2T3_DANRE Uncharacterized protein OS=Danio rerio GN=vtg7 PE=4 SV=1;>tr|Q1MTC6|Q1MTC6_DANRE Novel protein similar to vitellogenin 1 (Vg1) OS=Danio rerio GN=vtg7 PE=4 SV=1		43	2	0	0	0	1	2	2	1	2	1	2	1	2	1	1	30	38	37	34	41	37	31	31	30				0	0	0	0	0	0	0	0	0	0	0	0	0	0	0	139330	0	0
331	CON__P78385	>P78385 SWISS-PROT:P78385|Hb3_Keratin, type II cuticular Hb3 (Hair keratin, type II Hb3) - Homo sapiens (Human).		42	1	8	26	39	11	15	3	5	17	4	2	21	22	15	16	12	0	0	14	3	1	1	4	1			+	0	0	240480	0	0	0	0	0	0	0	0	0	0	0	0	0	0	0
186	B0S6K6	>tr|B0S6K6|B0S6K6_DANRE Tenascin W OS=Danio rerio GN=tnw PE=4 SV=1		42	1	12	13	12	41	38	41	13	7	10	19	19	25	19	20	5	11	7	10	14	12	12	13	14				0	0	0	0	1128000	0	0	0	0	0	0	0	0	0	0	0	0	0
1153	F1RE78	>tr|F1RE78|F1RE78_DANRE Uncharacterized protein (Fragment) OS=Danio rerio GN=fbn2b PE=4 SV=1		42	42	32	27	27	39	38	37	29	32	30	25	28	31	31	33	12	11	7	11	26	10	17	15	24				34932000	26511000	24679000	66066000	56629000	49635000	39594000	53657000	54528000	16356000	23012000	17779000	54199000	48996000	6260000	5801000	1725900	3747200
392	E7F1L7;F1QL44;F1QP68	>tr|E7F1L7|E7F1L7_DANRE Uncharacterized protein OS=Danio rerio GN=CU302436.1 PE=4 SV=1		41	39	1	5	1	4	1	3	6	14	9	38	38	38	30	31	22	7	1	19	33	27	28	19	26				0	605440	0	253350	0	808700	1001400	1735600	910930	22602000	28985000	37796000	4711500	6282400	9475000	893350	0	5543900
1316	Q5U3A4;Q642Z0;E9QGF0;E9QF60	>tr|Q5U3A4|Q5U3A4_DANRE Atp2a1 protein OS=Danio rerio GN=atp2a1 PE=2 SV=1;>tr|Q642Z0|Q642Z0_DANRE Sarcoendoplasmic reticulum calcium ATPase OS=Danio rerio GN=atp2a1 PE=2 SV=1		40	18	23	19	23	31	31	33	35	38	37	31	34	35	31	33	27	31	29	14	18	15	26	23	24				2192300	1658000	2169100	10397000	13868000	6967200	21846000	60530000	51441000	7754400	9201600	11539000	5846000	5987000	13368000	9480000	8021600	136390
330	CON__P35908;F1QEW2	>P35908 SWISS-PROT:P35908|K22E_HUMAN Keratin, type II cytoskeletal 2 epidermal (Cytokeratin-2e) (K2e) (CK 2e) (keratin-2)		39	29	37	33	36	29	31	25	34	33	34	34	33	32	34	33	28	23	26	24	29	27	19	18	32			+	119020000	120500000	114290000	25689000	17597000	13706000	71548000	71321000	139470000	104410000	102050000	81673000	94751000	99998000	78834000	26112000	52665000	50101000
1068	F1R6B0;Q1LYN3	>tr|F1R6B0|F1R6B0_DANRE Uncharacterized protein OS=Danio rerio GN=si:dkey-6n6.1 PE=4 SV=1;>tr|Q1LYN3|Q1LYN3_DANRE Novel protein similar to vertebrate extracellular matrix protein 2, female organ and adipocyte specific (ECM2) (Fragment) OS=Danio rerio GN=si		38	38	24	25	21	34	33	33	30	29	28	29	29	29	28	26	27	24	25	31	33	28	21	17	29				65065000	60378000	58197000	217590000	199430000	235160000	116420000	70469000	68972000	119480000	91016000	126930000	43120000	51343000	81354000	68663000	47874000	180480000
764	F1QEE7;F1QL35;F1RC26	>tr|F1QEE7|F1QEE7_DANRE Uncharacterized protein (Fragment) OS=Danio rerio GN=thbs1 PE=4 SV=1;>tr|F1QL35|F1QL35_DANRE Uncharacterized protein OS=Danio rerio GN=thbs1 PE=4 SV=1		37	35	29	28	28	28	30	28	32	30	29	27	27	29	31	31	17	22	22	22	26	22	22	18	23				37635000	27744000	23721000	22301000	17373000	24825000	87769000	51081000	54346000	54555000	40839000	44716000	66495000	71036000	16967000	27299000	24347000	31442000
226	B3DI58;E7F5E2;F1QYG7	>tr|B3DI58|B3DI58_DANRE Uncharacterized protein OS=Danio rerio GN=zgc:194470 PE=2 SV=1;>tr|E7F5E2|E7F5E2_DANRE Uncharacterized protein OS=Danio rerio GN=zgc:194470 PE=4 SV=1;>tr|F1QYG7|F1QYG7_DANRE Uncharacterized protein OS=Danio rerio GN=zgc:194470 PE=4		36	32	5	6	4	15	11	13	23	25	14	31	33	34	28	27	22	15	7	17	21	23	26	26	27				480730	267200	1276000	1535200	905560	1153100	13568000	4660700	3729700	464370000	301060000	486210000	144620000	176640000	23438000	2885900	2596200	20768000
644	F1Q661;B7ZDB4	>tr|F1Q661|F1Q661_DANRE Uncharacterized protein OS=Danio rerio GN=si:dkey-32e6.6 PE=4 SV=1;>tr|B7ZDB4|B7ZDB4_DANRE Novel protein similar to vertebrate extracellular matrix protein 2, female organ and adipocyte specific (ECM2) OS=Danio rerio GN=si:dkey-32e6		36	36	28	21	21	35	33	35	28	30	28	32	32	32	29	28	29	33	34	34	32	29	27	32	30				37613000	26055000	43050000	170490000	158000000	194350000	219500000	257310000	162360000	417680000	292710000	335740000	332420000	339240000	303060000	513450000	543570000	653920000
1225	Q1MTC4;F1R876;REV__Q1MTC4;REV__F1R876	>tr|Q1MTC4|Q1MTC4_DANRE Novel protein similar to vitellogenin 1 (Vg1) OS=Danio rerio GN=vtg2 PE=4 SV=1;>tr|F1R876|F1R876_DANRE Uncharacterized protein OS=Danio rerio GN=vtg2 PE=4 SV=1		36	28	0	0	0	1	1	1	1	0	2	0	1	0	0	0	24	31	22	26	34	28	26	19	22				0	0	0	0	0	0	0	0	204630	0	0	0	0	0	7862700	4634700	3663900	4447400
348	CON__QQ9UE12;CON__Q15323	>QQ9UE12 TREMBL:Q9UE12|Type I hair keratin 1 - Homo sapiens (Human).;>Q15323 TREMBL:Q15323|HA1_Keratin, type I cuticular HA1 (Hair keratin, type I HA1)		34	7	5	18	34	10	13	4	8	21	9	2	18	15	14	12	8	3	2	16	7	2	5	5	5			+	3730200	580310000	739730000	1099400	21910000	323080	1269700	5239700	1804800	1775200	4635300	3044500	7271400	6491000	8378400	2306800	42630	64650000
1057	F1R4X4;F1R5X4;Q1LWX5;F1QBU0;E7F7J8	>tr|F1R4X4|F1R4X4_DANRE Uncharacterized protein OS=Danio rerio GN=col11a2 PE=4 SV=1;>tr|F1R5X4|F1R5X4_DANRE Uncharacterized protein OS=Danio rerio GN=col11a2 PE=4 SV=1;>tr|Q1LWX5|Q1LWX5_DANRE Collagen type XI alpha-2 OS=Danio rerio GN=col11a2 PE=2 SV=2;>tr		34	33	15	12	14	23	23	22	23	26	27	26	27	24	27	24	22	23	23	25	22	25	16	19	21				16171000	23978000	19749000	44929000	45114000	62043000	245800000	137150000	141370000	179330000	153790000	93791000	62028000	70046000	157400000	167580000	174370000	286250000
1118	F1RA03;E7F6E5	>tr|F1RA03|F1RA03_DANRE Uncharacterized protein (Fragment) OS=Danio rerio GN=CABZ01079764.1 PE=3 SV=1		34	34	3	3	3	14	7	10	21	22	11	33	31	32	29	28	17	20	11	19	25	28	27	23	26				226970	177000	226290	1471400	817650	1205100	24709000	10730000	2064600	994690000	944370000	1096500000	229920000	307170000	38417000	31318000	2965500	77682000
1240	Q2LDA1;B3DLK0	>tr|Q2LDA1|Q2LDA1_DANRE Collagen type II, alpha 1 OS=Danio rerio GN=col2a1a PE=2 SV=1;>tr|B3DLK0|B3DLK0_DANRE Col2a1a protein OS=Danio rerio GN=col2a1a PE=2 SV=1		34	29	25	26	22	25	31	30	30	32	32	29	28	28	23	25	25	21	20	24	23	24	14	11	17				354430000	661120000	260770000	1255900000	1344900000	1291400000	3414600000	1756200000	2130200000	1450700000	1294200000	878080000	545510000	497230000	1012900000	981060000	698340000	1845800000
1435	Q6P271	>tr|Q6P271|Q6P271_DANRE ATPase, Na+/K+ transporting, alpha 3a polypeptide OS=Danio rerio GN=atp1a3a PE=2 SV=1		34	7	29	25	29	15	19	15	17	21	19	10	14	15	12	11	7	8	6	3	5	3	7	5	3				26839000	19671000	16607000	1064200	1915600	999310	727290	2740000	3538500	0	1624300	2353900	0	0	0	1380800	0	0
329	CON__P35527	>P35527 SWISS-PROT:P35527|K1C9_HUMAN Keratin, type I cytoskeletal 9 (Cytokeratin-9) (CK-9) (Keratin-9) (K9)		33	33	27	27	28	24	23	25	30	27	27	28	28	29	26	26	19	20	24	22	28	23	21	17	25			+	232850000	362580000	255000000	77670000	49025000	41559000	245550000	121910000	201320000	181640000	167300000	183080000	163440000	169030000	212280000	71933000	107490000	82769000
468	E7F8F6;F1R851	>tr|E7F8F6|E7F8F6_DANRE Uncharacterized protein OS=Danio rerio GN=CU462827.1 PE=3 SV=1;>tr|F1R851|F1R851_DANRE Uncharacterized protein (Fragment) OS=Danio rerio GN=CU462827.1 PE=3 SV=1		33	7	29	26	29	13	16	15	18	22	19	10	15	17	12	11	8	10	6	2	6	3	7	6	3				2848500	2196800	2275200	164150	0	0	0	171650	0	0	0	189800	0	0	0	233470	0	0
152	B0R068;B3DFZ2	>tr|B0R068|B0R068_DANRE ATPase, Na+/K+ transporting, alpha 1b polypeptide OS=Danio rerio GN=atp1a1b PE=3 SV=1		31	4	29	25	25	23	27	22	21	25	22	17	20	21	18	17	9	10	7	2	6	3	5	5	4				9725100	7742900	3387500	1272500	2509200	671780	488980	2077000	2386600	452350	722630	846700	317520	245610	1668700	1196900	0	0
1164	F1REW1;Q503K1	>tr|F1REW1|F1REW1_DANRE Uncharacterized protein OS=Danio rerio GN=tgfbi PE=4 SV=1;>tr|Q503K1|Q503K1_DANRE Transforming growth factor, beta-induced OS=Danio rerio GN=tgfbi PE=2 SV=1		31	31	26	17	22	30	27	29	26	21	19	21	24	24	18	17	13	16	20	17	21	18	19	13	14				26112000	26386000	21452000	136870000	129420000	180000000	15722000	11504000	8363700	26463000	31129000	38797000	8159100	8525700	14122000	10580000	11053000	9947300
326	CON__P13645	>P13645 SWISS-PROT:P13645|K1C10_HUMAN Keratin, type I cytoskeletal 10 OS=Homo sapiens GN=KRT10 PE=1 SV=4		30	27	27	27	27	26	22	27	29	27	26	27	28	27	27	27	23	23	23	21	23	24	20	19	24			+	229940000	348480000	177030000	36454000	45947000	19564000	160180000	127860000	264590000	128140000	151600000	110280000	181820000	181670000	105050000	29685000	60566000	74518000
46	A2RUX5;F1QSJ2	>tr|A2RUX5|A2RUX5_DANRE Uncharacterized protein OS=Danio rerio GN=col11a1 PE=2 SV=1		30	27	16	14	15	25	24	26	28	23	23	25	26	22	19	21	16	15	20	20	14	20	9	9	17				30253000	30355000	50341000	129980000	117150000	131860000	382490000	265180000	235670000	259760000	228260000	212990000	149580000	161230000	125960000	124250000	161750000	113790000
93	A5WWJ5	>tr|A5WWJ5|A5WWJ5_DANRE Matrilin 1 (Fragment) OS=Danio rerio GN=matn1 PE=4 SV=1		30	2	29	23	26	23	21	22	24	27	19	17	18	22	22	22	19	25	23	22	25	22	24	22	22				1016500	0	295600	0	0	0	291590	191760	0	0	0	0	0	0	0	0	0	0
289	B8JKS7	>tr|B8JKS7|B8JKS7_DANRE ATPase, Na+/K+ transporting, alpha 1a.4 polypeptide OS=Danio rerio GN=atp1a1a.4 PE=3 SV=1		30	5	24	23	25	22	25	24	20	27	25	18	20	22	15	16	9	8	7	2	6	3	6	4	4				583300	0	303260	1187900	5285200	412250	0	701740	855620	273660	1155100	2043700	0	0	0	0	0	0
824	F1QI55	>tr|F1QI55|F1QI55_DANRE Uncharacterized protein (Fragment) OS=Danio rerio GN=apoa4 PE=4 SV=1		30	0	13	12	12	26	25	25	21	21	17	23	23	24	25	26	20	25	25	25	17	22	22	24	24				6253400	6933800	9121900	73326000	40375000	81276000	25202000	22120000	15349000	50799000	44558000	43773000	122400000	105210000	49208000	94482000	91812000	117490000
1025	F1R2N5;F1R2V0;F1QZP4	>tr|F1R2N5|F1R2N5_DANRE Uncharacterized protein OS=Danio rerio GN=zgc:113006 PE=3 SV=1;>tr|F1R2V0|F1R2V0_DANRE Uncharacterized protein (Fragment) OS=Danio rerio GN=zgc:113006 PE=3 SV=1		30	30	25	21	24	28	28	28	18	20	17	11	13	14	12	13	6	5	5	1	7	4	2	4	4				82285000	60548000	51638000	264230000	402470000	160020000	9497000	14608000	14349000	2072700	3208200	3332000	3082800	2228100	2461500	452610	352700	0
1287	Q5NJJ5;Q6PYX2;F1Q7C5;F1R4G5;F1QER9;F1R4G4;F1RBG4	>tr|Q5NJJ5|Q5NJJ5_DANRE Matrilin-4 OS=Danio rerio GN=matn4 PE=2 SV=1;>tr|Q6PYX2|Q6PYX2_DANRE Matrilin-4-like protein OS=Danio rerio GN=matn4 PE=2 SV=1;>tr|F1Q7C5|F1Q7C5_DANRE Uncharacterized protein OS=Danio rerio GN=matn4 PE=4 SV=1;>tr|F1R4G5|F1R4G5_DANRE		30	29	29	28	29	26	27	23	24	24	25	18	17	16	17	16	19	14	12	9	11	9	6	7	10				301140000	220470000	341230000	65069000	55066000	58081000	97899000	78637000	78388000	21157000	27022000	18426000	28720000	29638000	41647000	82490000	40549000	11060000
333	CON__PO76009	>PO76009 SWISS-PROT:O76009|KT33A_HUMAN Keratin, type I cuticular Ha3-I OS=Homo sapiens		29	0	4	12	29	7	10	4	6	14	7	1	13	12	10	9	7	2	2	12	6	1	4	3	5			+	0	0	30492000	0	0	0	0	0	0	0	0	0	0	0	0	0	0	0
337	CON__Q14525;A2BF93;F1QR21;F1Q8Y7;F1R5D5;B0UYR9;B0UYR8;F1RD99;E7FCW1	>Q14525 TREMBL:Q14525|HA3-II_Keratin, type I cuticular HA3-II (Hair keratin, type I HA3-II)		29	7	4	14	29	9	11	3	6	15	6	2	13	13	12	11	9	3	4	12	7	2	6	5	6			+	0	7585500	0	0	1869100	0	0	1679200	0	0	0	0	0	787580	0	0	0	0
1204	Q1LVF0	>sp|Q1LVF0|LAMC1_DANRE Laminin subunit gamma-1 OS=Danio rerio GN=lamc1 PE=2 SV=2		29	29	17	17	19	28	25	27	17	20	17	10	11	11	5	5	14	16	11	7	12	7	13	12	9				7079600	6278200	5938400	40011000	29803000	31732000	4257700	6205200	8430000	1028000	1797800	1929500	926870	846910	4483800	7971900	4670300	2271400
1405	Q6NWF6	>sp|Q6NWF6|K2C8_DANRE Keratin, type II cytoskeletal 8 OS=Danio rerio GN=krt8 PE=1 SV=1		29	15	9	11	11	10	8	7	19	19	17	23	21	21	21	19	12	11	12	18	19	19	14	13	19				1592300	4389600	906710	1046500	297120	706740	21068000	14372000	23624000	49510000	49429000	41069000	33648000	26229000	11112000	9065500	3624100	9161100
1302	Q5RI45	>tr|Q5RI45|Q5RI45_DANRE Decorin OS=Danio rerio GN=dcn PE=2 SV=1		29	29	19	19	19	27	26	27	22	22	19	20	21	23	22	19	14	22	21	20	21	21	21	21	21				28195000	31499000	33281000	469850000	354230000	422040000	151750000	96498000	102750000	295140000	209100000	211900000	212390000	139990000	268050000	178680000	161460000	549840000
492	E7FAN5;F1R704	>tr|E7FAN5|E7FAN5_DANRE Uncharacterized protein OS=Danio rerio GN=f2 PE=3 SV=1;>tr|F1R704|F1R704_DANRE Uncharacterized protein OS=Danio rerio GN=f2 PE=3 SV=1		28	28	14	14	9	22	21	25	20	19	19	22	21	21	21	22	21	24	23	24	22	21	20	20	22				11965000	15365000	11736000	86827000	69833000	83951000	53894000	28564000	27107000	84626000	55324000	62270000	114780000	118000000	109890000	119930000	130180000	143770000
858	F1QK60;A8KBU6;F1RDG4;E9QFT4	>tr|F1QK60|F1QK60_DANRE Uncharacterized protein OS=Danio rerio GN=krt4 PE=3 SV=1		28	10	13	14	13	11	11	9	23	23	20	26	22	25	24	20	12	11	8	18	22	20	16	13	21				2422300	6209300	2730800	1277100	1086400	993140	32292000	19244000	22758000	57018000	30514000	29300000	10915000	11950000	6253100	6318400	1798900	9742400
899	F1QPN2;B8JL13	>tr|F1QPN2|F1QPN2_DANRE Uncharacterized protein OS=Danio rerio GN=si:dkey-87m23.1 PE=4 SV=1		28	27	12	12	15	22	23	24	24	22	25	27	23	27	26	25	18	16	15	19	19	19	13	15	16				4061200	5710400	5190300	20255000	13549000	22685000	51482000	37688000	29337000	73817000	67111000	67406000	86722000	84710000	17569000	19215000	41568000	28154000
962	F1QV31;F1R5A5;Q6P3K5;E9QBD7	>tr|F1QV31|F1QV31_DANRE Uncharacterized protein OS=Danio rerio GN=krt5 PE=3 SV=1;>tr|F1R5A5|F1R5A5_DANRE Uncharacterized protein OS=Danio rerio GN=krt5 PE=3 SV=1;>tr|Q6P3K5|Q6P3K5_DANRE Krt5 protein OS=Danio rerio GN=krt5 PE=2 SV=1;>tr|E9QBD7|E9QBD7_DANRE		28	7	14	15	13	9	11	8	23	23	22	27	23	26	24	23	16	12	11	15	22	20	13	13	21				674300	313790	576510	0	310770	0	4030100	1756700	2743000	8756000	6969700	7787600	1875600	2089800	1105800	1170800	840700	1052900
1039	F1R3G4	>tr|F1R3G4|F1R3G4_DANRE Uncharacterized protein OS=Danio rerio GN=myh10 PE=4 SV=1		28	19	9	7	8	25	23	22	17	17	15	15	13	18	10	11	6	5	5	5	6	9	12	3	6				1079000	2264500	1491300	5409800	5117700	7236400	1363800	2117100	1476600	1545600	2129300	2365300	1039200	1020400	138180	628000	382530	514130
144	A9JRB3	>tr|A9JRB3|A9JRB3_DANRE Uncharacterized protein OS=Danio rerio GN=htra1b PE=2 SV=1		27	20	2	1	3	9	11	12	21	23	20	20	20	20	26	27	19	17	16	18	19	18	19	16	19				587190	0	292510	1259100	939610	1652300	6879100	4223300	4910800	7022500	5947500	5055800	51240000	54000000	8299700	13101000	7893400	11057000
726	F1QC64;F1QJK4	>tr|F1QC64|F1QC64_DANRE Uncharacterized protein (Fragment) OS=Danio rerio GN=si:ch211-150d5.2 PE=4 SV=1		27	17	12	8	8	24	24	21	19	23	19	17	17	18	12	12	9	8	6	6	9	6	14	5	9				1230400	1885900	2662700	2602000	2765500	3100300	2139800	2388900	3676400	1605900	4814900	2645400	2041100	1682800	538560	320250	248770	260490
1107	F1R966	>tr|F1R966|F1R966_DANRE Uncharacterized protein OS=Danio rerio GN=cltca PE=4 SV=1		27	7	20	19	21	16	17	12	20	25	23	16	19	20	14	15	7	6	2	1	8	5	8	4	1				6560900	3458800	4900300	1882800	2189700	1930500	2687900	8002500	6532100	1312900	2935200	2364900	1129100	1586700	501970	641990	250660	0
961	F1R9X9;F1QV29	>tr|F1R9X9|F1R9X9_DANRE Uncharacterized protein OS=Danio rerio GN=c3b PE=4 SV=1;>tr|F1QV29|F1QV29_DANRE Uncharacterized protein (Fragment) OS=Danio rerio GN=c3b PE=4 SV=1		27	11	14	14	16	24	24	25	20	22	21	21	22	23	23	20	17	16	17	21	24	20	13	14	17				3364400	4557800	4236500	16609000	14249000	16380000	13252000	12246000	12482000	19109000	16583000	17781000	11323000	14931000	8492900	12920000	8595800	20780000
1521	Q75U66;F1QHK3;E7FBL9;F1QMU1;E9QJA4;E9QGD2	>tr|Q75U66|Q75U66_DANRE Periostin OS=Danio rerio GN=postn PE=2 SV=1;>tr|F1QHK3|F1QHK3_DANRE Uncharacterized protein OS=Danio rerio GN=postn PE=4 SV=1;>tr|E7FBL9|E7FBL9_DANRE Uncharacterized protein OS=Danio rerio GN=postn PE=4 SV=1		27	26	22	17	20	27	26	22	22	21	22	23	23	25	21	22	23	24	25	22	24	22	18	22	21				29724000	34460000	27606000	96643000	104550000	120630000	26400000	25586000	22674000	50614000	47231000	56713000	90724000	77618000	102570000	110620000	67568000	139960000
321	CON__P02538	>P02538 SWISS-PROT:P02538|KRT6a_Keratin Tax_Id=9606 Gene_Symbol=KRT6A Keratin, type II cytoskeletal 6A		26	1	21	21	19	18	20	16	22	20	22	23	19	22	18	18	16	9	13	13	18	19	9	8	17			+	5111400	11504000	2903400	2435000	4500300	2383400	8037000	4869900	9909200	9709600	5235100	11593000	6640700	3905500	20950000	1951400	4214000	3758400
323	CON__P04259;CON__P48668	>P04259 SWISS-PROT:P04259|KRT6b_Keratin Tax_Id=9606 Gene_Symbol=KRT6B Keratin, type II cytoskeletal 6B;>P48668 SWISS-PROT:P48668|KRT6c_Keratin Tax_Id=9606 Gene_Symbol=KRT6C Keratin, type II cytoskeletal 6C		26	1	20	20	18	17	19	15	21	19	21	22	18	21	17	17	15	9	12	12	18	18	9	8	16			+	0	0	0	0	0	0	0	0	0	0	0	0	0	0	0	0	0	0
1558	Q7ZTS4;Q6NYL7	>sp|Q7ZTS4|K1C18_DANRE Keratin, type I cytoskeletal 18 OS=Danio rerio GN=krt18 PE=1 SV=2		26	23	1	4	4	4	3	7	18	17	16	23	22	23	23	22	13	13	8	16	21	16	18	11	18				0	0	0	476760	0	765480	8732700	4752400	6546600	51709000	44288000	46752000	40783000	34816000	7477600	6222400	2940200	18109000
219	B3DFV8	>tr|B3DFV8|B3DFV8_DANRE Coagulation factor C homolog, cochlin (Limulus polyphemus) OS=Danio rerio GN=coch PE=2 SV=1		26	26	21	11	17	21	17	18	25	23	20	22	22	25	6	4	17	25	22	22	23	19	4	5	5				20407000	31724000	32734000	9537800	12238000	10498000	50507000	42284000	42725000	30159000	26796000	35735000	1055800	516020	133770000	126700000	65635000	80316000
282	B8JI90	>tr|B8JI90|B8JI90_DANRE Novel protein similar to vertebrate collagen, type VI, alpha 3 (COL6A3) (Fragment) OS=Danio rerio GN=col6a3 PE=4 SV=1		26	26	13	10	11	12	15	18	13	14	11	14	15	18	18	18	18	24	20	22	24	23	22	21	22				1598600	2087200	1910000	3361300	3060600	3744600	4029300	3682400	2494300	3160500	3940100	5486500	13937000	15844000	19518000	24176000	14855000	32757000
953	F1QUN8;Q6IQL9;Q6IQR3;Q6DHS1	>tr|F1QUN8|F1QUN8_DANRE Uncharacterized protein OS=Danio rerio GN=acta1a PE=3 SV=1;>tr|Q6IQL9|Q6IQL9_DANRE Novel actin protein OS=Danio rerio GN=RP71-1C22.1 PE=2 SV=1;>tr|Q6IQR3|Q6IQR3_DANRE Actin, alpha, cardiac muscle 1a OS=Danio rerio GN=actc1a PE=2 SV=		26	1	17	17	19	26	26	25	24	24	21	22	23	24	19	20	20	19	23	16	19	18	17	18	16				0	0	0	0	0	0	0	0	0	0	0	0	0	0	0	0	0	0
963	F1QV32	>tr|F1QV32|F1QV32_DANRE Uncharacterized protein (Fragment) OS=Danio rerio GN=si:dkey-121a11.10 PE=4 SV=1		26	2	3	3	3	22	23	24	4	1	0	1	0	0	0	0	0	0	1	1	0	0	0	0	1				70035000	688560	791060	31735000	41557000	32206000	689540	0	0	0	0	0	0	0	0	0	0	0
973	F1QX13	>tr|F1QX13|F1QX13_DANRE Uncharacterized protein OS=Danio rerio GN=c3c PE=4 SV=1		26	10	13	13	16	25	24	23	18	19	18	19	19	22	21	16	14	14	12	16	16	15	11	11	12				161080	310060	174060	1485000	1648200	1881600	793420	501860	445000	1273000	1154400	872950	509440	665060	313390	664350	0	515530
1515	Q6XNL8	>tr|Q6XNL8|Q6XNL8_DANRE Actin OS=Danio rerio GN=acta1b PE=2 SV=1		26	1	17	17	19	26	26	25	24	25	21	22	24	25	19	20	20	19	24	16	19	18	16	18	16				0	0	0	0	0	0	0	0	0	0	0	0	0	0	0	0	55108	0
1648	Q9I8V1	>tr|Q9I8V1|Q9I8V1_DANRE Actin, alpha 1, skeletal muscle OS=Danio rerio GN=actc1b PE=2 SV=1		26	0	18	17	20	26	26	25	25	25	22	23	24	25	20	21	20	20	24	17	20	19	17	19	17				68029000	65208000	71368000	296670000	284820000	252130000	107850000	135270000	157190000	140790000	158140000	207700000	61366000	55175000	257330000	381300000	346460000	29416000
327	CON__P13647	>P13647 SWISS-PROT:P13647|KRT5_Keratin Tax_Id=9606 Gene_Symbol=KRT5 Keratin, type II cytoskeletal 5		25	12	18	21	20	18	18	13	20	17	22	22	19	21	22	20	18	10	13	16	16	17	11	8	18			+	8731300	13429000	8880800	1717100	1821700	1159800	6507600	5608700	13344000	8503400	7398800	7844000	5211000	4595100	12271000	3061500	2710800	4688100
346	CON__QQ8IUT8;CON__PO76011	>QQ8IUT8 TREMBL:Q8IUT8|Type I hair keratin 4 - Homo sapiens (Human).;>PO76011 SWISS-PROT:O76011|HA4_Keratin, type I cuticular HA4 (Hair keratin, type I HA4)		25	9	1	10	25	6	6	2	3	10	5	2	14	13	8	7	6	2	2	9	5	2	4	3	4			+	0	0	28339000	42651	0	0	0	0	0	0	256150	198920	0	0	0	0	0	0
1169	O42364;E9QBB8	>sp|O42364|APOEB_DANRE Apolipoprotein Eb OS=Danio rerio GN=apoeb PE=2 SV=1;>tr|E9QBB8|E9QBB8_DANRE Uncharacterized protein OS=Danio rerio GN=apoeb PE=4 SV=1		25	25	14	11	14	19	19	23	20	22	20	22	22	22	24	22	18	20	17	19	15	16	16	20	19				7212600	6870500	7872700	33292000	25262000	40570000	37586000	35973000	28519000	69633000	48258000	41688000	213270000	193980000	38949000	35476000	38792000	55947000
351	D6MUD3;F1QVM5;B0V313;F1R918	>tr|D6MUD3|D6MUD3_DANRE Collagen type XI alpha-1b OS=Danio rerio GN=COL11A1b PE=2 SV=1;>tr|F1QVM5|F1QVM5_DANRE Uncharacterized protein (Fragment) OS=Danio rerio GN=col11a1b PE=4 SV=1		25	21	10	8	10	18	18	15	19	19	19	21	22	21	19	21	14	15	16	16	14	19	12	12	17				12227000	18707000	11457000	81164000	58253000	109510000	152010000	72219000	58370000	250490000	196640000	177520000	166500000	165500000	179590000	114870000	147350000	234150000
712	F1QAU9;F1RD95	>tr|F1QAU9|F1QAU9_DANRE Uncharacterized protein (Fragment) OS=Danio rerio GN=CABZ01076173.1 PE=4 SV=1;>tr|F1RD95|F1RD95_DANRE Uncharacterized protein (Fragment) OS=Danio rerio GN=CABZ01076173.1 PE=4 SV=1		25	23	0	0	0	2	0	0	7	3	1	21	23	21	17	14	10	7	1	9	19	20	18	16	17				0	0	0	267370	0	0	261400	93335	0	8443000	8827400	10212000	1866900	1911600	1127200	463170	0	1161400
745	F1QCT5;Q1LXE7;F1QSY4	>tr|F1QCT5|F1QCT5_DANRE Uncharacterized protein (Fragment) OS=Danio rerio GN=si:dkey-121a11.10 PE=4 SV=1;>tr|Q1LXE7|Q1LXE7_DANRE Novel protein similar to vertebrate laminin, alpha 3 (LAMA3) (Fragment) OS=Danio rerio GN=si:dkey-121a11.10 PE=4 SV=1;>tr|F1QSY		25	1	3	3	3	21	22	23	4	1	0	1	0	0	0	0	0	0	1	1	0	0	0	0	1				0	0	0	0	0	345310	0	0	0	0	0	0	0	0	0	0	0	0
821	F1QHR0;E9QER8	>tr|F1QHR0|F1QHR0_DANRE Uncharacterized protein OS=Danio rerio GN=apoa4 PE=4 SV=1;>tr|E9QER8|E9QER8_DANRE Uncharacterized protein OS=Danio rerio GN=apoa4 PE=4 SV=1		25	1	12	12	10	23	22	22	18	17	14	18	18	20	21	21	17	21	22	22	14	18	17	21	21				0	110070	0	0	0	0	0	0	0	0	0	0	0	0	0	0	0	0
1275	Q58ED3	>tr|Q58ED3|Q58ED3_DANRE Sushi-repeat-containing protein OS=Danio rerio GN=srpx PE=2 SV=1		25	25	21	20	20	22	22	21	22	23	22	21	21	21	23	22	19	20	18	17	20	17	15	17	16				47182000	49367000	44575000	62722000	69176000	65656000	62185000	34081000	43709000	51860000	38590000	32941000	28199000	31608000	29869000	30926000	27350000	40557000
24	A2BGB3;O42363	>tr|A2BGB3|A2BGB3_DANRE Apolipoprotein A-I OS=Danio rerio GN=apoa1 PE=4 SV=1;>sp|O42363|APOA1_DANRE Apolipoprotein A-I OS=Danio rerio GN=apoa1 PE=2 SV=1		24	24	19	17	18	20	21	22	20	19	19	21	20	21	19	22	20	20	21	20	16	18	15	19	18				17765000	15435000	17543000	158900000	78871000	179600000	87541000	49239000	31914000	123940000	125260000	81634000	149050000	136380000	51679000	78757000	80597000	182530000
136	A8WG05;Q7ZVF9;Q7ZVI7;E9QD59;E9QH14;F1QC15;E9QBP3;E9QBT8	>tr|A8WG05|A8WG05_DANRE Bactin2 protein OS=Danio rerio GN=bactin2 PE=2 SV=1;>sp|Q7ZVF9|ACTB2_DANRE Actin, cytoplasmic 2 OS=Danio rerio GN=actbb PE=2 SV=2;>sp|Q7ZVI7|ACTB1_DANRE Actin, cytoplasmic 1 OS=Danio rerio GN=actba PE=2 SV=2;>tr|E9QD59|E9QD59_DANRE		24	9	18	19	20	23	22	22	22	21	21	22	23	22	17	20	17	19	23	15	21	18	17	19	16				35296000	23785000	40966000	23883000	25508000	22566000	12585000	21376000	19967000	18658000	16331000	33036000	15125000	12653000	13203000	14348000	8053800	6144400
223	B3DHC5;E9QJQ2;E9QCH4	>tr|B3DHC5|B3DHC5_DANRE Uncharacterized protein OS=Danio rerio GN=zgc:194131 PE=2 SV=1;>tr|E9QJQ2|E9QJQ2_DANRE Uncharacterized protein OS=Danio rerio GN=zgc:194131 PE=4 SV=1;>tr|E9QCH4|E9QCH4_DANRE Uncharacterized protein OS=Danio rerio GN=zgc:194131 PE=4		24	3	9	8	9	22	21	22	20	19	15	20	22	20	22	22	19	21	22	23	17	19	19	22	21				0	0	0	2525700	1235000	3494100	1832200	1866000	820950	2610400	3180400	3016600	5428000	5714700	3717700	6945900	5257800	14600000
240	B6IDE7;D7PS91;B6IDE6;F1QAF5	>tr|B6IDE7|B6IDE7_DANRE Frem2b OS=Danio rerio GN=frem2b PE=2 SV=1		24	23	14	15	17	20	21	21	9	8	6	1	0	2	21	21	1	2	1	0	1	0	3	1	3				7371200	7428800	5255900	3793100	4518900	3035400	615890	612550	702990	0	0	356550	5326500	5282000	0	208840	0	0
402	E7F2E3	>tr|E7F2E3|E7F2E3_DANRE Uncharacterized protein OS=Danio rerio GN=mfi2 PE=4 SV=1		24	24	22	21	20	16	21	18	14	20	14	12	11	11	11	11	9	8	4	6	10	13	13	7	8				23514000	22287000	17683000	2628100	2953100	1425900	3763400	6968800	6986800	2059000	1860200	1603200	1938600	2392300	3448500	1556700	523320	1316900
540	E7FES0	>tr|E7FES0|E7FES0_DANRE Uncharacterized protein OS=Danio rerio GN=CABZ01088936.1 PE=4 SV=1		24	24	21	20	22	24	21	24	21	22	19	21	22	21	21	21	18	13	15	17	14	17	10	12	13				211720000	230900000	230400000	693560000	412420000	727180000	125330000	129160000	100170000	286530000	202220000	248390000	320110000	378510000	62444000	98380000	115910000	110590000
1117	F1R9Y1;F1QVG7;E9QH60;E9QG40	>tr|F1R9Y1|F1R9Y1_DANRE Uncharacterized protein OS=Danio rerio GN=col14a1 PE=4 SV=1;>tr|F1QVG7|F1QVG7_DANRE Uncharacterized protein (Fragment) OS=Danio rerio GN=col14a1 PE=4 SV=1		24	23	6	3	4	12	14	14	6	7	6	5	6	9	21	20	15	17	10	16	20	15	17	18	18				639640	994390	820460	1496200	1187500	2520200	1095100	1277200	1415000	1712500	1417000	1513200	21573000	28767000	10967000	10967000	6093700	11920000
1609	Q804G7	>tr|Q804G7|Q804G7_DANRE Annexin 4 OS=Danio rerio GN=anxa4 PE=2 SV=1		24	24	20	19	19	19	17	18	18	20	18	12	14	14	12	15	9	6	5	5	8	9	9	9	8				27275000	21921000	28043000	22165000	35918000	23734000	9298800	22719000	17632000	5377600	8899400	10084000	13011000	7290200	3503600	4216200	1210300	1775400
465	E7F8A7	>tr|E7F8A7|E7F8A7_DANRE Uncharacterized protein OS=Danio rerio GN=BX936443.1 PE=3 SV=1		23	23	17	15	13	17	19	17	17	17	18	19	18	19	20	20	12	16	17	17	21	16	18	16	17				38779000	45407000	37339000	78749000	65022000	63290000	117530000	87021000	63827000	136890000	127560000	163570000	429940000	436970000	112640000	110950000	87384000	130910000
508	E7FBX2;F1QNI0	>tr|E7FBX2|E7FBX2_DANRE Uncharacterized protein OS=Danio rerio GN=CU929340.2 PE=4 SV=1		23	20	13	18	11	4	2	2	22	17	17	17	0	0	1	0	0	1	1	1	1	1	0	0	2				4203800	5931800	3925100	323540	699280	950330	28624000	11146000	9060600	5512600	0	0	0	0	0	0	0	0
592	E9QF07;E9QGC3;E7F522	>tr|E9QF07|E9QF07_DANRE Uncharacterized protein OS=Danio rerio GN=myh7bb PE=4 SV=1;>tr|E9QGC3|E9QGC3_DANRE Uncharacterized protein OS=Danio rerio GN=FP015790.5 PE=4 SV=1		23	3	9	7	9	17	21	16	16	18	18	17	18	17	15	17	14	17	16	9	11	12	16	12	12				0	0	0	0	39590	0	0	57064	0	0	0	0	0	0	0	0	0	0
843	F1QJD1;F1R2V3	>tr|F1QJD1|F1QJD1_DANRE Uncharacterized protein (Fragment) OS=Danio rerio GN=si:dkey-7f3.15 PE=4 SV=1;>tr|F1R2V3|F1R2V3_DANRE Uncharacterized protein (Fragment) OS=Danio rerio GN=si:dkey-7f3.15 PE=4 SV=1		23	1	8	9	9	20	19	20	17	17	13	20	21	19	20	21	17	19	20	20	15	18	19	19	18				0	0	0	0	0	0	0	0	0	0	0	0	0	0	5332000	0	0	0
1222	Q1LYI5	>tr|Q1LYI5|Q1LYI5_DANRE Novel collagen protein OS=Danio rerio GN=si:ch211-106n13.3 PE=2 SV=1		23	22	16	17	17	9	13	10	14	15	14	11	12	17	21	20	11	11	12	12	16	10	11	9	11				20289000	26056000	19391000	6809000	5519000	5009500	13352000	10163000	7901800	8585100	11332000	12865000	189610000	205070000	12587000	10706000	5684300	5525600
1443	Q6P3J5;Q1LYG5;F1RBB9;Q1LYG6	>tr|Q6P3J5|Q6P3J5_DANRE Eukaryotic translation elongation factor 2 OS=Danio rerio GN=eef2b PE=2 SV=1		23	12	19	19	20	14	17	15	12	13	14	12	14	18	8	10	2	2	3	2	8	3	4	5	1				56680000	18872000	41232000	5526400	6736500	7120600	2740000	4293900	2777000	1943200	4262600	5668100	4162500	5856500	0	0	1836400	0
209	B0UYS0;F1QM30;F1QM28	>tr|B0UYS0|B0UYS0_DANRE Keratin 15 OS=Danio rerio GN=krt15 PE=4 SV=1;>tr|F1QM30|F1QM30_DANRE Uncharacterized protein (Fragment) OS=Danio rerio GN=krt15 PE=4 SV=1;>tr|F1QM28|F1QM28_DANRE Uncharacterized protein (Fragment) OS=Danio rerio GN=krt15 PE=4 SV=1		22	19	1	1	1	3	2	1	9	4	2	19	20	21	16	15	4	8	4	2	8	11	16	15	18				0	0	0	469000	401690	0	3961600	4645600	5036800	69236000	44644000	54579000	8113000	7602600	4085000	1208000	646390	523460
477	E7F9A0	>tr|E7F9A0|E7F9A0_DANRE Uncharacterized protein OS=Danio rerio GN=CU207219.1 PE=4 SV=1		22	22	11	9	9	20	20	20	11	10	8	9	10	9	0	2	0	2	0	1	0	0	4	1	0				1210300	2810300	1822500	24480000	20256000	23086000	1934900	1946300	1800800	1711300	1152000	1175900	0	232710	0	138230	0	0
534	E7FE47	>tr|E7FE47|E7FE47_DANRE Uncharacterized protein OS=Danio rerio GN=BX640508.1 PE=4 SV=1		22	22	7	7	8	9	8	9	18	19	18	21	21	18	18	19	18	18	19	21	17	17	15	14	19				11041000	14795000	5639600	8298400	10366000	6530500	147900000	108960000	89160000	296650000	242970000	139140000	141920000	169230000	202860000	129750000	224650000	418670000
569	E9QG93;E9QD79;E9QBV1;E7FBE5;F1R4U8	>tr|E9QG93|E9QG93_DANRE Uncharacterized protein OS=Danio rerio GN=cltcb PE=4 SV=1;>tr|E9QD79|E9QD79_DANRE Uncharacterized protein OS=Danio rerio GN=cltcb PE=4 SV=1;>tr|E9QBV1|E9QBV1_DANRE Uncharacterized protein OS=Danio rerio GN=cltcb PE=4 SV=1		22	2	16	16	17	13	13	10	15	19	18	13	14	14	11	12	7	6	2	1	8	3	6	3	1				0	0	0	0	0	0	0	0	0	0	0	0	0	54735	0	0	0	0
652	F1Q6U3	>tr|F1Q6U3|F1Q6U3_DANRE Uncharacterized protein (Fragment) OS=Danio rerio GN=ttnb PE=4 SV=1		22	20	2	1	0	14	15	14	8	9	11	11	15	17	9	6	11	15	6	1	3	2	3	1	0				0	0	0	3426400	4924800	4644400	4087200	2395300	3014800	1828000	3739000	6600300	3356500	2871100	4104600	4271100	2302000	0
871	F1QLC3;F1QL87	>tr|F1QLC3|F1QLC3_DANRE Uncharacterized protein OS=Danio rerio GN=f10 PE=3 SV=1;>tr|F1QL87|F1QL87_DANRE Uncharacterized protein OS=Danio rerio GN=f10 PE=3 SV=1		22	22	15	13	14	20	18	19	19	19	17	19	19	20	19	19	18	17	16	18	19	20	16	16	19				25515000	37189000	27749000	39470000	48578000	40307000	116850000	72361000	71850000	205380000	140640000	120560000	336670000	348870000	82982000	118900000	218100000	133770000
471	F1QMX8;E7F8M1	>tr|F1QMX8|F1QMX8_DANRE Uncharacterized protein (Fragment) OS=Danio rerio GN=crybb1l1 PE=4 SV=1;>tr|E7F8M1|E7F8M1_DANRE Uncharacterized protein OS=Danio rerio GN=crybb1l1 PE=4 SV=1		22	18	22	20	20	7	7	2	9	12	11	1	2	2	4	4	0	1	0	1	0	0	0	0	0				2157700000	2885600000	1647600000	200980	176060	27483	4112400	9490300	3644300	0	16260	35995	1205000	1356300	0	0	0	0
934	F1QT01;Q90WT1	>tr|F1QT01|F1QT01_DANRE Uncharacterized protein (Fragment) OS=Danio rerio GN=crybb1 PE=4 SV=1;>tr|Q90WT1|Q90WT1_DANRE Beta B1-crystallin OS=Danio rerio GN=crybb1 PE=2 SV=1		22	22	22	20	19	9	7	7	12	17	14	4	2	3	10	11	1	0	0	1	0	3	1	1	0				1841900000	3886700000	1573100000	467550	351480	84669	2656900	16168000	3521800	69752	31250	138740	1011700	963270	0	0	0	0
1139	F1RCB6	>tr|F1RCB6|F1RCB6_DANRE Uncharacterized protein OS=Danio rerio GN=zgc:86725 PE=3 SV=1		22	1	15	14	16	21	21	21	20	20	17	18	19	22	16	16	16	16	20	13	17	14	14	16	13				0	0	0	0	0	0	0	0	0	0	0	0	0	0	0	0	0	0
1214	Q1LXA7;Q1LXA6	>tr|Q1LXA7|Q1LXA7_DANRE Biglycan-like protein 3 OS=Danio rerio GN=aspn PE=2 SV=1;>tr|Q1LXA6|Q1LXA6_DANRE Biglycan-like protein 3 OS=Danio rerio GN=aspn PE=2 SV=1		22	22	13	14	13	18	17	18	17	21	18	17	18	15	16	18	16	17	15	18	17	14	16	18	19				12685000	11059000	18618000	52102000	67966000	91229000	58688000	62353000	58459000	128870000	80582000	88976000	117060000	108440000	48944000	99588000	73382000	49469000
1377	Q6GMI0	>tr|Q6GMI0|Q6GMI0_DANRE HtrA serine peptidase 1 OS=Danio rerio GN=htra1a PE=2 SV=1		22	14	0	5	3	18	16	18	17	18	12	18	15	18	20	20	12	14	15	17	19	15	20	16	18				0	482340	1031500	3076800	2103200	4852900	1356300	1137500	783850	3022800	2711700	4970800	19236000	23037000	2992500	5136400	2861100	8180600
260	B8A4V2;Q7T391	>tr|B8A4V2|B8A4V2_DANRE Annexin A11a OS=Danio rerio GN=anxa11a PE=3 SV=1;>tr|Q7T391|Q7T391_DANRE Annexin A11a OS=Danio rerio GN=anxa11a PE=2 SV=1		21	21	19	19	20	17	19	16	14	17	16	15	13	14	13	15	9	11	5	3	8	5	7	12	5				16536000	12797000	17289000	17742000	13118000	14995000	4521700	9020400	7349100	2546500	2410800	3020100	2093800	2655700	1089500	1710900	1575100	397470
526	E7FD18	>tr|E7FD18|E7FD18_DANRE Uncharacterized protein OS=Danio rerio GN=CR555298.1 PE=4 SV=1		21	1	6	6	7	14	16	12	15	15	16	13	13	14	13	14	11	13	13	5	8	10	12	10	8				0	0	0	0	0	0	0	0	0	0	0	0	0	0	0	0	0	0
538	E7FEN9	>tr|E7FEN9|E7FEN9_DANRE Uncharacterized protein OS=Danio rerio GN=CU467964.2 PE=4 SV=1		21	20	3	4	3	0	1	1	3	3	4	0	1	2	17	18	10	15	10	3	8	8	17	16	20				307360	117270	368050	0	0	0	248710	395720	286210	0	0	0	12528000	10396000	3105100	3798400	1732600	925540
870	F1QKX8;F1QD37	>tr|F1QKX8|F1QKX8_DANRE Uncharacterized protein (Fragment) OS=Danio rerio GN=lamb2l PE=4 SV=1		21	21	12	10	13	16	17	17	10	11	10	2	2	2	0	1	1	1	0	1	1	1	0	0	1				4634400	1821600	2163700	18478000	7324200	9905000	1629500	2163500	2847800	0	467410	170190	0	0	0	0	0	0
1137	Q66I42;F1RBZ9;F1RDD4	>tr|Q66I42|Q66I42_DANRE Radixin OS=Danio rerio GN=msna PE=2 SV=1;>tr|F1RBZ9|F1RBZ9_DANRE Uncharacterized protein (Fragment) OS=Danio rerio GN=msna PE=4 SV=1		21	17	16	10	12	16	17	15	17	15	15	14	13	16	15	18	12	16	16	13	16	12	13	11	11				7785400	5945000	8507600	5461900	6851400	5706500	2768100	4132400	2751500	3527800	3204600	4315800	3970100	4080000	9714600	7786500	10613000	8227600
1466	Q6PBW5	>tr|Q6PBW5|Q6PBW5_DANRE Retinal pigment epithelium 65a OS=Danio rerio GN=rpe65a PE=2 SV=1		21	21	19	18	19	1	1	1	2	3	3	1	1	2	2	1	1	0	0	0	0	0	2	1	0				138350000	76640000	140840000	0	0	0	13404	77070	63873	0	0	82238	31235	0	0	0	0	0
325	CON__P08779	>P08779 SWISS-PROT:P08779|KRT16_Keratin Tax_Id=9606 Gene_Symbol=KRT16 Keratin, type I cytoskeletal 16		20	8	14	14	12	13	11	11	15	14	12	14	15	17	14	14	15	11	11	9	12	15	9	6	13			+	7703100	16586000	4249000	2703900	3688600	2432400	12544000	7819200	8907700	15587000	5385700	9664300	4961800	5141800	16197000	1626100	6637200	6151500
142	A9C3Q4;A9C3Q5	>tr|A9C3Q4|A9C3Q4_DANRE ATPase, Ca++ transporting, cardiac muscle, slow twitch 2a OS=Danio rerio GN=atp2a2a PE=3 SV=1;>tr|A9C3Q5|A9C3Q5_DANRE ATPase, Ca++ transporting, cardiac muscle, slow twitch 2a OS=Danio rerio GN=atp2a2a PE=3 SV=1		20	3	12	10	10	12	13	12	14	16	15	12	13	15	13	13	12	18	16	5	5	4	15	15	10				1798400	721350	2875200	713700	1192400	420080	662620	4110500	3552600	259290	687740	546210	544460	622610	3076700	1251300	1192700	0
173	B0S5Q5	>tr|B0S5Q5|B0S5Q5_DANRE ATPase, Na+/K+ transporting, alpha 2a polypeptide OS=Danio rerio GN=atp1a2a PE=2 SV=1		20	4	14	12	13	14	16	13	13	17	15	10	14	14	12	10	7	7	4	1	4	1	8	4	3				0	0	0	0	464990	542430	0	371620	401990	155310	242250	392550	131480	0	306470	267850	0	0
507	E7FBW8;E9QHG4;E9QFH9	>tr|E7FBW8|E7FBW8_DANRE Uncharacterized protein OS=Danio rerio GN=hapln1b PE=4 SV=1;>tr|E9QHG4|E9QHG4_DANRE Uncharacterized protein OS=Danio rerio GN=hapln1b PE=4 SV=1		20	18	18	16	15	16	14	13	16	17	14	11	9	10	8	9	8	6	4	7	6	8	8	9	7				276610000	407330000	211940000	36221000	35778000	30448000	106340000	77983000	102590000	17090000	9155100	9970000	18174000	21909000	13643000	18632000	7796600	8460400
641	F1Q5S2;F1Q6I8	>tr|F1Q5S2|F1Q5S2_DANRE Uncharacterized protein OS=Danio rerio GN=zgc:152997 PE=3 SV=1		20	20	12	10	11	16	16	16	15	13	11	16	14	17	16	16	14	16	17	16	18	17	15	14	15				3311700	4900800	3179900	21776000	21699000	21410000	8051500	6578100	7011400	15031000	10569000	11594000	24656000	31442000	30907000	30045000	31365000	80129000
669	F1Q7N1;F1Q4S4	>tr|F1Q7N1|F1Q7N1_DANRE Uncharacterized protein (Fragment) OS=Danio rerio GN=ch1073-291c23.1 PE=4 SV=1;>tr|F1Q4S4|F1Q4S4_DANRE Uncharacterized protein OS=Danio rerio GN=OTTDARG00000029349 PE=4 SV=1		20	20	8	8	6	4	5	4	13	11	10	11	9	11	14	14	11	14	12	13	16	13	10	14	13				5067100	764750	1986100	1681100	3714600	868800	4311300	2398200	2542000	2342900	1794200	2223400	10703000	8998300	19781000	12492000	9419100	23672000
810	F1QH93	>tr|F1QH93|F1QH93_DANRE Uncharacterized protein OS=Danio rerio GN=matn3a PE=4 SV=1		20	0	5	3	5	16	16	17	8	5	2	15	16	17	13	13	3	5	0	14	10	12	8	5	7				1160000	663610	2861500	90257000	70668000	77978000	2653000	763820	229190	33841000	21278000	31000000	9494200	8572800	837720	1425900	0	7341200
1123	F1RAG3	>tr|F1RAG3|F1RAG3_DANRE Uncharacterized protein (Fragment) OS=Danio rerio GN=nid1a PE=4 SV=1		20	6	7	7	7	19	18	20	10	7	5	6	4	6	3	1	8	8	5	7	8	4	13	10	6				2562000	3466900	978960	26353000	27280000	28164000	1586700	2094400	2725600	692580	469020	558740	130940	0	4308400	2129400	1215600	2797600
1391	Q6IQJ2;Q6P5M9	>tr|Q6IQJ2|Q6IQJ2_DANRE Novel protein (Zgc:55461) OS=Danio rerio GN=DKEY-2N12.2 PE=2 SV=1;>tr|Q6P5M9|Q6P5M9_DANRE Tubulin, beta 2c OS=Danio rerio GN=tubb2c PE=2 SV=1		20	2	17	16	14	14	12	13	17	18	17	18	16	17	15	15	13	13	11	10	18	16	14	13	11				16849000	11830000	17002000	4651400	3132100	5334600	15337000	27872000	19445000	14845000	19460000	20711000	9403300	10964000	9771700	9670600	6476800	3094700
1410	Q6NWK7;B8A518;B8A516;F1RER6;F1R6T2	>tr|Q6NWK7|Q6NWK7_DANRE Tuba1 protein OS=Danio rerio GN=tuba1l2 PE=2 SV=1;>tr|B8A518|B8A518_DANRE Novel protein similar to vertebrate tuba1l, tubulin, alpha 1, like (Tuba1l) OS=Danio rerio GN=tuba1l PE=3 SV=1;>tr|B8A516|B8A516_DANRE Tubulin, alpha 1 OS=Dan		20	1	16	14	14	15	14	16	13	16	13	13	14	17	11	12	9	16	10	7	11	12	10	11	11				47143000	53678000	50547000	9389200	10344000	8150300	25152000	55336000	50100000	27884000	27726000	32802000	13793000	13268000	17671000	13895000	6558300	6332100
1453	Q6P603	>tr|Q6P603|Q6P603_DANRE Annexin A2a OS=Danio rerio GN=anxa2a PE=2 SV=1		20	20	17	14	14	20	20	19	16	19	15	18	17	17	13	14	14	12	9	13	14	12	13	15	13				13761000	7841600	20809000	17512000	14087000	18740000	8694700	12937000	11426000	30371000	24210000	39132000	12942000	15766000	4328500	9296200	4707800	6016300
1520	Q6ZM60	>tr|Q6ZM60|Q6ZM60_DANRE Novel protein similar to vertebrate ATPase, Ca++ transporting, cardiac muscle, slow twitch 2 (ATP2A2) OS=Danio rerio GN=atp2a2b PE=2 SV=1		20	3	13	11	12	14	14	12	15	16	17	12	15	16	13	12	11	16	15	6	6	4	14	13	9				397540	0	633640	1768200	906460	0	864350	1399500	3854600	0	655820	611770	0	0	0	0	0	0
161	B0R197;F1QJ11;F1R5X8;B0R198	>tr|B0R197|B0R197_DANRE Novel protein similar to H.sapiens VDAC3, voltage-dependent anion channel 3 (VDAC3, zgc:77898) OS=Danio rerio GN=CH211-220D9.2 PE=4 SV=1;>tr|F1QJ11|F1QJ11_DANRE Uncharacterized protein OS=Danio rerio GN=vdac3 PE=4 SV=1;>tr|F1R5X8|F1		19	18	17	13	13	19	17	18	11	12	12	11	9	12	7	9	4	8	5	3	6	8	10	6	9				40049000	33736000	27875000	51158000	42288000	40204000	23340000	36291000	23253000	10302000	11646000	17963000	11482000	15551000	13425000	5253200	1700600	1132100
292	B8JKW4;F1QT13;F1Q4X5;F1QI93	>tr|B8JKW4|B8JKW4_DANRE Novel protein (Sb:cb26) OS=Danio rerio GN=si:dkey-76b14.4 PE=4 SV=1;>tr|F1QT13|F1QT13_DANRE Uncharacterized protein (Fragment) OS=Danio rerio GN=si:dkey-76b14.4 PE=4 SV=1		19	16	5	6	4	17	18	16	7	9	4	11	10	11	10	5	8	8	5	9	10	11	9	8	7				225970	370900	0	3275300	1948900	3861400	490380	333910	835540	723890	776490	1138400	396420	381130	909420	1125000	914530	1438000
400	E7F244	>tr|E7F244|E7F244_DANRE Uncharacterized protein OS=Danio rerio GN=CU659670.1 PE=3 SV=1		19	0	15	13	13	14	13	15	13	16	12	13	14	16	11	12	9	15	10	8	11	12	10	11	12				0	0	0	0	0	0	0	0	0	0	0	0	0	0	0	0	0	0
432	E7F537;F1Q788	>tr|E7F537|E7F537_DANRE Uncharacterized protein OS=Danio rerio GN=acana PE=4 SV=1		19	19	12	14	13	12	11	14	17	17	17	14	13	13	15	16	14	14	12	16	14	15	14	13	14				17846000	17479000	15557000	14420000	9833400	13996000	113290000	35007000	29599000	11596000	10577000	8388900	16450000	19721000	9676800	24084000	10163000	15624000
639	F1Q5N7;F1REH4	>tr|F1Q5N7|F1Q5N7_DANRE Uncharacterized protein OS=Danio rerio GN=si:ch211-212d10.4 PE=4 SV=1;>tr|F1REH4|F1REH4_DANRE Uncharacterized protein (Fragment) OS=Danio rerio GN=si:ch211-212d10.4 PE=4 SV=1		19	18	1	2	2	5	3	5	7	7	3	15	15	16	8	5	7	13	8	13	16	16	12	12	11				0	199070	65946	989040	1507200	3179300	1306500	896590	328070	6698700	5240000	5647800	1016100	801020	6732200	6444700	1954900	20361000
699	F1Q9R1	>tr|F1Q9R1|F1Q9R1_DANRE Uncharacterized protein OS=Danio rerio GN=anxa11b PE=3 SV=1		19	18	16	15	15	14	17	16	10	14	12	12	10	10	7	10	4	10	6	2	6	6	6	7	7				19384000	14523000	22276000	7143200	6936300	5351400	5288500	10624000	9612900	2491900	2845500	3854700	3053200	2446100	1045900	936120	1002900	308570
852	F1QJS8	>tr|F1QJS8|F1QJS8_DANRE Uncharacterized protein (Fragment) OS=Danio rerio GN=si:dkey-65b12.6 PE=4 SV=1		19	0	14	12	15	0	0	0	17	17	18	0	3	1	9	5	4	5	6	0	0	0	0	0	0				0	0	0	0	0	0	2609300	3178000	7269300	0	0	0	0	0	0	0	0	0
1119	F1RA14	>tr|F1RA14|F1RA14_DANRE Uncharacterized protein (Fragment) OS=Danio rerio GN=CU633999.1 PE=4 SV=1		19	18	1	0	1	3	2	3	4	1	3	6	9	11	13	14	10	12	10	9	17	12	13	12	14				0	0	0	571180	0	259740	338630	0	267190	1277800	654960	1592900	7892400	10232000	2527300	3791300	2421900	3500200
1339	Q68EK6	>tr|Q68EK6|Q68EK6_DANRE Matn3a protein OS=Danio rerio GN=matn3a PE=2 SV=1		19	1	5	3	5	17	17	16	8	5	2	16	16	17	14	12	3	5	1	11	7	10	7	5	7				0	0	0	2080500	2415200	0	0	0	0	2480700	1165700	995040	470920	0	0	0	0	0
1394	Q6IQU2	>tr|Q6IQU2|Q6IQU2_DANRE Beta A2-crystallin OS=Danio rerio GN=cryba2a PE=2 SV=1		19	14	18	18	17	4	2	3	9	12	9	0	0	0	2	2	0	2	1	0	1	0	0	0	0				285480000	622270000	251560000	24100	13145	18048	216790	2046300	306750	0	0	0	94378	99716	0	51930	0	0
1445	Q6P3L3	>tr|Q6P3L3|Q6P3L3_DANRE Heat shock protein 5 OS=Danio rerio GN=hspa5 PE=2 SV=1		19	17	18	16	16	16	17	18	18	17	18	18	19	19	18	16	14	15	14	15	15	16	13	16	11				10999000	12972000	10956000	12808000	13027000	14884000	8474900	7059100	7839700	20381000	14461000	13780000	21894000	21652000	8699300	9861300	9731600	12481000
406	E9QDD7;E7F2X5	>tr|E9QDD7|E9QDD7_DANRE Uncharacterized protein OS=Danio rerio GN=si:dkey-27b3.5 PE=3 SV=1;>tr|E7F2X5|E7F2X5_DANRE Uncharacterized protein OS=Danio rerio GN=OTTDARG00000030873 PE=3 SV=1		18	18	1	3	1	18	18	17	8	10	10	4	1	6	3	1	7	9	3	3	2	3	9	4	2				0	117630	0	25084000	18661000	12969000	728010	938390	1035900	71709	0	231580	53873	0	260050	887610	61252	95526
768	F1QEH9;F1RBW2;F1R6Y8	>tr|F1QEH9|F1QEH9_DANRE Uncharacterized protein OS=Danio rerio GN=zgc:123194 PE=3 SV=1;>tr|F1RBW2|F1RBW2_DANRE Uncharacterized protein (Fragment) OS=Danio rerio GN=zgc:123194 PE=3 SV=1;>tr|F1R6Y8|F1R6Y8_DANRE Uncharacterized protein OS=Danio rerio GN=zgc:1		18	1	15	14	13	13	12	13	16	17	17	16	15	16	15	14	12	13	10	8	17	16	14	13	9				0	0	0	0	0	0	418090	548780	410420	0	356350	420650	156720	0	0	269690	0	0
811	F1QH94	>tr|F1QH94|F1QH94_DANRE Uncharacterized protein OS=Danio rerio GN=matn3a PE=4 SV=1		18	1	5	3	5	16	16	16	8	5	2	14	14	15	12	11	3	5	0	11	7	10	7	5	7				0	0	0	0	0	136190	0	0	0	0	0	0	0	0	0	0	0	0
835	F1QJ32;Q6NWJ5	>tr|F1QJ32|F1QJ32_DANRE Uncharacterized protein OS=Danio rerio GN=tuba8l4 PE=3 SV=1;>tr|Q6NWJ5|Q6NWJ5_DANRE Tubulin alpha 6 OS=Danio rerio GN=tuba8l4 PE=2 SV=1		18	0	16	14	13	14	13	15	13	16	12	14	15	17	11	12	9	15	10	8	12	13	11	12	12				0	0	0	0	0	0	0	0	0	0	0	0	0	0	0	0	0	0
719	F1QJ71;F1QT86;F1QBC8;F1Q7Q3	>tr|F1QJ71|F1QJ71_DANRE Uncharacterized protein OS=Danio rerio GN=si:ch211-198b21.5 PE=4 SV=1;>tr|F1QT86|F1QT86_DANRE Uncharacterized protein (Fragment) OS=Danio rerio GN=si:ch211-198b21.5 PE=4 SV=1;>tr|F1QBC8|F1QBC8_DANRE Uncharacterized protein (Fragment		18	17	8	9	6	15	15	14	17	15	12	18	18	17	17	15	11	10	9	14	11	14	6	9	12				4208000	8521800	10339000	91670000	92054000	120180000	203300000	104920000	42361000	126760000	121870000	88865000	175110000	180160000	113290000	56141000	126730000	75752000
1053	F1R4K1	>tr|F1R4K1|F1R4K1_DANRE Uncharacterized protein OS=Danio rerio GN=TUBB4 (6 of 7) PE=3 SV=1		18	0	15	14	13	12	11	12	15	16	15	16	14	15	14	13	11	12	10	8	16	14	13	12	9				0	0	0	0	0	0	0	0	0	0	0	0	0	0	0	0	262260	0
1289	Q5NJJ7;B7ZD91;E9QF04	>tr|Q5NJJ7|Q5NJJ7_DANRE Matrilin 3b OS=Danio rerio GN=matn3b PE=2 SV=1;>tr|B7ZD91|B7ZD91_DANRE Matrilin 3b OS=Danio rerio GN=matn3b PE=4 SV=1;>tr|E9QF04|E9QF04_DANRE Uncharacterized protein OS=Danio rerio GN=matn3b PE=4 SV=1		18	2	3	2	2	17	17	15	4	2	1	14	12	15	9	15	5	11	0	10	13	9	10	8	12				0	0	0	33994000	22960000	27832000	400160	0	0	12561000	12571000	19201000	5660800	3291700	195320	2700600	0	3092600
1621	Q8JHI0;F1R1Y3;A2CEZ0	>tr|Q8JHI0|Q8JHI0_DANRE Solute carrier family 25 alpha, member 5 OS=Danio rerio GN=slc25a5 PE=2 SV=1		18	12	14	15	11	15	16	18	14	15	15	12	13	13	11	14	13	14	14	9	12	12	11	14	13				80017000	81446000	85692000	57412000	60163000	58808000	41807000	80490000	73494000	15319000	25986000	47338000	26572000	27856000	39561000	59036000	25637000	2782600
97	A7E2K5;F1QN55	>tr|A7E2K5|A7E2K5_DANRE Uncharacterized protein OS=Danio rerio GN=crybb1l2 PE=2 SV=1;>tr|F1QN55|F1QN55_DANRE Uncharacterized protein (Fragment) OS=Danio rerio GN=crybb1l2 PE=4 SV=1		17	2	16	17	16	7	7	2	9	11	8	1	0	4	4	5	1	1	1	1	0	2	1	1	0				684950000	712560000	635240000	171430	22173	15326	404820	8691900	974630	0	0	42230	0	211820	0	0	0	0
166	B0S564	>tr|B0S564|B0S564_DANRE Novel protein similar to vertebrate procollagen-proline, 2-oxoglutarate 4-dioxygenase (Proline 4-hydroxylase), beta polypeptide (Protein disulfide isomerase; thyroid hormone binding protein p55) (P4HB) OS=Danio rerio GN=p4hb PE=3 SV		17	17	9	9	9	12	12	13	14	15	11	17	14	15	16	15	11	12	11	12	14	12	10	9	13				828370	1075400	1632500	2643800	1578700	3306500	3559800	1864500	1584600	6132800	5747000	5982500	5105000	5943000	4076000	6378600	6303200	13171000
263	B8A565;E9QIX6;F1RBU5	>tr|B8A565|B8A565_DANRE Complement component 9 OS=Danio rerio GN=c9 PE=4 SV=1;>tr|E9QIX6|E9QIX6_DANRE Uncharacterized protein OS=Danio rerio GN=c9 PE=4 SV=1		17	17	5	5	5	17	14	15	11	12	11	12	15	13	12	11	7	9	13	12	10	11	11	10	11				779830	1206100	1135800	16383000	9811000	22200000	4863200	3958400	2826700	12886000	8808100	8578300	4996900	5070600	6414800	9216900	7219800	11167000
434	E7F5I3;E9QIF5;F1QM50	>tr|E7F5I3|E7F5I3_DANRE Uncharacterized protein OS=Danio rerio GN=si:dkey-109i21.1 PE=4 SV=1;>tr|E9QIF5|E9QIF5_DANRE Uncharacterized protein OS=Danio rerio GN=si:dkey-109i21.1 PE=4 SV=1		17	16	10	11	10	12	12	13	13	11	9	10	9	10	6	3	15	14	9	16	16	17	14	12	16				2938600	3647900	2558400	1511300	1313500	1436200	1326100	1046200	899460	507940	637720	765880	605480	384740	4955400	3910300	3644400	3828300
748	F1QCY2;Q6DC49;F1QQ90;E7EYT7	>tr|F1QCY2|F1QCY2_DANRE Uncharacterized protein (Fragment) OS=Danio rerio GN=tuba8l3 PE=3 SV=1;>tr|Q6DC49|Q6DC49_DANRE Tubulin alpha 8-like 3a protein OS=Danio rerio GN=tuba8l3 PE=2 SV=1;>tr|F1QQ90|F1QQ90_DANRE Uncharacterized protein OS=Danio rerio GN=si:		17	0	14	11	12	12	12	13	13	14	12	12	13	14	11	11	8	14	9	8	10	11	9	10	11				118430	0	0	0	31467	0	437950	999860	969710	580500	0	0	0	0	0	0	0	0
869	F1QKW3	>tr|F1QKW3|F1QKW3_DANRE Uncharacterized protein OS=Danio rerio GN=lama5 PE=4 SV=1		17	17	10	9	9	16	14	15	9	9	11	2	3	4	1	0	2	4	1	0	3	0	1	0	0				2477900	2154200	1946400	4548700	3741900	5874500	677360	1170900	1008700	624530	167330	231610	0	0	112750	628680	0	0
1108	F1R998	>tr|F1R998|F1R998_DANRE Uncharacterized protein (Fragment) OS=Danio rerio GN=nid1a PE=4 SV=1		17	3	4	4	4	15	14	15	7	7	5	4	3	5	2	1	6	5	5	5	6	3	9	7	7				0	0	0	703800	1695800	0	0	0	0	0	0	0	0	0	0	0	0	0
1084	F1RCV3;F1R7A0;F1QIA2	>tr|F1RCV3|F1RCV3_DANRE Uncharacterized protein OS=Danio rerio GN=slit3 PE=4 SV=1;>tr|F1R7A0|F1R7A0_DANRE Uncharacterized protein OS=Danio rerio GN=slit3 PE=4 SV=1		17	17	5	2	7	17	17	15	4	2	3	13	12	13	5	4	0	0	0	3	7	4	1	0	2				320600	272170	286700	6077700	9909000	8103800	255930	0	193660	1785100	1323500	1558100	393900	334860	0	0	0	162920
1171	O93409;E9QJI5;Q66I73;E9QG51	>tr|O93409|O93409_DANRE Myosin light chain 2 OS=Danio rerio GN=mylz2 PE=2 SV=1;>tr|E9QJI5|E9QJI5_DANRE Uncharacterized protein OS=Danio rerio GN=mylz2 PE=4 SV=1;>tr|Q66I73|Q66I73_DANRE Uncharacterized protein OS=Danio rerio GN=zgc:103639 PE=2 SV=1;>tr|E9QG		17	16	1	3	3	14	11	13	14	12	13	15	16	15	12	10	11	15	15	9	11	10	15	10	6				0	345450	565670	4786300	5146800	8098300	31391000	20585000	27646000	25970000	43305000	62551000	5431800	5127800	24890000	39802000	65261000	5297400
1177	Q08BA1	>tr|Q08BA1|Q08BA1_DANRE ATP synthase subunit alpha OS=Danio rerio GN=atp5a1 PE=2 SV=1		17	17	16	10	14	12	14	11	7	10	9	8	9	9	6	9	6	8	7	5	5	8	9	9	6				13588000	14911000	15198000	16519000	13895000	14747000	8510700	10579000	8813800	5044100	5026000	5815600	3743900	2295500	2001200	6236200	2228000	1114900
855	Q2PMI2;F1QJU3;F1Q6U6	>tr|Q2PMI2|Q2PMI2_DANRE Follistatin-like 2 OS=Danio rerio GN=fstl1b PE=2 SV=1;>tr|F1QJU3|F1QJU3_DANRE Uncharacterized protein OS=Danio rerio GN=fstl1b PE=4 SV=1		17	17	6	5	6	10	11	12	13	10	9	14	16	13	14	13	2	5	8	8	6	8	5	4	4				987160	1237600	565890	10960000	6871300	11467000	21878000	4145500	3624400	40385000	39544000	20454000	42208000	38973000	2102600	2292800	4906900	5103100
1288	Q5NJJ6;E9QF03;Q5NIW0	>tr|Q5NJJ6|Q5NJJ6_DANRE Matrilin 3b OS=Danio rerio GN=matn3b PE=2 SV=1;>tr|E9QF03|E9QF03_DANRE Uncharacterized protein OS=Danio rerio GN=matn3b PE=4 SV=1;>tr|Q5NIW0|Q5NIW0_DANRE Matrilin 3b OS=Danio rerio GN=matn3b PE=2 SV=1		17	1	4	3	2	16	16	15	4	2	1	14	13	14	10	16	5	11	0	10	14	10	9	8	13				0	0	0	0	0	0	0	0	0	0	0	0	0	0	0	0	0	0
1334	Q66I20	>tr|Q66I20|Q66I20_DANRE Uncharacterized protein OS=Danio rerio GN=serpinf1 PE=2 SV=1		17	17	10	9	11	14	12	14	11	13	13	14	13	14	12	13	14	16	16	15	15	13	12	12	14				2564900	3818200	2464400	7392100	8549600	10064000	17360000	12561000	11534000	22475000	17506000	22456000	30794000	33379000	40520000	42392000	32073000	51291000
1401	Q6NW90	>tr|Q6NW90|Q6NW90_DANRE Tubulin, beta 5 OS=Danio rerio GN=tubb5 PE=2 SV=1		17	2	13	13	12	12	12	12	15	15	13	15	14	14	12	12	10	10	8	7	15	11	12	11	9				0	0	0	0	78738	0	273880	690250	0	168190	595150	316130	0	0	0	0	0	0
1423	Q6NYR4;Q90473;Q1LY29;F1RCH9;A5PMG2;F1QGH3;Q1LY27	>tr|Q6NYR4|Q6NYR4_DANRE Heat shock 70kDa protein 8 OS=Danio rerio GN=hspa8 PE=2 SV=1;>sp|Q90473|HSP7C_DANRE Heat shock cognate 71 kDa protein OS=Danio rerio GN=hspa8 PE=2 SV=1;>tr|Q1LY29|Q1LY29_DANRE Heat shock 70kDa protein 8 (Fragment) OS=Danio rerio GN=		17	6	13	14	13	12	12	8	12	14	10	15	15	15	14	14	7	10	5	9	12	12	11	11	10				3262300	9191500	9729000	4680300	2586900	5169500	3764900	3105500	2836800	8580700	6699000	7128400	6935800	7081000	3182500	3199500	1591200	3083900
1613	Q8AWD0;F1R5H1	>tr|Q8AWD0|Q8AWD0_DANRE Uncharacterized protein OS=Danio rerio GN=vdac2 PE=2 SV=1		17	15	14	10	12	16	16	15	13	13	14	14	15	14	13	15	10	13	10	8	7	7	13	12	11				52637000	53547000	44957000	98242000	83661000	84859000	55522000	78761000	68356000	25674000	24766000	40107000	25457000	24869000	30938000	25512000	12570000	4098700
320	CON__P02533	>P02533 SWISS-PROT:P02533|KRT14_Keratin Tax_Id=9606 Gene_Symbol=KRT14 Keratin, type I cytoskeletal 14		16	4	13	15	10	11	10	8	14	12	10	13	13	15	14	12	14	10	9	11	11	12	8	6	10			+	529940	1256700	0	390060	346860	284720	1283000	640390	3498700	3118900	870970	866220	340230	423950	628890	279560	1394700	771880
1362	Q6DGY7	>sp|Q6DGY7|CRGNB_DANRE Gamma-crystallin N-B OS=Danio rerio GN=crygnb PE=2 SV=1		16	15	16	15	15	1	3	0	4	8	6	0	0	1	3	5	0	0	0	0	0	0	0	1	0				1186300000	1131500000	606200000	0	147500	0	651740	5204900	1067100	0	0	0	103980	299240	0	0	0	0
1638	Q92005	>sp|Q92005|EF1A_DANRE Elongation factor 1-alpha OS=Danio rerio GN=eef1a PE=2 SV=1		16	4	13	13	15	14	13	12	13	12	11	12	13	13	13	13	6	7	5	5	10	7	5	8	3				94738000	96555000	134050000	33993000	46492000	33358000	13662000	12393000	9192600	16653000	15473000	20836000	8447600	7013600	4769600	4513300	1861200	7039100
35	A2BIP1;F1Q4P9	>tr|A2BIP1|A2BIP1_DANRE Novel protein similar to vertebrate ATPase, Ca++ transporting, cardiac muscle, fast twitch 1 (ATP2A1) (Fragment) OS=Danio rerio GN=atp2a3 PE=3 SV=1;>tr|F1Q4P9|F1Q4P9_DANRE Uncharacterized protein (Fragment) OS=Danio rerio GN=OTTDARG		16	3	9	9	9	11	11	9	11	13	14	8	12	13	10	10	12	13	11	6	6	3	10	9	5				2777500	1531900	1882400	3792700	7118400	4115700	1335900	4966100	2770200	0	1354800	1523200	1269900	1334500	2647400	2099800	0	0
91	A5WWI5	>tr|A5WWI5|A5WWI5_DANRE Novel protein similar to vertebrate alpha-2-HS-glycoprotein (AHSG) OS=Danio rerio GN=si:ch73-252g14.4 PE=4 SV=1		16	16	12	10	10	13	12	12	13	13	13	13	14	13	14	13	14	15	16	15	13	15	14	15	15				9419400	10006000	8764400	80451000	59199000	160930000	320410000	158220000	74988000	374870000	481160000	498980000	572660000	693460000	555520000	1007100000	1120100000	1176100000
176	B0S5X0;Q5RI46	>tr|B0S5X0|B0S5X0_DANRE Epiphycan OS=Danio rerio GN=epyc PE=4 SV=1;>tr|Q5RI46|Q5RI46_DANRE Epiphycan OS=Danio rerio GN=epyc PE=4 SV=2		16	16	16	14	16	16	14	16	14	13	11	11	12	14	11	11	12	13	12	11	12	13	9	12	9				760830000	548950000	443570000	659670000	605420000	892450000	247720000	220120000	262200000	186860000	103710000	111380000	80933000	64103000	141230000	103870000	82242000	103820000
466	E7F8B2	>tr|E7F8B2|E7F8B2_DANRE Uncharacterized protein OS=Danio rerio GN=BX842614.1 PE=4 SV=1		16	16	1	0	3	1	0	1	6	4	2	15	15	15	13	14	13	10	2	14	13	15	12	12	14				0	0	135040	0	0	0	578700	331510	94569	52634000	49418000	54158000	9924800	9234600	2062000	1523500	0	5029800
498	E7FB25	>tr|E7FB25|E7FB25_DANRE Uncharacterized protein OS=Danio rerio GN=BX000468.1 PE=4 SV=1		16	16	6	4	4	15	13	16	6	4	2	11	12	11	9	10	5	8	0	10	14	12	10	8	12				1031000	1252200	1562900	95062000	68172000	139980000	551150	449870	177960	46044000	31592000	41588000	12478000	8637400	5202900	1827900	0	82241000
530	E7FDK4;F1R4I0	>tr|E7FDK4|E7FDK4_DANRE Uncharacterized protein OS=Danio rerio GN=podn PE=4 SV=1;>tr|F1R4I0|F1R4I0_DANRE Uncharacterized protein (Fragment) OS=Danio rerio GN=podn PE=4 SV=1		16	16	2	5	4	11	12	13	11	11	11	12	13	13	10	12	13	14	13	13	15	12	11	13	13				166480	364640	364400	769610	683760	847240	2254700	1658200	1056000	4199000	3498100	4285100	1959600	1679700	5557100	9725600	7153100	10861000
696	F1Q9F4;F1QHC7;Q4KMF5	>tr|F1Q9F4|F1Q9F4_DANRE Uncharacterized protein OS=Danio rerio GN=zgc:111821 PE=4 SV=1;>tr|F1QHC7|F1QHC7_DANRE Uncharacterized protein (Fragment) OS=Danio rerio GN=zgc:111821 PE=4 SV=1		16	16	8	7	9	14	13	12	16	16	15	15	16	14	15	15	13	14	14	16	15	14	14	11	15				3121600	3479500	2449000	20395000	19507000	37826000	112050000	49146000	27932000	164820000	196280000	117990000	277470000	221930000	116480000	159060000	204810000	456650000
791	F1QFZ8	>tr|F1QFZ8|F1QFZ8_DANRE Uncharacterized protein (Fragment) OS=Danio rerio GN=mmp13b PE=4 SV=1		16	16	7	7	6	8	9	5	16	15	15	13	11	14	7	9	11	15	13	13	14	14	11	8	12				1664500	2287000	3572000	1324400	1372500	832610	50585000	39453000	34955000	13178000	6606200	7684000	3276900	3054700	33035000	49500000	69218000	71810000
848	F1QJK9;B8JL32	>tr|F1QJK9|F1QJK9_DANRE Uncharacterized protein (Fragment) OS=Danio rerio GN=loxl4 PE=4 SV=1		16	7	10	8	7	8	8	10	11	13	12	11	10	15	15	13	5	6	6	3	10	5	4	6	7				3677000	6154300	2380500	1911700	1537300	2392300	14756000	11780000	13553000	17311000	8663600	9799800	38048000	41167000	2601900	2226000	4242500	1827100
896	F1QP85	>tr|F1QP85|F1QP85_DANRE Uncharacterized protein (Fragment) OS=Danio rerio GN=CABZ01072249.1 PE=4 SV=1		16	12	10	9	11	13	11	12	15	14	14	13	11	14	11	12	11	11	11	8	10	10	10	7	9				6435000	8044100	6907400	12230000	20229000	13186000	48319000	37079000	34518000	44644000	29511000	20988000	13870000	13975000	9013700	12950000	23844000	22992000
995	F1QYX8	>tr|F1QYX8|F1QYX8_DANRE Uncharacterized protein OS=Danio rerio GN=zgc:158138 PE=3 SV=1		16	13	14	13	14	13	15	11	11	12	10	9	9	11	6	5	5	8	4	0	2	2	11	3	4				7810800	4020600	4255500	8030600	7014100	6506000	2164600	4596700	2969300	514990	640680	1038100	625900	366540	2019000	933540	461900	0
1244	Q45FX9	>tr|Q45FX9|Q45FX9_DANRE BetaA2-2-crystallin OS=Danio rerio GN=cryba2b PE=2 SV=1		16	11	16	15	15	6	3	3	5	9	6	0	0	0	2	2	1	1	1	0	0	0	0	0	0				193460000	231570000	181680000	116510	0	27314	212170	1972400	112900	0	0	0	0	0	0	0	0	0
1482	Q6PE34	>tr|Q6PE34|Q6PE34_DANRE Novel protein (Zgc:65894) OS=Danio rerio GN=zgc:65894 PE=2 SV=1		16	3	11	11	9	10	9	11	12	12	11	11	12	11	9	11	11	12	7	4	13	9	11	9	7				0	0	0	0	0	0	0	0	0	0	695460	0	0	0	0	223540	0	0
1583	Q7ZVK9;Q6NYQ0;E7FBZ3	>tr|Q7ZVK9|Q7ZVK9_DANRE Tpm1 protein OS=Danio rerio GN=tpm1 PE=2 SV=1;>tr|Q6NYQ0|Q6NYQ0_DANRE Tropomyosin 1 (Alpha) OS=Danio rerio GN=tpm1 PE=2 SV=1;>tr|E7FBZ3|E7FBZ3_DANRE Uncharacterized protein OS=Danio rerio GN=tpm1 PE=3 SV=1		16	6	0	0	0	7	6	5	10	8	5	12	8	8	6	8	12	11	13	7	5	8	10	9	7				0	0	0	2003200	1006900	2598500	1000800	646220	900250	3833500	3067600	3385900	634900	1081900	6363200	12949000	31746000	5931800
319	CON__P00760;CON__P00761	>P00760 SWISS-PROT:P00760|TRY1_BOVIN Cationic trypsin (precursor, SB) (Beta-trypsin) [Bos taurus]		15	15	15	14	11	14	15	14	12	13	12	9	10	12	10	11	8	12	10	9	12	10	13	10	12			+	1730600000	2051800000	757600000	727100000	973280000	620620000	740660000	816020000	565270000	334820000	247590000	198200000	399260000	292100000	210790000	188340000	301300000	328880000
56	A3KPR4;E7F7C7	>tr|A3KPR4|A3KPR4_DANRE Histone H4 OS=Danio rerio GN=wu:fe37d09 PE=3 SV=1;>tr|E7F7C7|E7F7C7_DANRE Histone H4 OS=Danio rerio GN=CABZ01041214.1 PE=3 SV=1		15	15	10	11	12	12	13	12	15	15	13	12	14	14	13	11	12	14	13	11	9	13	9	14	13				37930000	62777000	62913000	43438000	65948000	41474000	849650000	521890000	664600000	561120000	405770000	400220000	220200000	207010000	338910000	184960000	107510000	295280000
111	A8E4S8;E7F8X7	>tr|A8E4S8|A8E4S8_DANRE Novel protein similar to crystallin, gamma family OS=Danio rerio GN=crygm2d10 PE=2 SV=1;>tr|E7F8X7|E7F8X7_DANRE Uncharacterized protein OS=Danio rerio GN=si:ch211-212n6.17 PE=4 SV=1		15	1	14	14	14	4	4	1	3	8	2	0	0	0	0	0	0	0	0	0	0	0	1	0	0				0	0	125790000	0	0	0	0	0	0	0	0	0	0	0	0	0	0	0
133	A8KC28;F1R2A5	>tr|A8KC28|A8KC28_DANRE Novel coagulation factor (Zgc:63987) OS=Danio rerio GN=proc PE=2 SV=1;>tr|F1R2A5|F1R2A5_DANRE Uncharacterized protein OS=Danio rerio GN=proc PE=3 SV=1		15	6	9	9	8	13	12	13	11	13	8	11	10	11	14	12	10	11	12	10	12	11	10	10	9				4889300	4612500	7030800	30563000	31600000	52936000	21061000	9824700	13260000	35492000	25610000	27929000	84313000	93427000	12658000	23730000	33333000	23832000
654	B0S6N3;F1Q6V5	>tr|B0S6N3|B0S6N3_DANRE Novel protein similar to crystallin, gamma family OS=Danio rerio GN=crygm2d2 PE=4 SV=1;>tr|F1Q6V5|F1Q6V5_DANRE Uncharacterized protein OS=Danio rerio GN=si:ch211-212n6.18 PE=4 SV=1		15	5	15	15	13	3	0	0	2	4	1	0	0	1	1	2	0	0	0	0	1	0	0	1	0				1250500000	1181400000	523130000	193390	0	0	234170	2409800	0	0	0	0	0	87736	0	0	0	0
187	B0S6P0	>tr|B0S6P0|B0S6P0_DANRE Novel protein similar to crystallin, gamma family OS=Danio rerio GN=crygm2d9 PE=4 SV=1		15	1	14	14	14	4	4	1	4	7	3	0	0	0	0	0	0	0	0	0	0	0	1	0	0				0	0	1322000	0	0	0	0	0	0	0	0	0	0	0	0	0	0	0
293	B8JL29;B8JL30;B8JL31	>tr|B8JL29|B8JL29_DANRE High-mobility group box 2 OS=Danio rerio GN=hmgb2 PE=4 SV=1;>tr|B8JL30|B8JL30_DANRE High-mobility group box 2 OS=Danio rerio GN=hmgb2 PE=4 SV=1		15	14	9	8	9	10	11	12	11	10	9	12	11	10	12	9	7	3	4	10	6	8	5	7	8				15478000	14134000	11139000	19462000	17141000	27483000	29113000	15878000	23661000	31181000	29269000	14703000	17144000	23005000	25359000	0	8841500	20556000
304	B8JLR6	>tr|B8JLR6|B8JLR6_DANRE Novel protein similar to G.gallus KBP, Kainate-binding protein (KBP) OS=Danio rerio GN=si:ch211-251b21.1 PE=4 SV=1		15	15	12	11	11	13	12	13	10	10	8	7	8	9	7	6	2	3	0	0	2	1	1	0	1				17552000	14521000	22514000	19696000	24544000	9277400	1377400	3515200	3821100	767730	1369900	1975800	1532600	1885700	433830	176180	0	0
431	E7F4V5	>tr|E7F4V5|E7F4V5_DANRE Uncharacterized protein OS=Danio rerio GN=crybb1l2 PE=4 SV=1		15	1	14	15	15	6	5	1	7	9	6	1	0	4	4	5	0	0	1	1	0	1	1	0	0				0	0	398550	0	0	0	0	0	0	0	0	0	0	0	0	0	0	0
483	E7F9Z3;F1QR16	>tr|E7F9Z3|E7F9Z3_DANRE Uncharacterized protein OS=Danio rerio GN=anpep PE=4 SV=1;>tr|F1QR16|F1QR16_DANRE Uncharacterized protein OS=Danio rerio GN=anpep PE=4 SV=1		15	15	11	12	12	15	14	14	1	4	7	0	0	1	0	0	0	0	1	0	0	0	0	0	0				2790300	2504100	4277300	15562000	16454000	8091700	0	685130	664110	0	0	0	0	0	0	0	0	0
488	E7FAF8	>tr|E7FAF8|E7FAF8_DANRE Uncharacterized protein OS=Danio rerio GN=CU929190.1 PE=4 SV=1		15	15	2	0	1	3	2	2	7	8	4	5	6	6	8	7	8	8	8	9	8	7	10	11	15				221590	0	0	358110	247940	279460	1468100	522580	416510	407890	356510	395230	3242000	3493900	3200500	4830300	933290	2647800
643	F1Q5U3;E7EXF3;F1RCF3	>tr|F1Q5U3|F1Q5U3_DANRE Uncharacterized protein OS=Danio rerio GN=slc35c2 PE=4 SV=1;>tr|E7EXF3|E7EXF3_DANRE Uncharacterized protein OS=Danio rerio GN=OTTDARG00000017162 PE=4 SV=1;>tr|F1RCF3|F1RCF3_DANRE Uncharacterized protein OS=Danio rerio GN=slc35c2 PE=		15	15	0	0	0	1	0	1	6	2	0	6	9	10	15	14	10	10	7	12	13	10	12	11	12				0	0	0	0	0	0	259330	278010	0	383900	612340	513270	4460200	4807100	912430	1277600	621670	1248200
985	F1QY29	>tr|F1QY29|F1QY29_DANRE Uncharacterized protein OS=Danio rerio GN=PRELP PE=4 SV=1		15	15	9	9	8	14	12	14	11	11	9	11	10	12	12	10	13	12	12	10	13	11	12	10	11				6224100	3953100	4818600	27230000	21365000	32154000	9515700	9461400	9098700	12891000	6472300	12825000	9426400	8376200	23514000	29749000	22668000	24874000
1045	F1R446;F1QAZ6;F1QDX2;F1R443;F1R445	>tr|F1R446|F1R446_DANRE Uncharacterized protein OS=Danio rerio GN=spna2 PE=4 SV=1		15	15	0	2	2	1	1	0	6	9	9	13	15	14	11	11	5	4	0	2	9	7	8	4	5				0	0	594850	0	0	0	398440	925550	754670	1972200	2485000	3010500	1746100	1287100	862730	321660	0	0
1184	Q15I84	>tr|Q15I84|Q15I84_DANRE Crystallin gamma EM2-5 OS=Danio rerio GN=crygm2d5 PE=2 SV=1		15	0	14	14	14	4	4	1	3	7	2	0	0	0	0	0	0	0	0	0	0	0	1	0	0				231610000	421430000	108640000	0	0	0	0	0	0	0	0	0	0	0	0	0	0	0
1185	Q15I85	>tr|Q15I85|Q15I85_DANRE Crygm2d3 protein OS=Danio rerio GN=crygm2d3 PE=2 SV=1		15	0	14	14	14	5	5	2	4	8	3	0	0	0	0	0	0	0	0	0	0	0	1	0	0				2745700000	4061600000	1634500000	439550	234560	133470	777880	9871400	269710	0	0	0	0	0	0	0	0	0
1186	Q15JE7	>tr|Q15JE7|Q15JE7_DANRE Opticin OS=Danio rerio GN=optc PE=2 SV=1		15	15	3	4	3	14	12	15	1	2	2	7	7	7	1	3	0	1	1	2	1	0	0	0	0				164790	279100	123350	20723000	4006400	37292000	0	47242	121920	653010	355860	565120	0	136240	0	0	0	338490
1218	Q6DHB6;Q1LXJ0;E9QDY4;F1Q8P5;F1Q7G3;Q1LXJ8;Q1LXJ7;Q9PWD8;E7FCX7;E9QDY3;F2Z4U1;Q1LXJ1;Q1LXJ2;Q1LXJ6;E7F483	>tr|Q6DHB6|Q6DHB6_DANRE Uncharacterized protein OS=Danio rerio GN=zgc:92533 PE=2 SV=1;>tr|Q1LXJ0|Q1LXJ0_DANRE Novel protein similar to type I cytokeratin, enveloping layer OS=Danio rerio GN=zgc:92533 PE=2 SV=1;>tr|E9QDY4|E9QDY4_DANRE Uncharacterized protei		15	7	3	4	4	5	2	3	10	10	8	12	12	13	8	8	5	8	3	5	11	9	11	8	12				0	0	0	296810	0	0	1087800	727300	400060	2184100	1764400	1495900	1304600	878520	1099800	2291700	922720	303000
1378	Q6GMI5	>tr|Q6GMI5|Q6GMI5_DANRE Biglycan OS=Danio rerio GN=bgn PE=2 SV=1		15	15	7	6	4	12	11	11	10	11	9	12	12	14	12	12	12	13	14	14	15	14	15	13	14				1668600	3232200	1517100	8350400	8061800	21465000	22141000	20415000	10284000	62901000	51258000	60486000	37293000	45360000	58811000	122970000	65803000	214870000
1403	Q6NWC1	>tr|Q6NWC1|Q6NWC1_DANRE Uncharacterized protein OS=Danio rerio GN=vdac1 PE=2 SV=1		15	15	15	13	10	15	15	14	11	13	12	9	9	10	7	9	5	8	4	1	5	3	8	9	5				25985000	19889000	26428000	21307000	17088000	18296000	8565300	10962000	7622600	1728500	2645400	1994700	2479200	1878000	1749900	1633400	616120	0
1434	Q6P0V8	>tr|Q6P0V8|Q6P0V8_DANRE Annexin A5b OS=Danio rerio GN=anxa5b PE=2 SV=1		15	15	12	11	13	13	13	12	15	14	15	14	13	15	14	12	5	8	9	9	10	11	9	10	10				7249400	4387200	9857300	7339700	5707100	6348700	6218900	9716100	10392000	3674900	3136800	5693200	2966100	3377200	1020300	2167000	1059300	1013300
1510	Q6TLG8	>tr|Q6TLG8|Q6TLG8_DANRE Ribosomal protein S3 OS=Danio rerio GN=rps3 PE=2 SV=1		15	15	11	10	12	10	12	10	12	14	14	12	10	12	8	10	3	5	2	3	4	4	3	3	4				9198400	8763800	8442100	2567200	3020500	3111400	9799500	13927000	16259000	7703800	5601100	6383100	5984400	5248700	3078700	1359000	273120	791610
340	CON__Q92764	>Q92764 TREMBL:Q92764|HA5_Keratin, type I cuticular HA5 (Hair keratin, type I HA5)		14	6	3	11	11	6	7	3	3	9	3	1	5	4	8	6	4	2	1	9	3	3	2	3	3			+	0	28477000	2113200	0	0	0	0	963090	0	0	0	0	451730	0	0	0	0	1332200
1173	P13104;Q6P0W3;F1RE40;Q803M1;A7E2K1	>sp|P13104|TPM1_DANRE Tropomyosin alpha-1 chain OS=Danio rerio GN=tpma PE=2 SV=1;>tr|Q6P0W3|Q6P0W3_DANRE Novel protein similar to vertebrate tropomyosin 1 (Alpha) (TPM1, zgc:77592) OS=Danio rerio GN=tpm3 PE=2 SV=1;>tr|F1RE40|F1RE40_DANRE Uncharacterized pr		14	4	0	0	0	9	8	8	9	10	7	13	10	11	8	10	11	6	8	9	6	11	6	5	6				0	0	0	399530	337540	282610	0	56721	0	758030	764090	513560	105160	0	240530	0	0	573020
33	A2BID8	>tr|A2BID8|A2BID8_DANRE Aplp2 protein OS=Danio rerio GN=aplp2 PE=2 SV=2		14	14	0	1	1	12	12	13	9	1	2	12	13	9	6	4	4	5	8	11	10	13	9	3	9				0	0	0	3438700	1997600	6752000	1006200	0	338100	5978000	3981500	3361100	2787700	3243100	718020	3865100	6206600	4803200
50	A3KNR6;B0S6N8	>tr|A3KNR6|A3KNR6_DANRE Novel protein similar to crystallin, gamma family OS=Danio rerio GN=zgc:162402 PE=2 SV=1;>tr|B0S6N8|B0S6N8_DANRE Novel protein similar to crystallin, gamma family OS=Danio rerio GN=zgc:162402 PE=4 SV=1		14	0	14	14	13	1	2	0	1	7	2	0	0	0	1	1	1	1	1	0	1	0	0	0	0				245860000	970950000	569180000	0	0	0	0	2526800	0	0	0	0	0	0	0	0	0	0
151	B0JZL7;Q5RI82	>tr|B0JZL7|B0JZL7_DANRE Si:ch211-142e24.2 protein OS=Danio rerio GN=si:ch211-142e24.2 PE=2 SV=1;>tr|Q5RI82|Q5RI82_DANRE Novel protein similar to vertebrate ectonucleotide pyrophosphatase/phosphodiesterase protein family OS=Danio rerio GN=si:ch211-142e24.2		14	14	14	14	12	10	13	8	8	12	10	4	9	10	12	12	4	2	2	1	4	4	1	1	3				21225000	11178000	20077000	6026700	8000100	5536000	1404800	2241100	2017000	755000	992080	1413500	3920800	5779300	382250	126310	924870	0
160	B0R171	>tr|B0R171|B0R171_DANRE Coatomer protein complex, subunit beta 2 OS=Danio rerio GN=copb2 PE=2 SV=1		14	14	13	12	13	6	6	7	11	11	12	7	9	10	8	7	1	2	1	1	3	1	2	3	1				12333000	10974000	7395800	1661000	2236300	1508500	5512700	7236000	8011000	1574000	1593800	1738800	1778600	1287500	0	3974300	0	0
1268	B0S6M3;Q504G5	>tr|B0S6M3|B0S6M3_DANRE Crystallin, gamma M2d1 OS=Danio rerio GN=crygm2d1 PE=4 SV=1;>tr|Q504G5|Q504G5_DANRE Crystallin, gamma M2d1 OS=Danio rerio GN=crygm2d1 PE=2 SV=1		14	0	14	14	13	2	1	0	3	6	2	0	0	1	1	2	0	0	0	0	1	0	0	1	0				30858000	7738500	10983000	0	0	0	0	0	0	0	0	0	0	0	0	0	0	0
1389	B0S6N4;Q6IQI4	>tr|B0S6N4|B0S6N4_DANRE Crystallin, gamma M2d6 OS=Danio rerio GN=crygm2d6 PE=4 SV=1;>tr|Q6IQI4|Q6IQI4_DANRE Crystallin gamma EM2-6 OS=Danio rerio GN=crygm2d6 PE=2 SV=1		14	4	14	14	14	2	1	0	3	6	2	0	0	1	1	2	0	0	0	0	1	0	0	1	0				63567000	19970000	11948000	0	0	0	0	0	0	0	0	0	0	0	0	0	0	0
211	B0V0E5;B0V0E4;F1QKA6;F1R8S2;F1RC40;F1R2Z2	>tr|B0V0E5|B0V0E5_DANRE Amyloid beta (A4) protein b OS=Danio rerio GN=appb PE=4 SV=1;>tr|B0V0E4|B0V0E4_DANRE Amyloid beta (A4) protein b OS=Danio rerio GN=appb PE=4 SV=1;>tr|F1QKA6|F1QKA6_DANRE Uncharacterized protein OS=Danio rerio GN=appb PE=4 SV=1		14	11	4	3	5	11	10	11	11	11	9	9	13	11	12	12	8	13	11	12	9	12	10	9	12				1897000	2773600	1927300	5695600	4158100	5977100	8667300	4749400	4885600	17517000	19262000	14681000	23152000	29286000	5943300	12107000	15433000	25884000
420	E7F3J6	>tr|E7F3J6|E7F3J6_DANRE Uncharacterized protein OS=Danio rerio GN=BX649391.1 PE=3 SV=1		14	14	2	2	2	4	1	3	9	8	6	11	11	11	9	9	10	11	6	7	13	12	9	6	9				122310	1286600	1620200	263540	0	563750	8719300	8922500	2105700	126150000	169480000	205870000	36222000	44605000	151030000	72862000	1084900	33580000
426	E7F4N6	>tr|E7F4N6|E7F4N6_DANRE Uncharacterized protein OS=Danio rerio GN=CR762436.1 PE=4 SV=1		14	14	11	9	8	6	6	3	8	12	9	7	5	7	11	12	2	5	4	4	6	3	5	3	6				1503500	545710	1765000	291410	167190	125700	926230	2434100	1072900	346600	728590	1011600	14054000	14273000	81902	158560	239350	151790
454	E7F797;F1QKY8	>tr|E7F797|E7F797_DANRE Uncharacterized protein OS=Danio rerio GN=FP102463.1 PE=3 SV=1;>tr|F1QKY8|F1QKY8_DANRE Uncharacterized protein OS=Danio rerio GN=TUBB2A PE=3 SV=1		14	1	11	11	10	10	11	10	11	11	11	10	11	11	10	9	8	9	6	6	13	11	8	9	6				0	0	0	0	0	0	0	0	0	0	0	0	0	0	0	0	0	0
83	E7F8G7;A5WV02;F6NJN5;Q1L8L8;Q1L9D6;Q1LWW9;Q1LYP8;A5WV03	>tr|E7F8G7|E7F8G7_DANRE Uncharacterized protein OS=Danio rerio GN=si:dkey-151c10.1 PE=4 SV=1;>tr|A5WV02|A5WV02_DANRE Novel protein similar to vertebrate plectin 1, intermediate filament binding protein 500kDa (PLEC1) OS=Danio rerio GN=si:dkey-151c10.1 PE=4		14	11	0	0	1	2	3	2	2	5	1	11	10	12	4	4	1	1	0	0	5	2	7	2	0				0	0	0	0	1425000	0	0	318160	0	890820	1862700	1270500	466060	385030	0	0	0	0
474	E7F8X0	>tr|E7F8X0|E7F8X0_DANRE Uncharacterized protein OS=Danio rerio GN=FP074862.1 PE=4 SV=1		14	14	2	1	2	8	10	6	11	10	10	12	11	12	11	11	12	13	11	11	13	10	10	10	12				2219900	0	2191800	869020	613050	1077600	2915700	2351100	2102900	6253600	4961200	5885300	2686300	2754200	11649000	16593000	10964000	19624000
529	E7FD96;F1QI74;Q6DHT2;Q568F0;Q6P969;E9QGR4;F1QQW9	>tr|E7FD96|E7FD96_DANRE Elongation factor 1-alpha OS=Danio rerio GN=ef1a PE=3 SV=1;>tr|F1QI74|F1QI74_DANRE Elongation factor 1-alpha OS=Danio rerio GN=ef1a PE=3 SV=1;>tr|Q6DHT2|Q6DHT2_DANRE Elongation factor 1-alpha OS=Danio rerio GN=zgc:92085 PE=2 SV=1;>t		14	2	10	13	12	12	12	9	10	8	10	10	12	12	10	10	6	6	4	4	7	5	2	6	2				0	0	0	0	0	0	0	0	0	0	0	113470	0	0	0	0	0	0
661	F1Q775	>tr|F1Q775|F1Q775_DANRE Uncharacterized protein OS=Danio rerio GN=cilp PE=4 SV=1		14	13	4	5	1	13	14	14	5	5	5	8	7	11	3	1	5	5	1	2	3	4	4	7	4				478260	415550	0	54889000	34191000	43451000	646310	390190	215690	2461400	3158600	1987600	106400	0	886760	1083600	0	0
783	F1QFL7;Q0VIL3	>tr|F1QFL7|F1QFL7_DANRE Uncharacterized protein OS=Danio rerio GN=otomp PE=4 SV=1;>sp|Q0VIL3|OTOMP_DANRE Otolith matrix protein 1 OS=Danio rerio GN=otomp PE=2 SV=1		14	14	11	10	9	10	9	8	11	12	10	2	3	3	6	2	0	10	11	1	1	0	0	1	0				7765900	12817000	3979600	11733000	9136600	4560000	70319000	17452000	19347000	155780	319100	399760	431940	1133100	0	160580000	365560000	0
249	F1QR30;F1QT32;B7ZDB5;F1RCG4	>tr|F1QR30|F1QR30_DANRE Uncharacterized protein (Fragment) OS=Danio rerio GN=zgc:77123 PE=4 SV=1;>tr|F1QT32|F1QT32_DANRE Uncharacterized protein (Fragment) OS=Danio rerio GN=zgc:77123 PE=4 SV=1;>tr|B7ZDB5|B7ZDB5_DANRE Novel protein similar to biglycan-like		14	14	5	5	5	8	8	9	8	7	7	8	7	6	8	8	7	13	14	11	12	11	13	13	13				3100600	2823500	2563300	9076100	9655200	11338000	9364900	8472100	5993000	9100300	14536000	8894800	16915000	10415000	68315000	69365000	65711000	52326000
944	F1QTT3;E7EZA4;Q7ZWH9	>tr|F1QTT3|F1QTT3_DANRE Uncharacterized protein OS=Danio rerio GN=jup PE=4 SV=1		14	10	1	1	2	2	1	0	5	4	2	12	12	11	9	7	6	7	1	10	11	13	10	11	10				0	0	718120	339190	0	0	696860	260420	746110	3788400	4335500	4670200	1286300	1113100	1559700	456600	0	1079400
611	F1QYE2;E9QHI1;F1QQX9	>tr|F1QYE2|F1QYE2_DANRE Uncharacterized protein OS=Danio rerio GN=tnc PE=4 SV=1;>tr|E9QHI1|E9QHI1_DANRE Uncharacterized protein OS=Danio rerio GN=tnc PE=4 SV=1;>tr|F1QQX9|F1QQX9_DANRE Uncharacterized protein OS=Danio rerio GN=tnc PE=4 SV=1		14	14	12	11	10	11	12	9	8	11	9	10	7	10	8	9	4	7	3	4	6	5	2	1	4				14592000	12490000	9266600	5352500	5384100	6024200	1856500	2830700	2595800	2592800	4404800	3733900	2795000	2965100	3130300	2636100	3115500	2230200
1030	F1R2V7	>tr|F1R2V7|F1R2V7_DANRE ATP synthase subunit beta OS=Danio rerio GN=ATP5B PE=3 SV=1		14	14	13	11	10	13	12	14	10	8	9	9	8	8	7	7	6	7	7	7	7	6	7	10	7				3995200	7016300	5820900	7398800	5575000	11829000	2164400	2230300	1775500	1545100	1177100	1651500	627040	707360	1297100	1654500	885180	737740
1075	F1R6K4;F1QIW0;A8E7E3	>tr|F1R6K4|F1R6K4_DANRE Uncharacterized protein (Fragment) OS=Danio rerio GN=cfh PE=4 SV=1		14	0	1	1	1	10	10	12	12	10	10	10	12	12	11	7	6	6	3	7	4	8	4	3	6				0	0	0	3299800	1980300	3150000	2512200	1157200	1424100	3813800	3856500	2872900	1584300	1723600	662040	1387600	1326200	1455900
1077	F1R6N3;F1QSK0;F1QZ98	>tr|F1R6N3|F1R6N3_DANRE Uncharacterized protein (Fragment) OS=Danio rerio GN=anxa6 PE=3 SV=1;>tr|F1QSK0|F1QSK0_DANRE Uncharacterized protein (Fragment) OS=Danio rerio GN=anxa6 PE=3 SV=1		14	13	3	3	5	8	8	8	4	9	8	10	8	9	3	2	11	10	9	3	9	7	7	7	6				0	0	170940	346340	413700	416030	347850	629430	637400	246300	461690	307010	202330	0	1850400	2068000	920950	205100
1088	F1R7N2	>tr|F1R7N2|F1R7N2_DANRE Uncharacterized protein OS=Danio rerio GN=tgm2b PE=4 SV=1		14	14	9	8	11	13	13	13	11	10	9	8	7	9	6	5	6	6	4	3	7	6	6	5	5				6525200	7091500	5258700	17783000	24409000	24829000	2163400	2036100	1476700	748870	792520	838730	664920	579450	3469800	1736700	1176800	900610
1102	F1R8U0	>tr|F1R8U0|F1R8U0_DANRE Uncharacterized protein OS=Danio rerio GN=zgc:153629 PE=3 SV=1		14	7	5	5	5	4	4	4	13	11	10	13	12	13	10	12	7	5	1	9	8	12	8	3	7				0	0	0	0	0	0	6629100	3435700	3960900	9202300	7390100	6131700	3853100	3926200	1929800	1571300	0	2144500
1183	Q15I82;B0S6N1;F1QQ51	>tr|Q15I82|Q15I82_DANRE Crystallin gamma EM2-7 OS=Danio rerio GN=crygm2d7 PE=2 SV=1;>tr|B0S6N1|B0S6N1_DANRE Novel protein similar to crystallin, gamma family OS=Danio rerio GN=si:ch211-212n6.16 PE=4 SV=1;>tr|F1QQ51|F1QQ51_DANRE Uncharacterized protein (Fra		14	2	12	11	11	5	5	2	4	7	3	0	0	0	0	0	0	0	0	0	0	0	1	0	0				0	0	621180	0	0	0	0	0	0	0	0	0	0	0	0	0	0	0
1202	Q1LV51	>tr|Q1LV51|Q1LV51_DANRE Novel protein similar to vertebrate osteoglycin (Osteoinductive factor, mimecan) (OGN) OS=Danio rerio GN=ogn PE=4 SV=1		14	14	9	6	9	12	12	13	7	11	7	9	9	10	7	7	9	8	8	8	8	8	7	8	5				13400000	11097000	15737000	105250000	73332000	134000000	53056000	23599000	30495000	54117000	39489000	38492000	30551000	39496000	44029000	45877000	64217000	20326000
1412	Q6NX10;B0S730	>tr|Q6NX10|Q6NX10_DANRE Solute carrier family 25 (Mitochondrial carrier; adenine nucleotide translocator), member 4 OS=Danio rerio GN=slc25a4 PE=2 SV=1;>tr|B0S730|B0S730_DANRE Novel protein similar to vertebrate solute carrier family 25 (Mitochondrial carr		14	8	4	5	4	13	12	13	10	11	10	7	9	10	7	10	7	10	8	3	9	9	9	7	7				0	0	0	1672900	1469200	3458400	975810	1977600	1967100	1891100	1885000	7283900	1034800	856570	4833400	2407000	2062400	0
1602	Q803N7;Q6IQV0;E9QIP1;E9QCX0;E9QHH7;B0R0Q0	>tr|Q803N7|Q803N7_DANRE Casein kinase 2 alpha 1 OS=Danio rerio GN=ck2a1 PE=2 SV=1;>tr|Q6IQV0|Q6IQV0_DANRE Casein kinase 2 alpha 1 OS=Danio rerio GN=ck2a1 PE=2 SV=1;>tr|E9QIP1|E9QIP1_DANRE Uncharacterized protein OS=Danio rerio GN=ck2a1 PE=3 SV=1		14	11	11	11	12	12	12	13	6	7	5	4	3	6	6	6	1	3	1	2	3	2	2	1	0				36933000	36630000	41512000	22516000	23707000	28671000	1391500	3687500	2756800	292430	284520	324260	696220	524510	0	213180	0	216870
336	CON__Q02257;F1QYT6	>Q02257 SWISS-PROT:Q02257|PLAK_MOUSE Junction plakoglobin OS=Mus musculus GN=Jup PE=1 SV=3		13	10	8	8	9	8	9	5	8	10	10	8	7	4	6	8	6	6	5	7	11	8	6	4	9			+	1489700	3033400	3061000	634460	712450	328380	866190	544810	824000	793680	716290	1052000	994310	884480	1308100	566400	542500	720840
1237	Q29RB4	>sp|Q29RB4|OLF3A_DANRE Olfactomedin-like protein 3A OS=Danio rerio GN=olfml3a PE=2 SV=2		13	13	2	5	3	7	7	8	10	11	8	10	10	8	9	10	9	12	8	11	11	11	8	9	10				1142700	984920	406150	1350500	1355800	1234500	3805900	3881900	3648300	12234000	5921200	8621400	3103700	3584400	17541000	17883000	10963000	33010000
1525	Q7SXP4;E9QGF8;E9QIC5	>sp|Q7SXP4|SRS1A_DANRE Serine/arginine-rich splicing factor 1A OS=Danio rerio GN=srsf1a PE=2 SV=2;>tr|E9QGF8|E9QGF8_DANRE Uncharacterized protein OS=Danio rerio GN=srsf1a PE=4 SV=1;>tr|E9QIC5|E9QIC5_DANRE Uncharacterized protein OS=Danio rerio GN=srsf1a PE		13	1	3	4	4	4	5	5	13	12	12	11	8	10	10	10	6	4	3	6	2	4	5	5	6				4773600	5562800	4543800	6058400	2746600	9795600	22963000	10996000	10872000	12380000	8542900	9953400	10792000	11661000	2612500	2266900	2097300	2582500
36	A2CE51	>tr|A2CE51|A2CE51_DANRE Novel protein (Wu:fj53d02) OS=Danio rerio GN=eef2l2 PE=4 SV=1		13	2	10	11	10	10	10	9	7	6	8	6	9	10	4	5	1	1	3	2	6	1	4	4	2				0	0	0	0	0	320750	0	0	0	0	0	0	0	0	0	0	0	0
230	B3DJG2	>tr|B3DJG2|B3DJG2_DANRE Similar to procollagen C-endopeptidase enhancer OS=Danio rerio GN=LOC794872 PE=2 SV=1		13	13	3	2	1	3	1	1	11	13	11	11	10	11	11	12	9	12	12	10	11	10	10	9	10				3436500	1325400	0	794970	0	0	18290000	12672000	13904000	18791000	10411000	11140000	18708000	23410000	25492000	19339000	19930000	30645000
273	B8A5Q3;Q6NSN2	>tr|B8A5Q3|B8A5Q3_DANRE Monoamine oxidase OS=Danio rerio GN=moa PE=4 SV=1;>sp|Q6NSN2|AOF_DANRE Amine oxidase [flavin-containing] OS=Danio rerio GN=mao PE=1 SV=1		13	13	9	8	8	11	13	8	5	9	6	4	5	5	2	2	2	4	2	1	3	1	3	1	1				2749900	1806700	3568600	8522000	12997000	7269900	920710	3468500	4398200	572750	820180	1064200	523720	415440	1117900	1259400	1043000	0
290	B8JKS9	>tr|B8JKS9|B8JKS9_DANRE ATPase, Na+/K+ transporting, alpha 1a.2 polypeptide OS=Danio rerio GN=atp1a1a.2 PE=3 SV=1		13	1	12	11	12	11	11	12	11	12	12	10	11	11	10	10	5	5	5	2	3	3	6	4	3				0	0	0	0	0	0	0	0	0	0	0	0	0	0	0	0	0	0
354	E7EXE8;F1QZP1;E9QGN6	>tr|E7EXE8|E7EXE8_DANRE Uncharacterized protein OS=Danio rerio GN=OTTDARG00000032964 PE=4 SV=1		13	13	0	0	1	1	2	2	12	12	10	6	11	5	9	8	13	12	8	7	4	7	11	12	10				0	0	0	0	214070	356740	3050600	1879400	916740	380650	635520	480560	1161000	1372700	3656200	8449000	5206200	4176400
446	E7F6D3	>tr|E7F6D3|E7F6D3_DANRE Uncharacterized protein OS=Danio rerio GN=CR774184.2 PE=4 SV=1		13	13	4	5	3	10	12	12	7	9	6	5	4	6	1	1	4	4	1	1	3	1	1	2	1				783960	180350	416340	10946000	11472000	13267000	425710	299400	107540	76764	192390	114990	0	0	369520	211260	0	0
460	E7F7V4	>tr|E7F7V4|E7F7V4_DANRE Uncharacterized protein OS=Danio rerio GN=si:dkey-263o8.2 PE=4 SV=1		13	13	11	7	9	6	7	4	9	10	10	9	9	10	12	13	7	7	9	6	10	6	7	7	9				4484900	4414800	4562800	1203900	829880	706300	4286900	6116800	4786600	2402300	4290500	6041000	46799000	43867000	3602500	5170600	2386100	1735100
670	F1Q7N8;E9QCZ3	>tr|F1Q7N8|F1Q7N8_DANRE Uncharacterized protein (Fragment) OS=Danio rerio GN=si:dkey-28b4.8 PE=3 SV=1;>tr|E9QCZ3|E9QCZ3_DANRE Uncharacterized protein OS=Danio rerio GN=si:dkey-28b4.8 PE=3 SV=1		13	2	8	8	8	9	10	8	10	11	11	7	9	10	7	7	8	11	9	4	4	4	10	8	5				0	0	0	0	0	0	0	0	0	0	0	0	0	0	0	0	0	0
938	F1QTB5;E7FAG5;F1QEI0;F1QQM6	>tr|F1QTB5|F1QTB5_DANRE Uncharacterized protein OS=Danio rerio GN=rpn1 PE=4 SV=1;>tr|E7FAG5|E7FAG5_DANRE Uncharacterized protein OS=Danio rerio GN=rpn1 PE=4 SV=1;>tr|F1QEI0|F1QEI0_DANRE Uncharacterized protein OS=Danio rerio GN=rpn1 PE=4 SV=1;>tr|F1QQM6|F1		13	13	13	13	12	12	13	9	11	11	10	9	7	9	9	9	1	5	2	1	4	2	5	6	4				35528000	19011000	28160000	16544000	12959000	12970000	6237900	21954000	15118000	2012800	4675200	5035200	3290500	5302300	0	521490	977470	0
982	F1QXQ1;Q6NYA0;F1RBL9;F1RCS7	>tr|F1QXQ1|F1QXQ1_DANRE Uncharacterized protein OS=Danio rerio GN=srsf1b PE=4 SV=1;>sp|Q6NYA0|SRS1B_DANRE Serine/arginine-rich splicing factor 1B OS=Danio rerio GN=srsf1b PE=2 SV=1;>tr|F1RBL9|F1RBL9_DANRE Uncharacterized protein (Fragment) OS=Danio rerio G		13	1	3	4	4	4	5	5	12	12	11	10	8	9	9	10	6	4	3	6	2	4	5	5	6				0	0	0	0	0	0	0	24023	0	0	0	0	0	0	0	0	0	0
754	F1R590;F1QDQ1;E7F9E0	>tr|F1R590|F1R590_DANRE Uncharacterized protein OS=Danio rerio GN=copa PE=4 SV=1;>tr|F1QDQ1|F1QDQ1_DANRE Uncharacterized protein OS=Danio rerio GN=copa PE=4 SV=1		13	13	12	9	10	9	12	6	11	12	13	7	7	7	6	6	2	2	1	0	2	1	4	3	1				8427600	6544300	5415900	1616400	2439600	2328800	1560400	3110600	4060000	383260	1294400	785630	569620	656910	943120	1040800	0	0
1072	F1R6G3;Q6IQQ7	>tr|F1R6G3|F1R6G3_DANRE Uncharacterized protein (Fragment) OS=Danio rerio GN=lum PE=4 SV=1;>tr|Q6IQQ7|Q6IQQ7_DANRE Lumican OS=Danio rerio GN=lum PE=2 SV=1		13	13	3	4	3	11	9	10	10	9	8	12	10	9	8	9	11	9	10	9	10	9	11	8	8				321870	1126000	470320	20723000	8540600	23193000	11209000	7018400	4256100	49588000	39697000	37161000	14031000	15698000	98594000	103720000	78164000	105680000
1328	Q66HU4;A5PMN9;E7FBY5	>tr|Q66HU4|Q66HU4_DANRE Calpain 3, (P94) OS=Danio rerio GN=capn3 PE=2 SV=1		13	13	13	11	11	1	0	1	0	1	0	0	1	1	1	1	0	0	0	0	0	0	1	1	1				20523000	44392000	6846700	0	0	0	0	0	0	0	0	0	0	0	0	0	0	0
1361	Q6DGY4	>tr|Q6DGY4|Q6DGY4_DANRE Crystallin, beta A1b OS=Danio rerio GN=cryba1b PE=2 SV=1		13	13	13	12	13	2	0	0	4	5	4	0	0	0	1	3	0	0	0	1	0	0	1	1	0				1001600000	1626300000	435140000	222690	0	0	515640	18433000	715030	0	0	0	0	164470	0	0	0	0
1363	Q6DH12;E7FFX3	>tr|Q6DH12|Q6DH12_DANRE Novel protein (Zgc:92692) OS=Danio rerio GN=crygm2d13 PE=2 SV=1;>tr|E7FFX3|E7FFX3_DANRE Uncharacterized protein OS=Danio rerio GN=crygm2d13 PE=4 SV=1		13	9	13	13	11	1	0	0	0	5	0	0	0	0	1	1	0	0	0	0	0	0	0	0	0				401990000	765390000	170160000	0	0	0	0	1526500	0	0	0	0	0	0	0	0	0	0
1380	Q6GQM1	>tr|Q6GQM1|Q6GQM1_DANRE Tubulin, alpha 7 like OS=Danio rerio GN=tuba7l PE=2 SV=1		13	1	11	10	9	10	9	10	11	11	9	9	10	11	8	8	5	11	5	5	6	9	5	6	8				0	0	0	0	0	0	0	0	0	0	0	0	0	0	0	0	0	0
1400	Q6NW47	>tr|Q6NW47|Q6NW47_DANRE Uncharacterized protein OS=Danio rerio GN=CKAP4 PE=2 SV=1		13	13	11	9	9	7	10	8	10	13	11	6	7	8	4	5	1	2	2	0	1	0	2	1	1				10420000	5459200	10874000	3234100	4488300	1445900	4259100	6442600	6743900	1486700	2089800	2356200	2835400	1900600	0	0	268950	0
1446	Q6P3L9;F1R285;B8A4B0	>tr|Q6P3L9|Q6P3L9_DANRE Glutamate dehydrogenase 1 OS=Danio rerio GN=glud1b PE=2 SV=1;>tr|F1R285|F1R285_DANRE Uncharacterized protein (Fragment) OS=Danio rerio GN=glud1b PE=4 SV=1		13	13	11	8	9	11	11	11	13	13	10	2	3	6	2	3	4	5	3	7	12	11	7	3	6				4193000	4514800	3625200	1978800	3247400	2551400	1890700	2329300	2192700	274010	527510	301280	649910	236290	1231900	392060	257460	1201600
1451	Q6P5M3;A3KQ06	>tr|Q6P5M3|Q6P5M3_DANRE Ribosomal protein S9 OS=Danio rerio GN=rps9 PE=2 SV=1;>tr|A3KQ06|A3KQ06_DANRE Ribosomal protein S9 (Fragment) OS=Danio rerio GN=rps9 PE=3 SV=1		13	13	13	11	13	10	13	12	11	12	12	12	12	13	12	11	6	5	3	3	3	5	5	6	4				7355200	9952100	9087500	11799000	16320000	9195200	14171000	26036000	24715000	7229800	6676600	11036000	6464700	8227300	2376400	1774500	377330	531630
1456	Q6P972	>tr|Q6P972|Q6P972_DANRE Tubulin, alpha 2 OS=Danio rerio GN=tuba2 PE=2 SV=1		13	1	11	9	8	9	7	9	8	10	9	8	9	13	5	6	6	10	6	3	8	9	8	9	8				0	0	0	0	0	0	0	0	781700	0	0	542800	0	0	1862300	0	0	0
334	CON__PO76013	>PO76013 SWISS-PROT:O76013|HA6_Keratin, type I cuticular HA6 (Hair keratin, type I HA6)		12	4	1	12	9	4	7	1	2	9	2	1	1	2	8	8	4	1	0	8	1	1	1	1	1			+	0	108330000	3111300	212630	3134700	0	0	1560200	0	0	0	0	1152200	772470	565340	0	0	6753000
0	A0AUR2;F1RBP2;F1RCU5;F1RCA5	>tr|A0AUR2|A0AUR2_DANRE Sarcalumenin OS=Danio rerio GN=srl PE=2 SV=1;>tr|F1RBP2|F1RBP2_DANRE Uncharacterized protein OS=Danio rerio GN=srl PE=4 SV=1;>tr|F1RCU5|F1RCU5_DANRE Uncharacterized protein (Fragment) OS=Danio rerio GN=srl PE=4 SV=1		12	12	0	1	2	9	8	10	10	11	10	5	5	7	5	5	5	9	5	1	2	0	9	8	6				0	0	285300	560170	474710	225180	1171800	3622400	2165600	172780	166750	315780	164860	154340	1298400	1589200	481120	0
141	A8Y5S7;Q6PC69;E9QFD9	>tr|A8Y5S7|A8Y5S7_DANRE Ribosomal protein OS=Danio rerio GN=rpl10a PE=3 SV=1;>sp|Q6PC69|RL10A_DANRE 60S ribosomal protein L10a OS=Danio rerio GN=rpl10a PE=2 SV=1		12	12	11	10	10	9	10	11	7	7	9	7	7	7	6	5	5	4	5	6	3	4	6	6	4				78690000	73372000	47947000	40934000	46084000	32825000	5430500	2774800	1755100	4161800	2345600	2532300	902620	2949100	505800	594410	400320	466740
241	B6IDE8;F1QE56	>tr|B6IDE8|B6IDE8_DANRE Frem3 OS=Danio rerio GN=frem3 PE=2 SV=1;>tr|F1QE56|F1QE56_DANRE Uncharacterized protein (Fragment) OS=Danio rerio GN=frem3 PE=4 SV=1		12	11	4	3	4	10	10	11	1	1	1	1	1	1	0	1	1	3	1	1	2	1	0	2	1				1046300	759670	1148700	1568400	1729400	2045500	0	0	0	0	0	0	0	0	0	334950	0	0
298	B8JLG2	>tr|B8JLG2|B8JLG2_DANRE Novel coagulation factor OS=Danio rerio GN=si:ch1073-188c16.3 PE=3 SV=1		12	3	9	8	7	12	11	10	11	12	8	10	11	12	12	12	8	7	7	6	9	7	5	7	7				143980	0	0	664900	377360	1138300	368270	206710	255150	604360	269410	304410	1581000	1739700	0	0	0	0
349	D1GJ56	>tr|D1GJ56|D1GJ56_DANRE Actn3a OS=Danio rerio GN=actn3a PE=2 SV=1		12	3	4	4	3	10	11	10	9	8	10	10	10	10	6	4	5	8	6	4	7	5	8	5	2				513930	897970	568820	1241300	983550	1513700	811990	1713100	1677900	1300600	1777600	2136000	720180	423450	975610	1100600	854680	285480
382	E7F123	>tr|E7F123|E7F123_DANRE Uncharacterized protein OS=Danio rerio GN=BX005410.1 PE=4 SV=1		12	12	12	10	12	11	10	9	6	11	10	6	7	7	8	8	2	2	2	2	5	2	4	3	7				4341700	3125200	3255500	1391100	2307400	1055200	685190	2279000	1663400	684520	960960	1456200	2173500	1791500	766700	748660	503110	534710
428	E9QCV2;E7F4T0	>tr|E9QCV2|E9QCV2_DANRE Uncharacterized protein OS=Danio rerio GN=si:ch211-24c14.1 PE=4 SV=1;>tr|E7F4T0|E7F4T0_DANRE Uncharacterized protein OS=Danio rerio GN=si:ch211-24c14.1 PE=4 SV=1		12	10	0	0	1	0	1	1	1	2	0	7	8	10	7	5	2	4	0	2	9	7	6	3	3				0	0	0	0	0	0	0	0	0	371270	1098500	418630	137300	152920	209320	112990	0	0
660	F1Q766	>tr|F1Q766|F1Q766_DANRE Uncharacterized protein OS=Danio rerio GN=CKMT2 (1 of 2) PE=3 SV=1		12	7	11	10	11	3	3	3	4	3	6	0	1	1	1	0	3	7	6	0	5	3	7	2	1				17583000	14186000	15126000	459880	283190	439000	295840	163930	568250	0	0	0	0	0	620890	2021500	389270	0
672	F1Q7R4;Q6NYS8	>tr|F1Q7R4|F1Q7R4_DANRE Uncharacterized protein OS=Danio rerio GN=ddost PE=4 SV=1;>sp|Q6NYS8|OST48_DANRE Dolichyl-diphosphooligosaccharide--protein glycosyltransferase 48 kDa subunit OS=Danio rerio GN=ddost PE=2 SV=2		12	12	11	9	9	9	11	9	11	10	9	7	9	10	8	9	4	5	4	3	6	3	5	3	5				4127700	7203900	4359700	4036500	2898600	3425900	4395500	9532800	8978700	3091000	2502000	5412900	3369800	3173500	1654600	1058700	580000	413380
743	F1QCQ7;Q58EG9;O93423;F1R973	>tr|F1QCQ7|F1QCQ7_DANRE Uncharacterized protein OS=Danio rerio GN=stom PE=4 SV=1;>tr|Q58EG9|Q58EG9_DANRE Stom protein OS=Danio rerio GN=stom PE=2 SV=1;>tr|O93423|O93423_DANRE Stomatin OS=Danio rerio GN=stom PE=2 SV=1;>tr|F1R973|F1R973_DANRE Uncharacterized		12	7	9	9	9	11	11	9	9	10	10	6	6	7	8	8	7	4	3	2	4	2	6	4	6				10992000	9698500	9011400	35106000	44005000	24360000	4196100	9673200	8863800	1103400	1693700	1962200	2376400	1993500	2846500	1784600	824760	191770
103	F1QGS7;E7F2U8;E7F459;E7FEC9;F1Q9D0;F1QA71;F1QAY4;F1QG64;F1QIH4;F1RAV8;F1RAY6;F1QAU0;F1QF78;F1QGY1;F1QKN7;F1R0S5;F1RD54;Q6PC60;A7MCA7;B3DJF8;F1R4A4;Q05AK8;Q5BJA5;E7EXF4;E7EZA5;E9QHX5	>tr|F1QGS7|F1QGS7_DANRE Histone H2B OS=Danio rerio GN=zgc:171759 PE=3 SV=1;>tr|E7F2U8|E7F2U8_DANRE Histone H2B OS=Danio rerio GN=CABZ01086354.1 PE=3 SV=1;>tr|E7F459|E7F459_DANRE Histone H2B OS=Danio rerio GN=zgc:114046 PE=3 SV=1;>tr|E7FEC9|E7FEC9_DANRE His		12	8	7	7	6	10	8	9	12	11	8	12	11	11	9	9	8	10	9	7	7	10	9	10	11				38600000	41341000	81077000	48774000	105200000	70652000	302600000	227490000	260450000	257410000	192330000	180140000	95582000	99254000	103720000	76660000	43867000	81257000
857	F1QK57	>tr|F1QK57|F1QK57_DANRE Uncharacterized protein (Fragment) OS=Danio rerio GN=CR339044.1 PE=4 SV=1		12	12	0	3	0	0	0	1	5	6	4	0	0	0	1	0	7	11	11	1	0	0	1	0	0				0	415160	0	0	0	0	519280	387190	426030	0	0	0	0	0	2521900	5275400	4992700	0
1000	F1QZM5	>tr|F1QZM5|F1QZM5_DANRE Uncharacterized protein OS=Danio rerio GN=itm1 PE=4 SV=1		12	11	9	10	9	8	8	7	5	8	8	3	5	4	7	7	4	4	1	1	5	2	3	4	3				11455000	9699800	12651000	6425200	6156200	8045000	3227100	3962800	7247800	1003700	1256200	3524700	1316700	1227600	1192800	1736000	0	0
1026	F1R2S9;Q1LXA8	>tr|F1R2S9|F1R2S9_DANRE Uncharacterized protein OS=Danio rerio GN=ecm2 PE=4 SV=1;>tr|Q1LXA8|Q1LXA8_DANRE Novel protein similar to human extracellular matrix protein 2, female organ and adipocyte specific (ECM2) (Fragment) OS=Danio rerio GN=ecm2 PE=4 SV=1		12	12	5	5	5	8	6	8	8	7	5	11	9	11	9	10	4	9	6	8	7	7	7	4	7				822250	755370	841350	3386800	1678800	3923400	1846200	1783500	726140	3198300	3321000	3808000	3360300	2843300	2844700	6544300	4703300	5187500
1074	F1R6K1;F1R7D5;E9QCT8	>tr|F1R6K1|F1R6K1_DANRE Uncharacterized protein OS=Danio rerio GN=phex PE=4 SV=1;>tr|F1R7D5|F1R7D5_DANRE Uncharacterized protein OS=Danio rerio GN=phex PE=4 SV=1		12	12	5	4	5	7	4	6	4	5	4	4	3	4	4	6	3	5	5	5	10	6	5	2	6				2452600	2203700	2273800	324660	797570	264440	1148700	2594200	2692500	610250	561010	895270	2268900	1860200	901560	752630	466170	627810
1080	F1R731	>tr|F1R731|F1R731_DANRE Uncharacterized protein (Fragment) OS=Danio rerio GN=CABZ01074749.1 PE=4 SV=1		12	12	8	5	6	11	11	11	12	10	11	7	10	10	10	10	10	9	9	8	10	8	10	8	10				2471100	2329500	1614000	7851100	6153500	7108600	5524700	4908400	4961700	1893000	2520800	2353800	3479600	2570100	35636000	21057000	10983000	7488800
1098	F1R8L1	>tr|F1R8L1|F1R8L1_DANRE Uncharacterized protein (Fragment) OS=Danio rerio GN=fgfbp2 PE=4 SV=1		12	12	0	1	1	0	0	1	3	1	1	1	0	0	9	11	8	7	7	2	0	2	8	10	10				0	0	0	0	0	0	247720	0	0	0	0	0	65805000	91719000	3855500	4088200	4524300	557100
1229	Q1RLV2	>tr|Q1RLV2|Q1RLV2_DANRE Uncharacterized protein OS=Danio rerio GN=zgc:136807 PE=2 SV=1		12	12	4	6	6	8	8	9	9	6	6	9	10	8	10	8	8	12	12	10	9	9	9	9	9				3278200	3413600	2811100	5622100	3602500	5978200	3163700	1995200	1920800	6395100	5674700	6236900	20526000	24643000	11129000	16614000	18672000	14479000
1303	Q5RIH8	>tr|Q5RIH8|Q5RIH8_DANRE Novel protein OS=Danio rerio GN=serpina10a PE=2 SV=1		12	12	7	7	6	8	9	8	9	8	4	8	9	5	10	8	7	5	7	7	7	8	8	7	6				1692500	2777400	2634400	9411400	5315300	10034000	3355900	2230700	1951100	5258100	4975900	4841700	9291200	7645800	8365800	10184000	5257300	19636000
1353	Q6DGE4	>tr|Q6DGE4|Q6DGE4_DANRE Tyrosinase-related protein 1b OS=Danio rerio GN=tyrp1b PE=2 SV=1		12	11	11	9	11	6	10	4	2	3	3	2	2	3	3	7	2	0	1	0	0	1	0	1	2				61386000	33148000	31771000	1482400	2276800	1141900	0	495440	358200	0	0	755860	532180	1053500	677320	0	0	0
1360	Q6DGX6	>tr|Q6DGX6|Q6DGX6_DANRE Crystallin gamma EM2-8 OS=Danio rerio GN=crygm2d8 PE=2 SV=2		12	2	12	12	9	3	1	0	1	4	1	0	0	0	0	0	0	0	0	0	0	0	0	0	1				193370000	479110000	102010000	0	0	0	0	0	0	0	0	0	0	0	0	0	0	0
1497	Q6PVV8;E9QJA9;E9QCC2	>tr|Q6PVV8|Q6PVV8_DANRE SPARC OS=Danio rerio GN=sparc PE=2 SV=1;>tr|E9QJA9|E9QJA9_DANRE Uncharacterized protein OS=Danio rerio GN=sparc PE=4 SV=1		12	12	1	0	1	8	6	9	11	9	9	10	10	10	8	10	9	7	9	8	10	10	6	8	7				0	0	0	4272200	1794100	5761100	50905000	13242000	6107200	37392000	37779000	28940000	10140000	16593000	9945500	31849000	52873000	57428000
1611	Q804H2;A2BFV8	>tr|Q804H2|Q804H2_DANRE Annexin 1a OS=Danio rerio GN=anxa1a PE=2 SV=1;>tr|A2BFV8|A2BFV8_DANRE Annexin A1a (Fragment) OS=Danio rerio GN=anxa1a PE=3 SV=1		12	12	11	12	11	8	10	10	11	10	10	11	9	10	8	10	7	9	7	7	7	8	6	7	7				6675600	3433200	7103200	3231600	2899300	3888100	5281100	4991200	4972500	5017900	4980900	8291000	2321900	3145800	2881000	4191500	3256500	3162500
342	CON__Q9NSB4	>Q9NSB4 TREMBL:Q9NSB4|Hb2_Keratin, type II cuticular Hb2 (Hair keratin, type II Hb2) - Homo sapiens (Human).		11	4	4	10	9	4	5	3	1	4	1	1	4	3	6	5	4	1	0	6	1	1	1	2	0			+	0	154340000	34973000	2232700	1051000	0	0	2787400	0	0	0	0	7458100	3539700	2656900	0	0	48823000
1326	Q642H9	>sp|Q642H9|RS4X_DANRE 40S ribosomal protein S4, X isoform OS=Danio rerio GN=rps4x PE=2 SV=3		11	11	8	10	9	10	8	8	8	9	8	8	9	8	7	5	3	4	1	1	4	2	6	3	4				4015700	3694200	6125800	3712700	3937500	3480600	5924200	14495000	13811000	3338000	4141300	6428700	2309900	2106100	1486900	1080300	0	0
1629	Q90485	>sp|Q90485|HBB2_DANRE Hemoglobin subunit beta-2 OS=Danio rerio GN=ba2 PE=1 SV=3		11	2	1	2	0	0	1	2	9	10	9	6	7	7	4	6	10	10	10	10	11	9	5	7	6				0	0	0	0	0	0	942730	2626100	764670	0	0	0	0	138060	6485400	28542000	9041800	11071000
1639	Q98TZ8;E7F6B9	>sp|Q98TZ8|FLOT2_DANRE Flotillin-2a OS=Danio rerio GN=flot2a PE=2 SV=2;>tr|E7F6B9|E7F6B9_DANRE Uncharacterized protein OS=Danio rerio GN=flot2a PE=4 SV=1		11	6	11	11	11	10	10	10	9	8	9	5	8	9	7	7	1	3	0	2	5	2	5	3	2				9413400	9935600	11187000	10476000	8188500	6908500	1525500	4977400	3485400	311690	1259800	1803400	910210	497960	0	161900	0	74326
90	A5WWG8;O57521;E7EZ16;F1Q9X9;E7F4F1;F1R0C3	>tr|A5WWG8|A5WWG8_DANRE Heat shock protein 90kDa alpha (Cytosolic), class B member 1 OS=Danio rerio GN=hsp90ab1 PE=3 SV=1;>sp|O57521|HS90B_DANRE Heat shock protein HSP 90-beta OS=Danio rerio GN=hsp90ab1 PE=2 SV=2;>tr|E7EZ16|E7EZ16_DANRE Uncharacterized pro		11	5	5	6	5	7	6	5	7	8	7	7	8	9	7	9	7	7	7	10	9	9	8	6	6				2826700	3275500	4719600	1026400	880870	968460	1955800	2489000	2224700	2309200	2059800	2150600	3007500	2346400	1920500	2491400	1255000	2502800
200	B0UY86	>tr|B0UY86|B0UY86_DANRE Novel protein similar to crystallin, gamma family OS=Danio rerio GN=crygm2d11 PE=4 SV=1		11	2	10	9	9	3	2	1	2	5	3	0	0	0	0	0	0	0	0	0	0	0	0	0	0				273640000	998500000	370130000	0	0	0	0	4557300	0	0	0	0	0	0	0	0	0	0
217	B3DFP9	>tr|B3DFP9|B3DFP9_DANRE Uncharacterized protein OS=Danio rerio GN=zgc:193613 PE=2 SV=1		11	11	8	5	9	10	8	10	9	9	8	8	8	9	7	7	5	7	8	9	10	8	6	5	7				21728000	37589000	32794000	60554000	57457000	56323000	19432000	33948000	24353000	31690000	25093000	22412000	48987000	32473000	10686000	12751000	14566000	12082000
220	B3DG37;Q90486	>tr|B3DG37|B3DG37_DANRE Ba1 protein OS=Danio rerio GN=ba1 PE=2 SV=1;>sp|Q90486|HBB1_DANRE Hemoglobin subunit beta-1 OS=Danio rerio GN=ba1 PE=1 SV=3		11	1	2	3	1	1	2	3	9	10	9	8	8	8	6	5	8	8	8	9	9	7	3	6	5				0	4293400	0	0	0	1091000	32091000	51335000	51797000	4336900	4807200	6526500	1699600	1827500	121690000	80857000	28386000	23130000
224	B3DHE9;Q14TH1	>tr|B3DHE9|B3DHE9_DANRE C6ast1 protein OS=Danio rerio GN=c6ast1 PE=2 SV=1;>tr|Q14TH1|Q14TH1_DANRE Astacin like metallo-protease OS=Danio rerio GN=c6ast1 PE=2 SV=1		11	11	0	1	0	1	0	1	7	7	4	9	7	7	8	8	7	10	11	11	8	10	11	10	10				0	0	0	0	0	0	2380600	1362400	1821500	5340200	2370000	2240000	5761200	7883200	8837500	8767800	9941200	13098000
405	E7F2Q5	>tr|E7F2Q5|E7F2Q5_DANRE Uncharacterized protein OS=Danio rerio GN=CABZ01112729.1 PE=4 SV=1		11	11	6	6	7	6	4	6	10	11	10	9	9	10	8	9	8	6	5	7	6	7	3	4	10				2376700	3017600	1617900	4672400	4929200	5590200	14127000	12353000	12528000	32317000	20118000	19145000	21889000	26994000	6050900	12872000	9170900	5195800
481	E7F9N7	>tr|E7F9N7|E7F9N7_DANRE Uncharacterized protein OS=Danio rerio GN=CABZ01078858.1 PE=4 SV=1		11	11	7	6	6	3	6	3	7	9	9	7	7	9	6	6	3	3	1	4	6	3	3	3	2				11113000	20656000	18837000	6840700	6581900	5817800	18344000	28219000	34914000	13280000	45294000	24309000	16900000	7749300	15893000	5633900	0	2633800
671	F1Q7R2	>tr|F1Q7R2|F1Q7R2_DANRE Uncharacterized protein OS=Danio rerio GN=chad PE=4 SV=1		11	11	4	2	4	9	6	8	6	5	6	7	8	7	5	6	6	9	9	9	8	9	10	10	7				691420	1452000	671330	6387200	5818400	7557300	4736500	2032800	2176600	10469000	11016000	11737000	4515700	4474900	3235800	12672000	8060900	42385000
685	F1Q8J4	>tr|F1Q8J4|F1Q8J4_DANRE Uncharacterized protein OS=Danio rerio GN=acadvl PE=3 SV=1		11	9	9	8	10	11	11	9	3	3	4	0	1	2	0	2	3	4	0	0	0	0	1	1	0				2069100	3258500	2791100	2565200	2809000	2343000	0	1937600	916590	0	0	0	0	0	1412000	1248100	0	0
793	F1QG51	>tr|F1QG51|F1QG51_DANRE Uncharacterized protein OS=Danio rerio GN=FMOD (1 of 2) PE=4 SV=1		11	11	6	2	5	11	11	11	6	6	7	4	4	5	4	4	4	6	4	4	6	6	4	2	1				7995900	21349000	10272000	120360000	69664000	127460000	14214000	8215600	3372800	9180600	4802200	5659800	3558600	6092800	1984700	6242300	3604400	3437600
796	F1QG85;F1QGX0	>tr|F1QG85|F1QG85_DANRE Integrin beta OS=Danio rerio GN=itgb1a PE=3 SV=1		11	10	8	7	7	9	11	9	7	10	9	7	7	7	7	7	7	4	3	5	6	6	3	4	7				10565000	6826600	4764500	11187000	12464000	7081400	2368200	5369500	5324000	915640	1096500	2057800	2907800	2372200	3077200	3982200	1120100	1995200
820	F1QHM3	>tr|F1QHM3|F1QHM3_DANRE Uncharacterized protein (Fragment) OS=Danio rerio GN=CABZ01017116.1 PE=4 SV=1		11	11	9	9	9	3	0	2	11	11	9	9	0	0	0	0	3	5	1	0	0	0	1	0	0				1467000	4987600	1686200	133310	0	70553	11569000	2109200	1598700	1009300	0	0	0	0	560890	471750	0	0
856	F1QK29	>tr|F1QK29|F1QK29_DANRE Uncharacterized protein OS=Danio rerio GN=zgc:154001 PE=4 SV=1		11	11	5	4	3	4	4	9	6	5	7	7	6	5	10	9	5	9	10	7	5	7	8	7	6				1627800	1904700	2213100	2876200	2901600	2317900	2885900	2073400	1939700	3952200	5004700	3504300	15956000	20110000	10371000	7778000	7579300	6462500
915	F1QRA8;Q5SP98;E7F419	>tr|F1QRA8|F1QRA8_DANRE Uncharacterized protein OS=Danio rerio GN=paplnb PE=4 SV=1;>tr|Q5SP98|Q5SP98_DANRE Novel protein similar to vertebrate ADAMTS protein family OS=Danio rerio GN=paplnb PE=4 SV=1		11	11	0	0	0	0	0	0	0	1	0	0	0	0	2	1	0	0	0	0	0	0	11	1	0				0	0	0	0	0	0	0	0	0	0	0	0	199670	0	0	0	0	0
199	F1QTV4;B0UY61;F1Q824;F1Q6R4;B0UY60;F1QTZ6	>tr|F1QTV4|F1QTV4_DANRE Uncharacterized protein (Fragment) OS=Danio rerio GN=neb PE=4 SV=1;>tr|B0UY61|B0UY61_DANRE Novel protein similar to vertebrate nebulin (NEB) OS=Danio rerio GN=neb PE=4 SV=1		11	11	0	0	1	4	2	6	7	8	7	3	6	8	2	0	5	7	7	0	2	0	8	3	1				0	0	0	433440	220920	160130	354680	674010	925060	390810	391190	1186300	248520	0	683750	1122200	909960	0
979	F1QXD5;A1KXD7	>tr|F1QXD5|F1QXD5_DANRE Uncharacterized protein OS=Danio rerio GN=col10a1 PE=4 SV=1		11	11	9	10	9	7	9	7	11	11	11	10	11	10	11	11	10	8	7	6	7	6	8	8	9				75713000	102020000	107000000	8248000	17703000	10457000	197160000	171870000	205400000	55745000	73111000	93689000	688320000	695670000	110200000	80482000	81318000	35472000
302	F1R6L6;B8JLQ3;E7EY75;E9QB18	>tr|F1R6L6|F1R6L6_DANRE Uncharacterized protein OS=Danio rerio GN=ncl PE=4 SV=1;>tr|B8JLQ3|B8JLQ3_DANRE Novel protein similar to H.sapiens NCL, nucleolin (NCL, zgc:152810) OS=Danio rerio GN=ncl PE=4 SV=1;>tr|E7EY75|E7EY75_DANRE Uncharacterized protein OS=D		11	11	2	0	0	4	4	7	8	8	5	8	8	9	7	7	2	4	3	4	6	7	5	5	6				0	0	0	239750	277830	387250	1534000	968490	876710	1600700	1797100	1146200	986240	815820	610860	536420	593720	846550
864	F1RAC0;F1QKK8	>tr|F1RAC0|F1RAC0_DANRE Uncharacterized protein OS=Danio rerio GN=si:ch1073-459j12.1 PE=4 SV=1;>tr|F1QKK8|F1QKK8_DANRE Uncharacterized protein OS=Danio rerio GN=si:ch1073-459j12.1 PE=4 SV=1		11	10	1	0	0	1	1	2	6	4	6	7	9	8	7	8	7	7	6	8	8	6	6	9	9				0	0	0	0	0	276170	484990	707980	315350	2658800	1501200	2487300	893800	615550	1580200	1841900	1480500	11586000
1130	F1RBA4	>tr|F1RBA4|F1RBA4_DANRE Uncharacterized protein (Fragment) OS=Danio rerio GN=dspa PE=4 SV=1		11	9	2	1	1	1	1	3	10	6	5	10	11	10	8	6	2	2	0	5	6	7	7	6	5				361810	0	0	0	0	65742	456240	242780	146140	875750	1248300	1253700	427590	569260	0	0	0	180890
1196	Q1LUC6	>tr|Q1LUC6|Q1LUC6_DANRE Novel protein similar to vertebrate lipocalin 7 (LCN7) OS=Danio rerio GN=si:dkey-158b13.1 PE=3 SV=1		11	11	4	6	3	11	10	11	4	3	3	1	1	1	0	0	1	2	0	2	0	1	0	1	1				1449000	3008000	1704100	7855400	13387000	7843700	877740	571440	873330	0	0	0	0	0	0	1114900	0	1373400
1198	Q1LUV0	>tr|Q1LUV0|Q1LUV0_DANRE Novel protein containing a cystatin domain OS=Danio rerio GN=si:ch211-262h13.5 PE=4 SV=1		11	11	6	4	5	7	8	6	7	7	7	8	8	7	8	8	7	10	11	11	9	8	9	10	10				4212100	3846700	4825400	12211000	8270300	17828000	47101000	16507000	15444000	63154000	79830000	67042000	120350000	134210000	116380000	113890000	187170000	205280000
1142	Q1LXG1;F1RCW4	>tr|Q1LXG1|Q1LXG1_DANRE Novel protein similar to vertebrate retinol dehydrogenase family (Fragment) OS=Danio rerio GN=rdh5 PE=3 SV=1;>tr|F1RCW4|F1RCW4_DANRE Uncharacterized protein OS=Danio rerio GN=rdh5 PE=3 SV=1		11	11	11	9	10	1	1	1	0	0	0	0	0	0	0	0	0	1	0	0	0	1	0	0	1				15358000	12928000	13603000	0	0	0	0	0	0	0	0	0	0	0	0	0	0	0
1396	Q6NUV2;C3PTE8;E7F428;Q7T2D2;F1QLG1	>tr|Q6NUV2|Q6NUV2_DANRE Novel protein similar to vertebrate arrestin beta 1 (ARRB1, zgc:66109) OS=Danio rerio GN=CH211-170H3.1 PE=2 SV=1		11	11	10	9	10	0	0	0	0	0	0	0	0	0	0	0	0	0	0	0	0	0	0	0	0				18774000	14179000	19426000	0	0	0	0	0	0	0	0	0	0	0	0	0	0	0
1404	Q6NWC3;E9QDR0	>tr|Q6NWC3|Q6NWC3_DANRE Ribosomal protein S2 OS=Danio rerio GN=rps2 PE=2 SV=1		11	11	6	6	9	7	8	10	8	9	8	7	7	7	5	7	2	1	0	0	2	1	3	1	2				15750000	26287000	28946000	5003800	5730300	2694200	6639300	10752000	17366000	4537900	4837800	5543200	5990300	4454600	0	0	0	0
1422	Q6NYQ7	>tr|Q6NYQ7|Q6NYQ7_DANRE Nicotinamide nucleotide transhydrogenase OS=Danio rerio GN=nnt PE=2 SV=1		11	11	4	3	3	6	6	7	7	9	9	7	8	9	4	4	1	3	0	2	0	1	1	1	0				1168500	660380	0	979460	763480	746430	2587000	2977500	2925100	934680	2420100	2064500	639770	857810	0	429580	0	177220
1442	Q6P3H9	>tr|Q6P3H9|Q6P3H9_DANRE Uncharacterized protein OS=Danio rerio GN=SLC3A2 (1 of 3) PE=2 SV=1		11	11	10	9	10	9	10	9	7	7	6	5	6	6	4	5	1	2	1	1	7	1	2	1	1				21699000	13079000	21605000	2631300	2251700	1526100	1036100	3079700	2560400	698320	852430	1345300	1172500	1646700	0	6055400	0	0
1448	Q6P5K3;Q9PV90	>tr|Q6P5K3|Q6P5K3_DANRE Rplp0 protein OS=Danio rerio GN=rplp0 PE=2 SV=1;>sp|Q9PV90|RLA0_DANRE 60S acidic ribosomal protein P0 OS=Danio rerio GN=rplp0 PE=2 SV=1		11	11	11	10	11	11	10	8	9	9	8	10	9	9	9	9	3	6	3	6	5	6	8	6	5				36595000	34322000	29667000	11900000	17064000	12674000	2374300	2198000	2426200	996450	876200	1761400	1800000	1413000	378410	388580	214950	250410
1465	Q6PBW4	>tr|Q6PBW4|Q6PBW4_DANRE Peptidyl-prolyl cis-trans isomerase OS=Danio rerio GN=ppib PE=2 SV=1		11	11	10	8	7	10	11	10	11	10	7	11	9	11	10	9	8	8	9	11	9	9	8	8	8				4841100	9303900	7520900	12247000	8607300	10817000	14515000	8253100	9147100	13727000	11543000	10154000	13298000	15135000	4398800	7279500	7103300	14933000
1511	Q6TNP9	>tr|Q6TNP9|Q6TNP9_DANRE Tubulin, alpha 2 OS=Danio rerio GN=tuba8l PE=2 SV=1		11	2	10	8	6	8	7	8	9	10	8	9	10	10	8	7	4	7	3	3	8	9	7	6	8				522580	467900	0	0	243340	0	329790	965080	501720	528060	569500	1052900	393240	391930	0	0	0	0
1550	Q7T334	>tr|Q7T334|Q7T334_DANRE Malate dehydrogenase OS=Danio rerio GN=MDH2 PE=2 SV=1		11	11	10	9	9	8	11	6	0	2	1	0	0	0	0	0	0	0	0	0	1	1	1	2	1				8871200	10190000	12658000	795070	741920	827020	0	0	0	0	0	0	0	0	0	0	0	0
1584	Q7ZVL5	>tr|Q7ZVL5|Q7ZVL5_DANRE Serine (Or cysteine) proteinase inhibitor, clade E (Nexin, plasminogen activator inhibitor type 1), member 2 OS=Danio rerio GN=serpine2 PE=2 SV=1		11	11	6	5	6	8	7	7	8	6	7	6	9	9	9	9	9	7	7	10	8	10	10	7	11				1491000	1527900	1738700	1745400	2007100	2021300	1750000	1930400	1781700	4877100	3460500	3764500	6722300	9448300	2313400	3666100	3267600	12912000
1614	Q8AX99;F1Q9X1;E9QFR8	>tr|Q8AX99|Q8AX99_DANRE Actn3b OS=Danio rerio GN=actn3b PE=2 SV=1;>tr|F1Q9X1|F1Q9X1_DANRE Uncharacterized protein OS=Danio rerio GN=actn2 PE=4 SV=1;>tr|E9QFR8|E9QFR8_DANRE Uncharacterized protein OS=Danio rerio GN=actn2 PE=4 SV=1		11	2	4	4	3	10	11	9	9	9	11	11	10	11	7	4	6	10	8	5	9	7	9	6	2				0	0	0	69080	74707	0	0	151890	162760	61876	0	314490	0	0	0	103890	137740	0
1631	Q90WX5;B8JL40;Q5YKG4;F1QHJ3;B8JL39	>tr|Q90WX5|Q90WX5_DANRE Cone transducin alpha subunit OS=Danio rerio GN=gnat2 PE=2 SV=1;>tr|B8JL40|B8JL40_DANRE Guanine nucleotide binding protein (G protein), alpha transducing activity polypeptide 2 (Fragment) OS=Danio rerio GN=gnat2 PE=4 SV=1		11	9	10	9	10	2	2	1	2	2	3	1	2	3	2	1	1	1	0	0	0	1	0	0	2				34273000	13490000	82706000	870070	778900	0	659850	937310	729470	0	364780	432830	589720	0	0	0	0	0
341	CON__QQ6ISB0;CON__Q9NSB2	>QQ6ISB0 TREMBL:Q6ISB0|Keratin, hair, basic, 4 - Homo sapiens (Human).;>Q9NSB2 TREMBL:Q9NSB2|Hb4_Keratin, type II cuticular Hb4 (Hair keratin, type II Hb4) - Homo sapiens (Human).		10	3	2	5	5	4	1	2	2	5	6	3	6	8	8	8	7	1	1	6	5	4	2	4	7			+	0	0	0	0	0	0	0	0	664740	0	689160	224330	210090	234070	164690	0	0	91381
1179	Q08BI9	>sp|Q08BI9|C109A_DANRE Coiled-coil domain-containing protein 109A OS=Danio rerio GN=ccdc109a PE=2 SV=1		10	2	10	7	8	9	10	8	7	6	8	5	6	6	6	5	3	3	1	2	3	2	5	3	3				3209500	3420200	3191900	3915100	3854600	3718500	1362100	3452700	2420900	740050	3996700	1737600	1671700	1187500	612200	472000	0	180280
1491	Q6PH57;Q803H5	>sp|Q6PH57|GBB1_DANRE Guanine nucleotide-binding protein G(I)/G(S)/G(T) subunit beta-1 OS=Danio rerio GN=gnb1 PE=2 SV=1;>tr|Q803H5|Q803H5_DANRE Gnb1l protein OS=Danio rerio GN=gnb1l PE=2 SV=1		10	7	10	9	8	9	9	9	8	8	8	5	5	6	6	4	3	4	3	2	4	3	6	4	2				18016000	13066000	23755000	8312700	11647000	7807800	3546400	7631600	6437200	1985700	2111400	2633100	1890000	1657300	556720	1310100	786080	380420
98	A7E2K7	>tr|A7E2K7|A7E2K7_DANRE Novel protein similar to crystallin, gamma family OS=Danio rerio GN=crygm2d12 PE=2 SV=1		10	3	9	9	9	0	1	0	0	7	1	0	0	0	2	1	1	1	1	0	1	0	1	1	1				9992900	250000000	59462000	0	0	0	0	161970	0	0	0	0	0	0	0	0	0	0
99	A7E2K8;Q5XTP2;Q5XTP3	>tr|A7E2K8|A7E2K8_DANRE Novel protein (MGC:171792) OS=Danio rerio GN=crygm2d14 PE=2 SV=1		10	3	10	7	5	3	1	0	3	4	2	0	0	0	1	2	0	0	0	0	1	0	0	1	0				790380	0	0	0	0	0	0	0	0	0	0	0	0	0	0	0	0	0
107	A7YT47	>tr|A7YT47|A7YT47_DANRE Hadha protein OS=Danio rerio GN=hadha PE=2 SV=1		10	7	5	6	5	8	8	8	5	9	9	3	4	4	1	2	5	5	2	1	2	0	5	2	4				0	461680	0	611040	673250	495170	0	577900	215970	0	0	0	0	0	284150	0	246960	0
235	B5DC62	>tr|B5DC62|B5DC62_DANRE Collagen XII alpha-1 chain (Fragment) OS=Danio rerio GN=col12a1 PE=2 SV=1		10	8	4	6	3	7	7	9	4	6	5	4	4	5	6	6	4	9	8	8	10	8	6	10	6				1361700	1416600	1315600	1185200	2578800	1521000	872710	1427800	1711400	1575100	2358700	1174800	6372200	8173700	4148100	5199900	3983900	4744800
259	B8A4T6;E9QHV3	>tr|B8A4T6|B8A4T6_DANRE Collagen, type IX, alpha 1 OS=Danio rerio GN=col9a1 PE=4 SV=1;>tr|E9QHV3|E9QHV3_DANRE Uncharacterized protein OS=Danio rerio GN=col9a1 PE=4 SV=1		10	10	5	3	3	9	8	10	6	5	3	8	7	8	7	8	4	3	3	5	6	5	3	2	5				1817800	1465000	992250	354540000	164510000	158880000	5248600	1504700	999460	62092000	85423000	96256000	18372000	26670000	3342800	4944000	3165500	23606000
294	B8JL33	>tr|B8JL33|B8JL33_DANRE Novel protein similar to H.sapiens LOXL4, lysyl oxidase-like 4 (LOXL4) (Fragment) OS=Danio rerio GN=loxl4 PE=4 SV=1		10	1	6	4	3	2	5	4	8	8	8	7	6	9	9	8	4	4	4	1	6	2	3	4	6				0	0	0	0	0	0	0	0	0	0	0	0	0	0	0	0	0	0
462	E7F829;E9QI37;E7F249	>tr|E7F829|E7F829_DANRE Uncharacterized protein OS=Danio rerio GN=si:dkey-24n17.4 PE=4 SV=1;>tr|E9QI37|E9QI37_DANRE Uncharacterized protein OS=Danio rerio GN=si:dkey-24n17.4 PE=4 SV=1		10	9	4	4	3	4	4	5	9	9	6	9	9	9	8	7	8	8	6	7	10	6	5	5	8				383390	401150	367180	275810	440490	448340	1716100	1909700	1193500	3551800	2142300	3446100	2088500	2107200	1774500	2095200	1198100	2028500
682	F1Q8A0	>tr|F1Q8A0|F1Q8A0_DANRE Uncharacterized protein OS=Danio rerio GN=ctsk PE=3 SV=1		10	10	2	2	2	7	5	7	9	6	6	10	8	7	8	7	6	5	6	6	7	6	5	6	4				0	0	0	2541500	1701500	6174300	2664400	2906300	4110600	5330100	4386600	2781700	3498200	4181000	2041100	5492100	7504800	5104400
834	F1QJ13;F1R387;F1QXW6	>tr|F1QJ13|F1QJ13_DANRE Uncharacterized protein OS=Danio rerio GN=si:dkeyp-94b4.3 PE=4 SV=1;>tr|F1R387|F1R387_DANRE Uncharacterized protein (Fragment) OS=Danio rerio GN=si:dkeyp-94b4.3 PE=4 SV=1		10	10	3	3	5	3	2	1	6	7	4	6	5	9	9	10	2	4	3	3	8	2	5	2	4				761160	365550	780670	125930	144820	0	505680	917480	261700	619860	1240500	1146400	2221600	4886000	57206	262450	181750	132260
874	F1QLW6	>tr|F1QLW6|F1QLW6_DANRE Uncharacterized protein OS=Danio rerio GN=zgc:193598 PE=4 SV=1		10	10	0	0	0	0	0	1	5	2	2	6	7	6	5	6	4	7	7	5	7	7	8	8	7				0	0	0	0	0	0	632150	523160	777540	2109700	986240	1953500	2677300	2453700	1076700	6886800	13308000	8415700
895	F1QNY5;Q6TEN9	>tr|F1QNY5|F1QNY5_DANRE Uncharacterized protein OS=Danio rerio GN=cpne1 PE=4 SV=1;>tr|Q6TEN9|Q6TEN9_DANRE Copine III OS=Danio rerio GN=cpne1 PE=2 SV=1		10	10	9	9	8	8	7	6	8	8	7	3	3	3	3	3	3	4	3	1	2	1	4	1	2				3350100	3184500	3176800	1534300	2547400	1237300	910380	1491100	2234800	427110	424570	636310	483420	492290	792490	584820	352980	0
901	F1QPX0	>tr|F1QPX0|F1QPX0_DANRE Uncharacterized protein (Fragment) OS=Danio rerio GN=CABZ01060124.1 PE=4 SV=1		10	10	1	0	2	4	3	3	2	2	2	6	5	5	4	5	3	6	7	7	6	8	7	2	7				0	0	548870	703460	964440	730880	657210	611020	783750	2327200	1399900	650920	1184000	635900	799870	1434900	1903400	3825900
960	F1QV28;F1R514	>tr|F1QV28|F1QV28_DANRE Uncharacterized protein OS=Danio rerio GN=si:ch211-9a18.2 PE=3 SV=1;>tr|F1R514|F1R514_DANRE Uncharacterized protein OS=Danio rerio GN=si:ch211-9a18.2 PE=3 SV=1		10	3	8	8	7	5	6	5	7	7	7	7	6	8	6	5	6	4	4	3	6	7	4	5	5				0	0	0	0	0	0	0	0	0	0	0	478660	0	0	0	0	0	0
970	F1QWE6	>tr|F1QWE6|F1QWE6_DANRE Uncharacterized protein (Fragment) OS=Danio rerio GN=CT485674.1 PE=4 SV=1		10	9	0	1	0	1	0	1	1	2	2	9	7	8	6	5	2	2	0	5	7	8	6	4	7				0	0	0	0	0	0	0	0	191760	1675000	3132700	2483200	878140	808140	777630	185260	0	618760
809	F1R0G9;F1QH69;F1R5Y8;F1R0X3	>tr|F1R0G9|F1R0G9_DANRE Uncharacterized protein OS=Danio rerio GN=slc25a12 PE=3 SV=1;>tr|F1QH69|F1QH69_DANRE Uncharacterized protein OS=Danio rerio GN=slc25a12 PE=3 SV=1;>tr|F1R5Y8|F1R5Y8_DANRE Uncharacterized protein (Fragment) OS=Danio rerio GN=slc25a12		10	10	9	7	9	8	8	8	6	8	8	3	4	6	4	4	8	10	6	2	3	1	8	8	3				4689800	4648900	4816600	2897100	2784900	2885000	1133900	3093200	3977100	689360	1864800	1722400	2789400	1907600	3698900	3027900	1587900	601290
1116	F1R9V3	>tr|F1R9V3|F1R9V3_DANRE Uncharacterized protein OS=Danio rerio GN=hspa8l PE=3 SV=1		10	1	10	10	10	9	9	6	8	9	8	9	9	9	9	9	6	7	4	7	8	7	7	7	7				0	381490	0	0	0	0	0	0	0	0	0	0	0	0	0	0	0	0
1210	Q1LWH1	>tr|Q1LWH1|Q1LWH1_DANRE Novel protein similar to vertebrate ribosomal protein S16 (RPS16) OS=Danio rerio GN=rps16 PE=2 SV=1		10	10	7	7	8	9	8	8	8	9	9	8	9	10	7	8	6	5	3	4	6	5	6	8	6				1032000	1159000	2680100	2626500	3103200	1841000	3893500	5875700	7708700	3142700	3004300	5550900	1524800	1813700	549450	429330	223470	194370
1337	Q66IB6	>tr|Q66IB6|Q66IB6_DANRE High-mobility group box 2 OS=Danio rerio GN=hmgb2l PE=2 SV=1		10	9	5	5	4	4	5	7	6	6	6	5	6	5	4	6	6	5	3	6	4	4	6	3	4				5632300	3632900	3498200	3553400	6921700	6655000	5310300	3206300	4643000	5414500	5516300	2802000	3066300	4115700	2539500	1763800	1550200	3514600
1369	Q6DHU3;F1QP28	>tr|Q6DHU3|Q6DHU3_DANRE Uncharacterized protein OS=Danio rerio GN=zgc:92061 PE=2 SV=1;>tr|F1QP28|F1QP28_DANRE Uncharacterized protein (Fragment) OS=Danio rerio GN=si:rp71-1n18.1 PE=4 SV=1		10	7	4	9	6	1	2	1	7	9	7	3	1	2	1	0	1	2	0	1	1	0	2	1	0				1015600	2016900	576220	0	0	0	36736000	8378900	3508400	2693000	0	0	0	0	0	0	0	0
1387	Q6IQD7;E9QIK4;E9QC40;E9QBH4;E9QI25	>tr|Q6IQD7|Q6IQD7_DANRE Uncharacterized protein OS=Danio rerio GN=tpm2 PE=2 SV=1;>tr|E9QIK4|E9QIK4_DANRE Uncharacterized protein OS=Danio rerio GN=tpm2 PE=4 SV=1;>tr|E9QC40|E9QC40_DANRE Uncharacterized protein OS=Danio rerio GN=tpm2 PE=3 SV=1;>tr|E9QBH4|E9		10	3	1	1	0	7	7	7	6	7	6	6	5	8	5	7	9	7	8	5	2	5	6	4	5				0	0	0	129680	113810	192540	241800	198440	273360	0	0	0	0	0	1742700	1467100	2687800	0
1457	Q6P981;Q9W6A9;F1R8Z7	>tr|Q6P981|Q6P981_DANRE Opn1sw1 protein OS=Danio rerio GN=opn1sw1 PE=2 SV=1;>sp|Q9W6A9|OP1S1_DANRE Opsin-1, short-wave-sensitive 1 OS=Danio rerio GN=opn1sw1 PE=1 SV=2;>tr|F1R8Z7|F1R8Z7_DANRE Uncharacterized protein (Fragment) OS=Danio rerio GN=opn1sw1 PE=4		10	10	10	10	10	1	1	0	2	6	3	0	1	0	3	2	1	0	0	0	0	0	0	0	1				381060000	272450000	505480000	0	0	0	79391	420310	2746600	0	0	0	116890	128430	0	0	0	0
1462	Q6PBN3	>tr|Q6PBN3|Q6PBN3_DANRE Retinal degradation slow 4 OS=Danio rerio GN=prph2b PE=2 SV=1		10	9	9	8	10	0	2	0	0	0	0	0	0	0	0	0	1	0	0	0	0	1	0	1	0				96590000	44792000	45688000	0	2230200	0	0	0	0	0	0	0	0	0	0	0	0	0
1489	Q6PGX4	>tr|Q6PGX4|Q6PGX4_DANRE Uncharacterized protein OS=Danio rerio GN=zgc:63663 PE=2 SV=1		10	1	9	9	9	8	8	6	8	10	7	9	10	9	9	9	5	8	4	7	7	7	7	7	6				0	370150	0	0	0	0	0	0	0	0	0	0	0	0	0	0	0	0
1526	Q7SXT1;E9QH66;E9QEJ8	>tr|Q7SXT1|Q7SXT1_DANRE Acid phosphatase 5a, tartrate resistant OS=Danio rerio GN=acp5a PE=2 SV=1;>tr|E9QH66|E9QH66_DANRE Uncharacterized protein OS=Danio rerio GN=acp5a PE=4 SV=1;>tr|E9QEJ8|E9QEJ8_DANRE Uncharacterized protein OS=Danio rerio GN=acp5a PE=4		10	10	2	1	2	2	4	3	7	7	6	6	4	7	4	5	5	7	9	7	9	7	3	6	5				322750	0	737140	0	360970	412800	10801000	9586500	9416200	4300900	3865900	6813700	968910	824460	36651000	41930000	37461000	57557000
338	CON__Q14532	>Q14532 TREMBL:Q14532|HA2_Keratin, type I cuticular HA2 (Hair keratin, type I HA2)		9	2	2	7	8	4	6	1	5	7	3	1	2	2	5	5	3	2	1	5	2	3	2	2	2			+	0	3216100	0	0	0	0	0	0	0	0	0	0	0	0	0	0	0	0
1168	O42248	>sp|O42248|GBLP_DANRE Guanine nucleotide-binding protein subunit beta-2-like 1 OS=Danio rerio GN=gnb2l1 PE=2 SV=1		9	9	9	9	4	0	0	0	2	5	3	1	1	2	0	0	0	0	0	0	1	0	0	0	1				1983500	17029000	1665500	0	0	0	356250	306180	471400	0	0	202290	0	0	0	0	0	0
1393	Q6IQP3	>sp|Q6IQP3|CALUA_DANRE Calumenin-A OS=Danio rerio GN=calua PE=2 SV=1		9	9	0	1	0	1	1	0	8	4	3	8	7	7	6	4	1	0	2	5	1	3	2	1	3				0	0	0	0	0	0	5914300	2516100	1979300	10360000	11982000	4814700	7065400	9414000	0	0	7133200	3917700
118	A8E5G1	>tr|A8E5G1|A8E5G1_DANRE Anxa2b protein OS=Danio rerio GN=anxa2b PE=2 SV=1		9	9	3	2	2	8	6	8	2	3	3	0	0	0	0	0	0	0	1	0	0	0	0	0	0				240800	220040	332210	1118400	1722000	662330	226080	215130	245420	0	0	0	0	0	0	0	0	0
124	A8E7E2	>tr|A8E7E2|A8E7E2_DANRE Novel protein containing multiple sushi domains (SCR repeat) OS=Danio rerio GN=cfh PE=4 SV=1		9	0	1	0	1	8	8	9	8	7	5	6	8	8	7	5	4	4	1	5	2	5	3	1	6				0	0	0	370330	354930	428250	208610	0	0	0	0	0	0	0	0	0	0	534580
165	B0S525;A5PLA3	>tr|B0S525|B0S525_DANRE Insulin-like growth factor binding protein 5 OS=Danio rerio GN=igfbp5b PE=4 SV=1		9	9	0	1	0	4	4	5	6	5	5	6	6	6	6	7	5	7	6	6	3	5	7	5	5				0	0	0	768850	856260	817740	3914200	1525600	3624200	5438100	5752700	4504000	11310000	9261100	8078300	5358700	3570000	17853000
190	B0S6X9	>tr|B0S6X9|B0S6X9_DANRE Novel protein similar to vertebrate integrin, beta-like 1 (With EGF-like repeat domains) (ITGBL1, zgc:112304) OS=Danio rerio GN=DKEY-250I3.1 PE=4 SV=1		9	7	0	0	1	5	7	8	8	5	8	8	8	8	7	5	5	4	4	8	5	6	3	4	4				0	0	0	2176900	1890900	2145300	4466700	1552700	2894500	12921000	14095000	9724600	11472000	15101000	5691100	7947200	12948000	9854500
279	B8JHU4;F1QVZ2;F1QER4;A5PLJ3;E9QCQ2	>tr|B8JHU4|B8JHU4_DANRE Actn1 isoform b OS=Danio rerio GN=actn1 PE=2 SV=1;>tr|F1QVZ2|F1QVZ2_DANRE Uncharacterized protein OS=Danio rerio GN=actn1 PE=4 SV=1		9	4	4	4	3	6	7	7	5	7	8	7	8	6	4	4	3	6	4	5	7	6	6	4	4				0	0	0	29220	30926	24361	0	24591	44189	38722	122680	0	0	56186	0	24680	0	15838
284	B8JIS1	>tr|B8JIS1|B8JIS1_DANRE ATP synthase, H+ transporting, mitochondrial F0 complex, subunit b, isoform 1 OS=Danio rerio GN=atp5f1 PE=4 SV=1		9	9	7	6	7	6	8	9	5	6	4	2	4	4	4	3	4	5	2	1	0	2	6	5	5				4158100	3511900	3518500	3246500	3365500	2313500	1623700	2682900	1925300	0	734550	1069700	424230	418480	1149700	369770	913750	0
287	B8JKE9;E9QIM2	>tr|B8JKE9|B8JKE9_DANRE Superoxide dismutase [Cu-Zn] OS=Danio rerio GN=sod3 PE=3 SV=1;>tr|E9QIM2|E9QIM2_DANRE Superoxide dismutase [Cu-Zn] OS=Danio rerio GN=CR847546.1 PE=3 SV=1		9	9	1	2	2	2	2	2	5	4	4	4	4	5	8	7	7	6	7	6	3	4	7	7	6				0	1057900	749510	631610	979640	290100	5347700	3257300	6423800	2257300	2095700	2004300	10737000	8603100	18708000	26414000	29227000	35575000
397	E7F1S4	>tr|E7F1S4|E7F1S4_DANRE Uncharacterized protein OS=Danio rerio GN=thbs2b PE=4 SV=1		9	9	1	3	2	4	3	3	6	4	3	8	7	7	7	7	4	6	5	6	5	5	5	5	6				0	347780	338680	168090	202010	184680	751080	718850	532940	2004400	1946200	2585900	2802500	3015400	442680	969510	1397600	953260
561	E7FH19	>tr|E7FH19|E7FH19_DANRE Uncharacterized protein OS=Danio rerio GN=CABZ01100189.1 PE=4 SV=1		9	9	7	7	6	6	6	7	6	9	7	8	7	7	9	9	6	5	5	5	4	5	2	4	7				2107500	3144200	2103000	2381500	4065800	4240700	7303000	8687000	8634100	12927000	7326300	11324000	16049000	16297000	4569800	7576000	4307500	3261600
627	F1Q4W2;F1RCM2;F1R0X8	>tr|F1Q4W2|F1Q4W2_DANRE Uncharacterized protein OS=Danio rerio GN=prom1b PE=4 SV=1;>tr|F1RCM2|F1RCM2_DANRE Uncharacterized protein OS=Danio rerio GN=prom1b PE=4 SV=1;>tr|F1R0X8|F1R0X8_DANRE Uncharacterized protein OS=Danio rerio GN=prom1b PE=4 SV=1		9	4	8	6	9	1	0	0	0	1	0	0	0	0	0	0	1	0	0	0	0	0	0	0	0				10386000	4297300	4661100	0	0	0	0	0	0	0	0	0	0	0	0	0	0	0
701	F1QA32;A4UQV6;F1R3G0;F1QN77	>tr|F1QA32|F1QA32_DANRE Uncharacterized protein OS=Danio rerio GN=slc8a4b PE=4 SV=1		9	9	3	1	3	1	0	1	4	4	3	4	4	5	8	9	1	2	0	1	6	3	4	1	4				1108900	0	303120	0	0	0	678270	1147400	577760	489830	913280	1019500	5057100	6682900	0	308920	0	0
818	F1QHI8	>tr|F1QHI8|F1QHI8_DANRE Uncharacterized protein OS=Danio rerio GN=pdgfrl PE=4 SV=1		9	9	0	1	1	7	8	5	7	7	6	8	8	7	8	6	8	8	8	8	4	7	4	7	5				0	0	0	2066600	2521800	2033600	6633000	2525200	3540900	11879000	8029700	4551700	7930300	5142700	5519900	7732400	5399600	7158800
884	F1QN93	>tr|F1QN93|F1QN93_DANRE Uncharacterized protein (Fragment) OS=Danio rerio GN=nrp2a PE=4 SV=1		9	9	6	4	6	2	4	2	8	8	8	6	6	8	9	9	5	5	4	5	8	7	8	3	6				1470100	1673300	1625600	217810	264000	111100	670060	1482100	481260	427360	453090	865910	8086800	10090000	651840	704520	796630	681320
932	F1QSQ0	>tr|F1QSQ0|F1QSQ0_DANRE Uncharacterized protein OS=Danio rerio GN=dsc2l PE=3 SV=1		9	9	1	1	0	7	7	3	6	2	1	8	8	8	8	8	6	1	0	6	9	8	6	7	8				0	0	0	388160	296790	227520	277000	377820	0	1155400	1901600	1997100	963430	795710	489270	0	0	703650
936	F1QT29	>tr|F1QT29|F1QT29_DANRE Uncharacterized protein OS=Danio rerio GN=si:dkeyp-24h9.1 PE=4 SV=1		9	1	8	6	6	7	8	8	6	6	6	5	5	6	5	5	4	4	1	3	4	3	6	4	4				0	0	0	0	0	0	0	0	0	0	0	0	0	0	0	0	0	0
749	F1QWY8;F1QD88;Q90460;F1Q742;Q7ZZ85	>tr|F1QWY8|F1QWY8_DANRE Uncharacterized protein (Fragment) OS=Danio rerio GN=alcama PE=4 SV=1;>tr|F1QD88|F1QD88_DANRE Uncharacterized protein (Fragment) OS=Danio rerio GN=alcama PE=4 SV=1;>sp|Q90460|C166A_DANRE CD166 antigen homolog A OS=Danio rerio GN=alc		9	9	9	9	9	8	8	8	5	8	6	1	0	3	2	3	1	1	1	0	0	0	2	0	1				5005500	6986300	3395800	1541400	1975700	897910	529170	682980	594660	0	0	425050	436840	633250	0	0	0	0
996	F1QZ45	>tr|F1QZ45|F1QZ45_DANRE Uncharacterized protein (Fragment) OS=Danio rerio GN=CR936975.2 PE=4 SV=1		9	9	9	8	8	7	7	5	2	6	5	3	3	5	4	3	3	4	2	0	3	2	3	1	1				3521200	4522700	4094700	539690	427660	618900	1984700	3085400	2761400	333160	980480	1574500	327700	1473000	442280	660590	552480	0
1007	F1R089	>tr|F1R089|F1R089_DANRE Uncharacterized protein OS=Danio rerio GN=egfl6 PE=4 SV=1		9	9	2	4	2	7	7	7	5	3	4	6	7	5	9	8	2	4	2	3	1	2	4	3	4				599410	441860	685810	1251100	1530000	3920800	851730	608960	650130	2945700	2158500	1879200	3686100	2993000	1704200	2002700	2455400	2538000
1013	F1R1F1	>tr|F1R1F1|F1R1F1_DANRE Uncharacterized protein OS=Danio rerio GN=col9a3 PE=4 SV=1		9	9	8	8	8	9	9	9	9	9	7	7	8	7	7	8	8	4	5	5	7	6	2	4	6				74794000	102320000	74958000	171050000	112620000	96010000	363470000	237590000	304270000	118250000	117860000	91756000	67832000	86153000	62149000	98373000	94726000	25622000
1031	F1R2W1	>tr|F1R2W1|F1R2W1_DANRE Uncharacterized protein OS=Danio rerio GN=dhrs13 PE=3 SV=1		9	9	8	9	9	7	8	7	5	5	4	3	4	5	4	4	4	5	3	2	4	3	5	4	2				7008500	5431200	7506800	2821000	2645700	1997100	685260	1345500	1430900	147670	896900	421780	889370	455170	475790	956500	279760	438790
1065	F1R5Z2	>tr|F1R5Z2|F1R5Z2_DANRE Uncharacterized protein OS=Danio rerio GN=si:ch211-198b3.2 PE=4 SV=1		9	9	0	0	0	2	0	3	6	6	5	7	7	6	8	8	4	6	7	6	5	5	6	5	6				0	0	0	194030	0	172000	713380	665150	546150	1006700	1698100	1016200	2227900	2981700	353360	489590	2082500	379410
1066	F1R612	>tr|F1R612|F1R612_DANRE Uncharacterized protein OS=Danio rerio GN=F7 (2 of 3) PE=3 SV=1		9	9	4	3	3	6	5	7	6	5	4	4	5	4	6	8	7	9	8	8	7	8	7	6	8				2390600	2065600	1562600	2129000	1079800	1645600	1143400	763590	768190	1202900	911990	1126300	2363200	2672800	21055000	12201000	12200000	13037000
1082	F1R761	>tr|F1R761|F1R761_DANRE Uncharacterized protein (Fragment) OS=Danio rerio GN=cryba4 PE=4 SV=1		9	9	9	9	8	2	1	1	3	6	3	1	0	0	1	0	0	0	0	0	0	0	0	0	0				444720000	300220000	170770000	597510	0	0	2690500	10162000	1572600	0	0	0	0	0	0	0	0	0
1083	F1R774	>tr|F1R774|F1R774_DANRE Uncharacterized protein OS=Danio rerio GN=pcolce2b PE=4 SV=1		9	9	5	4	5	6	6	5	9	9	8	7	8	9	6	4	6	5	4	7	5	7	3	3	6				1332400	1349000	1305900	3542200	2617400	3174700	16458000	8919000	10534000	10890000	7593600	7441100	2414600	3336200	2129600	3084700	1312100	6811200
1093	F1R886;F1QFC2	>tr|F1R886|F1R886_DANRE Uncharacterized protein OS=Danio rerio GN=cfb PE=3 SV=1;>tr|F1QFC2|F1QFC2_DANRE Uncharacterized protein OS=Danio rerio GN=cfb PE=3 SV=1		9	7	2	2	3	7	7	7	5	5	4	8	6	7	6	6	2	5	4	5	5	6	5	4	5				474890	497450	382020	1415100	1230800	1774800	1024400	691950	467930	1376700	1647800	2587200	1173900	1879900	578080	630500	825420	1805100
491	F1R9N6;E7FAK0;E7FE06	>tr|F1R9N6|F1R9N6_DANRE Uncharacterized protein OS=Danio rerio GN=zgc:110216 PE=3 SV=1;>tr|E7FAK0|E7FAK0_DANRE Uncharacterized protein OS=Danio rerio GN=CR354435.1 PE=3 SV=1;>tr|E7FE06|E7FE06_DANRE Uncharacterized protein OS=Danio rerio GN=CR354435.4 PE=3		9	1	6	6	5	7	8	7	6	7	7	9	7	6	5	7	3	4	3	6	1	4	2	3	4				4195500	4303200	4795100	3879100	6570400	4604300	27235000	14758000	33252000	22548000	10410000	16624000	6293100	8822300	3682800	6708300	4484700	5885800
1217	Q1LXE1;Q1LXE2	>tr|Q1LXE1|Q1LXE1_DANRE Novel protein similar to vertebrate hyaluronan and proteoglycan link protein 1 (HAPLN1) OS=Danio rerio GN=hapln1a PE=4 SV=1		9	7	3	3	4	2	2	3	4	4	3	1	1	1	1	1	1	2	1	2	2	2	6	7	4				0	0	0	0	0	0	120550	0	0	0	0	0	0	0	0	0	0	0
1228	Q1RLR3	>tr|Q1RLR3|Q1RLR3_DANRE Uncharacterized protein OS=Danio rerio GN=zgc:136902 PE=2 SV=1		9	3	5	6	5	4	4	4	8	7	7	7	6	6	5	6	5	3	1	4	4	6	4	3	5				0	0	0	0	0	0	277540	289430	489780	0	0	0	0	0	0	0	0	0
1269	Q52JI6	>tr|Q52JI6|Q52JI6_DANRE Beta A1-2-crystallin OS=Danio rerio GN=cryba1l PE=2 SV=1		9	8	9	9	8	3	2	3	5	8	6	0	0	1	1	1	0	1	0	0	0	0	0	0	0				973290000	641880000	236690000	128480	174020	18684	905920	2078100	361020	0	0	0	0	0	0	0	0	0
1272	Q567N5	>tr|Q567N5|Q567N5_DANRE Ribosomal protein L6 OS=Danio rerio GN=rpl6 PE=2 SV=1		9	9	8	9	7	9	9	9	5	8	8	7	6	7	5	4	1	2	2	3	4	3	3	3	3				13169000	9659700	16098000	17271000	22231000	20123000	7801400	7765400	10799000	6727500	7563700	7487600	3187600	4767300	0	547150	326660	451920
1285	Q5F0G5	>tr|Q5F0G5|Q5F0G5_DANRE Myocilin OS=Danio rerio GN=myoc PE=2 SV=1		9	9	2	2	1	1	3	2	2	2	2	5	4	4	5	3	6	5	3	8	9	8	6	6	9				408970	546140	0	0	196940	535560	548380	265310	344760	1042100	751930	722730	814340	1042600	5284700	2029500	818420	8013700
1292	Q5RG12	>tr|Q5RG12|Q5RG12_DANRE Heat shock protein 90-alpha 2 OS=Danio rerio GN=hsp90a.2 PE=2 SV=1		9	0	7	6	7	6	6	5	4	6	4	4	5	6	3	7	5	4	3	6	4	5	5	4	3				677290	0	1157400	0	170210	0	0	178150	0	0	0	0	0	0	0	0	0	0
1350	Q6DG10;E7F2I8;F1RA45;E7F1W8;E7FCZ5;E9QCX3	>tr|Q6DG10|Q6DG10_DANRE Matrix metalloproteinase 2 OS=Danio rerio GN=mmp2 PE=2 SV=1		9	9	3	5	3	8	7	7	6	8	6	6	5	7	5	6	7	8	8	8	9	8	6	6	7				1074100	895580	921820	2710500	2900000	2882900	2891800	2806000	2772300	2964500	2098300	2684800	3634500	4232300	4230400	4339800	5904800	6614200
1500	Q6Q420	>tr|Q6Q420|Q6Q420_DANRE Ribosomal protein S15a OS=Danio rerio GN=rps15a PE=2 SV=1		9	9	9	7	6	7	7	8	6	5	4	5	5	6	4	2	4	2	0	1	2	3	5	4	3				17408000	19560000	14973000	11421000	14891000	10344000	3219200	9417000	8757400	2833900	2283900	4438500	1832400	1988400	640640	539950	0	0
1506	Q6TH07;F1R0J7	>tr|Q6TH07|Q6TH07_DANRE Flotillin 1 OS=Danio rerio GN=flot1b PE=2 SV=1;>tr|F1R0J7|F1R0J7_DANRE Uncharacterized protein OS=Danio rerio GN=flot1b PE=4 SV=1		9	8	8	9	8	7	8	8	6	6	6	4	5	6	5	5	2	3	1	1	2	2	2	1	0				9335200	4009800	7754800	16285000	14080000	14983000	851680	1406200	1001800	367690	1004700	664840	859300	1182400	995840	353330	0	0
1555	Q7T3L3	>tr|Q7T3L3|Q7T3L3_DANRE Chaperone protein GP96 OS=Danio rerio GN=hsp90b1 PE=2 SV=1		9	9	8	7	8	7	7	7	5	6	6	7	7	8	9	7	4	7	5	7	8	7	6	7	7				1733900	1851300	2095200	2461700	1939700	3032500	1119400	1622100	1246100	1626600	1902600	1521100	1915700	1707400	1994600	2404700	1925600	3859400
328	CON__P19013	>P19013 SWISS-PROT:P19013|K2C4_HUMAN Keratin, type II cytoskeletal 4 OS=Homo sapiens GN=KRT4 PE=1 SV=4		8	4	3	6	3	4	3	3	4	4	7	7	4	7	4	3	2	3	3	5	5	7	3	1	4			+	0	238010	0	0	0	0	0	0	958030	667390	0	1553900	0	0	0	0	0	306500
619	Q5PRD0;E9QJ96;Q7T356;F1RBF6;A1E267;E7F354;Q6PC29;Q7T3G2;B8JLJ3	>sp|Q5PRD0|143BA_DANRE 14-3-3 protein beta/alpha-A OS=Danio rerio GN=ywhaba PE=2 SV=2;>tr|E9QJ96|E9QJ96_DANRE Uncharacterized protein OS=Danio rerio GN=ywhaba PE=4 SV=1;>sp|Q7T356|143BB_DANRE 14-3-3 protein beta/alpha-B OS=Danio rerio GN=ywhabb PE=2 SV=1;>		8	5	7	6	7	4	6	2	7	7	6	7	4	6	6	5	3	3	2	3	5	5	4	2	4				4883500	6548600	13129000	2615600	2146500	3272800	5247300	4951600	5481400	6370300	8712300	9539000	5790500	6581900	6326900	2302400	2786600	9048100
1329	Q66HV4	>sp|Q66HV4|COPB_DANRE Coatomer subunit beta OS=Danio rerio GN=copb1 PE=2 SV=1		8	8	3	5	6	4	5	4	7	8	8	2	5	7	7	5	1	1	0	0	1	0	1	0	0				500770	719610	570670	191350	235540	187280	303090	912370	1497400	0	233060	187490	188310	244690	0	0	0	0
1598	Q803F6	>sp|Q803F6|RSSA_DANRE 40S ribosomal protein SA OS=Danio rerio GN=rpsa PE=2 SV=1		8	8	5	5	4	4	7	5	7	6	7	6	4	7	6	5	2	3	0	1	4	0	2	2	2				651390	545120	649340	502520	379320	444600	1309900	2433600	1928000	1291000	807470	1648200	817800	648710	0	263010	0	0
1628	Q90474	>sp|Q90474|H90A1_DANRE Heat shock protein HSP 90-alpha 1 OS=Danio rerio GN=hsp90a.1 PE=2 SV=3		8	1	5	5	5	5	6	5	4	6	5	4	5	6	4	6	5	3	3	5	4	4	4	3	3				0	0	0	0	0	0	0	0	0	0	0	0	0	0	0	0	0	0
62	A3KQQ9	>tr|A3KQQ9|A3KQQ9_DANRE Secretogranin III OS=Danio rerio GN=scg3 PE=4 SV=1		8	8	2	0	1	6	5	5	6	5	1	7	7	7	7	8	1	2	7	6	2	6	5	1	3				0	0	0	864000	965750	1523500	1707300	538290	0	1904300	3013700	2110100	3214900	3433500	0	771280	1673200	1283700
469	E7F8J2;E7FAU1;E9QG44;E9QFU6	>tr|E7F8J2|E7F8J2_DANRE Uncharacterized protein OS=Danio rerio GN=CU302436.3 PE=3 SV=1;>tr|E7FAU1|E7FAU1_DANRE Uncharacterized protein OS=Danio rerio GN=CU302436.5 PE=3 SV=1;>tr|E9QG44|E9QG44_DANRE Uncharacterized protein OS=Danio rerio GN=CU302436.7 PE=3		8	1	6	6	5	7	8	7	6	7	7	8	7	6	5	7	3	4	3	6	2	4	2	3	4				0	0	0	0	0	0	0	0	0	0	0	0	0	0	2188700	0	0	0
494	E7FAV6	>tr|E7FAV6|E7FAV6_DANRE Uncharacterized protein OS=Danio rerio GN=CABZ01076275.1 PE=4 SV=1		8	8	8	7	8	7	8	7	5	6	6	2	4	4	5	3	6	6	6	5	7	3	6	8	7				4669900	1973600	2398000	2505700	3102400	1642600	517530	2293400	1812400	218900	237990	233570	425040	451020	1283000	1955700	846410	602260
497	E7FB02	>tr|E7FB02|E7FB02_DANRE Uncharacterized protein OS=Danio rerio GN=CABZ01076094.1 PE=4 SV=1		8	8	1	2	2	6	6	7	1	0	0	2	2	1	7	7	1	1	0	0	0	0	3	0	3				0	715520	455980	1528700	2130700	1964500	0	0	0	285180	353680	0	8428300	10740000	0	0	0	0
536	E7FE90	>tr|E7FE90|E7FE90_DANRE Uncharacterized protein OS=Danio rerio GN=fetub PE=4 SV=1		8	8	6	7	7	7	8	8	7	8	7	7	7	7	7	7	7	6	5	7	6	5	2	5	6				9222100	6080800	6750300	7596700	10984000	11428000	8533000	4454900	5848200	26597000	17055000	9988100	10481000	9821700	5555300	7026000	6356200	24034000
554	E7FG54	>tr|E7FG54|E7FG54_DANRE Uncharacterized protein OS=Danio rerio GN=CABZ01076669.1 PE=4 SV=1		8	5	0	0	0	2	1	2	2	2	2	0	0	0	0	0	2	6	3	0	0	0	5	4	4				0	0	0	0	0	0	1251000	0	0	0	0	0	0	0	0	1321600	0	0
677	F1Q861	>tr|F1Q861|F1Q861_DANRE Uncharacterized protein OS=Danio rerio GN=zgc:153921 PE=4 SV=1		8	1	2	1	3	4	2	6	4	2	5	4	5	5	5	6	5	6	5	5	8	6	6	3	6				0	0	0	0	0	0	0	0	0	0	0	0	0	0	0	0	0	0
678	F1Q881	>tr|F1Q881|F1Q881_DANRE Uncharacterized protein OS=Danio rerio GN=socs7 PE=4 SV=1		8	8	4	2	3	5	6	6	7	7	8	6	6	6	6	5	6	5	4	6	7	6	2	3	4				868360	1049400	835140	1256400	1303000	1016700	1733700	2067400	1339500	582040	1530000	1036800	579080	585340	865790	1118800	980000	790170
759	F1QE33;F1QRR2;F1QMT0	>tr|F1QE33|F1QE33_DANRE Uncharacterized protein OS=Danio rerio GN=dct PE=4 SV=1;>tr|F1QRR2|F1QRR2_DANRE Uncharacterized protein OS=Danio rerio GN=dct PE=4 SV=1;>tr|F1QMT0|F1QMT0_DANRE Uncharacterized protein (Fragment) OS=Danio rerio GN=dct PE=4 SV=1		8	8	8	7	7	3	4	4	0	0	1	0	0	0	1	0	0	0	0	0	1	0	0	0	0				10454000	6741200	5247700	509360	307630	365750	0	0	0	0	0	0	0	0	0	0	0	0
697	F1QFH8;F1QX33;F1RDQ3;F1Q9N0	>tr|F1QFH8|F1QFH8_DANRE Uncharacterized protein (Fragment) OS=Danio rerio GN=si:ch211-235o23.2 PE=4 SV=1;>tr|F1QX33|F1QX33_DANRE Uncharacterized protein (Fragment) OS=Danio rerio GN=si:ch211-235o23.2 PE=4 SV=1;>tr|F1RDQ3|F1RDQ3_DANRE Uncharacterized protei		8	8	7	7	6	6	6	8	6	5	5	7	6	5	6	6	4	7	6	5	5	6	5	5	5				12543000	7698900	9567300	11728000	17710000	7017500	6066100	4617800	4267600	6213700	5618000	3799800	9629400	11073000	1424200	2347500	2030000	2299400
790	F1QFX6	>tr|F1QFX6|F1QFX6_DANRE Uncharacterized protein OS=Danio rerio GN=ltbp3 PE=4 SV=1		8	8	2	3	2	4	4	1	7	6	3	7	8	8	8	8	3	3	3	4	7	4	5	4	5				0	802690	0	442840	617030	0	775100	630230	629940	1172700	997150	1097400	5365300	5247900	1754500	452140	777340	1575000
803	F1QGS4;Q7T1D8	>tr|F1QGS4|F1QGS4_DANRE Uncharacterized protein OS=Danio rerio GN=phb PE=4 SV=1;>tr|Q7T1D8|Q7T1D8_DANRE Phb protein OS=Danio rerio GN=phb PE=2 SV=1		8	8	7	7	7	7	7	7	6	7	7	5	6	6	3	4	4	4	3	2	4	4	4	5	5				15509000	6315400	13449000	8538100	7888400	4699400	5014200	11168000	9611900	2894400	2581600	1659600	8349400	6038800	3145800	3853400	1254100	0
831	F1QIL6;F1R6J9	>tr|F1QIL6|F1QIL6_DANRE Uncharacterized protein OS=Danio rerio GN=ACAD9 PE=3 SV=1;>tr|F1R6J9|F1R6J9_DANRE Uncharacterized protein OS=Danio rerio GN=ACAD9 PE=3 SV=1		8	6	7	6	5	6	7	6	3	4	5	1	2	2	1	3	2	3	0	0	1	0	1	2	0				1588800	902370	614020	1068400	817630	598670	383580	775730	703260	0	0	0	0	0	0	323650	0	0
837	F1QJ75	>tr|F1QJ75|F1QJ75_DANRE Uncharacterized protein OS=Danio rerio GN=dia1 PE=4 SV=1		8	5	5	5	6	7	8	7	7	7	6	5	4	6	3	4	5	7	2	4	8	4	5	6	6				617610	723320	443900	1034800	875380	794980	401310	933880	1310400	278250	311030	349930	0	308090	1046400	522300	0	348680
891	F1QNL8	>tr|F1QNL8|F1QNL8_DANRE Uncharacterized protein OS=Danio rerio GN=zgc:153921 PE=4 SV=1		8	2	2	1	3	3	1	5	3	1	4	3	4	4	4	5	5	8	7	6	8	6	7	4	6				427790	0	260620	389180	0	142850	272210	0	104510	657960	188670	379450	1123900	942760	2380900	1423500	1835900	3416200
941	F1QTG2;D2DUP9	>tr|F1QTG2|F1QTG2_DANRE Uncharacterized protein (Fragment) OS=Danio rerio GN=vwa2 PE=4 SV=1		8	8	3	3	4	4	5	6	1	0	0	1	0	0	8	8	0	0	0	0	0	0	1	0	2				722630	599290	405040	652090	1246400	605530	0	0	0	0	0	0	2608900	2793800	0	0	0	0
990	F1QYN1	>tr|F1QYN1|F1QYN1_DANRE Uncharacterized protein OS=Danio rerio GN=col4a6 PE=4 SV=1		8	6	8	7	7	8	7	8	6	6	7	4	2	3	1	0	3	2	2	1	0	2	2	0	1				38780000	37956000	18558000	69552000	75000000	17119000	2506800	2753500	2291600	830780	1278000	755400	0	0	3599000	1322600	827970	0
1015	F1R1P9;Q8JGW0	>tr|F1R1P9|F1R1P9_DANRE Uncharacterized protein OS=Danio rerio GN=thbs4b PE=4 SV=1;>sp|Q8JGW0|TSP4B_DANRE Thrombospondin-4-B OS=Danio rerio GN=thbs4b PE=2 SV=1		8	7	0	0	0	3	2	3	1	1	0	4	5	6	4	3	5	6	1	6	8	7	5	4	5				0	0	0	159680	138700	244670	0	0	0	502710	535750	996130	701460	322610	909170	3612200	0	3152300
1020	F1R291;F1QZI8	>tr|F1R291|F1R291_DANRE Uncharacterized protein OS=Danio rerio GN=col4a2 PE=4 SV=1;>tr|F1QZI8|F1QZI8_DANRE Uncharacterized protein (Fragment) OS=Danio rerio GN=col4a2 PE=4 SV=1		8	6	4	4	5	7	8	8	6	5	4	2	3	3	1	1	6	3	2	3	3	3	1	2	4				1808800	935590	756010	5169600	8959900	6979400	885060	638850	996280	0	688260	1135100	0	0	3762200	1470600	1712100	949820
1033	F1R2Z9;A2BFS0;Q1LUZ8	>tr|F1R2Z9|F1R2Z9_DANRE Uncharacterized protein OS=Danio rerio GN=spon1b PE=4 SV=1;>tr|A2BFS0|A2BFS0_DANRE Spondin 1b OS=Danio rerio GN=spon1b PE=4 SV=1		8	8	1	2	1	6	8	7	3	3	3	3	3	5	3	3	2	2	1	3	2	1	2	2	1				0	0	0	1986400	1463600	5213100	1452900	1028300	1063300	2950400	1662400	1076300	1660100	3507300	974460	1154700	0	0
1104	F1R8W3;F1R8W4;F1QK59	>tr|F1R8W3|F1R8W3_DANRE Uncharacterized protein OS=Danio rerio GN=desma PE=3 SV=1;>tr|F1R8W4|F1R8W4_DANRE Uncharacterized protein OS=Danio rerio GN=desma PE=3 SV=1		8	6	1	1	1	2	1	2	7	7	5	4	6	6	2	2	4	2	4	1	1	1	6	4	5				0	0	0	0	0	0	1192300	432230	228220	276360	343090	579030	0	0	279330	0	489810	0
1125	F1RAP6	>tr|F1RAP6|F1RAP6_DANRE Uncharacterized protein OS=Danio rerio GN=SERPINF2 (1 of 2) PE=3 SV=1		8	8	6	4	4	6	6	7	6	8	6	7	6	6	7	7	3	5	7	7	7	6	5	4	5				1729500	1864800	3000300	3257100	2013600	3934900	5047900	3446300	3568800	7141600	5698200	5123200	6221800	8501400	1187000	2813900	9846300	3595700
1155	F1REH8;F1QRP0;A8E7L0;A8E7L1;A8E7K8;A8E7L3;A8E7L2	>tr|F1REH8|F1REH8_DANRE Uncharacterized protein OS=Danio rerio GN=anxa13 PE=3 SV=1;>tr|F1QRP0|F1QRP0_DANRE Uncharacterized protein OS=Danio rerio GN=anxa13 PE=3 SV=1		8	8	8	5	8	7	7	6	6	6	7	4	5	7	2	5	2	2	2	2	6	2	3	2	1				3450800	3716000	5731700	4885400	2379100	3035000	1234600	2480900	1561100	152450	445650	808200	723810	367480	687510	676050	116050	213330
1188	Q1JQ69;Q90487;E7F4I1;Q6ZM17	>tr|Q1JQ69|Q1JQ69_DANRE Hbaa1 protein OS=Danio rerio GN=hbaa1 PE=2 SV=1;>sp|Q90487|HBA_DANRE Hemoglobin subunit alpha OS=Danio rerio GN=hbaa1 PE=2 SV=3;>tr|E7F4I1|E7F4I1_DANRE Uncharacterized protein OS=Danio rerio GN=OTTDARG00000027303 PE=3 SV=1;>tr|Q6ZM1		8	7	0	1	1	1	1	1	7	7	7	7	6	6	5	7	5	6	6	6	6	6	4	5	4				0	0	0	0	0	0	71092000	203960000	145420000	5556200	7365400	10638000	5998600	3918900	65416000	89550000	39438000	32534000
1223	Q1LYJ7;E9QEH2;E9QFM6	>tr|Q1LYJ7|Q1LYJ7_DANRE Novel protein OS=Danio rerio GN=kng1 PE=2 SV=1;>tr|E9QEH2|E9QEH2_DANRE Uncharacterized protein OS=Danio rerio GN=kng1 PE=4 SV=1		8	8	2	2	5	6	7	8	8	8	7	7	8	8	8	8	7	8	8	6	8	6	6	7	7				885480	1795400	557580	3420600	2653700	3135100	55817000	16095000	13720000	79790000	50454000	44942000	44314000	59066000	28984000	17361000	42853000	48637000
1304	Q5RIS7	>tr|Q5RIS7|Q5RIS7_DANRE Novel protein OS=Danio rerio GN=si:ch211-196f5.2 PE=4 SV=1		8	8	0	0	0	0	0	0	4	1	0	7	8	8	3	4	4	1	0	3	4	5	4	5	4				0	0	0	0	0	0	577600	0	0	36085000	17365000	15325000	1083200	640340	829300	0	0	1687800
385	Q5SPR2;E7F158;F1Q875	>tr|Q5SPR2|Q5SPR2_DANRE Clusterin OS=Danio rerio GN=clu PE=2 SV=1;>tr|E7F158|E7F158_DANRE Clusterin OS=Danio rerio GN=OTTDARG00000006252 PE=3 SV=1		8	8	1	1	0	2	2	2	3	2	0	4	4	6	4	5	4	4	4	5	7	8	5	4	5				0	0	0	155970	0	446630	294740	0	0	5012400	3372700	2330100	1952700	2020400	4023100	5243400	905600	53009000
1341	Q6AZB9	>tr|Q6AZB9|Q6AZB9_DANRE Novel protein similar to CD81 antigen (Cd81) OS=Danio rerio GN=zgc:92411 PE=2 SV=1		8	8	8	7	6	6	5	7	6	7	7	5	6	7	6	7	8	7	7	8	8	7	5	6	7				26125000	19251000	22174000	4363600	7759600	2854400	17596000	36825000	15764000	17648000	16786000	45865000	110030000	152540000	15581000	20391000	14812000	13754000
594	Q6DGL0;F1QN76;E9QF69	>tr|Q6DGL0|Q6DGL0_DANRE Ribosomal protein L18 OS=Danio rerio GN=zgc:92872 PE=2 SV=1;>tr|F1QN76|F1QN76_DANRE Ribosomal protein L18 (Fragment) OS=Danio rerio GN=zgc:92872 PE=3 SV=1;>tr|E9QF69|E9QF69_DANRE Ribosomal protein L18 OS=Danio rerio GN=zgc:92872 PE=		8	8	6	7	7	7	6	8	6	8	8	6	6	5	6	6	3	3	2	1	3	3	3	5	5				20876000	12103000	23312000	10064000	12085000	11855000	4673000	5510800	4971100	3822900	3873300	3272000	2350100	2752000	213930	208360	407800	0
1413	Q6NX86	>tr|Q6NX86|Q6NX86_DANRE High-mobility group box 1 OS=Danio rerio GN=hmgb1 PE=2 SV=1		8	8	5	5	5	7	7	8	6	5	6	5	6	6	7	7	5	4	3	4	2	5	2	3	6				5230500	3828100	3433400	5912300	10699000	8229500	10055000	3936000	5383900	11405000	4704800	5257600	4614500	4775000	4421800	4814900	4270000	7219400
1420	Q6NYE6;Q0P487	>tr|Q6NYE6|Q6NYE6_DANRE Cytochrome b5 reductase 3 OS=Danio rerio GN=cyb5r3 PE=2 SV=1		8	5	7	6	5	5	7	6	5	6	5	2	4	3	4	6	4	5	0	1	5	3	5	5	5				4945100	6283200	5907500	5092900	3980100	2589500	846530	2728100	2407800	1255500	2231900	732100	864150	633730	2433600	850580	0	0
1473	Q6PC13	>tr|Q6PC13|Q6PC13_DANRE Prohibitin 2 OS=Danio rerio GN=phb2 PE=2 SV=1		8	5	8	8	8	7	8	8	7	7	7	7	6	7	5	7	6	6	2	2	3	2	6	6	3				3838600	4770600	3363900	8823100	6534700	7634100	2028500	3571200	4005800	878520	932760	2389900	385260	300410	678910	630070	484550	721840
1493	Q6PHI8	>tr|Q6PHI8|Q6PHI8_DANRE Tkt protein OS=Danio rerio GN=tkt PE=2 SV=1		8	8	8	8	7	2	3	2	3	3	3	1	1	2	0	0	2	1	2	1	2	1	0	0	0				3469200	11379000	4834600	424290	208500	375470	275850	313300	254390	0	0	208290	0	0	308980	0	231100	0
1513	Q6TNV0;F1QLR1	>tr|Q6TNV0|Q6TNV0_DANRE Cytochrome c oxidase subunit IV isoform 1 OS=Danio rerio GN=cox4i1 PE=2 SV=1		8	8	5	5	4	5	6	6	5	3	4	4	5	4	4	4	4	4	4	0	1	2	5	5	4				11809000	15676000	12665000	4460600	10562000	4878100	9635900	12696000	12544000	5824400	4634400	8779500	5624800	6150900	3174100	4937100	2821500	0
1547	Q7T306	>tr|Q7T306|Q7T306_DANRE Ckmb protein OS=Danio rerio GN=ckmb PE=2 SV=1		8	4	3	3	5	4	3	3	5	5	4	3	5	4	4	3	2	4	2	7	7	6	4	2	3				0	379700	547450	299040	566340	0	807750	541610	1088000	567980	1200300	878670	1001500	844890	453750	290950	0	1045900
1553	Q7T3D5	>tr|Q7T3D5|Q7T3D5_DANRE Novel protein (Zgc:63952) OS=Danio rerio GN=pdcd6 PE=2 SV=1		8	8	7	6	5	7	6	7	5	5	6	5	2	5	2	2	3	3	1	2	5	2	6	4	2				7174300	10536000	5322600	2798000	3598900	4001400	825570	647510	550370	469510	487660	340050	500210	295060	151950	220790	0	430670
1643	Q9DGL3	>tr|Q9DGL3|Q9DGL3_DANRE Na+/K+ ATPase beta subunit isoform 1 OS=Danio rerio GN=atp1b1a PE=2 SV=1		8	8	8	6	6	7	7	6	6	7	7	4	8	7	6	5	4	3	3	1	3	3	3	2	4				18578000	8647100	10777000	11413000	18384000	5179400	2517300	7479500	7207000	1633100	3349500	4019900	1358900	1679400	1394200	1212300	333760	0
322	CON__P02769	>P02769 SWISS-PROT:P02769|ALBU_BOVIN Serum albumin precursor (Allergen Bos d 6)		7	7	4	3	3	2	2	3	6	5	4	5	5	4	5	4	3	5	2	2	1	4	2	3	4			+	861380	601810	976880	969060	427190	850020	904020	2517900	1033300	1226700	754000	368190	601630	528190	1069900	700720	0	0
47	A2VD23;F1R8B2	>sp|A2VD23|STM_DANRE Protein starmaker OS=Danio rerio GN=stm PE=2 SV=1;>tr|F1R8B2|F1R8B2_DANRE Uncharacterized protein OS=Danio rerio GN=stm PE=4 SV=1		7	7	1	1	1	2	2	0	1	0	0	0	0	1	0	1	0	4	5	3	0	2	0	0	0				0	0	0	474930	490220	0	0	0	0	0	0	0	0	0	0	1066400	1160400	70809
1276	Q58EG2;B7ZD02;A3QK16	>sp|Q58EG2|ERLN1_DANRE Erlin-1 OS=Danio rerio GN=erlin1 PE=2 SV=1		7	7	6	6	7	6	7	7	7	6	7	5	5	6	3	5	4	6	3	1	2	1	5	5	5				2754200	1657100	2566500	3873700	3397600	3920800	909740	1452500	2407000	613610	520770	616590	551380	599020	986490	597370	362270	0
1651	Q9I9N6;A8E7Q7;E7F605	>sp|Q9I9N6|ASC_DANRE Apoptosis-associated speck-like protein containing a CARD OS=Danio rerio GN=pycard PE=2 SV=1;>tr|A8E7Q7|A8E7Q7_DANRE Asc1 OS=Danio rerio GN=pycard PE=4 SV=1;>tr|E7F605|E7F605_DANRE Uncharacterized protein OS=Danio rerio GN=pycard PE=4		7	7	0	1	1	3	1	5	4	2	3	3	4	5	5	4	4	3	5	4	4	4	4	3	4				0	0	0	80748	0	116390	533130	141050	425610	417360	377730	293070	386520	497410	627300	585120	1036200	1243500
1669	Q9YHV4	>sp|Q9YHV4|FSTA_DANRE Follistatin-A OS=Danio rerio GN=fsta PE=2 SV=2		7	7	1	2	1	7	7	7	7	5	5	6	7	6	7	7	5	5	5	5	2	5	4	3	4				0	247000	0	2692700	3060900	2644900	1435000	884850	1640200	7308800	6922400	4660900	11340000	11200000	1310800	1531200	2022700	1943900
28	A2BHA3;Q08BV6;Q8AY63;B8JJ24;B8JJ23	>tr|A2BHA3|A2BHA3_DANRE Creatine kinase, muscle OS=Danio rerio GN=ckm PE=3 SV=1		7	3	3	2	3	4	2	2	3	4	5	3	4	4	3	2	2	3	1	5	6	6	4	4	3				0	0	0	0	0	0	0	0	87531	110760	290070	144330	0	0	91254	0	0	154130
55	A3KPR3	>tr|A3KPR3|A3KPR3_DANRE Novel protein similar to vertebrate histone 1, H1d (HIST1H1D) OS=Danio rerio GN=zgc:110380 PE=3 SV=1		7	6	3	4	3	4	3	2	6	6	6	6	6	6	4	6	5	3	3	4	1	5	2	4	4				1562600	791490	789350	1396600	0	0	3989500	1756200	3773200	4051300	5071500	3505300	1760500	1756600	15523000	4982300	11758000	18051000
79	A5PMP6;A5PMP8;A8KB97;E7F035	>tr|A5PMP6|A5PMP6_DANRE Novel protein similar to vertebrate complement component 3 (C3) OS=Danio rerio GN=si:dkey-21e7.2 PE=4 SV=1;>tr|A5PMP8|A5PMP8_DANRE Novel protein similar to vertebrate complement component 3 (C3) OS=Danio rerio GN=si:ch211-140f21.1 P		7	7	1	0	1	7	7	6	3	2	2	3	3	5	4	3	1	1	0	1	3	1	2	2	3				0	0	0	442560	346480	586580	108190	0	0	93192	171140	166800	100220	125510	0	0	0	0
88	A5WWD4;F1R996	>tr|A5WWD4|A5WWD4_DANRE Novel collagen protein (Fragment) OS=Danio rerio GN=si:dkey-61l1.4 PE=4 SV=1;>tr|F1R996|F1R996_DANRE Uncharacterized protein (Fragment) OS=Danio rerio GN=si:dkey-61l1.4 PE=4 SV=1		7	7	0	0	0	0	1	1	2	2	2	3	0	1	1	1	1	2	2	4	5	4	3	1	1				0	0	0	0	0	0	0	0	0	139870	0	0	0	0	0	254040	278050	760500
123	A8E7E1;F6P921	>tr|A8E7E1|A8E7E1_DANRE Novel protein similar to vertebrate complement component (3d/Epstein Barr virus) receptor 2 (CR2) (Fragment) OS=Danio rerio GN=CH211-207O17.1-001 PE=4 SV=1;>tr|F6P921|F6P921_DANRE Uncharacterized protein (Fragment) OS=Danio rerio GN		7	1	1	1	0	4	4	5	6	5	6	6	6	6	5	5	2	2	3	4	1	4	1	3	2				0	0	0	0	0	0	0	0	0	0	0	0	0	0	0	0	0	0
129	A8HAJ8	>tr|A8HAJ8|A8HAJ8_DANRE Novel protein similar to vertebrate complement component 8, beta polypeptide (C8B) OS=Danio rerio GN=c8b PE=4 SV=1		7	7	1	1	1	6	7	6	6	6	4	6	6	6	6	6	4	3	3	3	1	3	3	3	2				0	0	0	2375000	2612400	2813400	1543800	1282200	1142200	2232500	2255300	1332100	1582900	1574700	1408900	1419000	1917400	0
137	A8WG85;Q6PC86	>tr|A8WG85|A8WG85_DANRE Ckmt2 protein OS=Danio rerio GN=ckmt2 PE=2 SV=1;>tr|Q6PC86|Q6PC86_DANRE Creatine kinase, mitochondrial 2 (Sarcomeric) OS=Danio rerio GN=ckmt2 PE=2 SV=1		7	2	6	7	7	2	3	2	4	2	6	1	2	1	2	1	4	6	5	1	3	3	4	2	1				0	974350	937550	0	0	0	0	1035800	1782200	0	0	0	0	0	0	0	0	0
195	B0UXF7;F1R6V4	>tr|B0UXF7|B0UXF7_DANRE Collagen, type IV, alpha 5 (Alport syndrome) OS=Danio rerio GN=col4a5 PE=4 SV=1;>tr|F1R6V4|F1R6V4_DANRE Uncharacterized protein (Fragment) OS=Danio rerio GN=col4a5 PE=4 SV=1		7	6	6	6	5	6	7	7	4	6	4	3	4	3	2	2	2	3	2	1	1	1	2	1	1				27811000	32846000	20266000	57216000	42237000	93822000	4335600	4836500	4669700	4153500	1572700	1589900	0	735460	8137500	4863200	1492000	0
213	B0V190	>tr|B0V190|B0V190_DANRE Novel crystallin, gamma M2 gene (Crygm, zgc:92724) OS=Danio rerio GN=crygm2d15 PE=4 SV=1		7	2	7	7	6	3	1	1	1	4	2	0	0	0	0	0	0	0	0	0	0	0	0	0	0				4134000	11660000	1480300	0	0	0	0	0	0	0	0	0	0	0	0	0	0	0
233	B3DKC5	>tr|B3DKC5|B3DKC5_DANRE Lamin A OS=Danio rerio GN=lmna PE=2 SV=1		7	7	0	0	0	0	0	1	2	1	0	5	5	5	4	5	2	2	1	2	2	3	5	2	3				0	0	0	0	0	0	477380	0	0	1230100	1151100	1440200	1607100	518160	603870	570690	0	874420
353	E7EXE7	>tr|E7EXE7|E7EXE7_DANRE Uncharacterized protein OS=Danio rerio GN=CABZ01044297.1 PE=4 SV=1		7	7	0	0	0	5	6	6	2	0	2	4	6	6	4	4	3	3	1	4	3	4	3	4	3				0	0	0	68930000	35731000	43265000	217200	0	0	7274200	5728800	10831000	594190	684380	149480	111550	0	758090
373	E7EZH8;E7F2T3	>tr|E7EZH8|E7EZH8_DANRE Uncharacterized protein OS=Danio rerio GN=CU457819.3 PE=3 SV=1;>tr|E7F2T3|E7F2T3_DANRE Uncharacterized protein OS=Danio rerio GN=FP325123.1 PE=3 SV=1		7	2	6	6	4	6	7	6	5	7	7	7	6	5	6	7	3	4	2	5	1	3	2	3	3				0	1359700	0	0	0	0	2184900	1664100	4838200	2357000	0	0	0	0	0	0	0	0
380	E7F0Y1	>tr|E7F0Y1|E7F0Y1_DANRE Uncharacterized protein OS=Danio rerio GN=CABZ01049058.1 PE=4 SV=1		7	6	0	0	0	0	0	0	4	2	0	3	4	4	0	0	5	6	5	5	5	7	4	4	6				0	0	0	0	0	0	343180	720710	0	1809300	712630	919570	0	0	2898500	9756100	4673500	41082000
427	E7F4R9	>tr|E7F4R9|E7F4R9_DANRE Isocitrate dehydrogenase [NADP] OS=Danio rerio GN=CABZ01039783.1 PE=3 SV=1		7	7	3	4	4	3	3	3	5	5	3	6	5	5	3	4	5	5	2	3	3	3	6	7	5				2115700	1678300	3499000	602090	548740	795880	640120	1877600	2514300	506110	861400	1170400	447150	438570	937790	1164800	919100	303250
433	E7F5A4	>tr|E7F5A4|E7F5A4_DANRE Uncharacterized protein OS=Danio rerio GN=CR762436.2 PE=3 SV=1		7	1	5	5	4	6	6	6	4	6	6	7	6	5	5	6	3	4	2	5	1	4	2	3	4				0	0	0	0	0	0	0	0	0	0	0	0	459900	0	0	0	0	0
456	E7F7F9	>tr|E7F7F9|E7F7F9_DANRE Uncharacterized protein OS=Danio rerio GN=CABZ01046248.1 PE=4 SV=1		7	7	2	1	2	4	4	4	2	1	0	0	3	3	7	7	0	0	2	0	0	0	4	1	3				174760	0	215660	337690	350580	246730	133130	0	0	0	139500	190020	5359200	3457100	0	0	54763	0
21	E7F7N9;A2BFN5;Q7ZUY3;F1R7H5;F1QTL1;E7EXD7;E7F2T2;Q5XJK2;F1Q909;Q7ZTT0	>tr|E7F7N9|E7F7N9_DANRE Histone H2A OS=Danio rerio GN=CU457819.2 PE=3 SV=1;>tr|A2BFN5|A2BFN5_DANRE Histone H2A OS=Danio rerio GN=h2afx PE=3 SV=1;>sp|Q7ZUY3|H2AX_DANRE Histone H2A.x OS=Danio rerio GN=h2afx PE=2 SV=3;>tr|F1R7H5|F1R7H5_DANRE Histone H2A (Frag		7	1	4	4	4	5	4	3	5	6	5	4	5	5	4	4	2	2	4	3	4	2	5	3	5				20326000	24284000	17398000	27258000	39060000	29690000	295380000	206070000	212580000	326770000	182030000	134180000	49570000	50601000	29057000	40975000	42759000	42965000
545	E7FF99	>tr|E7FF99|E7FF99_DANRE Uncharacterized protein OS=Danio rerio GN=CABZ01075689.1 PE=4 SV=1		7	7	5	4	4	5	5	5	5	5	5	4	4	4	4	5	4	5	2	3	4	4	4	5	3				28621000	20777000	19678000	47354000	45881000	21568000	15086000	22173000	17890000	7484200	10092000	10436000	25980000	15924000	8142100	3054500	1272200	2157700
559	E7FGH5	>tr|E7FGH5|E7FGH5_DANRE Uncharacterized protein OS=Danio rerio GN=CU929340.1 PE=4 SV=1		7	4	2	3	2	1	0	0	4	2	2	1	0	0	0	0	4	2	2	0	0	0	0	0	0				0	0	0	0	0	0	0	0	0	0	0	0	0	0	1674600	0	659870	0
642	F1Q5S9;F1R9Q0;Q5BJI9	>tr|F1Q5S9|F1Q5S9_DANRE Uncharacterized protein OS=Danio rerio GN=spcs2 PE=4 SV=1;>tr|F1R9Q0|F1R9Q0_DANRE Uncharacterized protein OS=Danio rerio GN=spcs2 PE=4 SV=1;>sp|Q5BJI9|SPCS2_DANRE Probable signal peptidase complex subunit 2 OS=Danio rerio GN=spcs2 P		7	7	7	7	5	6	6	3	3	5	3	1	3	4	1	3	1	1	0	1	0	1	1	1	0				14698000	7932100	16963000	1778900	2910500	0	1586300	1705900	1534000	0	0	869570	0	1216500	0	0	0	0
695	F1Q9D2;E7F5X2;E7F725;F1QU15;Q1LUM8;E9QJ75;F1QH32;F1QFF7	>tr|F1Q9D2|F1Q9D2_DANRE Uncharacterized protein OS=Danio rerio GN=cpne3 PE=4 SV=1		7	6	7	5	5	7	6	5	1	5	5	1	0	1	1	1	1	2	0	0	0	0	2	1	0				2189000	2442600	2543800	1316400	1838500	1461600	0	935300	530720	0	0	0	0	0	0	455100	0	0
707	F1QAK5;F1QIH5;A2ATX6;E7FC21	>tr|F1QAK5|F1QAK5_DANRE Uncharacterized protein OS=Danio rerio GN=nt5c2b PE=4 SV=1;>tr|F1QIH5|F1QIH5_DANRE Uncharacterized protein (Fragment) OS=Danio rerio GN=nt5c2a PE=4 SV=1;>tr|A2ATX6|A2ATX6_DANRE 5-nucleotidase, cytosolic II OS=Danio rerio GN=nt5c2a		7	7	6	7	4	3	2	4	0	0	0	0	0	0	0	0	0	1	0	0	0	1	0	0	1				1377700	3335100	1108500	420410	378350	295220	0	0	0	0	0	0	0	0	0	0	0	0
717	F1QBB3;Q8JHV6	>tr|F1QBB3|F1QBB3_DANRE Uncharacterized protein OS=Danio rerio GN=lamb4 PE=4 SV=1;>sp|Q8JHV6|LAMB4_DANRE Laminin subunit beta-4 OS=Danio rerio GN=lamb4 PE=2 SV=1		7	7	4	2	3	7	7	6	2	1	2	0	0	0	0	0	1	0	0	0	0	0	0	0	0				482440	752670	456300	906460	683010	1101100	212250	0	462280	0	0	0	0	0	0	0	0	0
722	F1QBN5;Q5SPJ1	>tr|F1QBN5|F1QBN5_DANRE Uncharacterized protein (Fragment) OS=Danio rerio GN=serpina1l PE=3 SV=1;>tr|Q5SPJ1|Q5SPJ1_DANRE Novel protein similar to serine (Or cysteine) proteinase inhibitor, clade A (Alpha-1 antiproteinase, antitrypsin), member 1 (Serpina1)		7	1	4	3	4	5	5	4	4	4	4	4	4	5	5	5	3	6	4	4	7	5	6	5	4				0	0	0	0	0	0	0	0	0	0	0	0	0	0	0	0	0	0
163	F1QBX3;B0R1C4	>tr|F1QBX3|F1QBX3_DANRE Uncharacterized protein (Fragment) OS=Danio rerio GN=si:dkey-81j5.3 PE=4 SV=1;>tr|B0R1C4|B0R1C4_DANRE Novel protein similar to vertebrate dipeptidyl-peptidase 4 (CD26, adenosine deaminase complexing protein 2) (DPP4) OS=Danio rerio		7	7	4	4	3	5	6	6	3	6	5	3	2	3	3	3	2	2	1	2	5	2	2	1	1				576300	456710	497170	1628100	1413000	853430	421910	1107500	827590	396660	492360	606880	354360	498840	761310	375560	0	229550
725	F1QC34;F1QFW5	>tr|F1QC34|F1QC34_DANRE Uncharacterized protein OS=Danio rerio GN=rpn2 PE=4 SV=1;>tr|F1QFW5|F1QFW5_DANRE Uncharacterized protein (Fragment) OS=Danio rerio GN=rpn2 PE=4 SV=1		7	7	5	3	5	5	5	4	6	7	7	6	6	7	7	6	1	2	2	2	1	4	4	4	2				1237300	752030	725970	799850	811710	809920	1534800	3075200	3478600	775560	1232800	1775600	1042300	1433200	0	401490	0	544690
740	F1QCJ7	>tr|F1QCJ7|F1QCJ7_DANRE Uncharacterized protein (Fragment) OS=Danio rerio GN=nomo PE=4 SV=1		7	7	3	3	4	6	6	4	3	5	4	1	4	3	2	2	1	1	1	2	0	1	2	0	0				1216500	569620	1184400	308700	271120	210090	0	329370	362390	0	205680	223250	313950	234860	0	0	0	0
787	F1QFS5	>tr|F1QFS5|F1QFS5_DANRE Uncharacterized protein OS=Danio rerio GN=CU655835.1 PE=4 SV=1		7	3	3	4	3	2	2	2	2	5	2	6	6	6	4	4	4	3	0	2	2	2	1	2	1				0	0	0	0	0	0	0	223280	0	185320	359950	370220	136040	198380	212840	0	0	0
800	F1QGG9	>tr|F1QGG9|F1QGG9_DANRE Uncharacterized protein OS=Danio rerio GN=gas6 PE=4 SV=1		7	7	0	1	0	5	5	4	3	2	2	4	4	4	3	5	5	5	3	5	5	3	4	5	4				0	0	0	337280	241640	396900	780500	474800	422720	1147200	1371600	1050500	1345400	1182900	873380	948820	768800	1943900
850	F1QJP3	>tr|F1QJP3|F1QJP3_DANRE Uncharacterized protein OS=Danio rerio GN=myl10 PE=4 SV=1		7	5	0	0	0	5	4	5	6	5	6	2	2	2	2	1	7	7	7	0	0	0	5	6	6				0	0	0	281240	216310	310750	417560	261970	192200	92220	215990	0	143470	0	1364800	1263300	1233800	0
907	F1QQE5	>tr|F1QQE5|F1QQE5_DANRE Uncharacterized protein OS=Danio rerio GN=sptb PE=4 SV=1		7	4	2	4	2	1	1	1	3	4	3	6	6	5	4	4	3	2	0	1	0	1	2	3	1				0	283870	0	0	0	0	179230	290480	490270	278750	486270	839080	189540	184640	0	0	0	0
562	F1QWU4;E9QB41;Q5XJ62;E9QIL0;E9QC87;F1QAL2	>tr|F1QWU4|F1QWU4_DANRE Uncharacterized protein OS=Danio rerio GN=myl6 PE=4 SV=1;>tr|E9QB41|E9QB41_DANRE Uncharacterized protein OS=Danio rerio GN=myl6 PE=4 SV=1;>tr|Q5XJ62|Q5XJ62_DANRE Uncharacterized protein OS=Danio rerio GN=myl6 PE=2 SV=1		7	3	2	2	3	7	7	7	3	3	3	4	3	4	2	2	2	3	3	2	2	2	4	3	3				545100	856070	498450	24054000	20483000	9451500	4373600	1232700	2360200	2218300	1693400	3359200	1820700	827030	1892900	1071500	584850	1011200
989	F1QYK9;B3DKC6	>tr|F1QYK9|F1QYK9_DANRE Uncharacterized protein OS=Danio rerio GN=myl9 PE=4 SV=1;>tr|B3DKC6|B3DKC6_DANRE Si:dkey-216e9.5 protein OS=Danio rerio GN=myl12.2 PE=2 SV=1		7	3	0	0	0	7	5	7	6	5	4	5	6	5	2	4	1	1	1	1	3	2	3	2	2				0	0	0	6788900	3404800	7934100	1350400	329200	614350	558340	469290	672760	0	135890	0	0	0	0
1006	F1R074;F1R3X5	>tr|F1R074|F1R074_DANRE Uncharacterized protein (Fragment) OS=Danio rerio GN=agrn PE=4 SV=1;>tr|F1R3X5|F1R3X5_DANRE Uncharacterized protein (Fragment) OS=Danio rerio GN=agrn PE=4 SV=1		7	7	0	0	0	6	5	4	5	3	3	3	1	3	3	3	1	0	3	2	2	2	3	2	1				0	0	0	257030	246560	613730	358410	352480	294730	373710	0	430550	395540	484740	0	0	310950	455480
1009	F1R0N0	>tr|F1R0N0|F1R0N0_DANRE Uncharacterized protein OS=Danio rerio GN=lrrc17 PE=4 SV=1		7	7	0	1	0	5	7	7	3	3	3	5	3	6	6	6	2	4	4	3	3	2	5	5	5				0	0	0	395360	829380	1174200	505800	534640	538220	1376700	808330	930300	6250900	5952300	760440	1567000	718570	574560
1012	F1R147	>tr|F1R147|F1R147_DANRE Uncharacterized protein OS=Danio rerio GN=pla2g12b PE=4 SV=1		7	7	1	2	1	2	2	4	4	2	1	3	5	2	5	4	2	4	5	3	3	3	5	3	4				0	0	0	401580	1408800	2496300	771180	1033700	0	1558600	1115500	3052300	15753000	18602000	0	526760	1246400	0
1035	F1R319	>tr|F1R319|F1R319_DANRE Uncharacterized protein OS=Danio rerio GN=slc25a11 PE=3 SV=1		7	7	6	6	6	6	6	6	4	6	6	3	5	7	4	4	6	6	5	2	4	4	6	6	4				5065400	5852200	4880900	4092300	3183900	2412000	782350	2014100	2018900	664850	761870	1078400	1145400	906190	2777900	3464100	1993300	329090
1059	F1R511	>tr|F1R511|F1R511_DANRE Uncharacterized protein (Fragment) OS=Danio rerio GN=BX294110.1 PE=4 SV=1		7	7	4	5	5	4	5	5	7	6	4	5	4	6	4	3	5	3	5	5	5	5	3	4	4				8016900	9371400	2665200	3401100	3317000	2919300	38862000	8817800	12700000	6524600	2495400	1920800	1089000	2298900	4994600	3722500	3105400	7924300
1110	F1R9C6	>tr|F1R9C6|F1R9C6_DANRE Uncharacterized protein OS=Danio rerio GN=PHB2 (2 of 2) PE=4 SV=1		7	4	6	6	6	6	7	7	6	6	5	5	5	6	1	4	2	3	0	1	1	1	1	2	1				1220900	1302300	1355600	1262100	1066400	1297000	886080	540390	959550	693670	660040	735250	0	0	0	0	0	0
914	F1R9V9;F1QR39	>tr|F1R9V9|F1R9V9_DANRE Uncharacterized protein (Fragment) OS=Danio rerio GN=appa PE=4 SV=1;>tr|F1QR39|F1QR39_DANRE Uncharacterized protein (Fragment) OS=Danio rerio GN=appa PE=4 SV=1		7	4	4	2	1	7	7	7	7	6	5	6	7	6	7	7	5	6	5	5	5	4	4	4	5				0	0	0	573900	511410	1049600	821470	648790	620540	1380500	2552900	920810	1481900	1567000	0	1308600	1974900	2063900
67	F1RAX1;F1QSZ6;E7EZX1;E7F5W3;E7FE07;Q4FZZ7;Q561S9;A4FVM2	>tr|F1RAX1|F1RAX1_DANRE Histone H2A (Fragment) OS=Danio rerio GN=zgc:110434 PE=3 SV=1;>tr|F1QSZ6|F1QSZ6_DANRE Histone H2A (Fragment) OS=Danio rerio GN=zgc:114037 PE=3 SV=1;>tr|E7EZX1|E7EZX1_DANRE Histone H2A OS=Danio rerio GN=CR762436.4 PE=3 SV=1;>tr|E7F5W		7	1	5	5	5	6	5	4	6	7	5	5	4	6	4	5	3	3	4	4	5	3	5	3	6				0	0	0	0	0	0	0	0	0	0	0	0	0	0	8411100	0	0	0
1128	F1RAY8	>tr|F1RAY8|F1RAY8_DANRE Uncharacterized protein (Fragment) OS=Danio rerio GN=CABZ01064941.1 PE=4 SV=1		7	6	3	5	3	7	4	6	5	5	6	6	7	6	5	5	4	6	6	6	6	5	7	6	4				182120	219580	0	458020	920470	1196900	1070400	519530	549210	1492800	1014800	1273600	1071600	1882200	475110	811980	731070	1459000
1156	F1REI0	>tr|F1REI0|F1REI0_DANRE Uncharacterized protein (Fragment) OS=Danio rerio GN=CABZ01051572.1 PE=4 SV=1		7	7	3	2	3	4	4	3	6	6	5	6	6	6	5	6	1	2	4	3	4	4	3	3	4				149430	142400	127790	61312	110710	334760	501900	888780	753210	2308300	1947200	1946200	896540	992740	0	160680	110000	288250
1162	F1RER1;Q5SPJ4	>tr|F1RER1|F1RER1_DANRE Uncharacterized protein (Fragment) OS=Danio rerio GN=serpina1 PE=3 SV=1;>tr|Q5SPJ4|Q5SPJ4_DANRE Serine (Or cysteine) proteinase inhibitor, clade A (Alpha-1 antiproteinase, antitrypsin), member 1 OS=Danio rerio GN=serpina1 PE=2 SV=1		7	1	5	4	5	6	6	5	5	4	5	5	5	6	6	6	4	7	5	4	7	5	6	6	5				1180300	1772300	1343500	10002000	5256700	6203500	9686300	3821600	1698100	20826000	14361000	15298000	7751600	6233200	15210000	4762600	6784600	10870000
1172	O93548;E9QIQ2	>tr|O93548|O93548_DANRE Embryonic 1 beta-globin OS=Danio rerio GN=hbbe1 PE=2 SV=1		7	5	6	6	4	6	7	7	7	7	7	4	5	5	4	4	1	1	1	2	1	1	0	1	1				9560100	9682700	6794800	1334000	1580000	1049100	3851000	6921400	7499200	578170	549080	593780	412190	823380	0	0	0	0
1201	Q1LV49	>tr|Q1LV49|Q1LV49_DANRE Novel protein similar to vertebrate osteomodulin (OMD) (Fragment) OS=Danio rerio GN=si:ch211-103f16.5 PE=4 SV=1		7	7	1	0	0	0	0	2	1	1	2	3	2	3	4	3	1	1	3	3	5	2	5	6	4				0	0	0	0	0	0	0	0	0	161250	480600	392360	2566600	1336200	0	0	636710	388710
1207	Q1LVK8	>tr|Q1LVK8|Q1LVK8_DANRE Novel protein similar to vertebrate signal peptidase complex (18kD) (SPC18) OS=Danio rerio GN=sec11a PE=2 SV=1		7	7	6	7	6	7	6	6	5	6	5	5	4	5	5	5	3	3	0	1	5	2	3	1	3				7699700	9036200	7752400	3191400	3386700	3781400	1598500	3353000	4013200	681950	1550500	1144600	1342100	1593400	618530	476890	0	0
1224	Q1MT25	>tr|Q1MT25|Q1MT25_DANRE Ceruloplasmin (Fragment) OS=Danio rerio GN=cp PE=2 SV=1		7	7	6	4	4	6	6	7	6	7	6	5	6	7	4	4	5	5	6	4	6	4	5	5	4				576100	406610	645080	1394000	1396800	1478300	688280	1555300	1078200	446390	725230	696270	540680	436500	1075900	1293600	1190000	688110
1250	Q4L216;E9QGU7	>tr|Q4L216|Q4L216_DANRE Type IV antifreeze protein OS=Danio rerio GN=zgc:161979 PE=2 SV=1		7	7	5	4	4	7	7	6	7	7	4	7	7	7	7	7	6	7	7	7	5	7	7	7	6				1458700	2288400	2931600	34647000	20485000	36063000	58113000	14079000	17094000	45725000	70490000	48400000	111210000	113910000	11633000	16853000	21153000	13984000
1264	Q503E6	>tr|Q503E6|Q503E6_DANRE Ezrin like OS=Danio rerio GN=ezrl PE=2 SV=1		7	4	5	5	2	5	5	4	4	3	4	6	6	6	3	4	4	4	2	4	4	5	3	4	4				0	0	0	0	0	0	0	0	0	0	0	110310	0	0	0	0	0	0
1265	Q503V2	>tr|Q503V2|Q503V2_DANRE Uncharacterized protein OS=Danio rerio GN=APOE (1 of 2) PE=2 SV=1		7	7	6	6	7	6	7	6	4	5	5	5	6	5	6	7	4	4	5	5	5	4	4	5	5				3194900	5155300	5724500	9859800	10628000	9068900	879400	1241900	900560	1406000	612010	743560	5077400	4880900	1398800	2735200	1936800	2167100
1300	Q5RI33	>tr|Q5RI33|Q5RI33_DANRE Connective tissue growth factor OS=Danio rerio GN=ctgf PE=2 SV=1		7	7	0	0	0	1	1	1	1	1	1	2	1	1	0	0	5	7	6	6	7	7	5	6	7				0	0	0	0	0	0	0	0	0	1389200	0	0	0	0	2968100	3466800	3535500	35020000
1331	Q66HW2	>tr|Q66HW2|Q66HW2_DANRE EH-domain containing 1 OS=Danio rerio GN=ehd1 PE=2 SV=1		7	5	5	5	4	3	5	5	3	4	4	3	3	2	1	0	1	0	0	0	2	2	0	0	0				2687700	3261700	2372000	1209800	1360800	789610	719290	1001000	952730	0	594010	0	0	0	0	0	0	0
1332	Q66HW7;E7F4U2	>tr|Q66HW7|Q66HW7_DANRE Retinal degradation slow 2 OS=Danio rerio GN=prph2a PE=2 SV=1		7	6	7	7	6	1	0	1	0	0	1	0	1	0	0	1	1	0	1	1	1	1	0	2	1				48666000	21219000	32487000	0	0	0	0	0	0	0	0	0	0	0	0	0	0	0
1359	Q6DGV5;Q6DI36;F1QAX4;F1RBB0;A5PLC7;B8JLC8;B8JLR8;F1R541;Q4V984;Q7ZSZ0;Q7ZUV5;F1QF90;E9QDA3;E7F5M2;F1QVZ4;Q502Q0;A8WHV0;A8WHV3;B8A665;Q5RGB5;Q6DHJ2;Q6DI07;F1QCC8;Q6DGH8;Q1L986;F1QBP2;Q7ZVX4;A1A5H9;A5PLA1;B0V0U3;Q68EK7;Q6P977;Q6PHI9;E7EY00;Q0P3V5;Q6DGB3;Q7T3A4;F1QV30;F1QBN3;B8A666;F1QYB8;F1R1X0;F1RAL3;E9QCV0	>tr|Q6DGV5|Q6DGV5_DANRE Uncharacterized protein OS=Danio rerio GN=RAB10 PE=2 SV=1		7	6	7	6	6	3	6	3	4	5	6	4	4	6	4	3	1	2	1	1	3	3	3	2	2				4025000	3186700	6402400	2364900	1847100	1508700	444420	1335400	1340700	298640	621860	703220	349050	433370	0	315950	0	0
1373	Q6DRE6	>tr|Q6DRE6|Q6DRE6_DANRE 60S ribosomal protein L12 OS=Danio rerio GN=rpl12 PE=2 SV=1		7	7	7	6	7	5	7	4	5	5	6	6	4	4	4	4	3	4	2	3	2	3	3	3	5				3027800	2958100	4026800	9007000	5215000	9243900	3586000	2298400	2235500	3609000	1993900	2351100	2095300	1726800	868690	539230	335200	708590
1382	Q6IMW6	>tr|Q6IMW6|Q6IMW6_DANRE Ribosomal protein S13 OS=Danio rerio GN=rps13 PE=2 SV=1		7	7	5	4	5	6	6	6	6	6	6	7	6	7	6	6	3	3	4	5	4	5	5	5	5				1203400	1049000	3245100	5281500	5273600	5536600	7571600	10336000	12383000	10068000	9393800	12086000	2716000	3526400	1181500	637630	258190	305180
1384	Q6IQ59	>tr|Q6IQ59|Q6IQ59_DANRE Ubiquinol-cytochrome c reductase core protein II OS=Danio rerio GN=uqcrc2 PE=2 SV=1		7	7	3	5	1	4	3	5	6	6	5	3	4	5	2	2	4	4	4	0	2	0	7	6	4				762640	979150	0	220060	168900	494940	315060	573750	326230	303950	251470	287430	100130	272380	739180	884260	255660	0
1406	Q6NWI7	>tr|Q6NWI7|Q6NWI7_DANRE Novel protein (Zgc:85681) OS=Danio rerio GN=tmed10 PE=2 SV=1		7	7	7	6	6	7	7	4	5	6	7	6	6	6	4	5	0	2	2	2	1	2	4	2	2				14801000	7481600	13174000	2915400	3819400	3814400	4057500	6401600	5281200	1433900	1597200	1645900	2782400	1374400	0	533490	1209800	155060
1487	Q6PFU1	>tr|Q6PFU1|Q6PFU1_DANRE CD81 antigen OS=Danio rerio GN=cd81 PE=2 SV=1		7	7	7	7	6	6	6	6	7	7	7	6	7	7	7	6	5	5	5	5	6	6	3	4	6				32008000	27200000	41776000	14758000	22084000	15904000	13039000	24856000	21739000	7852800	11023000	17692000	15604000	20348000	8265100	7362800	4844000	4845100
1499	Q6Q417	>tr|Q6Q417|Q6Q417_DANRE Ribosomal protein L7 OS=Danio rerio GN=rpl7 PE=2 SV=1		7	7	5	5	4	5	5	5	6	6	6	6	6	4	3	3	2	1	1	1	2	1	2	0	1				13976000	16688000	7570200	2395400	6881900	2673100	4634000	8099900	11194000	3826600	2476000	4170400	2450500	2207400	0	0	0	0
1504	Q6TGT9	>tr|Q6TGT9|Q6TGT9_DANRE Splicing factor, arginine/serine-rich 5 OS=Danio rerio GN=srsf5a PE=2 SV=1		7	5	3	5	2	6	6	6	7	7	7	7	7	7	7	7	6	4	3	4	4	2	6	2	5				2407800	1518200	1748900	4446100	6339300	4201700	30174000	11453000	19750000	26738000	16497000	15456000	18213000	19854000	2748300	3050900	2694200	3663100
1623	Q8QGV5	>tr|Q8QGV5|Q8QGV5_DANRE Lipocalin-type prostaglandin D synthase-like protein OS=Danio rerio GN=ptgds PE=2 SV=1		7	5	1	0	1	3	2	3	4	2	2	4	5	4	4	5	5	4	5	4	7	5	4	5	6				0	0	0	395220	214610	396090	398150	308940	68019	184640	218690	315840	629110	358790	904240	10014000	14690000	18369000
1632	Q90WX6	>tr|Q90WX6|Q90WX6_DANRE Guanine nucleotide binding protein (G protein), alpha transducing activity polypeptide 1 OS=Danio rerio GN=gnat1 PE=2 SV=1		7	5	5	7	6	3	2	1	4	4	4	1	1	2	2	1	1	1	0	0	0	1	0	0	1				3864000	2837900	3986400	0	0	0	50989	82273	82545	0	0	0	0	0	0	0	0	0
343	CON__QQ6IFU6	>QQ6IFU6 TREMBL:Q6IFU6|Type I hair keratin KA35 - Homo sapiens (Human).		6	6	0	0	6	0	0	0	0	1	1	1	1	1	0	0	0	0	0	0	0	0	0	1	0			+	0	0	2923300	0	0	0	0	0	0	0	0	0	0	0	0	0	0	0
345	CON__QQ86Y46	>QQ86Y46 TREMBL:Q86Y46|K2C73_HUMAN Keratin, type II cytoskeletal 73 OS=Homo sapiens GN=KRT73 PE=1 SV=1		6	1	3	5	5	6	4	2	4	4	4	6	3	5	5	6	4	1	2	2	5	4	2	1	5			+	0	0	0	0	0	0	0	0	0	0	0	0	0	0	0	0	0	0
1175	P62247;B5DDE8	>sp|P62247|RS8_DANRE 40S ribosomal protein S8 OS=Danio rerio GN=rps8 PE=2 SV=2;>tr|B5DDE8|B5DDE8_DANRE 40S ribosomal protein S8 OS=Danio rerio GN=LOC100000836 PE=2 SV=1		6	6	4	3	4	5	5	4	6	6	6	6	5	6	4	5	3	4	2	2	4	4	4	4	3				1799300	2256700	1972000	1530700	2304100	1425400	8619600	11738000	12734000	6051100	4750200	5622400	5912200	1960500	621880	547940	257170	255490
1460	Q6PBI5	>sp|Q6PBI5|RS25_DANRE 40S ribosomal protein S25 OS=Danio rerio GN=rps25 PE=2 SV=1		6	6	5	5	6	5	5	5	5	5	5	4	5	5	5	5	3	2	0	3	2	3	4	3	2				1355000	3018700	2004800	5894100	4964800	3947100	3717900	4040600	3389600	3038900	3694500	5011600	2086400	1741800	1328100	479830	0	706540
1566	Q7ZU99;Q29RA2;F1QSI7	>sp|Q7ZU99|TERA_DANRE Transitional endoplasmic reticulum ATPase OS=Danio rerio GN=vcp PE=1 SV=1		6	6	4	5	4	1	0	0	6	6	6	5	5	6	3	4	1	0	0	1	3	1	1	0	1				809310	2658600	862020	0	0	0	412090	623240	500880	316330	508850	281220	300810	190460	0	0	0	0
1616	Q8JFV8	>sp|Q8JFV8|VAT1_DANRE Synaptic vesicle membrane protein VAT-1 homolog OS=Danio rerio GN=vat1 PE=2 SV=1		6	6	5	5	5	4	4	2	2	3	3	2	2	2	2	3	1	3	1	1	1	1	2	1	1				2643500	2473000	2042500	659960	900030	794120	2008100	1183500	1699800	681910	746440	490670	441900	350430	0	237680	0	0
994	Q8JGR4;F1QYU1	>sp|Q8JGR4|RL24_DANRE 60S ribosomal protein L24 OS=Danio rerio GN=rpl24 PE=2 SV=1;>tr|F1QYU1|F1QYU1_DANRE Uncharacterized protein (Fragment) OS=Danio rerio GN=rpl24 PE=4 SV=1		6	6	3	2	3	3	4	3	4	6	3	4	3	4	2	2	2	1	1	1	2	1	1	1	2				419700	541950	531460	696860	749830	759160	2393800	3221300	2013300	1386100	1971400	1522000	0	0	304430	0	0	0
1661	Q9PUE4	>sp|Q9PUE4|COPG2_DANRE Coatomer subunit gamma-2 OS=Danio rerio GN=copg2 PE=2 SV=2		6	6	3	1	2	1	2	3	4	5	3	2	3	3	2	1	1	1	0	0	0	1	0	0	0				158830	0	166700	0	87118	75803	134630	680360	528100	85380	93869	245000	0	0	0	0	0	0
12	A1L1V4	>tr|A1L1V4|A1L1V4_DANRE Lysyl oxidase-like 2b OS=Danio rerio GN=loxl2b PE=2 SV=1		6	6	1	1	1	3	4	2	6	6	4	6	6	6	5	6	2	1	2	4	3	4	3	2	2				0	0	0	816840	597740	1742200	3176300	2229800	3019000	7533400	5645900	5541000	3823000	3534000	919860	0	1645000	4167800
53	A3KPG5;A3KPH5;A3KPH6	>tr|A3KPG5|A3KPG5_DANRE Novel pentaxin family domain containing protein OS=Danio rerio GN=si:ch211-234p6.12 PE=4 SV=1		6	5	4	4	1	6	6	6	5	5	3	5	4	5	6	4	5	5	4	4	5	5	4	5	5				629840	737930	0	5147600	6418500	4446300	1385500	874390	468900	2069300	1774400	1392600	343840	549530	13338000	13553000	13000000	34960000
64	A3KQW5;Q8JGS9;E9QJF2;E9QHH6	>tr|A3KQW5|A3KQW5_DANRE Ribosomal protein S18 OS=Danio rerio GN=rps18 PE=3 SV=1;>sp|Q8JGS9|RS18_DANRE 40S ribosomal protein S18 OS=Danio rerio GN=rps18 PE=2 SV=1;>tr|E9QJF2|E9QJF2_DANRE Uncharacterized protein OS=Danio rerio GN=rps18 PE=3 SV=1		6	6	2	3	3	5	4	3	5	4	4	6	6	5	4	5	1	1	1	2	2	2	1	1	2				1805900	1010300	1983100	1048900	2303400	4434900	2980400	5541100	2920200	4741800	2717200	3024500	1844200	1127800	0	0	0	561570
71	A4VAK4	>tr|A4VAK4|A4VAK4_DANRE Heat shock protein 1 OS=Danio rerio GN=hspb1 PE=2 SV=1		6	6	0	0	0	0	0	0	1	1	1	5	6	5	4	1	3	1	1	2	6	6	4	2	6				0	0	0	0	0	0	0	0	0	3038400	1837100	3011100	835170	0	814780	0	0	487790
113	A8E526	>tr|A8E526|A8E526_DANRE Rpl14 protein OS=Danio rerio GN=rpl14 PE=2 SV=1		6	6	6	4	6	5	5	5	4	6	4	5	4	4	3	4	3	2	1	1	3	2	3	4	4				3981400	6363100	4782000	4337800	4350100	4676700	9304000	9092000	6500900	4463700	3118500	6794900	3745900	2397900	1163900	876510	0	0
169	B0S5D9	>tr|B0S5D9|B0S5D9_DANRE Transmembrane 9 superfamily member 2 OS=Danio rerio GN=tm9sf2 PE=4 SV=1		6	6	6	6	6	4	5	4	3	4	4	2	2	3	3	4	1	1	0	0	1	0	2	0	3				5943000	5637100	6021600	1895400	866170	943540	1275500	2459400	3151300	466410	728560	759960	846820	911550	0	0	0	0
177	B0S602;F1RBP8	>tr|B0S602|B0S602_DANRE Fibronectin 1 OS=Danio rerio GN=fn1 PE=4 SV=1;>tr|F1RBP8|F1RBP8_DANRE Uncharacterized protein OS=Danio rerio GN=fn1 PE=4 SV=1		6	2	1	1	0	4	3	3	2	1	1	3	3	2	2	2	3	3	3	3	5	5	2	3	2				0	0	0	0	0	0	0	0	0	0	0	0	0	0	0	0	0	0
203	B0UYJ6;F1Q8B4;F1QFV7	>tr|B0UYJ6|B0UYJ6_DANRE Novel protein similar to vertebrate catechol-O-methyltransferase (COMT) (Fragment) OS=Danio rerio GN=DKEY-52H10.1 PE=4 SV=1;>tr|F1Q8B4|F1Q8B4_DANRE Uncharacterized protein (Fragment) OS=Danio rerio GN=comta PE=4 SV=1		6	6	6	6	6	4	6	4	4	6	5	2	1	4	1	0	1	0	0	0	1	0	0	0	0				3196300	2610000	1482800	377060	457750	432670	357950	897160	889170	209230	0	127760	0	0	0	0	0	0
214	B1B5D9;F1R5P6	>tr|B1B5D9|B1B5D9_DANRE Neutral sphingomyelinase 2 OS=Danio rerio GN=smpd3 PE=2 SV=1		6	6	4	6	5	2	1	1	3	4	5	1	3	2	3	4	2	0	0	0	2	0	0	0	2				6470700	8246300	3760000	0	0	0	0	5350400	3787200	0	0	0	40774000	31242000	5662200	0	0	0
216	B3DFN3	>tr|B3DFN3|B3DFN3_DANRE Lamin B2 OS=Danio rerio GN=lmnb2 PE=2 SV=1		6	6	0	1	0	3	1	2	5	2	1	5	5	5	4	3	3	3	0	4	2	3	3	3	3				0	0	0	179840	0	524550	355530	0	0	529570	315260	507410	347450	309950	250120	235480	0	245850
242	B7SDQ7;Q90X49	>tr|B7SDQ7|B7SDQ7_DANRE CL2 OS=Danio rerio GN=ccdc80 PE=2 SV=1;>sp|Q90X49|CCD80_DANRE Coiled-coil domain-containing protein 80 OS=Danio rerio GN=ccdc80 PE=2 SV=1		6	6	0	1	1	5	5	5	4	4	5	5	2	5	3	5	3	4	4	5	6	5	5	4	6				0	0	0	733840	656390	789870	595120	593670	467870	630180	497980	783250	980860	658230	708100	951930	698400	1002100
286	B8JJ32	>tr|B8JJ32|B8JJ32_DANRE Novel protein (Zgc:158660) OS=Danio rerio GN=DKEY-250O4.3 PE=4 SV=1		6	6	5	5	5	5	5	5	5	5	5	6	6	4	5	5	5	3	2	1	3	4	4	3	4				2457500	1966800	2390800	1421700	1658600	1678800	650660	1830000	1659700	453500	789620	904920	1511600	694340	606880	1046400	345250	0
312	B8JMK8;P35359	>tr|B8JMK8|B8JMK8_DANRE Retinal rod opsin pigment rh1.1 OS=Danio rerio GN=rho PE=2 SV=1;>sp|P35359|OPSD_DANRE Rhodopsin OS=Danio rerio GN=rho PE=2 SV=2		6	6	6	4	6	0	0	0	0	1	1	0	0	0	1	1	0	0	0	0	0	0	1	0	0				146580000	101420000	133760000	0	0	0	0	0	0	0	0	0	0	0	0	0	0	0
352	E7EXC4;F1QIY9	>tr|E7EXC4|E7EXC4_DANRE Uncharacterized protein OS=Danio rerio GN=serpinb1l4 PE=3 SV=1;>tr|F1QIY9|F1QIY9_DANRE Uncharacterized protein OS=Danio rerio GN=serpinb1l4 PE=3 SV=1		6	1	2	2	1	1	1	1	3	3	2	2	1	1	1	0	1	1	1	1	5	1	4	1	1				0	0	0	0	0	0	0	0	0	0	0	0	0	0	0	0	0	0
387	E7F1B8;F1QIU5	>tr|E7F1B8|E7F1B8_DANRE Uncharacterized protein OS=Danio rerio GN=OTTDARG00000020739 PE=4 SV=1;>tr|F1QIU5|F1QIU5_DANRE Uncharacterized protein OS=Danio rerio GN=mcamb PE=4 SV=1		6	6	0	1	2	5	6	6	1	3	1	1	0	1	0	0	0	0	0	0	0	0	0	0	0				0	0	461170	2378900	3416000	1426900	0	360150	0	0	0	0	0	0	0	0	0	0
394	E7F1P7	>tr|E7F1P7|E7F1P7_DANRE Uncharacterized protein OS=Danio rerio GN=OTTDARG00000032173 PE=4 SV=1		6	3	5	5	5	6	5	6	5	4	6	6	6	4	5	6	3	3	3	4	4	3	5	4	5				501770	592210	571030	1184800	832130	1315900	335320	408070	500380	680210	614280	693260	1781100	1606900	371960	376680	445750	965700
395	E7F1P8;Q6DG66;F1QQ61	>tr|E7F1P8|E7F1P8_DANRE Uncharacterized protein OS=Danio rerio GN=OTTDARG00000022448 PE=3 SV=1;>tr|Q6DG66|Q6DG66_DANRE Uncharacterized protein OS=Danio rerio GN=zgc:92035 PE=2 SV=1		6	0	3	5	4	1	1	2	3	4	2	3	3	4	3	2	3	2	0	3	2	2	3	2	2				0	0	0	0	0	0	0	0	0	0	0	0	0	0	12468	0	0	0
450	E7F6W5;Q9PVF5	>tr|E7F6W5|E7F6W5_DANRE Uncharacterized protein OS=Danio rerio GN=cmn PE=4 SV=1;>tr|Q9PVF5|Q9PVF5_DANRE Calymmin OS=Danio rerio GN=cmn PE=2 SV=1		6	6	2	0	1	6	6	5	1	1	0	6	6	6	3	3	0	0	0	0	3	0	0	0	2				737540	0	0	18033000	18595000	4395000	0	0	0	7204600	7899400	13049000	4746400	5324800	0	0	0	0
461	E7F7W7	>tr|E7F7W7|E7F7W7_DANRE Uncharacterized protein OS=Danio rerio GN=FP236168.1 PE=3 SV=1		6	6	2	1	1	5	4	5	1	1	2	3	5	5	2	2	1	1	0	2	3	3	3	2	3				250710	0	0	237620	179290	177940	0	0	0	417580	1163800	1277700	128900	297450	0	0	0	326650
496	E7FAZ5	>tr|E7FAZ5|E7FAZ5_DANRE Uncharacterized protein OS=Danio rerio GN=hp1bp3 PE=3 SV=1		6	6	4	3	4	4	4	2	5	5	4	5	5	4	4	4	2	2	3	5	3	2	4	3	3				1008500	1085800	844440	590140	1048800	3205900	5528800	7761300	6608200	5390300	3334900	3513600	2736000	2552000	2517300	575930	953830	412240
501	E7FBA5;Q6DC20;Q6DHP3;F1R085	>tr|E7FBA5|E7FBA5_DANRE Uncharacterized protein OS=Danio rerio GN=ARF4 PE=3 SV=1;>tr|Q6DC20|Q6DC20_DANRE Uncharacterized protein OS=Danio rerio GN=ARF4 PE=2 SV=1;>tr|Q6DHP3|Q6DHP3_DANRE ADP-ribosylation factor 3a OS=Danio rerio GN=arf3a PE=2 SV=1;>tr|F1R08		6	3	5	4	4	4	2	3	4	6	6	2	3	5	2	3	3	0	0	1	2	0	1	1	1				1779900	2023600	3202100	265630	424170	228860	1137500	1124300	2266800	500410	255190	271110	110670	129260	103570	0	0	0
509	E7FC32	>tr|E7FC32|E7FC32_DANRE Uncharacterized protein OS=Danio rerio GN=BX927257.1 PE=3 SV=1		6	1	4	5	4	4	5	3	5	5	6	5	5	5	4	3	4	4	3	2	6	6	4	4	3				0	0	0	0	0	0	0	0	0	0	0	0	0	0	0	0	0	0
65	E7FFH2;A4FVH2;Q0D276	>tr|E7FFH2|E7FFH2_DANRE Uncharacterized protein OS=Danio rerio GN=zgc:153846 PE=4 SV=1;>tr|A4FVH2|A4FVH2_DANRE Crystallin, gamma M1 OS=Danio rerio GN=crygm1 PE=2 SV=1;>tr|Q0D276|Q0D276_DANRE Novel protein (Zgc:153846) OS=Danio rerio GN=DKEY-84D14.6 PE=2 SV		6	2	4	5	5	1	0	0	2	3	1	0	0	1	1	1	0	0	0	0	0	0	0	0	0				0	0	0	0	0	0	0	476950	0	0	0	0	0	0	0	0	0	0
558	E7FGF6;E9QFE1	>tr|E7FGF6|E7FGF6_DANRE Uncharacterized protein OS=Danio rerio GN=si:ch211-120k19.2 PE=4 SV=1;>tr|E9QFE1|E9QFE1_DANRE Uncharacterized protein OS=Danio rerio GN=si:ch211-120k19.2 PE=4 SV=1		6	1	4	3	4	4	5	3	3	4	4	2	2	4	2	2	3	2	2	2	2	2	3	3	2				0	0	0	0	0	0	0	0	0	0	0	0	0	0	0	0	0	0
584	E9QDI1;E9QFX0	>tr|E9QDI1|E9QDI1_DANRE Uncharacterized protein OS=Danio rerio GN=apoc1l PE=4 SV=1;>tr|E9QFX0|E9QFX0_DANRE Uncharacterized protein OS=Danio rerio GN=apoc1l PE=4 SV=1		6	6	3	2	2	4	4	6	4	4	3	3	3	3	5	4	4	5	5	5	2	4	4	5	5				1451600	1277100	0	8892100	4228500	12626000	10860000	2935100	1156400	12675000	17250000	7499500	20762000	30978000	19798000	19813000	37595000	44021000
684	F1Q8F0	>tr|F1Q8F0|F1Q8F0_DANRE Integrin beta (Fragment) OS=Danio rerio GN=itgb1b PE=3 SV=1		6	5	5	3	5	5	6	5	4	5	4	2	3	2	4	3	1	2	1	1	2	2	1	1	1				1391000	1061600	694330	6705000	15368000	11453000	554600	750080	1125800	0	582620	0	302780	965780	0	797860	0	0
705	F1QAJ7;E9QJ49;F1QVY4;F1REN2;F1QJN1	>tr|F1QAJ7|F1QAJ7_DANRE Uncharacterized protein OS=Danio rerio GN=slc25a3b PE=3 SV=1;>tr|E9QJ49|E9QJ49_DANRE Uncharacterized protein OS=Danio rerio GN=slc25a3b PE=3 SV=1		6	6	5	6	5	5	6	4	3	6	6	1	5	5	5	4	2	3	2	2	2	1	3	2	1				42013000	13205000	53282000	26126000	25006000	37703000	1644200	11883000	12475000	0	2049400	3300500	2470300	2415100	4277700	2606200	4144900	1375200
742	F1QCP8;F1R7B2	>tr|F1QCP8|F1QCP8_DANRE Uncharacterized protein OS=Danio rerio GN=ctskl PE=3 SV=1;>tr|F1R7B2|F1R7B2_DANRE Uncharacterized protein (Fragment) OS=Danio rerio GN=ctskl PE=3 SV=1		6	6	4	4	3	3	5	5	3	3	2	1	1	1	1	2	4	4	3	2	0	0	1	0	0				3354400	4014500	1865300	2532300	4822500	2581000	2122500	2998600	2223000	0	0	0	0	469050	6687800	2030800	4036600	470230
784	F1QFP3	>tr|F1QFP3|F1QFP3_DANRE Uncharacterized protein OS=Danio rerio GN=f7 PE=3 SV=1		6	6	2	1	1	3	3	3	3	2	1	3	2	3	2	2	4	2	2	4	4	3	1	3	5				1242700	0	0	1485600	3538200	2501000	2660500	1530700	0	3205500	2468200	2237800	8975000	3799500	3735500	0	0	2423900
816	F1QHG3	>tr|F1QHG3|F1QHG3_DANRE Uncharacterized protein OS=Danio rerio GN=zgc:173729 PE=3 SV=1		6	1	2	2	1	1	1	1	3	3	2	2	1	1	1	0	1	1	1	1	5	2	5	1	2				208120	275450	0	0	0	0	790820	176400	233380	218240	0	0	0	0	0	0	0	0
758	F1QJ80;F1QDZ4	>tr|F1QJ80|F1QJ80_DANRE Uncharacterized protein (Fragment) OS=Danio rerio GN=tyr PE=4 SV=1;>tr|F1QDZ4|F1QDZ4_DANRE Uncharacterized protein OS=Danio rerio GN=tyr PE=4 SV=1		6	6	5	5	6	3	4	3	0	1	2	1	1	1	3	2	0	0	0	0	0	0	1	1	0				4112200	2882600	3923800	368230	473550	266560	0	0	136540	0	0	0	549610	243450	0	0	0	0
844	F1QJD8;F1RB45	>tr|F1QJD8|F1QJD8_DANRE Uncharacterized protein (Fragment) OS=Danio rerio GN=si:ch1073-464p5.4 PE=4 SV=1;>tr|F1RB45|F1RB45_DANRE Uncharacterized protein OS=Danio rerio GN=si:ch1073-464p5.4 PE=4 SV=1		6	2	3	4	4	6	4	6	5	4	6	6	5	4	5	6	5	4	3	3	6	5	4	2	5				0	228700	0	266400	299470	360490	235560	225020	229690	319810	0	0	532490	432340	281180	0	0	0
847	F1QJG6;E7F806	>tr|F1QJG6|F1QJG6_DANRE Uncharacterized protein OS=Danio rerio GN=sfrp5 PE=4 SV=1		6	6	0	0	0	6	5	5	1	0	0	1	1	1	0	0	0	0	0	1	0	0	0	0	0				0	0	0	1349900	897070	2610800	0	0	0	0	0	0	0	0	0	0	0	0
872	F1QLH9	>tr|F1QLH9|F1QLH9_DANRE Uncharacterized protein OS=Danio rerio GN=nucb1 PE=4 SV=1		6	6	2	2	2	4	4	4	6	4	3	5	6	6	6	6	2	3	4	4	3	4	4	3	4				49746	73124	128630	212530	73829	315690	1527200	599520	222470	2974500	6483700	3101400	4309800	5671300	591550	267890	527850	1554800
894	F1QNY3;Q7ZU69	>tr|F1QNY3|F1QNY3_DANRE Uncharacterized protein (Fragment) OS=Danio rerio GN=psmd13 PE=4 SV=1;>tr|Q7ZU69|Q7ZU69_DANRE Proteasome (Prosome, macropain) 26S subunit, non-ATPase, 13 OS=Danio rerio GN=psmd13 PE=2 SV=1		6	6	2	2	1	1	2	1	5	5	5	3	3	3	2	3	2	2	0	0	1	1	1	1	1				0	0	0	0	0	0	397900	990150	882430	211830	359220	232490	0	235880	0	145100	0	0
912	F1QR06	>tr|F1QR06|F1QR06_DANRE Uncharacterized protein (Fragment) OS=Danio rerio GN=emid1 PE=4 SV=1		6	5	3	3	2	3	3	3	4	4	3	4	3	3	5	5	3	2	3	3	3	2	2	4	5				8455900	4942100	1379700	2797300	3838800	2306800	2036500	4202400	2062200	2821400	1902300	3027000	31646000	31188000	6478600	16056000	8178900	1571800
924	F1QS89;Q5RHG8;F1QS90;F1Q9V4	>tr|F1QS89|F1QS89_DANRE Uncharacterized protein OS=Danio rerio GN=cad PE=3 SV=1;>tr|Q5RHG8|Q5RHG8_DANRE Carbamoyl-phosphate synthetase 2, aspartate transcarbamylase, and dihydroorotase OS=Danio rerio GN=cad PE=2 SV=1		6	6	6	4	6	4	4	3	0	1	0	0	0	0	0	0	0	0	0	0	0	0	0	0	0				3963500	1916500	2765400	578620	887310	579800	0	0	0	0	0	0	0	0	0	0	0	0
925	F1QSA6	>tr|F1QSA6|F1QSA6_DANRE Uncharacterized protein (Fragment) OS=Danio rerio GN=prom1b PE=4 SV=1		6	1	6	5	6	0	0	0	0	1	0	0	0	0	0	0	1	0	0	0	0	0	0	0	0				0	0	1141600	0	0	0	0	0	0	0	0	0	0	0	0	0	0	0
563	F1QTN7;Q7ZUP0;E9QB42	>tr|F1QTN7|F1QTN7_DANRE Uncharacterized protein OS=Danio rerio GN=anp32a PE=4 SV=1;>sp|Q7ZUP0|AN32A_DANRE Acidic leucine-rich nuclear phosphoprotein 32 family member A OS=Danio rerio GN=anp32a PE=2 SV=1;>tr|E9QB42|E9QB42_DANRE Uncharacterized protein OS=Da		6	3	5	3	4	5	5	5	4	4	4	6	5	6	5	6	5	5	4	4	3	5	3	5	5				5549600	5230400	6807600	19126000	14189000	16388000	8454100	5736000	3750300	8527800	8174700	7898300	8120300	8886700	2155400	3603600	6581400	6909100
945	F1QTU1	>tr|F1QTU1|F1QTU1_DANRE Uncharacterized protein OS=Danio rerio GN=pde6c PE=4 SV=1		6	6	5	6	5	0	0	1	0	0	0	1	0	0	0	1	0	0	0	0	1	1	0	0	0				2664100	2025300	2860900	0	0	0	0	0	0	0	0	0	0	0	0	0	0	0
954	F1QUR3	>tr|F1QUR3|F1QUR3_DANRE Uncharacterized protein OS=Danio rerio GN=pdia3 PE=3 SV=1		6	6	3	0	3	4	5	4	6	6	4	5	4	6	5	6	3	1	1	3	2	2	3	1	4				401800	0	411680	1378200	1308600	1248700	987510	604270	531130	1198900	1998200	1443700	468420	717780	0	0	0	710600
959	F1QV19	>tr|F1QV19|F1QV19_DANRE Uncharacterized protein OS=Danio rerio GN=ggct PE=4 SV=1		6	6	1	2	2	5	6	6	5	6	5	6	6	5	6	6	5	5	4	4	2	5	3	2	4				0	492660	483130	3688200	6247100	18583000	41775000	6003900	7837800	50323000	50276000	40970000	50232000	46953000	13783000	5378300	6798200	14594000
510	F1QW52;E7FC55	>tr|F1QW52|F1QW52_DANRE Uncharacterized protein (Fragment) OS=Danio rerio GN=habp2 PE=3 SV=1;>tr|E7FC55|E7FC55_DANRE Uncharacterized protein OS=Danio rerio GN=habp2 PE=3 SV=1		6	6	2	2	2	5	6	6	6	5	6	6	6	6	6	6	4	5	5	5	3	4	5	4	2				597070	0	0	3513100	3166000	5555000	1847400	1905100	1242300	3136600	2062300	2066600	2556400	2791300	1321000	2146100	2083000	1308100
969	F1QW82	>tr|F1QW82|F1QW82_DANRE Uncharacterized protein OS=Danio rerio GN=nucb2a PE=4 SV=1		6	6	2	2	2	2	2	3	5	3	3	5	5	6	6	6	2	2	5	2	3	2	2	2	3				123450	122250	130240	275220	178400	473810	1370300	560650	552130	3894000	5568100	3495700	1441000	1482600	1046100	2211700	1487400	3823800
980	F1QXE9;Q7SZ53;F1QXE4;A3KPH8	>tr|F1QXE9|F1QXE9_DANRE Uncharacterized protein OS=Danio rerio GN=si:ch211-234p6.13 PE=4 SV=1;>tr|Q7SZ53|Q7SZ53_DANRE Novel protein (Wu:fi20c07) OS=Danio rerio GN=si:ch211-234p6.13 PE=2 SV=2		6	5	2	2	2	4	4	3	3	2	3	3	2	3	2	3	6	4	4	4	6	6	3	3	5				0	0	926160	1258800	1013600	633760	430300	0	385220	579890	0	615400	0	615060	24241000	7390700	2505800	5482000
986	F1QY96;Q6NUZ3;A5WVY4;F6NN54;Q7SZC9	>tr|F1QY96|F1QY96_DANRE Uncharacterized protein OS=Danio rerio GN=syncrip PE=4 SV=1;>tr|Q6NUZ3|Q6NUZ3_DANRE Synaptotagmin binding, cytoplasmic RNA interacting protein OS=Danio rerio GN=syncrip PE=2 SV=1;>tr|A5WVY4|A5WVY4_DANRE Synaptotagmin binding, cytopl		6	3	5	4	5	3	2	3	4	6	5	5	3	5	4	5	1	3	0	0	4	4	3	2	0				637540	928720	625680	362750	394130	239900	456850	825210	820760	429620	307370	376170	228420	298110	0	270410	0	0
1034	F1R314	>tr|F1R314|F1R314_DANRE Uncharacterized protein OS=Danio rerio GN=zgc:110425 PE=3 SV=1		6	1	6	5	5	6	6	6	4	6	6	6	6	5	5	6	3	5	4	6	2	5	3	2	5				1095300	1130500	1145200	1442000	1787600	846660	9744900	4818800	23226000	24615000	5357500	4375500	4047800	4515700	6017700	3879400	2098700	6419100
1038	F1R3D3;Q5MJ86	>tr|F1R3D3|F1R3D3_DANRE Glyceraldehyde-3-phosphate dehydrogenase OS=Danio rerio GN=gapdhs PE=3 SV=1;>sp|Q5MJ86|G3PT_DANRE Glyceraldehyde 3-phosphate dehydrogenase, testis-specific OS=Danio rerio GN=gapdhs PE=2 SV=1		6	6	4	4	4	0	0	2	3	4	4	2	2	3	1	1	1	4	0	3	5	3	3	3	2				840330	1700200	1036700	0	0	0	445720	661690	356020	428560	465430	414450	0	0	0	797620	0	1239200
781	F1R5A4;F1QFD8;E9QIN9	>tr|F1R5A4|F1R5A4_DANRE Uncharacterized protein OS=Danio rerio GN=zgc:110200 PE=4 SV=1;>tr|F1QFD8|F1QFD8_DANRE Uncharacterized protein OS=Danio rerio GN=zgc:110200 PE=4 SV=1;>tr|E9QIN9|E9QIN9_DANRE Uncharacterized protein OS=Danio rerio GN=zgc:110200 PE=4		6	1	6	6	6	6	5	4	5	5	6	4	3	3	3	4	4	2	2	0	2	2	3	2	3				0	0	0	0	0	0	0	0	75928	0	0	0	0	0	0	0	0	0
640	F1R6R2;F1Q5P0	>tr|F1R6R2|F1R6R2_DANRE Uncharacterized protein (Fragment) OS=Danio rerio GN=si:ch211-270n8.1 PE=4 SV=1;>tr|F1Q5P0|F1Q5P0_DANRE Uncharacterized protein OS=Danio rerio GN=si:ch211-270n8.1 PE=4 SV=1		6	6	2	0	0	5	5	6	2	0	0	3	1	3	1	0	1	1	0	1	2	1	2	4	0				40168	0	0	2130700	870920	2831300	0	0	0	53592	0	85259	0	0	0	0	0	0
777	F1R9X5;Q6GMJ1;F1QF59;F1R2A2;Q1LUZ9;E7FCK7	>tr|F1R9X5|F1R9X5_DANRE Uncharacterized protein (Fragment) OS=Danio rerio GN=ces3 PE=4 SV=1;>tr|Q6GMJ1|Q6GMJ1_DANRE Novel protein similar to H.sapiens carboxylesterase (Zgc:153863) (Fragment) OS=Danio rerio GN=ces2 PE=2 SV=1;>tr|F1QF59|F1QF59_DANRE Unchara		6	6	3	4	1	5	5	4	0	1	0	3	1	2	1	1	1	6	3	6	4	4	3	2	3				173970	174700	0	287010	377090	388640	0	0	0	121750	0	115320	0	0	0	187210	192530	638270
1129	F1RB31;Q503V9	>tr|F1RB31|F1RB31_DANRE Uncharacterized protein OS=Danio rerio GN=zgc:110053 PE=4 SV=1;>sp|Q503V9|ENDUB_DANRE Poly(U)-specific endoribonuclease-B OS=Danio rerio GN=endoub PE=2 SV=1		6	6	6	6	5	1	1	0	0	0	0	0	0	0	1	0	0	0	1	0	1	0	0	0	1				15957000	34950000	4939200	0	0	0	0	0	0	0	0	0	0	0	0	0	0	0
1146	F1RDA6	>tr|F1RDA6|F1RDA6_DANRE NADH-ubiquinone oxidoreductase 75 kDa subunit OS=Danio rerio GN=ndufs1 PE=3 SV=1		6	6	3	2	4	2	2	1	3	3	3	2	3	2	0	0	1	2	3	0	2	1	6	3	3				803530	0	147780	375350	340040	0	143730	281600	284670	0	141870	262320	0	0	0	321620	244770	0
601	F1REJ3;E9QG86;Q6TNS5;E9QF73;E9QCD6	>tr|F1REJ3|F1REJ3_DANRE Uncharacterized protein OS=Danio rerio GN=zgc:153867 PE=4 SV=1;>tr|E9QG86|E9QG86_DANRE Uncharacterized protein OS=Danio rerio GN=zgc:153867 PE=4 SV=1;>tr|Q6TNS5|Q6TNS5_DANRE Myosin light chain alkali, smooth-muscle isoform OS=Danio		6	2	3	3	3	6	6	6	3	3	4	5	5	5	4	4	3	4	3	3	3	3	5	4	4				0	0	0	6926800	1636700	1625900	0	0	975720	1050800	1319300	988680	449020	467360	0	314420	0	0
1159	F1REL9;F1QEB6	>tr|F1REL9|F1REL9_DANRE Uncharacterized protein OS=Danio rerio GN=lamb1b PE=4 SV=1;>tr|F1QEB6|F1QEB6_DANRE Uncharacterized protein (Fragment) OS=Danio rerio GN=lamb1b PE=4 SV=1		6	6	0	0	0	2	3	3	1	0	0	0	0	0	0	0	2	4	3	1	2	1	5	4	4				0	0	0	185820	145230	183420	0	0	0	0	0	0	0	0	0	138820	138690	0
1178	Q08BC3	>tr|Q08BC3|Q08BC3_DANRE Novel protein OS=Danio rerio GN=si:ch211-133n4.4 PE=2 SV=1		6	6	1	1	1	5	3	4	2	4	3	4	3	4	4	4	1	2	1	1	0	2	2	0	0				0	0	0	844340	0	1047200	0	1058500	1882700	1042500	978360	1998400	858420	1392600	0	0	0	0
1191	Q1L8P0	>tr|Q1L8P0|Q1L8P0_DANRE Novel protein (Zgc:85621) OS=Danio rerio GN=crtap PE=2 SV=1		6	6	5	4	3	4	5	4	5	5	5	5	5	5	5	6	4	4	4	4	5	5	4	4	3				583610	562260	279660	437150	320560	631770	595900	632340	524780	937140	506440	552020	1046200	852290	388180	676790	802480	972440
1194	Q1L950;Q6NZ06	>tr|Q1L950|Q1L950_DANRE Interleukin enhancer binding factor 2 OS=Danio rerio GN=ilf2 PE=2 SV=1;>sp|Q6NZ06|ILF2_DANRE Interleukin enhancer-binding factor 2 homolog OS=Danio rerio GN=ilf2 PE=2 SV=1		6	6	6	5	5	3	3	4	2	3	3	2	2	3	2	1	0	1	0	0	2	1	0	0	1				2556200	3234700	3967400	254500	810830	257000	115730	182860	229160	83543	333110	117420	215660	0	0	0	0	0
1216	Q1LXD2;Q91398	>tr|Q1LXD2|Q1LXD2_DANRE Casein kinase 2 beta OS=Danio rerio GN=ck2b PE=2 SV=1;>sp|Q91398|CSK2B_DANRE Casein kinase II subunit beta OS=Danio rerio GN=csnk2b PE=2 SV=1		6	6	6	4	6	4	5	5	0	2	1	0	0	0	0	0	0	0	0	0	0	1	0	0	0				7390900	7441000	5429900	4322400	7119200	10957000	0	800810	0	0	0	0	0	0	0	0	0	0
1220	Q1LXV4;Q1LXV5	>tr|Q1LXV4|Q1LXV4_DANRE Novel keratin family protein OS=Danio rerio GN=si:ch211-243g18.2 PE=2 SV=1		6	5	1	1	2	4	1	2	2	1	2	6	6	6	6	6	1	1	0	1	1	1	6	3	5				0	0	0	85920	0	0	0	0	0	506080	3176300	728750	1643100	1453200	0	0	0	0
1221	Q1LYB7	>tr|Q1LYB7|Q1LYB7_DANRE Ribosomal protein L13a OS=Danio rerio GN=rpl13a PE=2 SV=1		6	6	5	6	5	6	6	5	5	5	5	5	5	5	4	5	3	2	0	1	2	2	1	2	2				9437500	12650000	7392100	4171100	6641500	5164700	3719600	4619200	7953300	3339100	2324800	3224200	2027000	2513000	0	807490	0	0
1257	Q4VBU2;E9QDW1	>tr|Q4VBU2|Q4VBU2_DANRE Uncharacterized protein OS=Danio rerio GN=crygmxl2 PE=2 SV=1;>tr|E9QDW1|E9QDW1_DANRE Uncharacterized protein OS=Danio rerio GN=crygmxl2 PE=4 SV=1		6	6	6	6	4	0	0	0	0	1	0	0	0	0	0	1	0	0	0	0	0	0	0	0	0				99057000	172310000	32713000	0	0	0	0	0	0	0	0	0	0	0	0	0	0	0
1280	Q5BJJ2;F1QBR2	>tr|Q5BJJ2|Q5BJJ2_DANRE Ribosomal protein L3 OS=Danio rerio GN=rpl3 PE=2 SV=1;>tr|F1QBR2|F1QBR2_DANRE Uncharacterized protein (Fragment) OS=Danio rerio GN=rpl3 PE=3 SV=1		6	6	4	4	3	3	3	4	3	2	4	4	4	5	2	5	0	0	0	0	1	0	2	0	2				0	0	0	0	0	0	3416200	4133200	8664100	1279400	1432700	2339400	0	2066900	0	0	0	0
1314	Q5U369;F1QFI9	>tr|Q5U369|Q5U369_DANRE Annexin A3b OS=Danio rerio GN=anxa3b PE=2 SV=1;>tr|F1QFI9|F1QFI9_DANRE Uncharacterized protein OS=Danio rerio GN=anxa3b PE=3 SV=1		6	6	5	4	5	4	5	4	5	5	4	5	5	6	4	5	2	3	1	2	3	2	3	3	2				1868100	711690	2283000	939560	550580	578250	830560	2141600	1261500	381260	535830	1029000	377920	568630	682410	340580	0	112570
1355	Q6DGJ6	>tr|Q6DGJ6|Q6DGJ6_DANRE Peroxiredoxin 1 OS=Danio rerio GN=prdx2 PE=2 SV=1		6	4	5	5	5	5	6	5	5	6	5	5	5	6	6	6	2	1	1	1	4	2	4	3	2				1866400	2760800	1542600	1008100	525790	1497500	2456600	1707400	2033500	1540200	1483200	2033400	1154700	990800	1135500	0	0	0
1365	Q6DHL6	>tr|Q6DHL6|Q6DHL6_DANRE 40S ribosomal protein S6 OS=Danio rerio GN=RPS6 PE=2 SV=1		6	6	3	3	4	5	4	5	5	4	4	4	3	5	4	4	1	2	0	0	3	0	3	1	1				2379700	0	1129400	544900	946190	672910	2226300	4876900	6773500	2473300	1688900	1413400	1493400	1082200	0	0	0	0
1367	Q6DHS3	>tr|Q6DHS3|Q6DHS3_DANRE Ribosomal protein L15 OS=Danio rerio GN=rpl15 PE=2 SV=1		6	6	3	4	2	5	5	3	3	3	2	1	2	2	2	1	1	0	0	0	0	0	0	1	0				5846400	5321800	5643500	5449900	3403700	0	4079900	7002200	8285000	0	3045700	4085300	2458700	0	0	0	0	0
1372	Q6DRD1	>tr|Q6DRD1|Q6DRD1_DANRE ATP synthase oligomycin sensitivity conferral protein OS=Danio rerio GN=atp5o PE=2 SV=1		6	6	4	4	5	6	5	6	6	6	3	4	4	5	3	2	2	6	2	1	1	1	3	3	2				1693300	934320	1589600	4315600	2581200	5981300	908990	978010	1130600	519500	534290	720050	248020	238250	1170900	1483900	740880	0
38	Q6NW56;A2CE73	>tr|Q6NW56|Q6NW56_DANRE KH domain containing, RNA binding, signal transduction associated 1 OS=Danio rerio GN=khdrbs1a PE=2 SV=1;>tr|A2CE73|A2CE73_DANRE KH domain containing, RNA binding, signal transduction associated 1 OS=Danio rerio GN=khdrbs1a PE=4 SV=		6	6	4	5	4	5	4	4	3	3	3	3	3	3	2	2	0	2	1	2	2	2	2	2	2				26804000	7005700	6612200	14131000	3647200	3982600	1149600	1155000	889150	1180900	1416500	1199500	571230	939460	0	551110	0	262800
1426	Q6NYV1	>tr|Q6NYV1|Q6NYV1_DANRE Proteasome (Prosome, macropain) 26S subunit, non-ATPase, 3 OS=Danio rerio GN=psmd3 PE=2 SV=1		6	6	4	5	5	3	3	4	5	4	5	5	5	4	4	2	0	1	0	0	4	0	4	2	2				424100	643750	480490	290380	188110	172320	284990	997600	980890	184620	214620	660170	186370	216710	0	0	0	0
1431	Q6P0G6	>tr|Q6P0G6|Q6P0G6_DANRE Novel protein similar to vertebrate myosin, light chain 6, alkali, smooth muscle and non-muscle (MYL6, zgc:77231) OS=Danio rerio GN=DKEY-225D17.1 PE=2 SV=1		6	3	1	1	1	4	4	3	4	4	5	4	5	6	1	1	4	5	5	3	2	3	5	3	3				0	0	0	627610	0	0	3037400	3749100	4592600	1407900	2282200	2663800	0	0	2086400	14157000	9239500	0
1463	Q6PBP1;Q6P967	>tr|Q6PBP1|Q6PBP1_DANRE Guanine nucleotide binding protein (G protein), alpha activating activity polypeptide O OS=Danio rerio GN=gnao1a PE=2 SV=1		6	5	6	6	5	5	6	2	2	6	6	3	2	4	2	1	1	1	0	0	0	1	0	0	1				4463200	2533000	4725800	409050	763420	359760	0	539070	667770	223800	0	170190	0	0	0	0	0	0
1470	Q6PBZ1	>tr|Q6PBZ1|Q6PBZ1_DANRE Ribosomal protein L7a OS=Danio rerio GN=rpl7a PE=2 SV=1		6	6	6	6	6	5	4	5	6	6	5	5	5	5	6	5	2	2	1	1	4	4	4	4	5				6434200	9759400	7258900	3332900	5218100	2673700	10534000	14174000	17905000	8995800	6349600	8662000	4788000	5104800	1484400	847140	0	0
1485	Q6PFT0;A8KBR9	>tr|Q6PFT0|Q6PFT0_DANRE Uncharacterized protein OS=Danio rerio GN=zgc:64103 PE=2 SV=1;>tr|A8KBR9|A8KBR9_DANRE Uncharacterized protein OS=Danio rerio GN=zgc:64103 PE=2 SV=1		6	1	6	5	5	6	6	6	4	4	4	2	5	5	4	4	1	1	0	1	2	0	2	0	0				0	0	0	0	0	0	0	0	0	0	0	0	0	0	17576	0	0	0
1507	Q6TH32	>tr|Q6TH32|Q6TH32_DANRE Muscle cofilin 2 OS=Danio rerio GN=cfl1 PE=2 SV=1		6	6	1	0	1	1	1	3	4	4	4	5	5	6	5	3	1	4	3	1	5	4	4	2	4				0	0	0	0	0	286210	1068600	820290	495300	2532100	1537200	1397200	647210	735730	0	507300	422850	0
1523	Q7SXL4;E7EZL7	>tr|Q7SXL4|Q7SXL4_DANRE Nucleoside diphosphate kinase OS=Danio rerio GN=nme2b.2 PE=2 SV=1;>tr|E7EZL7|E7EZL7_DANRE Nucleoside diphosphate kinase OS=Danio rerio GN=nme2b.1 PE=3 SV=1		6	3	3	4	3	5	4	6	5	5	6	6	5	5	5	4	4	4	4	6	5	4	3	2	3				8095700	11535000	6335700	1720600	1838000	1409800	3194900	3985000	3440300	2486500	1767300	2750400	1380300	1849400	4913700	2687300	1132100	4545000
1576	Q7ZV39	>tr|Q7ZV39|Q7ZV39_DANRE Uncharacterized protein OS=Danio rerio GN=zgc:56235 PE=2 SV=1		6	3	6	5	6	6	6	6	5	5	5	4	4	5	5	4	5	4	3	3	2	2	3	3	4				5455400	8132500	6354000	3511000	3221800	833380	697710	962430	3625200	206140	400470	1165500	1643200	1996200	800230	806140	0	0
1579	Q7ZV96;E9QIR9	>tr|Q7ZV96|Q7ZV96_DANRE QM protein OS=Danio rerio GN=rpl10 PE=2 SV=1;>tr|E9QIR9|E9QIR9_DANRE Uncharacterized protein OS=Danio rerio GN=rpl10 PE=4 SV=1		6	6	2	2	1	4	4	3	5	6	6	4	3	5	3	4	0	0	0	0	2	1	1	1	1				0	0	0	741300	721350	660100	1538500	4897200	3681500	584220	762850	762060	471900	293600	0	0	0	0
1591	Q7ZZA3	>tr|Q7ZZA3|Q7ZZA3_DANRE FK506 binding protein 11 OS=Danio rerio GN=fkbp11 PE=2 SV=1		6	6	6	6	6	5	6	4	5	4	4	3	4	5	5	5	1	2	2	1	1	1	2	1	1				13755000	9553100	16900000	3233600	4869100	3329200	1948500	4775200	4663800	392200	374460	706540	841440	583350	0	90850	69485	0
1600	Q803J6;E9QBZ6	>tr|Q803J6|Q803J6_DANRE Syndecan binding protein OS=Danio rerio GN=sdcbp PE=2 SV=1;>tr|E9QBZ6|E9QBZ6_DANRE Uncharacterized protein OS=Danio rerio GN=sdcbp2 PE=4 SV=1		6	6	3	0	1	5	4	2	1	2	0	3	1	2	4	3	1	6	2	2	4	5	3	5	3				401870	0	0	229000	174570	449210	0	114740	0	0	0	0	320420	574780	0	233180	186110	0
1605	Q803T5	>tr|Q803T5|Q803T5_DANRE Adenosylhomocysteinase OS=Danio rerio GN=ahcy PE=2 SV=1		6	6	5	6	5	1	1	1	0	0	0	0	0	0	0	0	0	1	0	0	1	0	0	0	0				2835100	4495300	1064200	0	0	0	0	0	0	0	0	0	0	0	0	0	0	0
1619	Q8JGR8	>tr|Q8JGR8|Q8JGR8_DANRE Lysosome membrane protein II OS=Danio rerio GN=scarb2 PE=2 SV=1		6	6	5	5	5	6	5	4	1	2	2	3	2	4	3	3	1	0	1	0	1	2	1	1	0				4134300	3903400	4717900	5350900	7414900	3882400	0	523320	2521600	841140	629640	1214300	1074300	1619400	0	0	0	0
1667	Q9W6E0	>tr|Q9W6E0|Q9W6E0_DANRE Frizzled-related protein OS=Danio rerio GN=frzb PE=2 SV=1		6	6	1	1	2	3	1	1	4	4	4	3	4	4	4	4	4	2	3	4	1	3	0	3	3				0	0	1042200	995350	0	0	10262000	2726600	5429900	8533400	4276600	2524500	2401000	2592800	13094000	0	7625500	14543000
616	Q9W767;E9QIK2	>tr|Q9W767|Q9W767_DANRE Midkine-related growth factor OS=Danio rerio GN=mdka PE=2 SV=1;>tr|E9QIK2|E9QIK2_DANRE Uncharacterized protein OS=Danio rerio GN=mdka PE=4 SV=1		6	6	1	0	1	4	5	5	5	6	3	3	3	4	3	3	2	3	3	4	3	3	3	3	3				0	0	0	4115500	3674600	4335500	18047000	5805500	13810000	15923000	14061000	5381700	5478100	4552000	2366700	3188700	12015000	14301000
317	C7DZK3;F1QKL2	>sp|C7DZK3|CRA1A_DANRE Collagen alpha-1(XXVII) chain A OS=Danio rerio GN=col27a1a PE=2 SV=1;>tr|F1QKL2|F1QKL2_DANRE Uncharacterized protein (Fragment) OS=Danio rerio GN=col27a1a PE=4 SV=1		5	5	1	3	0	1	1	0	3	4	4	4	3	4	4	4	3	4	3	4	4	4	3	2	3				0	249920	0	0	0	0	419260	341160	502120	166840	230040	285900	1862100	2256200	670040	498250	775700	563460
1176	P79735	>sp|P79735|RAN_DANRE GTP-binding nuclear protein Ran OS=Danio rerio GN=ran PE=2 SV=1		5	5	4	4	3	2	3	0	2	4	4	1	0	2	2	0	0	0	0	0	0	0	0	0	0				1901100	5707000	4295900	587070	380600	0	0	639000	772860	0	0	0	513390	0	0	0	0	0
1252	Q4V8U5;F1RCH1;E7F1R6	>sp|Q4V8U5|ANO10_DANRE Anoctamin-10 OS=Danio rerio GN=ano10 PE=2 SV=1;>tr|F1RCH1|F1RCH1_DANRE Uncharacterized protein OS=Danio rerio GN=ANO10 PE=4 SV=1;>tr|E7F1R6|E7F1R6_DANRE Uncharacterized protein OS=Danio rerio GN=ANO10 PE=4 SV=1		5	5	4	4	4	3	2	3	1	5	5	1	2	2	3	1	0	0	0	0	0	0	2	1	1				251080	389850	300330	0	285230	0	0	374930	285920	0	149270	0	232970	0	0	0	0	0
1530	Q7SYC9;F1R8Y2;B0S5A7;F1QIF7	>sp|Q7SYC9|CTL2_DANRE Choline transporter-like protein 2 OS=Danio rerio GN=slc44a2 PE=2 SV=1		5	4	3	4	3	3	3	2	1	3	4	1	1	3	3	4	1	2	2	1	5	2	2	2	2				680390	544780	1354600	549250	770210	398000	0	675700	1071500	0	0	683460	2662700	2259700	0	606960	260930	0
1589	Q7ZWJ4	>sp|Q7ZWJ4|RL18A_DANRE 60S ribosomal protein L18a OS=Danio rerio GN=rpl18a PE=2 SV=1		5	5	4	5	5	5	4	5	4	5	5	5	4	5	5	5	2	1	0	1	1	0	1	1	0				7702700	7598100	7836400	4831800	9220100	3144700	5248600	10068000	10557000	2607600	3738200	6637900	2131200	2837700	0	0	0	0
1597	Q803F5	>sp|Q803F5|APMAP_DANRE Adipocyte plasma membrane-associated protein OS=Danio rerio GN=apmap PE=2 SV=1		5	5	4	4	4	4	4	5	2	4	3	0	2	0	1	0	0	1	1	0	2	0	3	2	0				2619500	646240	2198900	511680	727300	529160	166590	767690	658750	0	201820	0	0	0	0	0	0	0
1666	Q9W6A5;Q801U8;Q8AYM8;Q8AYM7;Q9W6A6	>sp|Q9W6A5|OPSG1_DANRE Green-sensitive opsin-1 OS=Danio rerio GN=opn1mw1 PE=1 SV=2;>tr|Q801U8|Q801U8_DANRE Opsin 1 (Cone pigments) medium-wave-sensitive 2 OS=Danio rerio GN=opn1mw2 PE=2 SV=1;>sp|Q8AYM8|OPSG2_DANRE Green-sensitive opsin-2 OS=Danio rerio GN=		5	5	5	4	5	1	1	0	1	2	1	1	1	1	0	1	1	0	0	0	1	0	0	0	0				43456000	47699000	57404000	0	0	0	0	290000	0	0	0	0	0	0	0	0	0	0
17	A2ARG7;A7YY99	>tr|A2ARG7|A2ARG7_DANRE Novel protein containing an ATP synthase E chain domain (Zgc:153661) OS=Danio rerio GN=atp5ib PE=4 SV=2		5	5	3	0	0	3	4	3	4	5	4	4	4	4	3	4	3	2	4	0	0	1	4	3	3				518250	0	0	3202900	2923300	2597200	5676800	2599100	3337300	1864300	1615700	1631200	917090	914730	1679400	1081500	766140	0
70	A4QN90;E7F225	>tr|A4QN90|A4QN90_DANRE Uncharacterized protein OS=Danio rerio GN=zgc:163061 PE=3 SV=1;>tr|E7F225|E7F225_DANRE Uncharacterized protein OS=Danio rerio GN=zgc:163061 PE=3 SV=1		5	4	3	4	3	3	5	4	5	5	3	5	4	3	4	3	3	1	0	0	0	1	0	0	1				1128100	1154600	737250	839980	1064700	1090000	2959500	1606900	2354400	2697400	2412200	1431100	1042000	546590	753840	0	0	0
89	A5WWG4;A5WWG5	>tr|A5WWG4|A5WWG4_DANRE Splicing factor, arginine/serine-rich 3 OS=Danio rerio GN=srsf3b PE=4 SV=1;>tr|A5WWG5|A5WWG5_DANRE Splicing factor, arginine/serine-rich 3 OS=Danio rerio GN=srsf3b PE=4 SV=1		5	2	2	1	1	2	2	3	5	5	5	5	4	5	5	5	1	3	2	1	2	1	2	2	2				379570	0	0	215110	288410	538320	4623400	2797300	6613200	2846900	1719000	1739100	1461400	2657100	0	306260	1287400	0
95	A6H8T4	>tr|A6H8T4|A6H8T4_DANRE Uncharacterized protein OS=Danio rerio GN=zgc:165618 PE=2 SV=1		5	5	4	2	3	4	3	2	4	4	4	4	5	4	3	3	1	2	3	2	1	3	1	1	3				1874700	0	630630	1611300	1454500	2391600	0	0	2069500	1340500	1230400	0	0	0	0	0	0	0
140	A8WIN7	>tr|A8WIN7|A8WIN7_DANRE Procollagen-lysine 1, 2-oxoglutarate 5-dioxygenase 1a OS=Danio rerio GN=plod1a PE=4 SV=1		5	5	2	1	2	2	2	3	2	2	4	4	2	3	2	2	1	3	1	4	3	4	2	1	2				0	0	156120	173440	463300	121270	223130	0	129240	227430	419230	316290	203190	376160	0	211550	0	625330
156	B0R0K9	>tr|B0R0K9|B0R0K9_DANRE Novel histone protein OS=Danio rerio GN=si:ch211-103n10.5 PE=3 SV=1		5	4	0	1	0	2	1	1	5	5	5	4	4	5	1	1	4	3	2	4	2	3	0	2	3				0	0	0	0	0	0	2266200	2637300	3889900	1444200	1356000	828480	0	0	2319200	1488900	484720	6465700
174	B0S5Q7;F1QYN7;Q8JFG6;F1QZP8	>tr|B0S5Q7|B0S5Q7_DANRE Myelin protein zero OS=Danio rerio GN=mpz PE=4 SV=1;>tr|F1QYN7|F1QYN7_DANRE Uncharacterized protein OS=Danio rerio GN=mpz PE=4 SV=1;>tr|Q8JFG6|Q8JFG6_DANRE Myelin protein zero OS=Danio rerio GN=mpz PE=2 SV=1;>tr|F1QZP8|F1QZP8_DANRE		5	5	0	1	1	0	0	0	2	2	2	3	2	3	0	0	5	5	5	4	5	4	4	4	3				0	0	0	0	0	0	0	2049100	2544300	3894500	0	2706700	0	0	67024000	36675000	5929100	11447000
175	B0S5W0	>tr|B0S5W0|B0S5W0_DANRE Novel protein similar to vertebrate collagen, type VIII, alpha 1 (COL8A1) OS=Danio rerio GN=col8a1a PE=4 SV=1		5	5	1	1	1	3	4	5	2	0	0	4	3	5	3	2	0	1	0	1	2	1	0	0	1				0	0	0	6628600	2951700	5924600	163460	0	0	1024900	1371400	2166900	825920	794170	0	0	0	0
178	B0S610;B0UXR9;B0UXS6;Q6PH56	>tr|B0S610|B0S610_DANRE Novel protein similar to heat shock cognate 70-kd protein OS=Danio rerio GN=hsp70l PE=3 SV=1;>tr|B0UXR9|B0UXR9_DANRE Novel protein similar to heat shock cognate 70-kd protein (Hsp70) OS=Danio rerio GN=mcm5 PE=3 SV=1;>tr|B0UXS6|B0UXS		5	1	3	3	3	2	2	1	3	4	3	4	5	5	4	4	2	2	1	3	4	3	4	4	2				0	0	0	0	0	0	0	0	0	0	0	0	0	0	0	0	0	0
182	B0S6C1;E7EXD1	>tr|B0S6C1|B0S6C1_DANRE Tissue factor pathway inhibitor a OS=Danio rerio GN=tfpia PE=4 SV=1;>tr|E7EXD1|E7EXD1_DANRE Uncharacterized protein OS=Danio rerio GN=OTTDARG00000020992 PE=4 SV=1		5	5	0	0	0	2	3	2	4	3	2	2	2	4	4	4	2	2	2	2	2	2	3	3	1				0	0	0	0	420950	255810	1533200	566320	418200	808430	818840	938600	6001400	6826600	740040	475990	0	0
207	B0UYP0;F1QPX2	>tr|B0UYP0|B0UYP0_DANRE Novel protein similar to vertebrate crystallin, gamma B family OS=Danio rerio GN=si:dkey-57a22.15 PE=4 SV=1;>tr|F1QPX2|F1QPX2_DANRE Uncharacterized protein (Fragment) OS=Danio rerio GN=crygm1 PE=4 SV=1		5	5	5	5	5	0	0	0	0	0	0	0	0	0	0	0	0	1	0	0	0	0	0	2	0				21734000	33728000	11872000	0	0	0	0	0	0	0	0	0	0	0	0	0	0	0
248	B7ZDA6	>tr|B7ZDA6|B7ZDA6_DANRE Novel protein similar to vertebrate laminin, beta 2 (Laminin S) (LAMB2) OS=Danio rerio GN=lamb2 PE=4 SV=1		5	4	1	1	1	5	5	5	0	2	1	4	4	3	0	0	3	1	1	2	4	3	1	1	0				0	0	0	1246700	810800	1056900	0	0	0	115060	123600	159220	0	0	164360	0	0	171990
256	B8A4C4	>tr|B8A4C4|B8A4C4_DANRE Novel protein (Zgc:158312) OS=Danio rerio GN=mogs PE=4 SV=1		5	5	5	5	5	5	4	3	3	5	4	1	3	0	0	1	0	0	0	0	0	0	0	1	0				2000600	2084100	1869700	412590	773150	383920	237400	505190	414410	0	220560	0	0	0	0	0	0	0
280	B8JHZ0	>tr|B8JHZ0|B8JHZ0_DANRE Novel protein OS=Danio rerio GN=scpp7 PE=2 SV=1		5	5	0	0	0	0	0	0	3	1	1	3	2	4	2	3	2	3	3	3	1	4	4	3	3				0	0	0	0	0	0	6383700	0	0	3385100	16198000	6777700	6399800	7467700	23966000	4127700	11164000	90228000
364	E7EYL3;F1R520;E9QIY1;F1QW86	>tr|E7EYL3|E7EYL3_DANRE Uncharacterized protein OS=Danio rerio GN=OTTDARG00000021336 PE=4 SV=1;>tr|F1R520|F1R520_DANRE Uncharacterized protein OS=Danio rerio GN=clstn1 PE=4 SV=1;>tr|E9QIY1|E9QIY1_DANRE Uncharacterized protein OS=Danio rerio GN=clstn1 PE=4		5	5	1	2	1	4	4	5	5	3	2	4	4	4	2	2	0	2	2	4	3	4	2	0	0				0	0	0	471670	456570	473280	448090	176780	0	868110	1096000	468180	323010	363750	0	242020	309460	344130
424	E7F475;F1QUG5;Q6PFQ2	>tr|E7F475|E7F475_DANRE Uncharacterized protein OS=Danio rerio GN=OTTDARG00000020486 PE=4 SV=1;>tr|F1QUG5|F1QUG5_DANRE Uncharacterized protein OS=Danio rerio GN=eif3c PE=4 SV=1;>sp|Q6PFQ2|EIF3C_DANRE Eukaryotic translation initiation factor 3 subunit C OS=		5	5	3	2	1	3	4	3	4	5	5	5	4	4	4	4	1	1	2	1	2	2	1	1	1				664290	883720	0	892490	850840	1051500	1800100	1056900	1015200	930430	865420	678070	943030	1042200	0	0	397710	0
467	E7F8F0;F1Q555;F1R2R0	>tr|E7F8F0|E7F8F0_DANRE Uncharacterized protein OS=Danio rerio GN=gpd2 PE=3 SV=1;>tr|F1Q555|F1Q555_DANRE Uncharacterized protein OS=Danio rerio GN=gpd2 PE=3 SV=1;>tr|F1R2R0|F1R2R0_DANRE Uncharacterized protein OS=Danio rerio GN=gpd2 PE=3 SV=1		5	5	1	2	2	4	4	5	1	2	2	0	1	3	1	0	1	1	1	0	1	0	2	1	1				0	0	0	434220	469390	272690	0	405570	393880	0	0	103560	0	0	0	0	0	0
518	E7FCN9	>tr|E7FCN9|E7FCN9_DANRE Uncharacterized protein OS=Danio rerio GN=cspg4 PE=4 SV=1		5	5	1	1	1	2	1	1	2	2	1	3	3	4	5	3	1	3	1	4	4	4	4	2	2				0	0	0	160640	0	0	0	0	0	151300	344790	209130	202670	276040	0	617580	0	829780
523	E7FCZ6	>tr|E7FCZ6|E7FCZ6_DANRE Uncharacterized protein OS=Danio rerio GN=ck2a2b PE=4 SV=1		5	2	4	4	4	4	4	5	2	2	2	0	0	0	1	0	0	0	0	0	1	0	0	0	0				5677400	6669100	3550900	2033900	2075700	2450900	348460	0	381650	0	0	0	0	0	0	0	0	0
537	E7FEA0;F1QXE5;Q8QFX6;E9QFR1;F1QXE1	>tr|E7FEA0|E7FEA0_DANRE Uncharacterized protein OS=Danio rerio GN=nrp1a PE=4 SV=1;>tr|F1QXE5|F1QXE5_DANRE Uncharacterized protein OS=Danio rerio GN=nrp1a PE=4 SV=1;>sp|Q8QFX6|NRP1A_DANRE Neuropilin-1a OS=Danio rerio GN=nrp1a PE=2 SV=1		5	5	3	4	4	0	0	0	1	1	0	1	2	1	5	5	0	0	0	0	2	0	3	3	3				175630	165770	208900	0	0	0	0	0	0	0	95666	0	2015200	2854800	0	0	0	0
551	E7FFZ8;F1R346;F1R1X3	>tr|E7FFZ8|E7FFZ8_DANRE Uncharacterized protein OS=Danio rerio GN=zgc:112374 PE=4 SV=1;>tr|F1R346|F1R346_DANRE Uncharacterized protein OS=Danio rerio GN=zgc:112374 PE=4 SV=1;>tr|F1R1X3|F1R1X3_DANRE Uncharacterized protein OS=Danio rerio GN=zgc:112374 PE=4		5	3	4	5	5	4	5	3	2	4	3	0	3	2	2	3	0	0	0	0	0	0	0	0	0				0	0	0	0	1089700	0	0	0	0	0	0	0	0	0	0	0	0	0
582	E9QDE7	>tr|E9QDE7|E9QDE7_DANRE Uncharacterized protein OS=Danio rerio GN=si:ch1073-139a18.1 PE=4 SV=1		5	5	0	0	0	0	0	0	2	2	3	0	1	0	1	1	5	4	2	1	2	0	4	4	3				0	0	0	0	0	0	0	0	0	0	0	0	0	0	611810	820240	277060	0
599	E9QG22	>tr|E9QG22|E9QG22_DANRE Uncharacterized protein OS=Danio rerio GN=si:dkey-1h24.4 PE=4 SV=1		5	5	1	0	1	2	1	2	5	4	4	5	5	5	5	5	5	4	5	5	5	5	3	5	4				0	0	0	95182	0	218660	1925500	1115000	1733400	8958000	8396500	6898500	7452800	7639600	9811600	23253000	12196000	26286000
603	E9QH31	>tr|E9QH31|E9QH31_DANRE Aldehyde dehydrogenase OS=Danio rerio GN=zgc:103715 PE=3 SV=1		5	5	5	4	4	5	5	5	2	4	3	1	2	3	0	2	1	1	1	0	0	0	0	1	0				3380900	1017900	1729600	2117600	4372700	502160	0	696770	940130	0	449920	557300	0	463800	0	0	0	0
607	E9QHD3;F1RAW4;F1QJ40	>tr|E9QHD3|E9QHD3_DANRE Uncharacterized protein OS=Danio rerio GN=thbs2a PE=4 SV=1;>tr|F1RAW4|F1RAW4_DANRE Uncharacterized protein (Fragment) OS=Danio rerio GN=BX663524.1 PE=4 SV=1;>tr|F1QJ40|F1QJ40_DANRE Uncharacterized protein (Fragment) OS=Danio rerio G		5	4	3	2	3	4	4	3	5	5	4	5	5	5	5	5	4	4	4	5	2	4	4	5	5				187740	0	176890	331090	247340	455470	429280	366730	233130	1103900	1065300	1835800	2533000	1905100	420440	1322000	391350	1985200
624	F1Q4N7	>tr|F1Q4N7|F1Q4N7_DANRE Uncharacterized protein OS=Danio rerio GN=anp32b PE=4 SV=1		5	2	4	3	4	5	5	5	5	4	4	4	4	4	5	4	3	2	1	3	4	3	3	3	3				0	0	0	407900	0	652420	262420	0	0	0	0	0	314170	0	0	0	0	0
303	F1Q5T7;B8JLR1;Q7SY03	>tr|F1Q5T7|F1Q5T7_DANRE Uncharacterized protein OS=Danio rerio GN=pdcd6ip PE=4 SV=1;>tr|B8JLR1|B8JLR1_DANRE Programmed cell death 6 interacting protein OS=Danio rerio GN=pdcd6ip PE=4 SV=1;>tr|Q7SY03|Q7SY03_DANRE Programmed cell death 6 interacting protein		5	5	1	2	3	3	3	2	3	2	2	4	3	5	5	5	1	1	1	2	3	3	4	3	2				0	535730	158770	121720	106440	102340	81983	202530	189940	127600	301970	254670	365400	335610	0	0	0	157520
202	F1Q726;B0UYH4	>tr|F1Q726|F1Q726_DANRE Uncharacterized protein OS=Danio rerio GN=si:dkey-31j12.4 PE=4 SV=1;>tr|B0UYH4|B0UYH4_DANRE Novel protein similar to vertebrate fibromodulin (FMOD) OS=Danio rerio GN=si:dkey-31j12.4 PE=4 SV=1		5	5	4	4	5	5	5	5	3	3	3	1	0	1	5	5	0	2	1	0	0	0	3	3	2				339070	373630	328540	5042100	3279300	6102400	249730	139720	222620	0	0	0	1707100	1704200	0	181230	0	0
440	F1Q8I0;E7F638	>tr|F1Q8I0|F1Q8I0_DANRE Uncharacterized protein (Fragment) OS=Danio rerio GN=msnb PE=4 SV=1;>tr|E7F638|E7F638_DANRE Uncharacterized protein OS=Danio rerio GN=msnb PE=4 SV=2		5	1	4	4	3	4	4	2	4	4	4	3	4	4	3	3	3	2	3	3	3	3	3	3	2				0	0	0	0	0	0	0	0	0	0	0	0	0	0	0	0	0	0
686	F1Q8J9;E7EXF5	>tr|F1Q8J9|F1Q8J9_DANRE Uncharacterized protein OS=Danio rerio GN=pkp3 PE=4 SV=1;>tr|E7EXF5|E7EXF5_DANRE Uncharacterized protein OS=Danio rerio GN=OTTDARG00000022457 PE=4 SV=2		5	4	0	0	0	0	1	0	3	0	1	3	3	3	1	0	0	2	0	0	3	3	1	0	1				0	0	0	0	0	0	0	0	0	99265	102350	136350	0	0	0	0	0	0
724	F1QC05;F1Q9M8	>tr|F1QC05|F1QC05_DANRE Uncharacterized protein OS=Danio rerio GN=ephx1 PE=4 SV=1		5	5	5	3	3	3	3	4	1	3	4	1	2	1	1	0	2	2	2	1	3	1	3	2	1				2130900	1070500	2031000	96934	359720	82040	0	115930	114990	0	19945	0	0	0	128330	204650	220470	0
733	F1QCD8;F1R8D5;E9QF28;E9QHU8	>tr|F1QCD8|F1QCD8_DANRE Uncharacterized protein OS=Danio rerio GN=hao2 PE=4 SV=1;>tr|F1R8D5|F1R8D5_DANRE Uncharacterized protein OS=Danio rerio GN=hao2 PE=4 SV=1		5	5	5	4	4	0	0	0	0	0	1	0	0	0	1	1	1	0	0	0	0	0	0	0	1				1081600	1993600	664460	0	0	0	0	0	0	0	0	0	0	0	0	0	0	0
737	F1QCG3;F1R0F1;F1RA88	>tr|F1QCG3|F1QCG3_DANRE Uncharacterized protein OS=Danio rerio GN=adam10a PE=4 SV=1;>tr|F1R0F1|F1R0F1_DANRE Uncharacterized protein (Fragment) OS=Danio rerio GN=adam10a PE=4 SV=1;>tr|F1RA88|F1RA88_DANRE Uncharacterized protein (Fragment) OS=Danio rerio GN=		5	3	3	3	2	4	5	4	3	4	3	2	3	3	2	3	2	2	2	1	3	1	1	1	2				4549000	3115100	2353700	6918200	4592500	4495700	8185100	9885200	3578900	0	8735600	8849500	12029000	2861800	4609600	3549800	18207000	0
746	F1QCU1;F1QDA6;B8JK22	>tr|F1QCU1|F1QCU1_DANRE Uncharacterized protein OS=Danio rerio GN=ACSL1 (2 of 2) PE=4 SV=1;>tr|F1QDA6|F1QDA6_DANRE Uncharacterized protein OS=Danio rerio GN=ACSL1 (2 of 2) PE=4 SV=1		5	5	1	0	3	3	5	5	2	4	4	1	2	1	2	0	2	2	1	2	1	1	2	2	0				0	0	0	211720	266660	97433	259440	456910	768380	0	178740	0	136400	0	358300	499840	0	198640
762	F1QEC9	>tr|F1QEC9|F1QEC9_DANRE Uncharacterized protein (Fragment) OS=Danio rerio GN=CABZ01079373.1 PE=4 SV=1		5	4	5	3	5	3	2	3	1	0	1	1	1	1	1	1	1	0	0	0	0	1	0	0	1				3106600	1035300	1386000	482210	0	545540	0	0	0	0	0	0	0	0	0	0	0	0
778	F1QF87;F1QKH5;F1QD66	>tr|F1QF87|F1QF87_DANRE Uncharacterized protein (Fragment) OS=Danio rerio GN=emilin3a PE=4 SV=1;>tr|F1QKH5|F1QKH5_DANRE Uncharacterized protein (Fragment) OS=Danio rerio GN=emilin3a PE=4 SV=1		5	5	5	3	3	5	4	3	3	1	0	3	3	4	1	2	1	2	0	0	0	0	1	0	0				154990	256760	254090	3292800	1544400	358110	103180	0	0	168890	154490	550400	0	133470	0	184740	0	0
785	F1QFQ6	>tr|F1QFQ6|F1QFQ6_DANRE Uncharacterized protein OS=Danio rerio GN=dlst PE=3 SV=1		5	5	3	3	3	5	5	5	3	2	2	2	2	3	1	1	1	1	1	1	0	1	1	0	1				1651900	1068800	1587400	4320300	6018700	3514100	368840	709160	1653600	301390	307190	246210	0	0	0	0	0	0
112	F1QGP6;A8E4Z6;F1R8R0;E7F8G1	>tr|F1QGP6|F1QGP6_DANRE Uncharacterized protein OS=Danio rerio GN=zgc:123103 PE=4 SV=1;>tr|A8E4Z6|A8E4Z6_DANRE Uncharacterized protein OS=Danio rerio GN=zgc:123103 PE=2 SV=1		5	5	0	1	0	4	4	4	4	3	1	4	5	4	3	5	1	1	1	3	0	4	2	1	1				0	0	0	2038200	257010	4960900	281340	0	0	225360	537230	400800	467500	378770	0	0	0	819130
833	F1QIS3;E7F4H1	>tr|F1QIS3|F1QIS3_DANRE Uncharacterized protein (Fragment) OS=Danio rerio GN=dysf PE=4 SV=1;>tr|E7F4H1|E7F4H1_DANRE Uncharacterized protein OS=Danio rerio GN=OTTDARG00000028660 PE=4 SV=1		5	5	0	0	1	5	5	5	2	3	2	1	2	2	1	2	2	3	1	1	2	1	2	1	1				0	0	0	357420	332540	313400	0	193340	0	0	0	0	0	0	0	349930	0	0
840	F1QJB3;REV__E7F5Y3	>tr|F1QJB3|F1QJB3_DANRE Uncharacterized protein (Fragment) OS=Danio rerio GN=CU469536.1 PE=3 SV=1		5	5	0	0	0	5	5	4	3	3	2	3	4	4	4	2	2	2	1	2	0	1	1	1	1				0	0	0	191860	81203	202810	124270	113360	0	122450	131810	146140	153320	0	143650	209430	0	324730
873	F1QLT3	>tr|F1QLT3|F1QLT3_DANRE Uncharacterized protein OS=Danio rerio GN=FGFBP2 (2 of 2) PE=4 SV=1		5	5	0	2	1	3	2	3	4	4	4	4	3	3	0	1	3	4	4	4	2	4	2	1	2				0	263690	0	394960	319420	281170	1926900	486950	893580	753280	803870	341930	0	0	1554300	4277300	2189100	3006500
877	F1QMJ9;Q6DH91	>tr|F1QMJ9|F1QMJ9_DANRE Histone H2B OS=Danio rerio GN=si:ch211-190p8.2 PE=3 SV=1;>tr|Q6DH91|Q6DH91_DANRE Histone H2B OS=Danio rerio GN=si:ch211-190p8.2 PE=2 SV=1		5	1	4	4	3	3	3	3	5	4	3	5	4	4	4	4	4	3	3	2	3	4	4	4	4				0	0	0	0	0	0	0	0	0	0	0	0	0	0	0	0	0	0
878	F1QMK5	>tr|F1QMK5|F1QMK5_DANRE Uncharacterized protein OS=Danio rerio GN=lamb1a PE=4 SV=1		5	4	2	0	0	5	5	5	0	2	1	1	1	0	1	0	0	1	1	0	1	1	0	0	0				378580	0	0	502510	595040	690790	0	252550	0	0	0	0	0	0	0	0	0	0
902	F1QQ00	>tr|F1QQ00|F1QQ00_DANRE Uncharacterized protein OS=Danio rerio GN=mgp PE=4 SV=1		5	5	0	0	0	2	3	2	1	1	0	3	3	3	2	2	2	1	2	5	4	5	5	3	5				0	0	0	382240	222050	1243500	0	0	0	1913700	5330100	2773800	1669000	1994900	2254100	0	901220	8504800
903	F1QQ39	>tr|F1QQ39|F1QQ39_DANRE Uncharacterized protein (Fragment) OS=Danio rerio GN=zgc:66286 PE=4 SV=1		5	4	0	1	0	5	5	5	3	3	3	4	3	4	3	2	4	4	3	0	1	0	4	4	3				0	0	0	348980	313840	818170	211910	271480	197500	70514	182240	166030	114930	264320	2343100	2556400	1303300	0
906	F1QQE4	>tr|F1QQE4|F1QQE4_DANRE Uncharacterized protein OS=Danio rerio GN=slit2 PE=4 SV=1		5	5	1	1	0	4	2	3	0	0	0	3	2	3	0	0	0	0	0	1	1	2	0	0	0				0	0	0	234620	154960	171490	0	0	0	0	0	0	0	0	0	0	0	0
913	F1QR23	>tr|F1QR23|F1QR23_DANRE Uncharacterized protein OS=Danio rerio GN=ssr1 PE=4 SV=1		5	5	5	5	5	5	5	5	5	5	4	4	5	4	5	4	3	4	3	3	2	3	3	3	3				7180400	5817100	13433000	7639100	7767200	5190800	3916200	5196500	4247600	1896000	1754700	3383800	1888100	1074100	100050	188960	179670	95449
825	F1QRK2;F1QI78;Q5TZG5	>tr|F1QRK2|F1QRK2_DANRE Uncharacterized protein (Fragment) OS=Danio rerio GN=ezr PE=4 SV=1;>tr|F1QI78|F1QI78_DANRE Uncharacterized protein (Fragment) OS=Danio rerio GN=ezr PE=4 SV=1;>tr|Q5TZG5|Q5TZG5_DANRE Ezrin OS=Danio rerio GN=ezr PE=2 SV=1		5	2	4	4	3	4	4	2	3	3	3	2	3	4	2	2	2	2	2	2	2	2	2	2	1				0	0	0	0	0	0	0	0	0	0	0	0	0	0	0	26503	0	0
919	F1QRQ2	>tr|F1QRQ2|F1QRQ2_DANRE Uncharacterized protein OS=Danio rerio GN=zgc:112355 PE=4 SV=1		5	5	1	3	2	0	0	0	5	4	3	2	0	0	1	0	0	0	1	0	0	0	0	0	0				0	347450	122490	0	0	0	1348900	221870	184250	163700	0	0	0	0	0	0	0	0
668	F1QSI9;F1Q7L6	>tr|F1QSI9|F1QSI9_DANRE Uncharacterized protein OS=Danio rerio GN=slc3a2 PE=4 SV=1;>tr|F1Q7L6|F1Q7L6_DANRE Uncharacterized protein OS=Danio rerio GN=slc3a2 PE=4 SV=1		5	5	1	1	1	5	5	3	0	0	0	1	0	3	0	0	0	0	0	0	0	0	0	1	0				0	0	0	916010	769880	811660	0	0	0	0	0	257490	0	0	0	0	0	0
943	F1QTQ2	>tr|F1QTQ2|F1QTQ2_DANRE Uncharacterized protein OS=Danio rerio GN=COL9A1 (1 of 2) PE=4 SV=1		5	5	5	4	5	5	5	4	5	4	5	5	5	5	4	2	5	3	3	5	4	4	2	2	5				106650000	107840000	67915000	46192000	92694000	57988000	410050000	518350000	382520000	59141000	80608000	26724000	22990000	28335000	30276000	34789000	170840000	4076000
898	F1QUI0;F1QPL4	>tr|F1QUI0|F1QUI0_DANRE Uncharacterized protein (Fragment) OS=Danio rerio GN=f7i PE=3 SV=1;>tr|F1QPL4|F1QPL4_DANRE Uncharacterized protein OS=Danio rerio GN=f7i PE=3 SV=1		5	5	2	2	2	4	3	4	1	1	2	3	2	1	3	2	2	2	4	1	2	2	2	1	2				0	2706600	0	4162600	4410300	7976200	0	0	0	1431400	0	0	4204300	10076000	0	0	2784200	0
826	F1QWM1;F1QIA1;F1QCX0;F1QMU6	>tr|F1QWM1|F1QWM1_DANRE Uncharacterized protein OS=Danio rerio GN=rgs9 PE=4 SV=1;>tr|F1QIA1|F1QIA1_DANRE Uncharacterized protein OS=Danio rerio GN=rgs9 PE=4 SV=1;>tr|F1QCX0|F1QCX0_DANRE Uncharacterized protein OS=Danio rerio GN=rgs9 PE=4 SV=1;>tr|F1QMU6|F1		5	5	5	3	3	0	1	1	1	1	1	1	0	1	1	1	0	0	0	1	0	1	0	1	0				2777100	2722300	4045800	0	0	0	0	0	0	0	0	0	0	0	0	0	0	0
976	F1QXB0	>tr|F1QXB0|F1QXB0_DANRE Uncharacterized protein OS=Danio rerio GN=BX276181.1 PE=4 SV=1		5	4	4	4	4	0	0	0	0	0	0	0	1	1	0	0	0	0	0	0	1	0	0	0	0				1834300	4045300	476380	0	0	0	0	0	0	0	0	0	0	0	0	0	0	0
978	F1QXC6	>tr|F1QXC6|F1QXC6_DANRE Uncharacterized protein (Fragment) OS=Danio rerio GN=BX323449.2 PE=3 SV=1		5	4	0	0	2	0	1	3	3	3	2	5	5	4	5	4	4	4	4	5	4	5	3	4	4				0	0	143550	0	0	139120	355010	266600	397180	654840	666900	579590	1847400	1404600	536310	314860	366740	1457700
1014	F1R1J9;F1QZ50	>tr|F1R1J9|F1R1J9_DANRE Uncharacterized protein OS=Danio rerio GN=ahnak PE=4 SV=1		5	5	0	0	0	1	0	0	2	2	0	2	4	4	2	1	0	0	0	2	2	1	2	1	2				0	0	0	0	0	0	0	0	0	0	508850	256700	0	0	0	0	0	0
1036	F1R334	>tr|F1R334|F1R334_DANRE Uncharacterized protein (Fragment) OS=Danio rerio GN=psmd2 PE=4 SV=1		5	5	2	3	3	1	1	1	3	2	4	2	3	3	2	1	2	1	0	0	1	1	2	0	0				302440	500390	426720	0	0	0	283640	604090	793870	205380	167170	246400	200030	0	213470	0	0	0
1043	F1R407	>tr|F1R407|F1R407_DANRE Uncharacterized protein OS=Danio rerio GN=FP016245.1 PE=4 SV=1		5	5	2	3	3	4	4	4	4	3	2	3	3	3	2	2	2	1	1	1	1	0	1	1	2				4138900	4403500	4190500	34046000	30577000	49045000	21190000	51520000	11104000	4551900	4523300	3361800	10797000	7497200	11249000	0	0	0
1047	F1R4C2	>tr|F1R4C2|F1R4C2_DANRE Uncharacterized protein OS=Danio rerio GN=si:busm1-57f23.1 PE=4 SV=1		5	5	0	0	0	1	1	2	5	5	5	5	5	5	4	5	4	4	4	4	3	4	3	4	4				0	0	0	0	0	700740	6112500	3707800	3866400	8301000	7638500	4993600	4609200	4470900	10725000	9326400	20100000	44432000
1069	F1R6B9;F1R6B8	>tr|F1R6B9|F1R6B9_DANRE Uncharacterized protein OS=Danio rerio GN=zgc:153154 PE=3 SV=1;>tr|F1R6B8|F1R6B8_DANRE Uncharacterized protein OS=Danio rerio GN=zgc:153154 PE=3 SV=1		5	3	0	0	1	0	0	1	2	0	1	1	3	2	2	2	4	3	3	3	5	4	2	3	4				0	0	0	0	0	0	0	0	0	0	0	0	0	0	0	1183400	0	1034400
1095	F1R8D7	>tr|F1R8D7|F1R8D7_DANRE Uncharacterized protein OS=Danio rerio GN=syncripl PE=4 SV=1		5	2	4	4	3	2	2	3	4	5	5	3	2	3	2	5	2	2	0	0	4	3	4	2	0				75498	0	0	0	0	0	0	112550	345710	0	0	0	0	58732	0	0	0	0
1109	F1R9A9	>tr|F1R9A9|F1R9A9_DANRE Uncharacterized protein OS=Danio rerio GN=serpinb1l4 PE=3 SV=1		5	1	1	1	0	1	1	1	2	2	1	2	1	1	1	0	1	2	1	2	5	1	4	2	2				0	0	0	0	0	0	0	0	0	0	0	0	0	0	0	0	0	0
1134	F1RBK0	>tr|F1RBK0|F1RBK0_DANRE Uncharacterized protein (Fragment) OS=Danio rerio GN=dkk1a PE=4 SV=1		5	5	0	0	0	0	0	0	0	0	0	0	0	0	0	0	4	3	3	4	4	4	2	2	3				0	0	0	0	0	0	0	0	0	0	0	0	0	0	4978600	5418100	4672700	20886000
1135	F1RBS6	>tr|F1RBS6|F1RBS6_DANRE Nucleoside diphosphate kinase OS=Danio rerio GN=nme2b.1 PE=3 SV=1		5	2	5	5	4	4	3	4	4	4	5	5	4	4	3	4	3	3	3	4	3	3	3	3	3				1623500	2506400	1360800	273950	0	0	651330	786080	551950	427000	429700	563030	0	363160	0	0	0	0
1140	F1RCR9;B8JHZ9;B8JHZ8	>tr|F1RCR9|F1RCR9_DANRE Uncharacterized protein OS=Danio rerio GN=si:dkey-234k24.1 PE=4 SV=1;>tr|B8JHZ9|B8JHZ9_DANRE Novel protein similar to H.sapiens CPZ, carboxypeptidase Z (CPZ) (Fragment) OS=Danio rerio GN=si:dkey-234k24.1 PE=4 SV=1		5	5	0	2	1	2	3	1	2	3	3	3	4	3	4	3	2	2	2	2	5	3	4	3	3				0	178760	0	192210	247450	0	210340	337710	197500	1022100	767720	742740	2148700	1883000	406600	444550	239120	514820
673	Q1LXU2;F1Q7T7	>tr|Q1LXU2|Q1LXU2_DANRE Procollagen, type IX, alpha 2 OS=Danio rerio GN=col9a2 PE=2 SV=1;>tr|F1Q7T7|F1Q7T7_DANRE Uncharacterized protein OS=Danio rerio GN=col9a2 PE=4 SV=1		5	5	4	4	4	5	5	4	4	4	4	4	4	3	4	4	5	3	3	2	2	3	2	3	4				34072000	68811000	35651000	57187000	100550000	48416000	174810000	177740000	227650000	28447000	36322000	48188000	33210000	25289000	36104000	56420000	41923000	19612000
1230	Q1RLX2	>tr|Q1RLX2|Q1RLX2_DANRE Timp2 protein OS=Danio rerio GN=timp2a PE=2 SV=1		5	4	1	0	1	3	3	2	5	3	2	5	5	3	3	4	4	1	1	3	5	4	1	1	2				0	0	0	0	0	0	2255000	0	0	2396400	1886800	2361000	0	0	1794600	0	0	3403800
1242	Q3B7R0;F1R377	>tr|Q3B7R0|Q3B7R0_DANRE Cytochrome c-1 OS=Danio rerio GN=cyc1 PE=2 SV=1		5	5	4	2	5	4	4	4	3	5	4	2	3	4	4	3	2	2	3	1	2	1	4	3	2				5948600	4019000	4791400	1462400	3422000	1616900	664280	3000100	3262200	263400	757950	773820	1225600	930450	890670	1178300	614320	0
1258	Q4VBU7	>tr|Q4VBU7|Q4VBU7_DANRE Cytochrome c oxidase subunit Vaa OS=Danio rerio GN=cox5aa PE=2 SV=1		5	2	5	5	5	5	3	3	3	4	4	4	4	4	5	4	5	3	2	3	1	2	5	3	3				1713300	1116900	2295400	5166800	3828800	1806000	2167200	4617800	2542400	1354700	1875200	3384500	1713900	1440100	5312600	1754500	633830	1017900
1333	Q66I16	>tr|Q66I16|Q66I16_DANRE Uncharacterized protein OS=Danio rerio GN=etfdh PE=2 SV=1		5	5	5	3	4	5	5	4	0	4	4	1	2	2	1	0	2	3	1	0	1	0	2	2	1				4267100	2902100	2107500	596640	1316600	619210	0	623990	1360600	0	0	0	0	0	0	0	0	0
1281	Q6DRM3;Q5BKV9	>tr|Q6DRM3|Q6DRM3_DANRE 60S ribosomal protein L9 OS=Danio rerio GN=rpl9 PE=2 SV=1;>tr|Q5BKV9|Q5BKV9_DANRE Rpl9 protein OS=Danio rerio GN=rpl9 PE=2 SV=1		5	5	3	1	1	3	1	3	3	3	2	3	4	4	3	3	0	1	1	1	2	2	1	1	2				0	0	0	532620	0	1104100	930550	1484600	847450	1522600	1156500	1085200	374720	613910	0	0	0	0
1381	Q6GQN9	>tr|Q6GQN9|Q6GQN9_DANRE Dehydrogenase/reductase (SDR family) member 1 OS=Danio rerio GN=dhrs1 PE=2 SV=1		5	5	4	3	3	3	3	2	2	3	4	1	2	2	0	1	1	2	0	0	1	1	2	2	1				918740	1548200	862070	1110200	3099700	948300	187750	334310	305870	0	138060	161950	0	0	0	127410	0	0
1385	Q6IQA7	>tr|Q6IQA7|Q6IQA7_DANRE Hm13 protein OS=Danio rerio GN=hm13 PE=2 SV=1		5	5	5	3	5	4	3	3	2	3	3	2	1	1	2	0	0	0	0	0	1	0	0	0	0				2982500	2257600	2807400	1021500	1054300	616320	709670	1181900	939350	266320	0	0	622250	0	0	0	0	0
1388	Q6IQI2	>tr|Q6IQI2|Q6IQI2_DANRE Lgals1l2 protein OS=Danio rerio GN=lgals2a PE=2 SV=1		5	5	0	1	0	1	1	1	2	2	1	4	4	5	3	3	0	1	0	1	2	2	4	1	2				0	0	0	0	0	0	66938	77552	0	1326900	933510	4334100	418910	257650	0	0	0	0
1407	Q6NWJ2	>tr|Q6NWJ2|Q6NWJ2_DANRE Signal peptidase complex subunit 3 homolog (S. cerevisiae) OS=Danio rerio GN=spcs3 PE=2 SV=1		5	5	5	4	4	3	4	3	2	4	4	1	2	2	1	3	0	1	0	0	1	0	2	1	0				1745600	1680200	746260	1749700	1413400	1855900	699780	421010	668570	0	307390	179090	0	146780	0	0	0	0
1415	Q6NXA5	>tr|Q6NXA5|Q6NXA5_DANRE Uncharacterized protein OS=Danio rerio GN=zgc:77556 PE=2 SV=1		5	3	3	5	4	3	4	3	3	5	4	2	4	3	2	2	0	0	0	0	0	0	0	1	0				3489800	2772000	4489200	1093500	967990	696180	703580	1200100	2062800	628490	388730	485420	0	0	0	0	0	0
1424	Q6NYT8;F1QXL0	>tr|Q6NYT8|Q6NYT8_DANRE Lysyl oxidase OS=Danio rerio GN=lox PE=2 SV=1;>tr|F1QXL0|F1QXL0_DANRE Uncharacterized protein OS=Danio rerio GN=lox PE=4 SV=1		5	5	0	0	0	1	1	4	3	3	3	3	3	4	3	3	3	4	3	3	4	4	3	3	4				0	0	0	0	0	308690	1699900	1027600	1090000	13646000	8891100	6875200	1707100	1711200	4438000	2959600	3408400	12418000
1531	Q7SYK7;F1QCD4	>tr|Q7SYK7|Q7SYK7_DANRE Aspartate aminotransferase OS=Danio rerio GN=got2a PE=2 SV=1		5	5	4	3	3	1	1	1	2	3	3	1	1	2	1	1	4	4	2	2	2	3	4	2	2				468020	888220	415100	0	0	0	168210	228670	425760	0	0	157060	0	0	1398400	1087400	263250	231630
1538	Q7T1B0	>tr|Q7T1B0|Q7T1B0_DANRE Embryonic globin beta e2 OS=Danio rerio GN=hbbe2 PE=2 SV=1		5	4	3	3	4	3	2	3	4	5	4	2	2	3	2	2	0	0	1	1	0	0	1	1	1				0	0	998620	759400	0	725170	1230200	3477200	2874500	0	0	0	0	0	0	0	0	0
23	Q7ZU59;A2BFY9;Q71PD7;A2BFY8	>tr|Q7ZU59|Q7ZU59_DANRE Histone H2A (Fragment) OS=Danio rerio GN=h2afvl PE=2 SV=1;>tr|A2BFY9|A2BFY9_DANRE Histone H2A OS=Danio rerio GN=h2afv PE=2 SV=1;>sp|Q71PD7|H2AV_DANRE Histone H2A.V OS=Danio rerio GN=h2afv PE=2 SV=3		5	4	2	3	3	3	2	2	5	5	5	5	5	4	3	4	1	3	1	1	2	1	2	1	2				0	0	1750800	721350	0	0	5789400	2419400	2398500	3174100	1797100	1491700	1378800	1090900	0	1520700	0	0
1572	Q7ZUM0	>tr|Q7ZUM0|Q7ZUM0_DANRE Tyrosine 3-monooxygenase/tryptophan 5-monooxygenase activation protein, theta polypeptide OS=Danio rerio GN=ywhaqa PE=2 SV=1		5	2	3	3	3	5	3	3	5	4	2	5	5	5	4	5	3	4	3	4	4	5	2	3	5				0	0	0	0	0	0	51554	0	0	77266	56461	60595	0	0	0	0	0	83754
1582	Q7ZVG7;F1RCB0	>tr|Q7ZVG7|Q7ZVG7_DANRE Fibrinogen, gamma polypeptide OS=Danio rerio GN=fgg PE=2 SV=1;>tr|F1RCB0|F1RCB0_DANRE Uncharacterized protein OS=Danio rerio GN=fgg PE=4 SV=1		5	5	1	1	0	5	3	4	5	5	5	1	3	3	1	0	2	4	1	1	3	2	4	4	1				0	0	0	665290	513790	674190	553310	577210	745490	0	366560	288910	0	0	0	378670	0	0
1607	Q803W0;A2AWA1;A2AWA0;Q8AW05;Q7SXU7	>tr|Q803W0|Q803W0_DANRE DEAD (Asp-Glu-Ala-Asp) box polypeptide 39b OS=Danio rerio GN=ddx39b PE=2 SV=1;>tr|A2AWA1|A2AWA1_DANRE DEAD (Asp-Glu-Ala-Asp) box polypeptide 39a OS=Danio rerio GN=ddx39a PE=4 SV=1;>tr|A2AWA0|A2AWA0_DANRE DEAD (Asp-Glu-Ala-Asp) box p		5	5	5	5	5	4	5	3	3	3	3	1	2	2	1	1	2	1	1	1	1	1	1	1	1				2605400	6377800	3686800	726750	684030	698540	562680	848000	554270	0	301200	310960	0	0	398900	0	0	0
1637	Q90Z34	>tr|Q90Z34|Q90Z34_DANRE ATPase, Na+/K+ transporting, beta 2b polypeptide OS=Danio rerio GN=atp1b2b PE=2 SV=1		5	4	5	5	5	0	0	0	0	0	0	0	0	0	0	0	0	0	1	0	0	0	0	0	0				7453200	3664100	6425200	0	0	0	0	0	0	0	0	0	0	0	0	0	0	0
591	Q9DGL2;F1QUM2;E9QEU4	>tr|Q9DGL2|Q9DGL2_DANRE ATPase, Na+/K+ transporting, beta 2a polypeptide OS=Danio rerio GN=atp1b2a PE=2 SV=1;>tr|F1QUM2|F1QUM2_DANRE Uncharacterized protein (Fragment) OS=Danio rerio GN=atp1b2a PE=3 SV=1;>tr|E9QEU4|E9QEU4_DANRE Uncharacterized protein OS=D		5	4	5	5	4	3	3	3	3	2	2	1	1	3	3	2	2	1	0	1	0	0	0	1	0				15230000	10640000	11711000	1043700	774480	429850	573200	2742100	1133200	0	0	256060	201580	180190	424970	0	0	0
1645	Q9I8U7;B8JKH7;B8JKH6	>tr|Q9I8U7|Q9I8U7_DANRE Fast skeletal muscle myosin light polypeptide 3 OS=Danio rerio GN=mylz3 PE=2 SV=1;>tr|B8JKH7|B8JKH7_DANRE Myosin, light polypeptide 3, skeletal muscle (Fragment) OS=Danio rerio GN=mylz3 PE=4 SV=1		5	3	0	0	0	4	4	4	3	3	3	4	4	5	1	1	2	3	2	1	1	1	3	1	2				0	0	0	373070	313910	623180	1216500	207100	377420	732010	525210	730300	0	0	0	0	0	0
335	CON__PO76014	>PO76014 SWISS-PROT:O76014|HA7_Keratin, type I cuticular HA7 (Hair keratin, type I HA7)		4	0	1	3	3	2	3	1	1	3	1	1	2	2	3	3	2	1	0	3	1	1	1	1	1			+	0	0	911020	0	0	0	0	0	0	0	0	0	0	0	0	0	0	0
11	A1IGX5	>sp|A1IGX5|FIBIN_DANRE Fin bud initiation factor OS=Danio rerio GN=fibin PE=2 SV=1		4	3	0	0	0	1	0	0	1	0	1	2	2	3	3	3	2	2	2	3	2	4	4	4	4				0	0	0	0	0	0	0	0	0	125130	0	100570	248270	237940	533770	186480	117800	650970
73	A5JV83	>sp|A5JV83|HSPBB_DANRE Heat shock protein beta-11 OS=Danio rerio GN=hspb11 PE=2 SV=2		4	4	0	0	0	1	1	0	2	1	0	4	4	4	2	2	2	2	1	2	2	3	3	3	3				0	0	0	0	0	0	328080	0	0	7667200	4116600	6124400	2914800	1551700	397540	371790	0	527770
1167	O42222	>sp|O42222|GDF8_DANRE Growth/differentiation factor 8 OS=Danio rerio GN=mstnb PE=2 SV=2		4	4	0	0	0	1	2	2	4	3	3	4	4	4	4	3	2	4	3	4	2	4	3	4	2				0	0	0	0	0	915250	2765200	2100800	2279300	3909700	3093300	2991200	3742800	3186600	0	0	2910200	2454800
1174	P62084	>sp|P62084|RS7_DANRE 40S ribosomal protein S7 OS=Danio rerio GN=rps7 PE=2 SV=1		4	4	2	1	1	4	2	3	4	3	2	3	3	2	2	2	1	0	0	0	3	2	1	0	1				990170	0	0	2902800	6329300	2578400	1350900	3126100	2207000	2748400	1939100	2461100	973820	1497300	0	0	0	0
1319	Q5U3U3;B0S7W8	>sp|Q5U3U3|CPT2_DANRE Carnitine O-palmitoyltransferase 2, mitochondrial OS=Danio rerio GN=cpt2 PE=2 SV=2;>tr|B0S7W8|B0S7W8_DANRE Carnitine palmitoyltransferase II (Fragment) OS=Danio rerio GN=cpt2 PE=3 SV=1		4	4	2	1	4	2	3	2	1	1	0	1	0	0	0	0	0	1	0	0	0	0	2	0	0				562530	0	817250	568640	953290	457490	0	0	0	0	0	0	0	0	0	0	0	0
1323	Q5XJ10;E9QIH5;E9QGA9;E9QCY9	>sp|Q5XJ10|G3P_DANRE Glyceraldehyde-3-phosphate dehydrogenase OS=Danio rerio GN=gapdh PE=2 SV=2;>tr|E9QIH5|E9QIH5_DANRE Glyceraldehyde-3-phosphate dehydrogenase OS=Danio rerio GN=gapdh PE=3 SV=1;>tr|E9QGA9|E9QGA9_DANRE Glyceraldehyde-3-phosphate dehydrogen		4	4	4	4	4	3	3	2	3	4	3	4	3	4	4	3	2	1	1	2	3	2	2	1	1				1441500	3101900	1396500	248110	203550	280780	1399900	864730	803950	884150	504310	2586100	327120	403230	930110	0	0	594720
1480	Q6PD83;Q803N9	>sp|Q6PD83|BZW1A_DANRE Basic leucine zipper and W2 domain-containing protein 1-A OS=Danio rerio GN=bzw1a PE=2 SV=1		4	4	1	2	2	3	2	3	0	1	0	0	0	0	1	1	1	3	2	1	3	2	4	3	3				0	0	0	74762	0	219610	0	0	0	0	0	0	0	0	0	0	0	0
1496	Q6PI52	>sp|Q6PI52|CALM_DANRE Calmodulin OS=Danio rerio GN=calm1a PE=2 SV=3		4	4	1	1	1	1	1	1	2	1	1	1	3	3	2	2	1	2	3	3	2	2	2	2	2				0	0	0	0	0	0	1543900	0	0	0	2105500	1794000	714780	601190	0	957970	885400	2143200
1503	Q6TEN1;Q6IQP4;E7FBI4	>sp|Q6TEN1|RAP1B_DANRE Ras-related protein Rap-1b OS=Danio rerio GN=rap1b PE=2 SV=1;>tr|Q6IQP4|Q6IQP4_DANRE RAP1A, member of RAS oncogene family OS=Danio rerio GN=rap1a PE=2 SV=1		4	4	2	2	2	3	3	2	1	2	2	0	1	1	0	1	0	0	1	0	0	1	1	1	0				484390	0	762750	555820	146740	349930	0	49578	32283	0	0	0	0	0	0	0	0	0
1548	Q7T326	>sp|Q7T326|CISD2_DANRE CDGSH iron-sulfur domain-containing protein 2 OS=Danio rerio GN=cisd2 PE=2 SV=1		4	4	4	4	4	3	3	3	1	3	4	0	1	1	0	0	0	0	0	0	0	0	2	0	0				1359500	1505100	888330	234030	282620	139700	0	231800	283590	0	0	0	0	0	0	0	0	0
1634	Q90YL4;Q90ZM2	>sp|Q90YL4|S61A2_DANRE Protein transport protein Sec61 subunit alpha-like 2 OS=Danio rerio GN=sec61al2 PE=2 SV=3;>sp|Q90ZM2|S61A1_DANRE Protein transport protein Sec61 subunit alpha-like 1 OS=Danio rerio GN=sec61al1 PE=2 SV=3		4	4	3	4	4	3	3	2	4	3	3	2	4	2	2	3	0	0	0	1	1	0	0	0	0				5023600	34363000	38984000	1200800	1908800	958820	1006900	2362500	3408900	973050	712500	1142600	1283200	890330	0	0	0	0
1636	Q90Z10	>sp|Q90Z10|RL13_DANRE 60S ribosomal protein L13 OS=Danio rerio GN=rpl13 PE=2 SV=3		4	4	2	3	3	2	2	2	2	3	3	3	3	2	4	3	3	0	0	0	0	1	1	1	3				2512400	2053700	2203300	1386400	1649600	735670	2557300	4596600	3899700	4984800	3643100	1990300	1145500	1264300	977750	0	0	0
1656	Q9MIY7	>sp|Q9MIY7|COX2_DANRE Cytochrome c oxidase subunit 2 OS=Danio rerio GN=mt-co2 PE=3 SV=1		4	4	4	3	3	4	4	4	4	4	4	2	2	3	3	3	2	2	3	1	3	2	3	2	3				21194000	9359600	7834800	1028100	873480	2937100	725490	7510200	3044600	1354100	1657800	2633700	3112600	1716500	1861900	1604200	1095700	0
1615	Q9W6A7;Q8AYN0	>sp|Q9W6A7|OPSR1_DANRE Red-sensitive opsin-1 OS=Danio rerio GN=opn1lw1 PE=1 SV=1;>sp|Q8AYN0|OPSR2_DANRE Red-sensitive opsin-2 OS=Danio rerio GN=opn1lw2 PE=1 SV=1		4	4	4	4	4	0	0	0	0	1	2	0	0	0	0	1	0	0	0	0	0	0	0	0	0				81602000	46439000	131150000	0	0	0	0	0	255320	0	0	0	0	0	0	0	0	0
22	A2BFQ0;F1QSL9;F1Q508;F1QG00	>tr|A2BFQ0|A2BFQ0_DANRE Guanylate cyclase OS=Danio rerio GN=gc3 PE=3 SV=1;>tr|F1QSL9|F1QSL9_DANRE Guanylate cyclase OS=Danio rerio GN=gc3 PE=3 SV=1		4	4	3	3	3	0	1	0	0	1	0	0	0	0	0	0	0	0	0	0	1	0	0	0	0				2485100	2805500	3744200	0	0	0	0	0	0	0	0	0	0	0	0	0	0	0
26	A2BGR9;A5WWE7;F2Z4R7;F1QZU7	>tr|A2BGR9|A2BGR9_DANRE Novel protein similar to aldehyde dehydrogenase 2, like (Aldh2l) OS=Danio rerio GN=aldh2a PE=3 SV=1;>tr|A5WWE7|A5WWE7_DANRE Aldehyde dehydrogenase 2, like OS=Danio rerio GN=aldh2l PE=3 SV=1;>tr|F2Z4R7|F2Z4R7_DANRE Uncharacterized pr		4	4	1	1	0	2	2	1	1	3	2	3	1	3	1	1	0	1	2	0	1	0	2	1	0				0	0	0	275400	261220	0	0	425690	337330	175470	0	165890	0	0	0	0	0	0
45	A2RRT1	>tr|A2RRT1|A2RRT1_DANRE Milk fat globule-EGF factor 8 protein OS=Danio rerio GN=mfge8b PE=2 SV=1		4	4	0	2	0	1	2	1	1	1	1	0	1	1	1	1	3	3	2	2	3	1	4	3	3				0	127560	0	0	115090	0	0	0	0	0	0	0	0	0	136890	245900	216560	277770
49	A3KNP6	>tr|A3KNP6|A3KNP6_DANRE Secreted frizzled-related protein 1b OS=Danio rerio GN=sfrp1b PE=2 SV=1		4	4	0	0	1	0	0	1	3	2	2	3	3	2	3	3	1	2	2	3	4	3	3	2	2				0	0	0	0	0	0	775630	710640	501290	756010	1245100	775620	454910	764920	0	946220	1036300	483480
94	A6H8Q3;A8KBU7	>tr|A6H8Q3|A6H8Q3_DANRE Uncharacterized protein OS=Danio rerio GN=MYBPHL PE=2 SV=1;>tr|A8KBU7|A8KBU7_DANRE Uncharacterized protein OS=Danio rerio GN=MYBPHL PE=2 SV=1		4	4	1	0	0	4	3	3	1	1	2	2	2	3	2	1	0	1	0	0	1	0	0	1	0				0	0	0	1020300	1179300	1523400	0	0	857840	640380	1036200	1628400	229020	0	0	0	0	0
104	A7MCK2;Q6QA33;Q6P3L6	>tr|A7MCK2|A7MCK2_DANRE Hsd17b12b protein OS=Danio rerio GN=hsd17b12b PE=2 SV=1;>sp|Q6QA33|DH12B_DANRE Estradiol 17-beta-dehydrogenase 12-B OS=Danio rerio GN=hsd17b12b PE=2 SV=2;>sp|Q6P3L6|DH12A_DANRE Estradiol 17-beta-dehydrogenase 12-A OS=Danio rerio GN=		4	4	4	4	3	4	4	3	3	4	3	0	2	4	3	2	2	2	0	0	1	0	2	2	0				1865300	1987500	2158800	1128100	1428200	636860	271560	1295100	586040	0	300090	295620	161190	258340	223120	166670	0	0
122	A8E7C9	>tr|A8E7C9|A8E7C9_DANRE Novel protein similar to vertebrate SEC23 interacting protein (SEC23IP) OS=Danio rerio GN=sec23ip PE=4 SV=1		4	4	4	3	1	2	3	4	0	1	0	0	0	0	0	0	0	0	0	0	0	0	0	0	0				862160	515490	0	483600	404460	286940	0	0	0	0	0	0	0	0	0	0	0	0
128	A8E7N3;Q6NUW5	>tr|A8E7N3|A8E7N3_DANRE Acidic (Leucine-rich) nuclear phosphoprotein 32 family, member E OS=Danio rerio GN=anp32e PE=4 SV=1;>sp|Q6NUW5|AN32E_DANRE Acidic leucine-rich nuclear phosphoprotein 32 family member E OS=Danio rerio GN=anp32e PE=1 SV=1		4	4	2	1	1	4	3	4	3	2	2	4	4	4	4	4	3	4	4	4	4	4	4	4	4				181300	0	0	863330	473040	996980	709020	422400	295460	799580	455950	727540	828220	441900	418240	826560	1434900	1676300
130	A8KBB6	>tr|A8KBB6|A8KBB6_DANRE Novel protein similar to crystallin, gamma family OS=Danio rerio GN=crygm2f PE=2 SV=1		4	1	4	4	3	1	0	0	0	1	0	0	0	0	0	0	0	0	0	0	0	0	0	0	0				0	0	168310	0	0	0	0	0	0	0	0	0	0	0	0	0	0	0
131	A8KBJ5;Q4QRF4;Q6PI20;Q803H4	>tr|A8KBJ5|A8KBJ5_DANRE Histone H3 OS=Danio rerio GN=zgc:173552 PE=2 SV=1;>sp|Q4QRF4|H32_DANRE Histone H3.2 OS=Danio rerio GN=zgc:113984 PE=2 SV=3;>sp|Q6PI20|H33_DANRE Histone H3.3 OS=Danio rerio GN=h3f3a PE=2 SV=3		4	4	3	3	3	2	2	3	3	2	4	3	3	3	3	3	3	3	3	3	3	3	3	3	3				26773000	57490000	70844000	0	0	12391000	172020000	193760000	185040000	157300000	88668000	98429000	71827000	68400000	121080000	86468000	48374000	141270000
147	A9JRX1	>tr|A9JRX1|A9JRX1_DANRE Uncharacterized protein OS=Danio rerio GN=and2 PE=2 SV=1		4	4	1	0	0	2	3	3	0	0	0	0	0	0	4	4	0	0	0	0	0	0	1	0	1				0	0	0	767700	592450	1108000	0	0	0	0	0	0	1888700	2036500	0	0	0	0
148	A9LDD9;F1RAF9	>tr|A9LDD9|A9LDD9_DANRE Mitochondrial serine hydroxymethyltransferase OS=Danio rerio GN=shmt2 PE=2 SV=1;>tr|F1RAF9|F1RAF9_DANRE Uncharacterized protein (Fragment) OS=Danio rerio GN=shmt2 PE=3 SV=1		4	4	4	4	4	1	2	2	2	4	2	0	1	1	1	0	0	0	0	0	0	0	0	0	0				993080	807240	977520	0	303780	0	0	284220	0	0	0	0	0	0	0	0	0	0
149	B0BLX4	>tr|B0BLX4|B0BLX4_DANRE Zgc:175088 protein OS=Danio rerio GN=zgc:175088 PE=2 SV=1		4	4	1	1	1	4	4	3	0	0	0	0	1	0	1	0	1	0	1	0	1	0	0	0	0				0	0	0	2861900	3735300	4649400	0	0	0	0	0	0	0	0	0	0	0	0
188	B0S6P4;Q6P0V6;B0S6P5	>tr|B0S6P4|B0S6P4_DANRE Ribosomal protein L8 OS=Danio rerio GN=rpl8 PE=3 SV=1;>sp|Q6P0V6|RL8_DANRE 60S ribosomal protein L8 OS=Danio rerio GN=rpl8 PE=2 SV=3;>tr|B0S6P5|B0S6P5_DANRE Ribosomal protein L8 (Fragment) OS=Danio rerio GN=rpl8 PE=4 SV=1		4	4	3	2	2	2	1	4	2	4	4	2	4	4	3	2	1	1	0	0	1	1	1	0	1				4036200	4345200	8674100	0	0	3950500	8738700	6244900	6439400	6072700	6205500	3868000	1981300	2222800	0	0	0	0
189	B0S6P6;F1RCB2	>tr|B0S6P6|B0S6P6_DANRE DEAD (Asp-Glu-Ala-Asp) box polypeptide 3 OS=Danio rerio GN=ddx3 PE=3 SV=1;>tr|F1RCB2|F1RCB2_DANRE Uncharacterized protein OS=Danio rerio GN=pl10 PE=3 SV=1		4	3	2	1	3	1	1	1	2	2	2	1	1	2	1	1	0	0	0	0	1	0	0	0	0				0	0	226530	0	0	0	135480	229240	179000	0	0	0	0	0	0	0	0	0
197	B0UXN0	>tr|B0UXN0|B0UXN0_DANRE Novel protein similar to vertebrate quiescin Q6 sulfhydryl oxidase 1 (QSOX1) OS=Danio rerio GN=si:dkey-39n1.2 PE=4 SV=1		4	4	1	0	0	0	0	0	0	0	0	3	2	3	0	1	0	1	0	3	4	4	2	1	3				0	0	0	0	0	0	0	0	0	71054	190080	63076	0	0	0	0	0	1328800
215	B2GTW6;Q7ZVY5	>tr|B2GTW6|B2GTW6_DANRE Citrate synthase OS=Danio rerio GN=cs PE=2 SV=1;>sp|Q7ZVY5|CISY_DANRE Citrate synthase, mitochondrial OS=Danio rerio GN=cs PE=2 SV=1		4	4	3	4	2	0	2	0	0	2	2	0	0	1	0	0	1	0	0	0	1	1	0	0	0				1135600	1345000	1287100	0	0	0	0	309210	277580	0	0	0	0	0	0	0	0	0
246	B7ZD34;Q642J7;B7ZD32	>tr|B7ZD34|B7ZD34_DANRE 40S ribosomal protein S24 OS=Danio rerio GN=rps24 PE=3 SV=1;>tr|Q642J7|Q642J7_DANRE 40S ribosomal protein S24 OS=Danio rerio GN=rps24 PE=2 SV=1;>tr|B7ZD32|B7ZD32_DANRE 40S ribosomal protein S24 OS=Danio rerio GN=rps24 PE=3 SV=1		4	4	2	2	1	3	4	3	4	3	2	3	3	3	1	1	0	1	0	0	1	2	2	1	1				411990	375880	0	558540	585940	1125700	502980	626110	582770	823880	400550	1246700	0	0	0	0	0	0
276	B8A635	>tr|B8A635|B8A635_DANRE Novel protein (Fragment) OS=Danio rerio GN=si:dkey-9i23.11 PE=4 SV=1		4	4	3	3	3	3	3	3	1	3	3	0	1	1	1	1	0	0	0	0	0	0	0	0	0				1296300	1090100	964520	253110	944120	359850	0	470540	469350	0	0	0	0	0	0	0	0	0
288	B8JKN6;B8JKN7	>tr|B8JKN6|B8JKN6_DANRE Peptidyl-prolyl cis-trans isomerase OS=Danio rerio GN=ppia PE=3 SV=1;>tr|B8JKN7|B8JKN7_DANRE Peptidylprolyl isomerase A (Cyclophilin A) OS=Danio rerio GN=ppia PE=3 SV=1		4	4	4	4	4	0	0	1	1	2	1	2	1	2	0	2	1	1	0	1	1	0	1	1	0				1704900	5416400	2767500	0	0	0	0	910190	0	0	0	0	0	0	0	0	0	0
291	B8JKU0;B8JKT9	>tr|B8JKU0|B8JKU0_DANRE Novel protein similar to vertebrate farnesyl-diphosphate farnesyltransferase 1 (FDFT1) OS=Danio rerio GN=si:ch73-107c13.2 PE=4 SV=1		4	4	4	4	4	4	4	4	0	2	2	0	1	1	0	0	0	0	0	0	0	1	0	0	0				782360	747040	736330	276780	234190	210060	0	0	0	0	0	0	0	0	0	0	0	0
356	E7EXW8;F1QKF9	>tr|E7EXW8|E7EXW8_DANRE Uncharacterized protein OS=Danio rerio GN=CU207301.4 PE=4 SV=1;>tr|F1QKF9|F1QKF9_DANRE Uncharacterized protein (Fragment) OS=Danio rerio GN=CABZ01077236.1 PE=4 SV=1		4	4	1	1	2	2	2	2	0	0	1	0	1	0	0	0	0	0	0	0	0	0	0	0	0				0	0	0	0	0	0	0	0	39018	0	0	0	0	0	0	0	0	0
366	E7EYM4	>tr|E7EYM4|E7EYM4_DANRE Uncharacterized protein OS=Danio rerio GN=BX324146.1 PE=4 SV=1		4	4	0	0	0	3	2	3	2	1	1	4	3	4	3	3	2	3	1	4	3	4	3	2	2				0	0	0	128400	60184	127760	92520	0	0	1301600	240350	1844000	430150	271100	147090	309640	0	3263700
399	E7F235;E7F3L8	>tr|E7F235|E7F235_DANRE Uncharacterized protein OS=Danio rerio GN=CABZ01044085.1 PE=4 SV=1;>tr|E7F3L8|E7F3L8_DANRE Uncharacterized protein OS=Danio rerio GN=CABZ01044085.1 PE=4 SV=1		4	3	1	0	1	3	3	3	0	0	0	0	1	1	0	0	0	0	0	0	0	0	1	0	0				0	0	0	496000	256650	416760	0	0	0	0	0	0	0	0	0	0	0	0
401	E7F253	>tr|E7F253|E7F253_DANRE Uncharacterized protein OS=Danio rerio GN=CABZ01079192.1 PE=4 SV=1		4	4	2	4	2	4	4	4	3	2	3	0	0	1	0	0	0	0	0	0	1	0	0	0	0				252430	223780	481520	815470	619130	382710	191320	220690	190220	0	0	0	0	0	0	0	0	0
403	E7F2E9	>tr|E7F2E9|E7F2E9_DANRE Uncharacterized protein OS=Danio rerio GN=CU927919.1 PE=4 SV=1		4	4	3	4	4	0	0	0	0	0	0	0	0	0	0	0	0	0	0	0	0	0	0	0	0				3366600	3805700	3039400	0	0	0	0	0	0	0	0	0	0	0	0	0	0	0
410	E7F301;F1Q9R2;F1Q658;F1QPS6	>tr|E7F301|E7F301_DANRE Uncharacterized protein OS=Danio rerio GN=OTTDARG00000021159 PE=3 SV=2;>tr|F1Q9R2|F1Q9R2_DANRE Uncharacterized protein OS=Danio rerio GN=f9 PE=3 SV=1;>tr|F1Q658|F1Q658_DANRE Uncharacterized protein OS=Danio rerio GN=f9 PE=3 SV=1;>tr		4	4	0	0	0	0	0	0	0	0	0	2	0	1	1	0	3	3	3	2	3	2	3	4	3				0	0	0	0	0	0	0	0	0	0	0	0	0	0	244770	738660	876680	362720
72	E7F5E9;A5A4L9	>tr|E7F5E9|E7F5E9_DANRE Uncharacterized protein OS=Danio rerio GN=supt16h PE=4 SV=1;>tr|A5A4L9|A5A4L9_DANRE FACT complex large subunit OS=Danio rerio GN=supt16h PE=2 SV=1		4	4	3	3	3	4	4	4	2	3	2	2	2	0	1	0	0	0	0	0	0	0	0	0	0				817390	1065100	702290	348240	377880	246280	0	0	331420	0	0	0	0	0	0	0	0	0
437	E7F5R7;A5PF48	>tr|E7F5R7|E7F5R7_DANRE Uncharacterized protein OS=Danio rerio GN=myo1c PE=4 SV=1		4	4	1	1	1	3	3	3	3	3	3	3	4	4	3	2	3	2	0	2	4	3	2	1	2				0	0	0	199240	181910	155410	117200	231260	218590	262040	655020	851870	195750	122900	145110	210650	0	92448
439	E7F5V5	>tr|E7F5V5|E7F5V5_DANRE Uncharacterized protein OS=Danio rerio GN=and1 PE=4 SV=1		4	4	1	0	1	3	3	3	0	1	0	0	1	1	4	4	0	0	0	0	0	0	1	1	1				0	0	0	711430	683530	2272400	0	0	0	0	0	0	4515800	6090900	0	0	0	0
502	E7FBB8;F1QIU3;Q1MTC0	>tr|E7FBB8|E7FBB8_DANRE Uncharacterized protein OS=Danio rerio GN=BX321884.1 PE=4 SV=1		4	2	2	1	1	0	1	2	4	3	2	3	3	3	3	4	2	2	3	2	3	2	4	2	4				390690	0	0	0	0	76228	122770	190110	143620	227930	77485	200490	986350	892730	259810	139860	480550	312480
515	E7FCI2;F1Q4M5;Q5TZ78;E7FBH5;Q98T96;F1QUJ7	>tr|E7FCI2|E7FCI2_DANRE Uncharacterized protein OS=Danio rerio GN=cyp2ad3 PE=3 SV=1;>tr|F1Q4M5|F1Q4M5_DANRE Uncharacterized protein OS=Danio rerio GN=OTTDARG00000005505 PE=3 SV=1;>tr|Q5TZ78|Q5TZ78_DANRE Cytochrome P450, family 2, subfamily J, polypeptide 2		4	4	3	3	3	4	4	3	2	3	3	0	2	2	0	0	0	1	0	0	0	0	1	0	0				887900	865440	767290	590770	1182500	683920	174380	492660	399880	0	112130	207500	0	0	0	0	0	0
521	E7FCV2;F1R0S4	>tr|E7FCV2|E7FCV2_DANRE Uncharacterized protein OS=Danio rerio GN=CU929313.1 PE=4 SV=1;>tr|F1R0S4|F1R0S4_DANRE Uncharacterized protein (Fragment) OS=Danio rerio GN=CU929313.1 PE=4 SV=1		4	4	0	0	0	3	2	4	1	0	0	2	1	1	2	1	2	2	2	1	1	1	2	2	1				0	0	0	233090	220440	211360	0	0	0	0	0	0	0	0	0	0	0	0
547	E7FFF7;F1QNA5;A8DZG2;Q802Y1;F1QNQ3	>tr|E7FFF7|E7FFF7_DANRE Uncharacterized protein OS=Danio rerio GN=srsf6a PE=4 SV=1;>tr|F1QNA5|F1QNA5_DANRE Uncharacterized protein OS=Danio rerio GN=srsf6a PE=4 SV=1;>tr|A8DZG2|A8DZG2_DANRE Splicing factor, arginine/serine-rich 6 OS=Danio rerio GN=sfrs6 PE		4	2	1	1	0	1	1	1	3	3	4	4	3	3	3	3	1	1	1	1	1	1	2	1	2				0	0	0	0	0	0	0	0	0	309230	0	0	0	0	0	0	0	0
593	E9QF62;F1QES7	>tr|E9QF62|E9QF62_DANRE Uncharacterized protein OS=Danio rerio GN=si:ch211-147j13.2 PE=4 SV=1;>tr|F1QES7|F1QES7_DANRE Uncharacterized protein (Fragment) OS=Danio rerio GN=si:ch211-147j13.2 PE=4 SV=1		4	4	0	0	0	2	0	2	1	3	0	0	1	1	4	2	0	0	0	0	0	0	2	0	1				0	0	0	0	0	188420	0	93356	0	0	0	0	167690	229000	0	0	0	0
600	E9QG66	>tr|E9QG66|E9QG66_DANRE Uncharacterized protein OS=Danio rerio GN=si:dkey-7c22.1 PE=4 SV=1		4	4	2	2	3	3	3	3	2	2	3	1	1	2	1	1	0	0	0	0	0	0	0	0	0				0	0	415500	0	154240	0	174870	265740	463910	0	0	0	0	0	0	0	0	0
610	E9QHH0;Q6PBW7	>tr|E9QHH0|E9QHH0_DANRE Uncharacterized protein OS=Danio rerio GN=rps19 PE=4 SV=1;>tr|Q6PBW7|Q6PBW7_DANRE Ribosomal protein S19 OS=Danio rerio GN=rps19 PE=2 SV=1		4	4	4	4	2	4	4	3	3	4	4	4	4	4	3	3	2	2	1	1	1	2	2	2	4				1545000	911120	738030	935740	1819800	968180	3851000	5150000	5501600	1544000	1885400	2934600	425260	523260	223310	280710	0	0
245	E9QI17;B7ZCZ8	>tr|E9QI17|E9QI17_DANRE Uncharacterized protein OS=Danio rerio GN=si:ch211-236l14.3 PE=3 SV=1;>tr|B7ZCZ8|B7ZCZ8_DANRE Novel protein similar to vertebrate carnitine palmitoyltransferase 1A (Liver) (CPT1A) (Fragment) OS=Danio rerio GN=si:ch211-236l14.3 PE=3		4	4	0	2	0	2	2	2	3	4	4	0	1	3	0	2	2	2	1	0	0	0	3	3	1				0	109960	0	269440	328500	187750	116390	303230	388450	0	0	164310	0	136630	157760	170700	0	0
618	E9QJ46;Q6NZZ2;REV__Q1LV08;REV__Q7ZU29	>tr|E9QJ46|E9QJ46_DANRE Uncharacterized protein OS=Danio rerio GN=arpc4 PE=4 SV=1;>tr|Q6NZZ2|Q6NZZ2_DANRE Actin related protein 2/3 complex, subunit 4 OS=Danio rerio GN=arpc4l PE=2 SV=1		4	4	4	4	4	2	4	2	2	2	3	2	1	4	0	2	2	2	0	1	1	1	2	1	1				669700	1664500	1537400	228020	149110	0	169690	0	204090	183140	0	98482	0	0	346090	0	0	0
623	F1Q4N4;F1QJ15	>tr|F1Q4N4|F1Q4N4_DANRE Uncharacterized protein OS=Danio rerio GN=OTTDARG00000027488 PE=3 SV=1;>tr|F1QJ15|F1QJ15_DANRE Uncharacterized protein OS=Danio rerio GN=ndufs2 PE=3 SV=1		4	4	3	2	3	3	4	3	4	4	4	1	1	4	1	3	3	0	0	0	1	0	1	0	2				628870	411260	282840	330760	224220	215090	191820	792980	542750	0	0	160870	0	121310	339510	0	0	0
625	F1Q4Q4	>tr|F1Q4Q4|F1Q4Q4_DANRE Uncharacterized protein OS=Danio rerio GN=lmf2b PE=4 SV=1		4	4	3	2	3	3	2	2	1	2	2	1	2	2	1	2	0	0	0	0	0	0	0	0	0				1046100	0	547290	947090	887310	670200	0	1236300	0	0	244500	459470	0	379710	0	0	0	0
634	F1Q593;A3KQE5	>tr|F1Q593|F1Q593_DANRE Uncharacterized protein OS=Danio rerio GN=si:dkey-27a13.3 PE=4 SV=1		4	3	0	0	0	3	3	4	2	2	2	4	4	4	3	4	1	2	1	3	1	1	0	2	0				0	0	0	0	0	1695400	1117700	0	0	2050200	1798200	1288300	1137000	1341600	0	0	0	932230
635	F1Q5A5;Q1MTA9	>tr|F1Q5A5|F1Q5A5_DANRE Uncharacterized protein OS=Danio rerio GN=si:dkey-56p7.8 PE=3 SV=1;>tr|Q1MTA9|Q1MTA9_DANRE Novel protein similar to vertebrate carnitine palmitoyltransferase 1A (Liver) (CPT1A) OS=Danio rerio GN=si:dkey-56p7.8 PE=3 SV=1		4	4	4	3	4	3	3	4	3	4	4	2	2	2	2	1	0	0	1	0	0	0	1	0	0				1198000	510280	385610	418250	353200	281360	315010	638670	706170	0	0	0	204400	0	0	0	0	0
636	F1Q5B5;F1QPK0;E7F9U9;E7F5Z7;F1QU73;E9QCQ8;E9QHW5	>tr|F1Q5B5|F1Q5B5_DANRE Alkaline phosphatase OS=Danio rerio GN=alp PE=3 SV=1;>tr|F1QPK0|F1QPK0_DANRE Alkaline phosphatase OS=Danio rerio GN=alp PE=3 SV=1;>tr|E7F9U9|E7F9U9_DANRE Alkaline phosphatase OS=Danio rerio GN=alp PE=3 SV=1;>tr|E7F5Z7|E7F5Z7_DANRE A		4	4	1	0	2	4	3	3	1	2	4	0	0	0	1	1	0	3	0	0	1	0	0	0	0				0	0	0	368140	188580	293960	0	0	75961	0	0	0	0	0	0	0	0	0
647	F1Q6I6	>tr|F1Q6I6|F1Q6I6_DANRE Uncharacterized protein (Fragment) OS=Danio rerio GN=CR352324.2 PE=3 SV=1		4	4	1	1	1	1	1	1	3	3	4	0	1	1	0	0	0	0	0	0	0	0	0	0	0				0	0	0	0	0	0	2165100	3896100	7334700	0	0	0	0	0	0	0	0	0
704	F1QAF6;F1R1P2;F1QG71;F1Q9D4;E9QF86;F1QM88;F1QRI1;Q561S7;F1Q9U4;F1QL72;F1R251	>tr|F1QAF6|F1QAF6_DANRE Uncharacterized protein OS=Danio rerio GN=ugt1ab PE=3 SV=1;>tr|F1R1P2|F1R1P2_DANRE Uncharacterized protein OS=Danio rerio GN=ugt1ab PE=3 SV=1;>tr|F1QG71|F1QG71_DANRE Uncharacterized protein OS=Danio rerio GN=ugt1ab PE=3 SV=1;>tr|F1Q		4	3	2	1	2	3	4	3	2	3	2	0	1	2	0	0	0	0	0	0	0	0	0	0	0				127320	0	190860	160660	198200	138770	109580	274220	328860	0	0	43509	0	0	0	0	0	0
711	F1QAU8	>tr|F1QAU8|F1QAU8_DANRE Uncharacterized protein (Fragment) OS=Danio rerio GN=im:7165146 PE=4 SV=1		4	4	0	0	0	4	4	3	1	3	2	0	1	2	0	0	2	2	0	2	0	0	1	1	0				0	0	0	2806700	1822100	1869900	0	81886	55297	0	0	60345	0	0	145950	132810	0	51668
734	F1QCE3	>tr|F1QCE3|F1QCE3_DANRE Uncharacterized protein OS=Danio rerio GN=prdx5 PE=4 SV=1		4	4	0	0	0	0	0	0	3	1	2	3	1	1	1	0	1	2	1	1	4	3	4	4	3				0	0	0	0	0	0	887150	0	166970	272860	0	0	0	0	0	0	0	0
755	F1QDS5	>tr|F1QDS5|F1QDS5_DANRE Uncharacterized protein (Fragment) OS=Danio rerio GN=BX927282.1 PE=4 SV=1		4	4	0	0	0	0	1	2	0	1	0	0	0	2	4	3	0	0	0	0	0	0	3	1	1				0	0	0	0	0	42376	0	0	0	0	0	18869	973410	1010600	0	0	0	0
765	F1QEF1;D3XD69;F1QYW1;E7F408;D3XD65;F1RCH0;F1QUG3;F1QCF6;F1R5Y7	>tr|F1QEF1|F1QEF1_DANRE Uncharacterized protein (Fragment) OS=Danio rerio GN=ugt1b1 PE=3 SV=1		4	3	3	3	2	3	4	2	3	4	3	2	3	3	1	1	1	2	1	0	1	0	2	0	0				1775800	1689400	1657700	1237200	681860	368350	313010	1333100	763510	115630	167970	273960	0	0	0	121470	0	0
782	F1QFL1;F1QVW1;F1R934;F1QME3	>tr|F1QFL1|F1QFL1_DANRE Uncharacterized protein OS=Danio rerio GN=mars PE=3 SV=1;>tr|F1QVW1|F1QVW1_DANRE Uncharacterized protein OS=Danio rerio GN=mars PE=3 SV=1;>tr|F1R934|F1R934_DANRE Uncharacterized protein OS=Danio rerio GN=mars PE=3 SV=1;>tr|F1QME3|F1		4	4	4	3	4	0	1	1	1	1	0	1	2	1	0	0	0	0	0	0	1	0	0	0	1				1335300	2466000	873500	0	0	0	0	0	0	0	374740	0	0	0	0	0	0	0
789	F1QFV6	>tr|F1QFV6|F1QFV6_DANRE Uncharacterized protein OS=Danio rerio GN=rpl28l PE=4 SV=1		4	4	2	1	1	3	3	4	3	4	3	4	4	4	3	4	2	0	0	0	0	0	0	1	0				0	0	0	0	2701600	0	0	0	6268800	8595700	3269700	3531600	0	0	0	0	0	0
687	F1QG79;F1Q8S5	>tr|F1QG79|F1QG79_DANRE Uncharacterized protein (Fragment) OS=Danio rerio GN=col4a1 PE=4 SV=1;>tr|F1Q8S5|F1Q8S5_DANRE Uncharacterized protein (Fragment) OS=Danio rerio GN=col4a1 PE=4 SV=1		4	2	4	3	3	4	4	4	2	3	3	1	1	1	1	1	1	2	2	1	1	1	2	2	2				2000800	0	0	6174600	5890700	4402500	0	0	0	0	0	0	0	0	0	0	0	0
795	F1QG80	>tr|F1QG80|F1QG80_DANRE Uncharacterized protein OS=Danio rerio GN=zgc:123327 PE=4 SV=1		4	4	3	3	3	3	3	3	2	2	2	3	3	4	2	3	2	3	4	3	3	3	2	2	3				1244200	1053400	795340	2732700	3575300	4455900	5541200	6216500	10701000	8618200	5907300	8679300	5252400	5926000	1861100	1276600	1372700	2809100
511	F1QGH7;E7FC99	>tr|F1QGH7|F1QGH7_DANRE Uncharacterized protein OS=Danio rerio GN=ctnnb1 PE=4 SV=1;>tr|E7FC99|E7FC99_DANRE Uncharacterized protein OS=Danio rerio GN=CABZ01092303.1 PE=4 SV=1		4	1	1	1	2	1	1	0	2	2	2	3	2	0	2	2	1	1	1	1	2	1	3	1	2				0	0	0	0	0	0	0	0	0	0	0	0	0	0	0	0	0	0
637	F1QI63;F1Q5D8	>tr|F1QI63|F1QI63_DANRE Uncharacterized protein (Fragment) OS=Danio rerio GN=vtnb PE=4 SV=1;>tr|F1Q5D8|F1Q5D8_DANRE Uncharacterized protein OS=Danio rerio GN=vtnb PE=4 SV=1		4	4	0	0	0	3	3	4	4	2	2	3	4	4	4	4	2	4	4	4	4	4	3	3	4				0	0	0	81677	63515	124830	211160	165890	129980	461510	602050	283080	640120	567920	149080	200080	382090	384080
830	F1QIJ3	>tr|F1QIJ3|F1QIJ3_DANRE Uncharacterized protein OS=Danio rerio GN=BX681417.1 PE=4 SV=1		4	4	0	0	0	0	0	0	2	1	1	0	0	0	3	2	2	1	2	0	0	0	3	3	3				0	0	0	0	0	0	0	0	0	0	0	0	194870	0	128440	0	192920	0
838	F1QJ86;Q6DHP2	>tr|F1QJ86|F1QJ86_DANRE Uncharacterized protein (Fragment) OS=Danio rerio GN=tnni2b.2 PE=4 SV=1;>tr|Q6DHP2|Q6DHP2_DANRE Troponin I, skeletal, fast 2b.2 OS=Danio rerio GN=tnni2b.2 PE=2 SV=1		4	4	0	0	0	2	3	4	4	3	3	4	3	4	3	3	3	3	3	1	0	3	2	0	0				0	0	0	411110	301250	906960	612770	308780	244410	837220	613330	1002200	389970	293400	206000	236400	503560	0
839	F1QJ99	>tr|F1QJ99|F1QJ99_DANRE Uncharacterized protein (Fragment) OS=Danio rerio GN=cox5ab PE=4 SV=1		4	1	3	3	3	3	4	4	4	3	3	3	4	4	3	4	3	4	3	3	2	3	4	4	4				0	0	0	0	0	0	0	0	0	0	0	0	0	0	0	0	0	0
862	F1QKF2	>tr|F1QKF2|F1QKF2_DANRE Uncharacterized protein OS=Danio rerio GN=atp2b4 PE=3 SV=1		4	3	4	0	2	1	1	1	3	4	4	3	2	3	3	3	1	2	0	0	3	2	2	1	1				349960	0	0	0	0	0	351930	842150	1340100	213850	524750	317990	439560	344250	0	0	0	0
863	F1QKH3;F1Q6Z9	>tr|F1QKH3|F1QKH3_DANRE Uncharacterized protein OS=Danio rerio GN=GANAB (3 of 3) PE=4 SV=1;>tr|F1Q6Z9|F1Q6Z9_DANRE Uncharacterized protein (Fragment) OS=Danio rerio GN=CR383676.1 PE=4 SV=1		4	4	1	2	1	3	3	4	3	3	1	3	2	4	4	3	3	4	3	4	4	4	3	3	3				0	88509	0	96900	56457	149960	159580	98464	0	261930	194290	304590	1220100	393350	198790	288480	129530	229900
882	F1QMW6;Q0GFG2	>tr|F1QMW6|F1QMW6_DANRE Uncharacterized protein (Fragment) OS=Danio rerio GN=CR388007.1 PE=4 SV=1;>tr|Q0GFG2|Q0GFG2_DANRE Cyclic nucleotide-gated channel CNGA5 OS=Danio rerio GN=cnga5 PE=2 SV=1		4	4	3	4	4	0	0	1	0	0	0	0	0	0	0	0	0	0	0	0	0	0	0	0	0				2112900	2223900	2849600	0	0	0	0	0	0	0	0	0	0	0	0	0	0	0
888	F1QNG7	>tr|F1QNG7|F1QNG7_DANRE Uncharacterized protein OS=Danio rerio GN=npc1 PE=4 SV=1		4	4	3	3	3	3	4	1	0	3	2	0	0	0	0	0	1	0	0	0	1	1	0	0	0				1173700	1058100	1298300	786890	1144700	0	0	473010	396170	0	0	0	0	0	0	0	0	0
916	F1QRB8	>tr|F1QRB8|F1QRB8_DANRE Uncharacterized protein OS=Danio rerio GN=serpine1 PE=3 SV=1		4	4	0	0	0	3	2	2	1	0	0	4	4	3	2	3	1	1	1	2	4	3	2	0	0				0	0	0	212250	184520	249400	0	0	0	451920	187280	133780	0	171600	0	0	0	248080
923	F1QS73	>tr|F1QS73|F1QS73_DANRE Uncharacterized protein (Fragment) OS=Danio rerio GN=CR853281.1 PE=4 SV=1		4	4	0	0	1	4	4	2	0	0	0	0	0	0	0	0	0	0	1	0	0	0	0	0	0				0	0	0	468480	269230	328920	0	0	0	0	0	0	0	0	0	0	0	0
939	F1QTD7	>tr|F1QTD7|F1QTD7_DANRE Glutathione peroxidase (Fragment) OS=Danio rerio GN=CU469585.1 PE=3 SV=1		4	4	4	4	4	0	0	0	0	0	0	0	0	0	0	0	0	0	0	0	0	0	0	0	0				2668800	5798200	1527100	0	0	0	0	0	0	0	0	0	0	0	0	0	0	0
952	F1QUG2;Q7ZVA4	>tr|F1QUG2|F1QUG2_DANRE Uncharacterized protein (Fragment) OS=Danio rerio GN=s100a10b PE=4 SV=1;>tr|Q7ZVA4|Q7ZVA4_DANRE S100 calcium binding protein A10b OS=Danio rerio GN=s100a10b PE=2 SV=1		4	4	1	1	1	4	4	1	4	4	3	4	3	3	3	3	4	3	2	4	4	4	3	3	4				0	0	0	378670	278380	0	706750	603520	370490	7572500	10639000	7174400	1043900	1517800	7057300	7528500	551140	5103000
957	F1QUX0;Q7SZZ3	>tr|F1QUX0|F1QUX0_DANRE Uncharacterized protein OS=Danio rerio GN=si:ch211-237l4.5 PE=4 SV=1;>tr|Q7SZZ3|Q7SZZ3_DANRE Novel protein similar to human and fugu procollagen C-endopeptidase enhancer (PCOLCE, zgc:136636) OS=Danio rerio GN=si:ch211-237l4.5 PE=2 S		4	4	1	1	2	1	2	3	4	3	3	3	2	3	3	3	3	3	3	2	1	2	2	4	3				0	0	459600	0	436560	463130	3504700	2359200	2265000	5329400	1424900	1357100	2666400	2080600	759520	845330	1383000	1662300
964	F1QVH5;F1R047	>tr|F1QVH5|F1QVH5_DANRE Uncharacterized protein OS=Danio rerio GN=pfkmb PE=3 SV=1;>tr|F1R047|F1R047_DANRE Uncharacterized protein OS=Danio rerio GN=pfkmb PE=3 SV=1		4	2	0	0	0	0	0	0	0	0	0	0	0	0	0	0	0	4	2	0	1	1	2	1	0				0	0	0	0	0	0	0	0	0	0	0	0	0	0	0	202990	0	0
977	F1QXB1;E9QFA9	>tr|F1QXB1|F1QXB1_DANRE Uncharacterized protein OS=Danio rerio GN=cdh1 PE=3 SV=1;>tr|E9QFA9|E9QFA9_DANRE Uncharacterized protein OS=Danio rerio GN=cdh1 PE=4 SV=1		4	4	0	1	0	2	3	2	4	3	4	3	4	4	3	4	2	2	2	1	1	2	0	0	2				0	0	0	1370900	1280700	1003100	1317700	1166100	1183900	2937000	2740300	1892600	2129300	1843100	2220200	1431800	1086800	0
614	F1QXF8;E9QHX8	>tr|F1QXF8|F1QXF8_DANRE Uncharacterized protein OS=Danio rerio GN=ssr4 PE=4 SV=1;>tr|E9QHX8|E9QHX8_DANRE Uncharacterized protein OS=Danio rerio GN=ssr4 PE=4 SV=1		4	4	4	4	4	3	4	4	4	4	4	3	3	3	3	3	2	2	2	2	3	3	3	1	3				10675000	7900300	8657500	6341400	6339500	3926800	6995600	4427600	3170600	3217500	2424400	2999000	1958600	1934000	589210	162300	131730	333010
987	F1QYB2;Q1LVL6	>tr|F1QYB2|F1QYB2_DANRE Uncharacterized protein OS=Danio rerio GN=cthrc1b PE=4 SV=1;>tr|Q1LVL6|Q1LVL6_DANRE Novel protein similar to vertebrate collagen triple helix repeat containing 1 (CTHRC1) (Fragment) OS=Danio rerio GN=cthrc1b PE=2 SV=1		4	4	2	1	1	3	3	2	3	2	4	3	3	2	2	2	3	4	3	3	3	3	4	3	4				744740	0	0	716990	524290	660550	2431100	0	1458400	662790	431620	0	0	0	1034700	2440100	1256400	4042300
993	F1QYU0	>tr|F1QYU0|F1QYU0_DANRE Uncharacterized protein OS=Danio rerio GN=lama4 PE=4 SV=1		4	4	0	0	0	4	3	3	0	1	1	1	1	0	0	0	1	2	1	1	3	2	2	3	1				0	0	0	314660	152980	260440	0	0	0	0	0	0	0	0	0	0	0	0
1002	F1QZS8	>tr|F1QZS8|F1QZS8_DANRE Uncharacterized protein OS=Danio rerio GN=sgcd PE=4 SV=1		4	4	2	2	2	3	3	4	2	3	3	1	1	4	2	1	3	2	2	2	2	2	1	2	2				0	0	0	1407600	1707500	1222800	0	622620	395030	0	0	300110	0	0	739110	0	658040	0
1003	F1QZU6	>tr|F1QZU6|F1QZU6_DANRE Uncharacterized protein (Fragment) OS=Danio rerio GN=FP017167.1 PE=3 SV=1		4	4	1	2	1	3	0	3	3	1	1	3	2	2	3	3	1	3	4	4	4	4	2	4	3				0	810310	0	1031900	0	1062600	683420	0	0	854950	897960	682660	977670	989570	0	1536900	1395000	1250000
85	F1R166;A5WVT8	>tr|F1R166|F1R166_DANRE Uncharacterized protein OS=Danio rerio GN=eif4a2 PE=3 SV=1;>tr|A5WVT8|A5WVT8_DANRE Novel protein similar to vertebrate eukaryotic translation initiation factor 4A, isoform 2 (EIF4A2, zgc:63783) (Fragment) OS=Danio rerio GN=eif4a2 PE		4	1	3	3	3	2	3	2	3	3	3	3	3	3	2	1	1	2	1	3	1	2	1	1	1				0	0	0	0	0	0	0	0	0	0	0	0	0	0	0	0	0	261660
956	F1R184;F1QUW8	>tr|F1R184|F1R184_DANRE Uncharacterized protein OS=Danio rerio GN=txndc5 PE=3 SV=1;>tr|F1QUW8|F1QUW8_DANRE Uncharacterized protein OS=Danio rerio GN=txndc5 PE=3 SV=1		4	4	2	3	2	3	3	3	4	2	3	3	3	4	3	3	2	3	3	4	2	3	3	3	4				255860	224050	292670	371980	253580	388000	291120	295910	221950	413320	306530	259960	434310	277120	96281	397460	294030	393700
1016	F1R1R7	>tr|F1R1R7|F1R1R7_DANRE Uncharacterized protein OS=Danio rerio GN=f13a1 PE=4 SV=1		4	4	0	2	0	0	0	0	2	2	1	2	3	1	3	3	3	3	1	1	3	1	1	1	3				0	0	0	0	0	0	137640	147580	0	0	152260	0	423750	227870	308990	271530	0	0
1022	F1R2H6	>tr|F1R2H6|F1R2H6_DANRE Uncharacterized protein OS=Danio rerio GN=hspb15 PE=3 SV=1		4	4	0	0	0	0	0	0	1	0	0	4	4	3	1	1	2	1	0	2	2	3	2	2	2				0	0	0	0	0	0	0	0	0	1406400	1233600	743490	0	0	0	0	0	0
1049	F1R4C8	>tr|F1R4C8|F1R4C8_DANRE Uncharacterized protein OS=Danio rerio GN=ndufs3 PE=3 SV=1		4	4	3	3	3	3	2	2	3	3	3	2	3	2	3	2	2	2	1	1	1	1	4	2	3				357370	286420	311520	178210	273610	211210	412180	1046500	375180	216020	193570	227820	176920	238410	182640	265690	0	0
645	F1R6I7;F1Q699;F1QNZ9	>tr|F1R6I7|F1R6I7_DANRE Uncharacterized protein (Fragment) OS=Danio rerio GN=mybpc2b PE=4 SV=1;>tr|F1Q699|F1Q699_DANRE Uncharacterized protein (Fragment) OS=Danio rerio GN=mybpc2b PE=4 SV=1;>tr|F1QNZ9|F1QNZ9_DANRE Uncharacterized protein OS=Danio rerio GN=		4	2	0	0	0	1	1	0	3	4	4	0	1	1	0	0	2	2	2	1	1	1	0	0	0				0	0	0	0	0	0	390810	495890	552420	0	0	0	0	0	772900	1033400	543770	0
1085	F1R7B5;Q561X2;Q499A0	>tr|F1R7B5|F1R7B5_DANRE Uncharacterized protein (Fragment) OS=Danio rerio GN=tmed9 PE=3 SV=1;>tr|Q561X2|Q561X2_DANRE Tmed9 protein OS=Danio rerio GN=tmed9 PE=2 SV=1;>tr|Q499A0|Q499A0_DANRE Transmembrane emp24 protein transport domain containing 9 OS=Danio		4	3	4	4	4	3	4	3	3	3	3	3	3	3	2	2	0	0	0	0	1	0	2	0	0				7158100	2892300	7210300	913700	3375100	603960	1214500	2220700	4337600	558420	509210	603420	345100	419660	0	0	0	0
1086	F1R7K1;F1R7P3	>tr|F1R7K1|F1R7K1_DANRE Uncharacterized protein OS=Danio rerio GN=prpf8 PE=4 SV=1;>tr|F1R7P3|F1R7P3_DANRE Uncharacterized protein OS=Danio rerio GN=prpf8 PE=4 SV=1		4	4	3	4	4	1	1	1	2	4	3	1	1	1	2	1	1	0	0	0	0	0	0	0	0				264010	429770	308740	0	0	0	110870	175890	156340	0	0	0	145590	0	0	0	0	0
1087	F1R7L0	>tr|F1R7L0|F1R7L0_DANRE Uncharacterized protein OS=Danio rerio GN=zgc:165525 PE=4 SV=1		4	4	4	4	1	0	0	0	0	0	0	0	1	0	0	0	0	0	0	1	1	1	0	1	2				1494600	1756100	0	0	0	0	0	0	0	0	0	0	0	0	0	0	0	0
693	F1R901;F1Q996	>tr|F1R901|F1R901_DANRE Uncharacterized protein OS=Danio rerio GN=c8a PE=4 SV=1;>tr|F1Q996|F1Q996_DANRE Uncharacterized protein OS=Danio rerio GN=c8a PE=4 SV=1		4	4	1	1	1	3	4	3	3	1	1	3	2	3	3	2	3	2	2	3	3	3	3	2	0				0	0	0	0	1434400	0	0	0	0	567590	0	0	0	0	0	0	0	0
615	F1R9P5;E9QI62	>tr|F1R9P5|F1R9P5_DANRE Uncharacterized protein (Fragment) OS=Danio rerio GN=flna PE=4 SV=1;>tr|E9QI62|E9QI62_DANRE Uncharacterized protein OS=Danio rerio GN=flna PE=4 SV=1		4	2	0	1	1	2	3	2	2	3	2	3	4	4	2	3	3	2	1	0	3	2	1	1	1				0	0	0	101110	92929	91030	0	68650	0	0	113490	82012	0	0	0	89885	0	0
893	F1RA81;F1QNU1	>tr|F1RA81|F1RA81_DANRE Uncharacterized protein OS=Danio rerio GN=bmper PE=4 SV=1;>tr|F1QNU1|F1QNU1_DANRE Uncharacterized protein OS=Danio rerio GN=bmper PE=4 SV=1		4	4	2	2	2	2	2	2	2	3	2	2	2	2	2	2	2	2	2	2	4	2	2	3	2				613260	492030	396050	339200	379240	267890	1075000	745870	752980	1346200	1097200	784070	1301700	1294000	1699000	1987900	1743500	3076700
1122	F1RAE8;Q58EE9	>tr|F1RAE8|F1RAE8_DANRE Uncharacterized protein OS=Danio rerio GN=gfap PE=3 SV=1;>sp|Q58EE9|GFAP_DANRE Glial fibrillary acidic protein OS=Danio rerio GN=gfap PE=1 SV=2		4	1	1	2	2	2	1	2	2	3	3	3	2	4	3	3	3	3	1	2	3	2	2	1	3				0	0	0	0	0	0	0	0	0	0	0	0	0	0	0	0	0	0
1124	F1RAM9	>tr|F1RAM9|F1RAM9_DANRE Uncharacterized protein OS=Danio rerio GN=tmed7 PE=3 SV=1		4	4	4	2	3	2	2	2	2	3	2	0	2	2	0	2	0	0	0	0	0	0	0	0	0				3589600	1406800	1249000	0	894390	0	676100	561550	753130	0	314170	378330	0	358300	0	0	0	0
1143	F1RD33	>tr|F1RD33|F1RD33_DANRE Uncharacterized protein (Fragment) OS=Danio rerio GN=itgbl1 PE=4 SV=1		4	2	0	0	1	3	3	4	3	3	3	3	4	3	3	3	3	3	3	4	2	4	2	2	3				0	0	0	0	0	747510	0	0	0	0	1167700	0	0	0	0	1662100	1858300	3287500
1154	F1RE85;Q8JIU7	>tr|F1RE85|F1RE85_DANRE Uncharacterized protein OS=Danio rerio GN=naca PE=4 SV=1;>sp|Q8JIU7|NACA_DANRE Nascent polypeptide-associated complex subunit alpha OS=Danio rerio GN=naca PE=1 SV=1		4	4	2	2	2	3	3	3	3	2	3	4	4	3	3	4	3	2	4	4	3	4	4	4	4				859320	826950	997340	1122900	2042700	1838300	376390	437270	474440	574750	467200	1042100	429830	425690	711970	637640	409520	1753700
414	F2Z4W5;E7F3C8;E9QHI8	>tr|F2Z4W5|F2Z4W5_DANRE Uncharacterized protein OS=Danio rerio GN=zgc:162608 PE=4 SV=1;>tr|E7F3C8|E7F3C8_DANRE Uncharacterized protein OS=Danio rerio GN=OTTDARG00000028073 PE=4 SV=2;>tr|E9QHI8|E9QHI8_DANRE Uncharacterized protein OS=Danio rerio GN=zgc:1626		4	4	0	0	0	4	3	4	2	3	2	3	2	4	4	4	0	0	1	3	2	3	1	1	2				0	0	0	271880	338280	330100	0	210000	0	199710	0	426970	2761600	4767300	0	0	0	333670
1231	Q1XHL8	>tr|Q1XHL8|Q1XHL8_DANRE G protein-coupled receptor kinase 7-1 OS=Danio rerio GN=grk7a PE=2 SV=1		4	4	4	4	4	0	0	0	1	0	0	0	0	0	0	0	2	1	1	0	0	0	0	0	0				4598700	3125000	2471200	0	0	0	0	0	0	0	0	0	0	0	938740	0	0	0
1238	Q29RC5;Q7ZSZ9;A2BHI1;A9JRY8;Q6DGB7;Q6IQN5;F1QCS6;F1QL19;E7EYX3;A8WGD1	>tr|Q29RC5|Q29RC5_DANRE Uncharacterized protein OS=Danio rerio GN=BX901900.1 PE=2 SV=1;>tr|Q7ZSZ9|Q7ZSZ9_DANRE Rac1 OS=Danio rerio GN=rac1 PE=2 SV=1;>tr|A2BHI1|A2BHI1_DANRE Ras-related C3 botulinum toxin substrate 2 (Rho family, small GTP binding protein R		4	3	3	4	3	3	4	4	1	3	3	2	2	3	2	3	1	3	2	1	2	2	1	2	1				4433900	8846300	8505800	1846900	4463100	3339700	0	1976400	2287300	457840	0	1397200	0	1169500	0	1074400	0	0
1239	Q29RF0	>tr|Q29RF0|Q29RF0_DANRE Uncharacterized protein OS=Danio rerio GN=si:dkey-98p3.2 PE=2 SV=1		4	4	0	0	0	1	1	1	3	1	1	1	1	1	1	2	2	3	3	2	4	2	4	3	4				0	0	0	0	0	0	279460	0	0	0	0	0	0	345730	566450	1490500	567790	549490
1243	Q3ZB93	>tr|Q3ZB93|Q3ZB93_DANRE Sarcoglycan, beta (Dystrophin-associated glycoprotein) OS=Danio rerio GN=sgcb PE=2 SV=1		4	4	1	0	0	4	4	3	1	2	2	0	1	1	1	0	1	1	1	0	1	1	2	0	1				0	0	0	2837700	788760	1135100	0	338760	318400	0	0	0	0	0	0	0	0	0
1248	Q4G5W3;Q7ZUD6	>tr|Q4G5W3|Q4G5W3_DANRE Reticulon 3-a2 OS=Danio rerio GN=rtn3 PE=2 SV=1;>tr|Q7ZUD6|Q7ZUD6_DANRE Reticulon 3 OS=Danio rerio GN=rtn3 PE=2 SV=1		4	4	4	2	3	2	3	2	2	2	3	3	3	3	3	2	3	3	2	0	3	2	2	2	2				10769000	2065500	8876700	0	1848900	1437100	0	0	1387000	557990	860220	837070	552510	0	926180	2631000	1040400	0
1251	Q4V8S2	>tr|Q4V8S2|Q4V8S2_DANRE Uncharacterized protein OS=Danio rerio GN=zgc:114180 PE=2 SV=1		4	3	4	4	4	0	0	0	0	0	0	0	1	0	0	0	0	0	0	0	0	0	0	0	0				2284100	1942400	1481700	0	0	0	0	0	0	0	0	0	0	0	0	0	0	0
313	Q4V914;B8JN01;B8JN00;Q1RLR9;B8JMZ9	>tr|Q4V914|Q4V914_DANRE Histone H2A OS=Danio rerio GN=h2afy2 PE=2 SV=1;>tr|B8JN01|B8JN01_DANRE Histone H2A (Fragment) OS=Danio rerio GN=CH73-343M8.1 PE=3 SV=1;>tr|B8JN00|B8JN00_DANRE Histone H2A (Fragment) OS=Danio rerio GN=CH73-343M8.1 PE=3 SV=1		4	4	2	1	2	1	1	2	4	4	3	4	3	3	3	2	3	1	0	1	2	2	1	1	3				225160	0	253940	0	0	193650	2749000	1535200	9631500	3144500	1276800	1480000	1456500	901060	1012200	0	0	0
1263	Q503C7;F1R5X0;E7EXT3;F1R1L6;E7F8N5	>tr|Q503C7|Q503C7_DANRE Phosphorylase OS=Danio rerio GN=pygma PE=2 SV=1;>tr|F1R5X0|F1R5X0_DANRE Phosphorylase OS=Danio rerio GN=pygb PE=3 SV=1;>tr|E7EXT3|E7EXT3_DANRE Phosphorylase OS=Danio rerio GN=pygmb PE=3 SV=1		4	3	1	2	1	1	1	1	2	3	1	0	1	1	0	0	3	2	4	2	3	3	2	0	0				0	408940	0	0	0	0	0	138440	0	0	0	0	0	0	329850	248040	190440	140110
1267	Q504B1	>tr|Q504B1|Q504B1_DANRE Uncharacterized protein OS=Danio rerio GN=zgc:109973 PE=2 SV=1		4	4	0	0	0	1	1	1	3	4	2	3	4	4	4	4	1	2	3	1	2	2	3	1	2				0	0	0	0	0	0	1502600	718390	660020	1135900	2873500	1735300	665590	989250	0	213810	610970	0
1271	Q566W6	>tr|Q566W6|Q566W6_DANRE Uncharacterized protein OS=Danio rerio GN=zgc:112425 PE=2 SV=1		4	4	3	2	4	1	1	1	1	2	1	2	3	3	3	3	0	0	1	0	1	1	1	0	2				1010300	0	1047600	0	0	0	0	95149	0	0	121340	288180	142530	222390	0	0	0	0
1273	Q567Y2	>tr|Q567Y2|Q567Y2_DANRE Novel protein (Zgc:110660) OS=Danio rerio GN=rgr PE=2 SV=1		4	4	4	4	3	0	0	0	0	0	0	0	0	0	0	0	0	0	0	0	0	0	0	0	0				16394000	14550000	16589000	0	0	0	0	0	0	0	0	0	0	0	0	0	0	0
1277	Q5BJ11;E7F0T7	>tr|Q5BJ11|Q5BJ11_DANRE Guanine nucleotide binding protein (G protein), beta polypeptide 2 OS=Danio rerio GN=gnb2 PE=2 SV=1		4	2	4	4	3	4	4	4	4	4	4	2	3	2	2	1	0	0	0	0	1	0	2	0	1				393860	270840	481040	368050	713740	339210	126970	335310	291070	134470	152360	0	0	0	0	0	0	0
1284	Q5CZQ1	>tr|Q5CZQ1|Q5CZQ1_DANRE Tyrosine 3-monooxygenase/tryptophan 5-monooxygenase activation protein, epsilon polypeptide 2 OS=Danio rerio GN=ywhae2 PE=2 SV=1		4	1	2	2	3	2	2	2	3	3	2	4	4	4	3	3	3	2	3	3	3	3	2	3	3				0	0	0	0	0	0	0	0	0	0	0	0	0	0	0	0	0	0
1295	Q5RGP5	>tr|Q5RGP5|Q5RGP5_DANRE Novel protein similar to vertebrate dual specificity phosphatase 23 (DUSP23) OS=Danio rerio GN=si:dkeyp-95d10.1 PE=2 SV=1		4	4	3	4	3	1	1	1	4	3	3	2	0	0	0	0	0	0	0	0	0	0	0	0	0				748220	2519000	661620	0	0	0	1507200	543140	463100	401990	0	0	0	0	0	0	0	0
1297	Q5RH26	>tr|Q5RH26|Q5RH26_DANRE ATP synthase gamma chain OS=Danio rerio GN=atp5c1 PE=2 SV=1		4	4	3	4	4	3	4	3	3	4	3	3	2	2	1	3	2	3	2	1	1	0	2	2	1				2387000	1286100	1816900	2632400	2597600	3214900	981320	2246000	2436500	816090	694690	839300	0	426460	1698100	2436800	845560	0
917	Q5RH53;F1QRN9;Q4LES0;F1QJP8	>tr|Q5RH53|Q5RH53_DANRE Angiopoietin-like protein OS=Danio rerio GN=angptl1 PE=4 SV=1;>tr|F1QRN9|F1QRN9_DANRE Uncharacterized protein OS=Danio rerio GN=angptl1 PE=4 SV=1		4	3	0	0	0	0	0	1	2	1	1	2	0	0	2	2	1	1	2	2	3	3	1	1	2				0	0	0	0	0	0	0	0	0	60273	0	0	65678	68230	0	0	227240	423320
1301	Q5RI43	>tr|Q5RI43|Q5RI43_DANRE Keratocan OS=Danio rerio GN=kera PE=2 SV=1		4	4	1	1	1	3	3	4	1	1	1	1	1	1	1	1	1	2	1	0	0	0	1	1	0				0	0	0	4071100	2365800	11420000	0	0	0	0	0	0	0	0	0	742480	0	0
1309	Q5TYP7;F1QZ37;F1REK6	>tr|Q5TYP7|Q5TYP7_DANRE Novel protein similar to human and mouse EH-domain containing 3 (EHD3) OS=Danio rerio GN=ehd3 PE=4 SV=1		4	2	2	2	2	3	3	4	1	2	1	1	3	2	1	1	0	0	0	0	1	1	1	2	1				0	0	0	184090	162430	191460	0	0	0	0	0	0	0	0	0	0	0	0
1349	Q6DEJ9	>tr|Q6DEJ9|Q6DEJ9_DANRE Dolichyl-phosphate mannosyltransferase polypeptide 1, catalytic subunit OS=Danio rerio GN=dpm1 PE=2 SV=1		4	4	4	3	3	3	3	1	2	3	2	2	1	2	1	1	1	1	0	0	0	0	1	1	0				965330	1770500	3109400	464890	607650	0	361660	485550	447630	244100	0	302990	0	0	0	0	0	0
760	Q6DGM0;F1QE85	>tr|Q6DGM0|Q6DGM0_DANRE Ribosomal protein L35a OS=Danio rerio GN=rpl35a PE=2 SV=1;>tr|F1QE85|F1QE85_DANRE Uncharacterized protein (Fragment) OS=Danio rerio GN=rpl35a PE=4 SV=1		4	4	3	3	3	2	2	1	2	2	2	2	2	2	2	1	1	0	0	0	1	0	0	0	0				4374400	4053500	5908800	1235400	1941100	0	1845400	1122700	1881400	0	889700	646510	0	0	0	0	0	0
1379	Q6GML6	>tr|Q6GML6|Q6GML6_DANRE Protease, serine, 35 OS=Danio rerio GN=prss35 PE=2 SV=1		4	4	1	1	1	0	1	0	3	3	1	2	2	3	3	2	0	1	1	0	1	1	3	1	0				0	0	0	0	0	0	0	126160	0	345040	324980	0	0	415770	0	0	0	0
1399	Q6NVA6	>tr|Q6NVA6|Q6NVA6_DANRE Myosin, light polypeptide 9, regulatory OS=Danio rerio GN=myl9l PE=2 SV=1		4	1	0	0	0	4	4	4	4	4	2	4	4	3	1	2	0	0	1	0	2	0	2	2	2				0	0	0	0	0	0	0	0	0	0	0	0	0	0	0	0	0	0
1414	Q6NX98	>tr|Q6NX98|Q6NX98_DANRE Suppression of tumorigenicity 13 (Colon carcinoma) (Hsp70 interacting protein) OS=Danio rerio GN=st13 PE=2 SV=1		4	4	2	1	0	3	3	3	1	2	2	3	3	2	1	2	3	2	2	2	2	3	2	1	2				43731	0	0	89029	133280	114820	0	49474	26415	180360	86149	214730	0	151090	765790	1892100	202540	2652600
588	Q6NYD8;Q78AP9;Q7ZUZ7;E9QEB6	>tr|Q6NYD8|Q6NYD8_DANRE ADP-ribosylation factor 2 OS=Danio rerio GN=arf2 PE=2 SV=1;>tr|Q78AP9|Q78AP9_DANRE ADP-ribosylation factor 3b OS=Danio rerio GN=arf3b PE=2 SV=1;>tr|Q7ZUZ7|Q7ZUZ7_DANRE ADP-ribosylation factor 1 OS=Danio rerio GN=arf1l PE=2 SV=1;>tr|		4	0	4	3	3	4	3	4	3	4	4	2	3	4	3	3	3	1	1	2	2	1	2	2	2				0	0	0	0	0	0	0	0	0	0	0	0	0	0	0	0	0	0
1428	Q6P025;Q6DH55	>tr|Q6P025|Q6P025_DANRE Gnb3 protein OS=Danio rerio GN=gnb3b PE=2 SV=1		4	4	4	3	2	0	0	1	0	0	1	0	0	0	1	1	0	0	0	0	1	0	0	0	0				7849300	4825800	7227300	0	0	0	0	0	0	0	0	0	0	0	0	0	0	0
1452	Q6P5M5;Q7ZUW4	>tr|Q6P5M5|Q6P5M5_DANRE Novel protein (Zgc:77650 ) OS=Danio rerio GN=DKEYP-1H4.11 PE=2 SV=1;>tr|Q7ZUW4|Q7ZUW4_DANRE ADP-ribosylation factor 5 OS=Danio rerio GN=arf5 PE=2 SV=1		4	1	4	2	3	3	3	3	3	4	4	1	3	3	3	2	2	1	1	1	2	1	1	1	1				0	0	0	0	0	0	0	0	1083800	0	0	0	0	0	0	0	0	0
1477	Q6PC77	>tr|Q6PC77|Q6PC77_DANRE ATP synthase, H+ transporting, mitochondrial F0 complex, subunit d OS=Danio rerio GN=atp5h PE=2 SV=1		4	4	1	1	1	3	3	4	3	2	2	2	2	2	1	1	1	2	3	1	1	2	4	3	4				0	0	0	1709600	773350	1667500	811320	278890	599020	756660	382720	602280	0	0	0	343310	318970	0
1478	Q6PC80	>tr|Q6PC80|Q6PC80_DANRE Ribosomal protein S5 OS=Danio rerio GN=rps5 PE=2 SV=1		4	4	4	3	4	2	3	2	4	4	4	1	2	3	2	3	0	1	1	1	1	1	1	1	1				3083900	965870	3116700	1389100	1341100	1202000	1271600	2809900	2837900	0	885090	1510700	1327400	1255100	0	0	0	0
1479	Q6PC90	>tr|Q6PC90|Q6PC90_DANRE 40S ribosomal protein S12 OS=Danio rerio GN=rps12 PE=2 SV=1		4	4	4	4	2	2	4	4	3	3	3	2	2	3	2	2	1	0	1	1	1	2	2	0	1				348010	405600	317580	0	233690	244620	1004700	987430	867920	0	712470	1086900	274670	217940	0	0	0	0
1488	Q6PGV1;F1Q4U4	>tr|Q6PGV1|Q6PGV1_DANRE ATPase, H+ transporting, V0 subunit D isoform 1 OS=Danio rerio GN=atp6v0d1 PE=2 SV=1		4	4	4	4	4	3	2	2	1	2	2	1	2	1	1	0	1	0	0	0	0	0	2	0	0				803870	1666900	740630	620820	920310	1218800	0	0	0	0	0	0	0	0	0	0	0	0
1490	Q6PH46	>tr|Q6PH46|Q6PH46_DANRE T-complex protein 1 subunit delta OS=Danio rerio GN=cct4 PE=2 SV=1		4	4	4	4	4	3	4	3	3	4	4	4	3	4	3	1	1	2	0	1	3	1	2	1	1				721960	511140	1037400	373150	356220	593540	294290	611690	494940	170660	304860	406410	105940	0	0	98305	0	0
1494	Q6PHJ8	>tr|Q6PHJ8|Q6PHJ8_DANRE Myosin, light polypeptide 9, like OS=Danio rerio GN=myl12.1 PE=2 SV=1		4	1	0	0	0	4	4	4	4	4	3	4	4	4	2	4	0	1	1	0	3	1	3	1	2				0	0	0	0	0	0	0	0	0	0	0	0	0	0	0	49658	0	0
1529	Q7SYB8;Q5RGX8	>tr|Q7SYB8|Q7SYB8_DANRE Uncharacterized protein OS=Danio rerio GN=gys1 PE=2 SV=1;>tr|Q5RGX8|Q5RGX8_DANRE Glycogen synthase 2 OS=Danio rerio GN=gys2 PE=2 SV=1		4	4	2	2	0	4	2	2	2	3	3	0	0	0	0	0	2	2	0	0	0	1	2	1	0				119580	174500	0	193620	205050	0	102140	170200	188550	0	0	0	0	0	0	103050	0	0
1534	Q7SZD2;F1Q7P7	>tr|Q7SZD2|Q7SZD2_DANRE Solute carrier family 16 (Monocarboxylic acid transporters), member 8 OS=Danio rerio GN=slc16a8 PE=2 SV=1		4	4	0	0	0	1	2	2	3	2	2	3	3	3	3	4	1	3	2	3	2	3	3	3	3				0	0	0	0	249710	464990	1326000	498560	516850	1951400	7726100	1530200	1134400	976140	0	504220	0	1002400
1535	Q7SZP4;F1QCR7;F1Q765;F1RA80;A2ATX5;F1Q8F1;F1Q769;Q502B1	>tr|Q7SZP4|Q7SZP4_DANRE Novel protein containing an intermediate filament protein domain (Zgc:65851) OS=Danio rerio GN=DKEY-202N14.3 PE=2 SV=1		4	1	3	3	2	3	3	2	3	2	2	4	4	3	3	3	2	0	0	0	2	2	0	0	1				0	0	0	0	0	0	0	0	0	0	0	0	0	0	0	0	0	0
1542	Q7T2E0	>tr|Q7T2E0|Q7T2E0_DANRE CD82 antigen OS=Danio rerio GN=cd82 PE=2 SV=1		4	4	2	1	1	1	1	0	1	2	2	0	0	1	3	3	1	1	0	0	0	0	2	0	0				323590	0	0	0	0	0	0	376680	310840	0	0	0	2851600	1084700	0	0	0	0
613	Q7T314;E9QHS7;E9QGZ2;Q6NWH3	>tr|Q7T314|Q7T314_DANRE Translocase of outer mitochondrial membrane 40 homolog (Yeast) OS=Danio rerio GN=tomm40 PE=2 SV=1;>tr|E9QHS7|E9QHS7_DANRE Uncharacterized protein OS=Danio rerio GN=tomm40 PE=4 SV=1;>tr|E9QGZ2|E9QGZ2_DANRE Uncharacterized protein OS=		4	4	4	4	4	3	3	4	4	4	3	1	2	3	2	2	0	0	0	0	0	0	0	0	0				8022600	1295100	4676200	1040000	1148000	586890	374690	721500	501040	0	590990	510730	0	0	0	0	0	0
1552	Q7T3D3;Q7ZW82;Q6TNT8;A9JTC8;E7EXJ0;F1QDT7;E7EZU5	>tr|Q7T3D3|Q7T3D3_DANRE Guanine nucleotide binding protein (G protein), alpha inhibiting activity polypeptide 1 OS=Danio rerio GN=gnai1 PE=2 SV=1;>tr|Q7ZW82|Q7ZW82_DANRE Guanine nucleotide binding protein (G protein), alpha inhibiting activity polypeptide		4	2	3	4	4	4	4	2	3	3	3	2	3	4	2	2	1	1	0	0	1	1	0	0	1				0	736030	389300	0	0	0	0	0	0	0	0	0	0	0	0	0	0	0
1556	Q7ZT21;E9QF43	>tr|Q7ZT21|Q7ZT21_DANRE Embryonic alpha globin e1 OS=Danio rerio GN=hbae1 PE=2 SV=1		4	4	4	3	3	4	3	2	4	4	3	4	3	4	2	3	0	0	0	1	2	0	0	0	0				8925400	9243400	10686000	1369000	770050	1967400	3782600	8333600	1492300	211060	279370	1772200	491510	404970	0	0	0	0
1564	Q7ZU67;Q802C9	>tr|Q7ZU67|Q7ZU67_DANRE Eukaryotic translation initiation factor 4A isoform 1B OS=Danio rerio GN=eif4a1b PE=2 SV=1;>tr|Q802C9|Q802C9_DANRE Eukaryotic translation initiation factor 4A, isoform 1A OS=Danio rerio GN=eif4a1a PE=2 SV=1		4	1	3	3	3	3	4	3	4	4	4	3	3	3	2	2	1	2	1	2	1	2	1	1	1				448430	779290	641320	360060	376820	316500	439640	624890	498540	330350	259500	465160	205820	276930	0	269750	0	248180
1575	Q7ZV05;A9C3W5	>tr|Q7ZV05|Q7ZV05_DANRE Ribosomal protein S11 OS=Danio rerio GN=rps11 PE=2 SV=1;>tr|A9C3W5|A9C3W5_DANRE Novel protein similar to ribosomal protein S11 (Rps11) (Fragment) OS=Danio rerio GN=si:dkey-159f12.2 PE=4 SV=1		4	4	3	3	3	4	4	4	2	3	2	3	2	2	2	3	3	2	3	3	3	2	2	2	1				2395600	1540000	3078900	1998900	2479000	1467500	2960700	5293200	5979000	12902000	4947400	4626300	3269900	3139500	3483800	3277600	1821400	1550500
1585	Q7ZW20;F1QFK2	>tr|Q7ZW20|Q7ZW20_DANRE Tyrosine 3-monooxygenase/tryptophan 5-monooxygenase activation protein, epsilon polypeptide 1 OS=Danio rerio GN=ywhae1 PE=2 SV=1;>tr|F1QFK2|F1QFK2_DANRE Uncharacterized protein (Fragment) OS=Danio rerio GN=ywhae1 PE=4 SV=1		4	1	2	2	4	2	2	2	4	4	3	3	4	3	3	3	3	2	4	3	3	3	3	3	3				0	0	88687	0	0	0	28576	52327	30142	0	30374	0	0	0	0	0	36769	0
1586	Q7ZW95	>tr|Q7ZW95|Q7ZW95_DANRE Ribosomal protein L4 OS=Danio rerio GN=rpl4 PE=2 SV=1		4	4	2	2	1	3	4	3	4	2	2	3	4	4	1	2	1	2	1	1	1	1	0	2	1				0	0	0	1353200	1694600	1564900	2539300	3362800	2546500	3175200	1506700	1585600	0	1132700	0	0	0	0
1121	Q7ZZJ7;F1RAE7;Q08CS0	>tr|Q7ZZJ7|Q7ZZJ7_DANRE Erythroid band 3 anion exchanger 1 OS=Danio rerio GN=slc4a1 PE=2 SV=1;>tr|F1RAE7|F1RAE7_DANRE Uncharacterized protein OS=Danio rerio GN=slc4a1 PE=4 SV=1		4	4	1	1	1	1	1	2	2	2	3	0	1	2	0	0	1	1	0	0	2	1	1	1	0				0	0	0	0	0	0	306420	234850	349180	0	0	145770	0	0	0	0	0	0
1593	Q801U3;Q801U4	>tr|Q801U3|Q801U3_DANRE Splicing factor, arginine/serine-rich 3 OS=Danio rerio GN=srsf3a PE=2 SV=1;>tr|Q801U4|Q801U4_DANRE Splicing factor, arginine/serine-rich 3 OS=Danio rerio GN=srsf3a PE=4 SV=1		4	1	2	1	1	2	3	4	4	4	4	4	4	4	4	4	2	2	3	2	2	2	3	3	3				0	0	0	0	0	0	0	0	0	0	0	0	0	0	0	0	0	0
1596	Q803D1	>tr|Q803D1|Q803D1_DANRE ADP-ribosylation factor 1 OS=Danio rerio GN=arf1 PE=2 SV=1		4	1	4	3	3	4	3	4	3	4	4	2	2	3	2	3	3	0	0	1	1	0	1	1	1				0	0	0	0	0	0	0	0	0	0	0	0	0	0	17996	0	0	0
1601	Q803M8	>tr|Q803M8|Q803M8_DANRE Tryosine 3-monooxygenase/tryptophan 5-monooxygenase activation protein, zeta polypeptide OS=Danio rerio GN=ywhaqb PE=2 SV=1		4	1	3	3	3	3	3	2	4	4	3	4	4	4	4	4	3	4	2	3	3	4	2	3	4				0	0	0	0	0	0	0	0	0	0	0	0	0	0	0	0	0	0
1610	Q804H0;Q32PQ2;B8JLZ2;E7FEY5;Q5TZ37;F1QUZ1;E7F4N0	>tr|Q804H0|Q804H0_DANRE Annexin 1c OS=Danio rerio GN=anxa1c PE=2 SV=1;>tr|Q32PQ2|Q32PQ2_DANRE Annexin A1c OS=Danio rerio GN=anxa1c PE=2 SV=1;>tr|B8JLZ2|B8JLZ2_DANRE Annexin A1c OS=Danio rerio GN=anxa1c PE=3 SV=1		4	4	2	4	3	2	3	2	3	2	2	1	0	0	0	0	1	0	1	0	0	0	0	0	0				746170	425820	519810	151860	223870	233060	412500	240700	376290	0	0	0	0	0	0	0	0	0
1662	Q9PUL9	>tr|Q9PUL9|Q9PUL9_DANRE Mitochondrial carrier homolog 2 OS=Danio rerio GN=mtch2 PE=2 SV=1		4	4	4	4	4	4	4	3	4	3	4	2	3	4	2	3	3	3	1	0	2	1	2	0	3				1049500	1004900	866390	337290	681660	439140	335280	2139000	1829600	244500	664950	306230	205600	233460	236930	126380	0	0
1664	Q9PVF8;E9QJM0;E9QEM4	>tr|Q9PVF8|Q9PVF8_DANRE Catenin (Cadherin-associated protein), alpha OS=Danio rerio GN=ctnna PE=2 SV=1;>tr|E9QJM0|E9QJM0_DANRE Uncharacterized protein OS=Danio rerio GN=ctnna PE=4 SV=1;>tr|E9QEM4|E9QEM4_DANRE Uncharacterized protein OS=Danio rerio GN=ctnna		4	3	1	2	2	3	1	2	1	2	2	3	3	4	2	3	1	0	0	1	1	2	1	1	2				0	120140	0	115760	0	0	0	161280	152410	201260	196440	239820	204710	135850	0	0	0	0
347	CON__QQ8N1N4	>QQ8N1N4 TREMBL:Q8N1N4|K2C78_HUMAN Keratin, type II cytoskeletal 78 OS=Homo sapiens GN=KRT78 PE=1 SV=2		3	1	1	3	3	2	2	2	2	1	3	2	1	1	2	2	1	0	0	1	2	0	0	0	1			+	0	0	0	0	0	0	0	0	0	14343	0	0	0	0	0	0	0	0
13	A1L244;F1QG78;A4VCH0	>sp|A1L244|SAC1A_DANRE Phosphatidylinositide phosphatase SAC1-A OS=Danio rerio GN=sacm1la PE=2 SV=1;>tr|F1QG78|F1QG78_DANRE Uncharacterized protein OS=Danio rerio GN=zgc:158642 PE=4 SV=1		3	3	2	1	1	1	2	1	0	2	1	0	1	0	0	0	0	0	0	0	0	0	0	0	0				250250	0	0	0	74548	0	0	0	0	0	0	0	0	0	0	0	0	0
244	B7ZC77;B8A6A9;F1Q548;E9QGY0;E9QHB2;B8JKG9	>sp|B7ZC77|CTNA2_DANRE Catenin alpha-2 OS=Danio rerio GN=Ctnna2 PE=3 SV=1		3	2	0	1	0	1	1	1	1	1	1	1	1	3	2	1	2	0	0	1	2	2	3	0	2				0	0	0	0	0	0	0	0	0	0	0	91964	0	0	0	0	0	0
1283	Q5BLE8	>sp|Q5BLE8|RETST_DANRE Putative all-trans-retinol 13,14-reductase OS=Danio rerio GN=retsat PE=2 SV=1		3	3	3	3	2	3	3	3	2	3	3	1	2	2	1	1	1	1	0	1	1	1	1	2	0				346840	413940	0	514000	571240	398380	279420	415940	474070	0	457540	0	0	0	0	0	0	0
892	Q5XTN8;F1QNP4	>sp|Q5XTN8|CRGNA_DANRE Gamma-crystallin N-A OS=Danio rerio GN=crygna PE=2 SV=1;>tr|F1QNP4|F1QNP4_DANRE Uncharacterized protein (Fragment) OS=Danio rerio GN=crygn1 PE=4 SV=1		3	2	3	2	3	0	1	0	3	1	1	0	0	1	0	1	0	0	0	0	0	0	0	0	0				3250900	7776600	3725100	0	0	0	525910	0	0	0	0	0	0	0	0	0	0	0
1345	Q6DBV4	>sp|Q6DBV4|PHOP1_DANRE Probable phosphatase phospho1 OS=Danio rerio GN=phospho1 PE=2 SV=1		3	3	3	2	2	2	2	2	3	3	2	2	2	3	3	3	1	1	1	0	3	1	1	1	2				332280	539130	436490	190150	203250	177800	359250	355050	349140	382090	414420	594340	9232800	7934100	0	0	0	0
1402	Q6NWB6	>sp|Q6NWB6|UCMA_DANRE Unique cartilage matrix-associated protein OS=Danio rerio GN=ucma PE=2 SV=1		3	3	0	0	1	2	2	2	3	3	3	3	3	3	3	3	2	2	2	2	1	2	1	2	3				0	0	0	7162700	7081800	2605900	15769000	5525700	3518000	29447000	26717000	21345000	16021000	15728000	4084300	3242700	5129200	14463000
1505	Q6TGY8	>sp|Q6TGY8|TTC35_DANRE Tetratricopeptide repeat protein 35 OS=Danio rerio GN=ttc35 PE=2 SV=1		3	3	3	2	3	2	2	1	1	3	3	1	1	1	0	0	1	0	0	0	0	0	0	0	0				1034300	405570	666920	0	0	0	0	977170	734100	0	0	0	0	0	0	0	0	0
1567	Q7ZUC2	>sp|Q7ZUC2|CAB45_DANRE 45 kDa calcium-binding protein OS=Danio rerio GN=sdf4 PE=2 SV=1		3	3	0	0	0	0	0	1	2	1	1	2	2	3	3	2	2	2	1	2	1	2	3	2	3				0	0	0	0	0	0	544880	0	0	824700	736980	460700	402090	367830	476770	647340	0	1673500
1581	Q7ZVF3	>sp|Q7ZVF3|DHSA_DANRE Succinate dehydrogenase [ubiquinone] flavoprotein subunit, mitochondrial OS=Danio rerio GN=sdha PE=2 SV=2		3	3	3	2	1	2	2	2	2	2	2	1	3	2	0	0	0	2	0	0	0	0	2	3	1				392810	192080	0	454450	637970	191270	102040	270940	249280	0	72358	0	0	0	0	103680	0	0
1635	Q90Z00;F1QWQ8	>sp|Q90Z00|FGR1A_DANRE Basic fibroblast growth factor receptor 1-A OS=Danio rerio GN=fgfr1a PE=1 SV=2		3	1	1	1	1	0	1	2	2	3	1	1	2	1	2	3	0	2	1	2	0	1	1	0	1				0	0	0	0	0	0	0	164700	0	0	0	0	0	0	0	0	0	480690
1647	Q9I8V0	>sp|Q9I8V0|PRV2_DANRE Parvalbumin-2 OS=Danio rerio GN=pvalb2 PE=2 SV=3		3	3	0	0	0	2	1	2	2	1	0	0	0	1	3	3	0	0	0	3	3	2	0	0	0				0	0	0	54596	0	54173	51094	0	0	0	0	0	47938	56464	0	0	0	184430
1649	Q9I8X3;B7ZVT9;Q90413;F1QPA0;F1QHL9	>sp|Q9I8X3|FGFR3_DANRE Fibroblast growth factor receptor 3 OS=Danio rerio GN=fgfr3 PE=2 SV=1;>tr|B7ZVT9|B7ZVT9_DANRE Fibroblast growth factor receptor 4 OS=Danio rerio GN=fgfr4 PE=2 SV=1;>sp|Q90413|FGFR4_DANRE Fibroblast growth factor receptor 4 OS=Danio r		3	1	2	2	2	1	1	1	2	3	2	1	2	1	2	3	1	1	0	1	0	0	0	0	0				0	0	0	0	0	0	0	0	0	0	0	0	0	0	59389	0	0	0
1652	Q9MIY1	>sp|Q9MIY1|NU4M_DANRE NADH-ubiquinone oxidoreductase chain 4 OS=Danio rerio GN=mt-nd4 PE=3 SV=1		3	3	1	1	2	1	1	1	2	3	2	0	1	2	2	3	2	0	0	0	1	0	2	2	1				0	0	467370	0	0	0	0	0	475640	0	0	0	0	0	0	0	0	0
1659	Q9PTH3	>sp|Q9PTH3|IBP2A_DANRE Insulin-like growth factor-binding protein 2-A OS=Danio rerio GN=igfbp2a PE=1 SV=1		3	3	0	0	0	2	2	1	2	2	2	2	2	2	2	2	2	2	2	2	2	2	2	2	1				0	0	0	0	122390	0	416730	213750	193040	667850	1761600	508560	2677300	2017300	202000	443800	751100	722620
18	A2AVJ4	>tr|A2AVJ4|A2AVJ4_DANRE Novel protein similar to bone morphogenetic protein 3 (Osteogenic) (BMP3) OS=Danio rerio GN=bmp3 PE=3 SV=1		3	3	1	0	1	3	3	3	0	0	0	2	2	2	2	2	0	0	0	2	1	1	1	1	1				0	0	0	679180	346280	671840	0	0	0	574700	341240	302070	457390	392430	0	0	0	349630
43	A2CEN1	>tr|A2CEN1|A2CEN1_DANRE Novel protein (Zgc:103659) OS=Danio rerio GN=CH211-145O7.7 PE=4 SV=1		3	2	0	0	0	3	3	3	0	0	0	2	3	3	1	0	0	0	0	1	2	0	1	1	0				0	0	0	1805500	1080100	1021200	0	0	0	133990	89884	123850	0	0	0	0	0	0
54	A3KPG7	>tr|A3KPG7|A3KPG7_DANRE Novel pentaxin family domain containing protein OS=Danio rerio GN=si:ch211-234p6.14 PE=4 SV=1		3	3	0	0	0	3	3	3	0	0	1	0	0	1	1	0	0	0	1	0	2	1	0	0	0				0	0	0	438310	291800	828940	0	0	0	0	0	0	0	0	0	0	0	0
68	A4IG53	>tr|A4IG53|A4IG53_DANRE Si:dkey-13a21.15 protein OS=Danio rerio GN=si:dkey-13a21.15 PE=2 SV=1		3	3	3	3	3	1	2	0	0	2	1	0	0	1	2	0	0	1	0	0	1	0	0	0	0				647390	174050	868740	0	61781	0	0	98426	0	0	0	0	37486	0	0	0	0	0
52	A6NA21;A3KP36	>tr|A6NA21|A6NA21_DANRE Polymerase I and transcript release factor OS=Danio rerio GN=ptrfb PE=2 SV=1;>tr|A3KP36|A3KP36_DANRE Ptrf protein OS=Danio rerio GN=ptrfb PE=2 SV=1		3	3	0	0	0	2	1	1	1	2	0	3	3	2	2	1	1	1	0	3	0	2	3	2	3				0	0	0	233750	0	0	0	391080	0	2849800	4404300	2455600	255880	0	0	0	0	635220
100	A7E2L0	>tr|A7E2L0|A7E2L0_DANRE Dad1 protein OS=Danio rerio GN=dad1 PE=4 SV=1		3	3	3	3	3	3	2	3	3	3	2	3	3	3	3	3	1	1	0	0	1	0	0	1	1				14198000	11010000	10231000	1514900	3079800	1071500	871950	1807100	3971600	659980	568900	730570	1110600	1547800	0	0	0	0
101	A7E2N2;Q5XTN0	>tr|A7E2N2|A7E2N2_DANRE Crygmx protein OS=Danio rerio GN=crygmx PE=2 SV=1;>tr|Q5XTN0|Q5XTN0_DANRE Crystallin, gamma MX OS=Danio rerio GN=crygmx PE=2 SV=1		3	3	2	3	3	0	0	0	0	1	0	0	0	0	0	0	0	0	0	0	0	0	0	0	0				6541300	3460700	4728600	0	0	0	0	0	0	0	0	0	0	0	0	0	0	0
120	A8E5J4;Q9W6A8	>tr|A8E5J4|A8E5J4_DANRE Opsin 1 (Cone pigments), short-wave-sensitive 2 OS=Danio rerio GN=opn1sw2 PE=2 SV=1;>sp|Q9W6A8|OP1S2_DANRE Opsin-1, short-wave-sensitive 2 OS=Danio rerio GN=opn1sw2 PE=1 SV=1		3	3	2	2	3	0	0	0	0	0	0	0	0	0	0	0	0	0	0	0	0	0	0	0	0				16170000	11236000	14361000	0	0	0	0	0	0	0	0	0	0	0	0	0	0	0
125	A8E7E4	>tr|A8E7E4|A8E7E4_DANRE Novel protein containing multiple sushi domains (SCR repeat) (Zgc:101554) OS=Danio rerio GN=CH211-207O17.6 PE=4 SV=1		3	3	0	0	0	3	3	3	2	3	3	3	3	3	3	3	1	0	0	0	0	0	0	0	0				0	0	0	817830	0	1302200	0	0	0	808300	570660	386870	0	0	0	0	0	0
135	A8WFU6	>tr|A8WFU6|A8WFU6_DANRE Uncharacterized protein OS=Danio rerio GN=zgc:171630 PE=2 SV=1		3	3	2	2	2	3	2	3	2	2	2	2	2	2	2	1	1	2	0	1	0	1	2	2	0				144200	192470	164490	302750	420570	354920	496650	550990	217300	138560	131830	245100	130360	0	0	84085	0	0
153	B0R0F7	>tr|B0R0F7|B0R0F7_DANRE Cardiac myosin light chain-1 OS=Danio rerio GN=cmlc1 PE=4 SV=1		3	2	0	0	0	2	1	2	2	2	2	1	1	1	0	0	0	0	0	0	0	0	1	0	0				0	0	0	0	0	0	796700	821220	1616000	0	0	0	0	0	0	0	0	0
162	B0R1B8;E7F8N7	>tr|B0R1B8|B0R1B8_DANRE Novel protein similar to H.Sapiens neurofilament, light polypeptide 68kDa (NEFL, zgc:136626) OS=Danio rerio GN=nefl PE=3 SV=1;>tr|E7F8N7|E7F8N7_DANRE Uncharacterized protein OS=Danio rerio GN=nefl PE=3 SV=1		3	2	1	1	0	1	2	2	1	1	1	2	3	2	1	1	2	0	0	2	1	2	0	0	0				0	0	0	0	0	0	0	0	0	0	0	0	0	0	0	0	0	0
167	B0S5B9	>tr|B0S5B9|B0S5B9_DANRE Novel protein similar to vertebrate synaptophysin (SYP) OS=Danio rerio GN=sypa PE=4 SV=1		3	3	3	3	3	2	1	2	2	3	3	0	1	2	0	0	1	1	0	0	0	0	0	0	0				420930	438400	630710	292550	0	211690	0	514530	866350	0	0	249110	0	0	0	0	0	0
172	B0S5K4;P58239;B0S5K5	>tr|B0S5K4|B0S5K4_DANRE Leukocyte cell derived chemotaxin 1 OS=Danio rerio GN=lect1 PE=4 SV=1;>sp|P58239|LECT1_DANRE Leukocyte cell-derived chemotaxin 1 OS=Danio rerio GN=lect1 PE=2 SV=1;>tr|B0S5K5|B0S5K5_DANRE Leukocyte cell derived chemotaxin 1 OS=Danio		3	3	2	2	2	3	3	3	2	3	3	2	2	2	3	2	2	0	1	1	2	1	0	0	2				65815000	96683000	123210000	34962000	71066000	100780000	154520000	97865000	28153000	10746000	5154200	8202100	8082500	8156100	3833700	0	0	0
196	B0UXH5;Q5KQT9	>tr|B0UXH5|B0UXH5_DANRE Angiopoietin-like 2 OS=Danio rerio GN=angptl2 PE=4 SV=1;>tr|Q5KQT9|Q5KQT9_DANRE Angiopoietin-like 2 OS=Danio rerio GN=angptl2 PE=2 SV=1		3	2	0	0	0	1	1	1	1	2	0	1	2	2	2	2	0	1	2	2	3	1	1	2	2				0	0	0	0	0	0	0	171250	0	0	204810	199040	1010600	530000	0	0	436560	361580
198	B0UXR7	>tr|B0UXR7|B0UXR7_DANRE Novel protein similar to vertebrate olfactomedin-like 2A (OLFML2A) OS=Danio rerio GN=olfml2a PE=4 SV=1		3	3	0	0	0	0	0	0	1	1	1	2	1	1	1	1	3	2	2	3	3	3	1	1	2				0	0	0	0	0	0	0	0	0	236230	0	0	0	0	742160	1429700	1045200	2608700
231	B3DJN6;O57460	>tr|B3DJN6|B3DJN6_DANRE Tolloid-like 1 OS=Danio rerio GN=tll1 PE=2 SV=1;>sp|O57460|TLL1_DANRE Dorsal-ventral patterning tolloid-like protein 1 OS=Danio rerio GN=tll1 PE=2 SV=1		3	1	1	1	1	1	2	2	1	1	1	1	1	2	2	3	1	1	0	2	2	2	1	0	1				0	0	0	0	0	0	0	0	0	0	0	0	0	0	0	0	0	25496
237	B5M4A7;F1QTR1;E7F0B2	>tr|B5M4A7|B5M4A7_DANRE BetaA1c-crystallin OS=Danio rerio GN=cryba1c PE=2 SV=1;>tr|F1QTR1|F1QTR1_DANRE Uncharacterized protein OS=Danio rerio GN=zgc:101859 PE=4 SV=1;>tr|E7F0B2|E7F0B2_DANRE Uncharacterized protein OS=Danio rerio GN=OTTDARG00000021904 PE=4		3	2	3	3	2	1	1	1	1	2	1	0	0	1	1	1	0	1	0	0	0	0	0	0	0				3415400	7183300	0	0	0	0	0	0	0	0	0	0	0	0	0	0	0	0
254	B8A481;Q6PBY1	>tr|B8A481|B8A481_DANRE Ribosomal protein S3A OS=Danio rerio GN=rps3a PE=3 SV=1;>sp|Q6PBY1|RS3A_DANRE 40S ribosomal protein S3a OS=Danio rerio GN=rps3a PE=2 SV=3		3	3	2	2	2	2	1	2	2	3	1	3	2	2	2	1	1	0	1	0	2	0	1	1	1				3735300	3486800	0	0	0	0	0	5293500	0	2808600	2618600	2607700	1944800	0	0	0	0	0
270	B8A5K2	>tr|B8A5K2|B8A5K2_DANRE Novel protein similar to H.sapiens ITGA6, integrin, alpha 6 (ITGA6, zgc:113088) OS=Danio rerio GN=itga6b PE=3 SV=1		3	3	0	0	0	3	3	2	2	3	0	1	3	3	3	2	0	0	0	0	0	1	0	0	0				0	0	0	229110	119830	147410	95160	106370	0	0	91810	191520	158060	142290	0	0	0	0
278	B8JHR1;Q9DGK4;E7F8Y5;B8JHR2;E9QIY7	>tr|B8JHR1|B8JHR1_DANRE Translationally controlled tumor protein OS=Danio rerio GN=tpt1 PE=4 SV=1;>sp|Q9DGK4|TCTP_DANRE Translationally-controlled tumor protein homolog OS=Danio rerio GN=tpt1 PE=2 SV=1;>tr|E7F8Y5|E7F8Y5_DANRE Uncharacterized protein OS=Dan		3	3	0	0	0	2	2	2	3	3	2	3	3	3	3	3	1	2	2	2	1	2	2	2	2				0	0	0	308240	77732	273160	647160	218440	125340	1106600	550530	481880	675860	868110	0	247630	295940	1529500
283	B8JIB4	>tr|B8JIB4|B8JIB4_DANRE Novel protein similar to glutamyl aminopeptidase (Aminopeptidase A) (ENPEP) OS=Danio rerio GN=enpep PE=4 SV=1		3	3	0	0	0	2	3	2	0	1	1	2	0	1	1	1	0	1	0	0	1	0	1	0	0				0	0	0	237650	202720	353460	0	0	0	25048	0	0	0	0	0	0	0	0
308	B8JM11	>tr|B8JM11|B8JM11_DANRE Novel protein (Zgc:110304) OS=Danio rerio GN=CH73-105B23.2 PE=4 SV=1		3	3	1	1	1	2	2	1	2	2	2	0	1	1	1	2	2	2	1	0	0	0	0	0	0				0	0	0	574730	677540	0	832700	1003800	3612800	0	0	0	0	0	0	0	0	0
316	C1IHU8;E9QGA4	>tr|C1IHU8|C1IHU8_DANRE Intelectin 1 OS=Danio rerio GN=itln1 PE=2 SV=1;>tr|E9QGA4|E9QGA4_DANRE Uncharacterized protein OS=Danio rerio GN=itln1 PE=4 SV=1		3	3	1	1	0	2	2	2	3	3	2	1	1	1	0	0	1	1	0	0	0	0	0	0	0				0	0	0	404270	224590	194330	548460	950030	325930	0	0	0	0	0	0	0	0	0
350	D3YGT6	>tr|D3YGT6|D3YGT6_DANRE Ifitm3 OS=Danio rerio GN=wu:fa95e04 PE=2 SV=1		3	3	3	3	3	3	3	1	3	3	3	3	3	3	3	3	3	3	2	3	3	3	1	2	3				18561000	25155000	20807000	1386700	2644700	0	13739000	17370000	15867000	6933500	12273000	20331000	87208000	129510000	9048100	1495200	3675900	2284300
358	E7EY07	>tr|E7EY07|E7EY07_DANRE Uncharacterized protein OS=Danio rerio GN=CU929133.1 PE=4 SV=1		3	3	0	0	0	2	1	1	0	1	1	2	0	1	1	2	2	2	2	2	3	3	3	2	3				0	0	0	382240	0	0	0	0	0	137060	0	0	0	114450	234580	375160	166050	722090
363	E7EYJ8	>tr|E7EYJ8|E7EYJ8_DANRE Uncharacterized protein OS=Danio rerio GN=CU467885.3 PE=4 SV=1		3	2	0	0	0	0	0	0	1	0	0	1	1	1	0	0	1	2	1	3	1	2	3	3	2				0	0	0	0	0	0	0	0	0	0	0	0	0	0	0	0	0	107360
365	E7EYM2;F1Q6K4;Q5G872;F1R0I7	>tr|E7EYM2|E7EYM2_DANRE Uncharacterized protein OS=Danio rerio GN=CT573393.1 PE=4 SV=1;>tr|F1Q6K4|F1Q6K4_DANRE Uncharacterized protein OS=Danio rerio GN=scube2 PE=4 SV=1;>sp|Q5G872|SCUB2_DANRE Signal peptide, CUB and EGF-like domain-containing protein 2 OS		3	3	0	0	0	3	3	2	0	1	1	2	2	2	1	0	0	0	0	2	3	1	0	0	0				0	0	0	320990	243850	769050	0	0	0	838410	0	342230	0	0	0	0	0	0
368	E7EZ90;Q6DHR6	>tr|E7EZ90|E7EZ90_DANRE Uncharacterized protein OS=Danio rerio GN=THOP1 PE=3 SV=1;>tr|Q6DHR6|Q6DHR6_DANRE Uncharacterized protein OS=Danio rerio GN=THOP1 PE=2 SV=1		3	3	3	3	2	0	0	1	0	0	0	0	0	0	0	0	0	0	0	0	0	0	0	0	0				104610	965950	73701	0	0	0	0	0	0	0	0	0	0	0	0	0	0	0
371	E7EZE2	>tr|E7EZE2|E7EZE2_DANRE Uncharacterized protein OS=Danio rerio GN=OTTDARG00000022263 PE=4 SV=1		3	2	1	1	1	3	3	3	3	3	3	2	3	3	2	2	1	1	1	0	1	1	1	1	1				0	0	0	98358	81040	98988	0	288250	256180	0	73859	0	0	0	0	0	0	0
383	E7F131;E9QGG9;F1R8B5	>tr|E7F131|E7F131_DANRE Uncharacterized protein OS=Danio rerio GN=OTTDARG00000031732 PE=4 SV=1;>tr|E9QGG9|E9QGG9_DANRE Uncharacterized protein OS=Danio rerio GN=tfr1b PE=4 SV=1;>tr|F1R8B5|F1R8B5_DANRE Uncharacterized protein OS=Danio rerio GN=CT476804.1 PE		3	3	1	1	1	1	2	1	1	1	1	1	1	2	1	1	0	1	0	1	2	1	1	0	0				0	0	0	0	0	0	0	0	0	0	343050	0	0	0	0	0	0	0
423	E7F463;Q6DHC4	>tr|E7F463|E7F463_DANRE Uncharacterized protein OS=Danio rerio GN=OTTDARG00000021042 PE=4 SV=1;>tr|Q6DHC4|Q6DHC4_DANRE Complement component bfb OS=Danio rerio GN=bfb PE=2 SV=1		3	1	1	1	1	3	3	3	2	1	2	3	3	3	3	3	2	3	2	3	2	3	3	3	2				0	0	0	0	0	0	0	0	0	0	0	0	0	0	0	0	0	0
110	E7F4H7;Q58EP8;A8DZD1	>tr|E7F4H7|E7F4H7_DANRE Uncharacterized protein OS=Danio rerio GN=OTTDARG00000011628 PE=4 SV=1;>tr|Q58EP8|Q58EP8_DANRE Uncharacterized protein OS=Danio rerio GN=zgc:113232 PE=2 SV=1;>tr|A8DZD1|A8DZD1_DANRE Novel protein (Zgc:113232) OS=Danio rerio GN=CH211		3	3	1	1	2	2	2	2	0	1	0	1	1	2	2	2	0	0	0	1	1	1	1	1	1				0	0	0	56486000	68622000	6961100	0	0	0	0	0	0	0	0	0	0	0	0
458	E7F7N0	>tr|E7F7N0|E7F7N0_DANRE Uncharacterized protein OS=Danio rerio GN=CABZ01100267.1 PE=4 SV=1		3	3	1	0	0	3	3	3	0	1	0	0	0	0	0	0	0	0	0	0	1	0	0	0	0				0	0	0	693340	418600	1855700	0	0	0	0	0	0	0	0	0	0	0	0
486	E7FAB7	>tr|E7FAB7|E7FAB7_DANRE Uncharacterized protein OS=Danio rerio GN=AL844587.4 PE=4 SV=1		3	2	2	0	1	1	2	2	3	2	0	1	2	1	2	2	1	1	2	2	3	3	2	3	1				0	0	0	0	0	0	248520	0	0	0	0	0	0	0	0	0	0	0
500	E7FB76	>tr|E7FB76|E7FB76_DANRE Uncharacterized protein OS=Danio rerio GN=CABZ01044301.1 PE=4 SV=1		3	3	0	0	0	2	2	2	0	0	0	1	2	3	3	2	1	1	0	0	1	1	1	1	1				0	0	0	571090	794280	780400	0	0	0	0	852640	705600	1193600	0	0	0	0	0
513	E7FCF1;E7EXU0	>tr|E7FCF1|E7FCF1_DANRE Uncharacterized protein OS=Danio rerio GN=col5a3 PE=4 SV=1;>tr|E7EXU0|E7EXU0_DANRE Uncharacterized protein OS=Danio rerio GN=col5a3 PE=4 SV=1		3	3	0	0	0	0	0	0	2	2	1	3	2	3	3	2	0	0	0	1	0	1	1	1	1				0	0	0	0	0	0	767730	347540	0	617730	808480	690280	1205100	1362300	0	0	0	0
514	E7FCH6	>tr|E7FCH6|E7FCH6_DANRE Uncharacterized protein OS=Danio rerio GN=CR558302.3 PE=4 SV=1		3	3	0	1	0	0	0	1	3	3	3	3	3	2	2	2	3	3	3	3	3	3	2	2	3				0	0	0	0	0	0	765310	556520	1028500	288920	276210	189160	170730	190660	5461800	994090	567170	1033800
546	E7FFA8	>tr|E7FFA8|E7FFA8_DANRE Uncharacterized protein OS=Danio rerio GN=CABZ01115154.1 PE=4 SV=1		3	2	0	0	0	1	1	1	1	1	2	1	2	1	0	1	0	1	1	0	2	1	2	1	0				0	0	0	0	0	0	0	0	0	0	0	0	0	0	0	0	0	0
275	E7FH47;B8A617;F1QX99;F1Q857;F1QWD7;F1QGZ7;F1QYL0;F1R7Z6;F1REA5;F1R942;F1REG8;F1Q918;F1RA93;B8JIV9;F1QNN6;F1R1Y2;E9QFX7;B8JIW0;F1R4N8;B8A5A7;B8A620;B8A623;B8A629;E9QBA1;E9QDR9;E9QEU0;E9QEU2;E9QF51;E9QHZ3;E7F081;E9QI54;B8A5A8;B8A621;B8A624;B8A630;E9QJ52;E9QJH5;F1QV65;E7F3J5	>tr|E7FH47|E7FH47_DANRE Uncharacterized protein OS=Danio rerio GN=si:dkey-33c12.2 PE=4 SV=1;>tr|B8A617|B8A617_DANRE Novel member of the trypsin family of serine proteases OS=Danio rerio GN=si:dkey-33c12.2 PE=4 SV=1		3	0	0	1	1	3	2	3	3	2	1	2	3	3	2	2	2	2	2	3	2	3	3	2	2				0	0	0	0	0	0	0	0	0	0	0	0	0	0	0	0	0	0
435	E9QHI5;E7F5N6	>tr|E9QHI5|E9QHI5_DANRE Uncharacterized protein OS=Danio rerio GN=itga10 PE=3 SV=1;>tr|E7F5N6|E7F5N6_DANRE Uncharacterized protein OS=Danio rerio GN=itga10 PE=3 SV=1		3	3	3	1	2	2	1	2	1	3	0	0	0	0	0	1	0	0	0	0	1	2	0	1	1				1264100	0	522420	0	0	0	0	264090	0	0	0	0	0	0	0	0	0	0
77	E9QJQ5;A5PMC3	>tr|E9QJQ5|E9QJQ5_DANRE Uncharacterized protein OS=Danio rerio GN=si:dkeyp-110e4.6 PE=4 SV=1;>tr|A5PMC3|A5PMC3_DANRE Novel protein similar to vertebrate phospholipase D family, member 4 (PLD4) OS=Danio rerio GN=si:dkeyp-110e4.6 PE=4 SV=1		3	3	3	3	3	2	2	1	3	3	3	0	1	1	0	1	0	0	0	0	0	0	1	1	0				2410800	1803000	2011200	334500	583200	0	150900	276820	373080	0	0	0	0	0	0	0	0	0
629	F1Q4X3	>tr|F1Q4X3|F1Q4X3_DANRE Uncharacterized protein OS=Danio rerio GN=CU862015.1 PE=3 SV=1		3	1	1	1	2	2	1	1	1	2	1	2	1	2	3	3	2	0	1	1	2	2	1	1	2				0	0	0	0	0	0	0	0	0	0	0	0	0	436570	0	0	0	0
181	F1Q4X9;B0S6B9;Q1L985;F1QT37;E7FFV6	>tr|F1Q4X9|F1Q4X9_DANRE Uncharacterized protein OS=Danio rerio GN=si:dkey-193b15.9 PE=3 SV=1;>tr|B0S6B9|B0S6B9_DANRE Novel protein similar to vertebrate nardilysin (N-arginine dibasic convertase) (NRD1) OS=Danio rerio GN=si:dkey-193b15.9 PE=3 SV=1		3	3	2	2	3	2	0	1	0	0	0	0	0	1	0	0	0	1	0	1	2	0	3	0	0				0	676260	33063	0	0	0	0	0	0	0	0	0	0	0	0	0	0	0
631	F1Q512;Q7ZUS9	>tr|F1Q512|F1Q512_DANRE Uncharacterized protein OS=Danio rerio GN=etfa PE=4 SV=1;>tr|Q7ZUS9|Q7ZUS9_DANRE Electron-transfer-flavoprotein, alpha polypeptide OS=Danio rerio GN=etfa PE=2 SV=1		3	3	0	0	0	1	1	1	2	3	3	3	3	3	3	1	0	2	1	0	2	2	2	2	3				0	0	0	0	0	0	3346600	7009000	6073800	2685000	6385100	4882600	1553400	0	0	2760500	0	0
150	F1Q5L6;F1RBJ8;Q6NWH7;B0JZJ1;F1QBS1;E9QG17	>tr|F1Q5L6|F1Q5L6_DANRE Uncharacterized protein OS=Danio rerio GN=ddx5 PE=3 SV=1;>tr|F1RBJ8|F1RBJ8_DANRE Uncharacterized protein OS=Danio rerio GN=ddx5 PE=3 SV=1;>tr|Q6NWH7|Q6NWH7_DANRE Ddx5 protein OS=Danio rerio GN=ddx5 PE=2 SV=1;>tr|B0JZJ1|B0JZJ1_DANRE		3	2	3	1	3	1	2	1	1	2	2	0	0	1	0	0	0	0	0	0	0	0	0	0	0				214530	0	277400	0	105580	0	0	229910	145570	0	0	0	0	0	0	0	0	0
649	F1Q6M6	>tr|F1Q6M6|F1Q6M6_DANRE Uncharacterized protein OS=Danio rerio GN=adam10b PE=4 SV=1		3	1	1	2	0	3	2	2	1	1	1	2	2	2	2	2	1	0	0	0	0	0	0	0	0				0	0	0	0	0	0	0	0	0	0	0	0	0	147510	0	0	0	0
1679	REV__F1Q6U3	>tr|F1Q6U3|F1Q6U3_DANRE Uncharacterized protein (Fragment) OS=Danio rerio GN=ttnb PE=4 SV=1		3	3	1	1	1	1	2	2	1	0	1	1	0	2	2	1	1	1	0	1	0	1	2	2	2		+		0	0	0	0	0	0	0	0	0	0	0	0	0	0	0	0	0	0
653	F1Q6V0	>tr|F1Q6V0|F1Q6V0_DANRE Uncharacterized protein OS=Danio rerio GN=zgc:114164 PE=4 SV=1		3	2	2	0	1	1	2	1	2	2	2	1	1	1	0	0	1	0	1	0	0	0	1	0	0				127870	0	0	0	0	0	487370	417000	186770	0	0	0	0	0	0	0	0	0
666	F1Q7H9;F1QBG6	>tr|F1Q7H9|F1Q7H9_DANRE Uncharacterized protein OS=Danio rerio GN=zgc:153968 PE=3 SV=1;>tr|F1QBG6|F1QBG6_DANRE Uncharacterized protein OS=Danio rerio GN=zgc:153968 PE=3 SV=1		3	3	0	0	0	3	2	3	2	0	0	1	2	2	0	0	0	1	1	2	1	1	1	2	1				0	0	0	298640	0	810650	0	0	0	0	0	0	0	0	0	0	0	0
679	F1Q883	>tr|F1Q883|F1Q883_DANRE 6-phosphogluconate dehydrogenase, decarboxylating OS=Danio rerio GN=pgd PE=3 SV=1		3	3	2	3	2	0	0	0	0	1	0	0	0	0	0	0	1	0	0	0	0	0	0	0	0				553190	1940400	267530	0	0	0	0	0	0	0	0	0	0	0	0	0	0	0
680	F1Q890;E9QGF2	>tr|F1Q890|F1Q890_DANRE Uncharacterized protein OS=Danio rerio GN=plg PE=3 SV=1;>tr|E9QGF2|E9QGF2_DANRE Uncharacterized protein OS=Danio rerio GN=plg PE=4 SV=1		3	3	0	0	0	1	1	2	2	2	1	3	2	1	2	1	2	0	1	1	1	2	2	1	1				0	0	0	0	0	0	0	0	0	264900	0	0	0	0	0	0	0	0
168	F1Q8S3;B0S5C4	>tr|F1Q8S3|F1Q8S3_DANRE Uncharacterized protein (Fragment) OS=Danio rerio GN=acsl3b PE=4 SV=1;>tr|B0S5C4|B0S5C4_DANRE Novel protein similar to H.sapiens ACSL3, acyl-CoA synthetase long-chain family member 3 (ACSL3) OS=Danio rerio GN=acsl3b PE=4 SV=1		3	2	3	3	3	2	2	2	1	3	3	1	0	2	1	0	0	0	0	0	0	0	0	0	0				1191100	1131500	359540	167470	243910	144360	0	136790	161340	0	0	106720	0	0	0	0	0	0
252	F1Q9M4;B8A445	>tr|F1Q9M4|F1Q9M4_DANRE Uncharacterized protein OS=Danio rerio GN=slc44a1 PE=4 SV=1;>tr|B8A445|B8A445_DANRE Solute carrier family 44, member 1 (Fragment) OS=Danio rerio GN=slc44a1 PE=4 SV=1		3	3	3	2	3	1	3	1	1	2	2	0	0	1	1	2	0	0	0	0	1	0	1	0	0				809900	350860	947700	0	141070	0	0	218830	336740	0	0	0	0	160160	0	0	0	0
698	F1Q9N5;F1QJL1	>tr|F1Q9N5|F1Q9N5_DANRE Uncharacterized protein (Fragment) OS=Danio rerio GN=BX908759.2 PE=4 SV=1		3	3	1	0	1	1	1	2	1	0	0	2	2	2	2	2	1	2	1	2	2	1	2	1	3				0	0	0	0	0	168760	0	0	0	617050	456400	413580	589070	557380	0	484290	0	1802800
700	F1Q9V1;Q6NWK2;Q7ZW98;F1RD00;F1QLI6;A8E7K7	>tr|F1Q9V1|F1Q9V1_DANRE Uncharacterized protein OS=Danio rerio GN=ap2m1b PE=4 SV=1;>sp|Q6NWK2|AP2MA_DANRE AP-2 complex subunit mu-1-A OS=Danio rerio GN=ap2m1a PE=2 SV=1;>sp|Q7ZW98|AP2MB_DANRE AP-2 complex subunit mu-1-B OS=Danio rerio GN=ap2m1b PE=2 SV=1;>		3	3	2	0	1	1	1	1	1	1	1	0	0	0	0	0	0	1	0	0	1	0	0	0	0				0	0	0	0	0	0	0	0	79416	0	0	0	0	0	0	0	0	0
708	F1QAL9	>tr|F1QAL9|F1QAL9_DANRE Uncharacterized protein (Fragment) OS=Danio rerio GN=emid1 PE=4 SV=1		3	2	2	2	2	2	2	2	2	2	2	2	2	2	2	2	2	2	2	2	2	2	2	3	2				125720	46213	125260	271160	66757	284940	542220	493850	94893	359530	2575800	1042700	2733300	6277500	230300	1616600	939090	287110
715	F1QB54;Q6P3L1;B8JLJ5;Q6TGY6;B8K0D5;B8K0D6	>tr|F1QB54|F1QB54_DANRE Uncharacterized protein OS=Danio rerio GN=pabpc1a PE=4 SV=1;>tr|Q6P3L1|Q6P3L1_DANRE Poly A binding protein, cytoplasmic 1 b OS=Danio rerio GN=pabpc1b PE=2 SV=1;>tr|B8JLJ5|B8JLJ5_DANRE Poly A binding protein, cytoplasmic 1 b (Fragmen		3	3	1	1	1	0	1	0	1	1	0	2	2	3	1	0	0	1	0	0	0	0	1	0	1				0	0	0	0	0	0	0	0	0	200830	0	113260	0	0	0	0	0	0
720	F1QBE4;Q803G5	>tr|F1QBE4|F1QBE4_DANRE Uncharacterized protein OS=Danio rerio GN=samm50 PE=4 SV=1;>sp|Q803G5|SAM5A_DANRE Sorting and assembly machinery component 50 homolog A OS=Danio rerio GN=samm50a PE=2 SV=1		3	2	3	2	3	3	3	3	1	3	3	1	1	3	2	1	1	2	0	0	0	0	2	1	1				874530	353660	767100	426320	207390	196430	0	202970	106490	0	0	91038	60014	0	0	52833	0	0
721	F1QBE9	>tr|F1QBE9|F1QBE9_DANRE Uncharacterized protein OS=Danio rerio GN=AL840638.1 PE=4 SV=1		3	3	0	0	0	0	2	1	3	3	2	1	1	1	1	2	2	3	3	2	3	2	3	3	3				0	0	0	0	21597	0	857270	225470	284130	0	0	0	0	326040	5259300	4848700	5134100	228840
571	F1QBS3;E9QJH3;E9QC29	>tr|F1QBS3|F1QBS3_DANRE Uncharacterized protein OS=Danio rerio GN=nsdhl PE=3 SV=1;>tr|E9QJH3|E9QJH3_DANRE Uncharacterized protein OS=Danio rerio GN=nsdhl PE=3 SV=1;>tr|E9QC29|E9QC29_DANRE Uncharacterized protein OS=Danio rerio GN=nsdhl PE=3 SV=1		3	3	2	3	3	2	3	2	1	1	1	0	1	1	1	1	0	0	0	0	0	0	0	0	0				0	948970	544100	693900	533780	633860	0	0	0	0	0	0	0	0	0	0	0	0
730	F1QCB6	>tr|F1QCB6|F1QCB6_DANRE Uncharacterized protein OS=Danio rerio GN=scpp1 PE=4 SV=1		3	3	0	1	1	0	0	1	1	1	1	2	1	1	2	2	1	2	1	3	3	2	1	2	3				0	0	0	0	0	0	0	0	0	16604000	0	0	4081600	5754100	0	0	0	26196000
739	F1QCJ3;E9QJK4;F1R679;F1QNW7;F1R8X7;F1QNN8;F1Q936;A8E7M8;F1QHU1	>tr|F1QCJ3|F1QCJ3_DANRE Uncharacterized protein OS=Danio rerio GN=zgc:153440 PE=4 SV=1;>tr|E9QJK4|E9QJK4_DANRE Uncharacterized protein OS=Danio rerio GN=zgc:153440 PE=4 SV=1		3	3	2	2	2	2	3	1	1	2	2	1	1	1	1	1	1	0	0	0	1	0	0	0	0				2282100	1885800	1364400	2663500	4738000	0	0	924530	942480	0	0	0	0	0	0	0	0	0
747	F1QCW3;B8A539;Q6DG78;F1Q4M2	>tr|F1QCW3|F1QCW3_DANRE Uncharacterized protein (Fragment) OS=Danio rerio GN=wu:fd55e03 PE=3 SV=1		3	3	2	2	2	3	3	3	2	2	3	0	1	2	1	0	0	0	0	0	0	0	1	0	0				0	0	0	396250	308760	396220	0	0	617520	0	0	0	0	0	0	0	0	0
752	F1QDE7;A1L1F4;F1R1D0;F1RC71;E9QD11	>tr|F1QDE7|F1QDE7_DANRE Uncharacterized protein OS=Danio rerio GN=pds5a PE=4 SV=1;>sp|A1L1F4|PDS5A_DANRE Sister chromatid cohesion protein PDS5 homolog A OS=Danio rerio GN=pds5a PE=2 SV=1;>tr|F1R1D0|F1R1D0_DANRE Uncharacterized protein OS=Danio rerio GN=pd		3	2	2	1	1	0	1	2	1	1	2	0	0	1	1	2	0	1	0	0	0	0	0	0	0				284150	0	0	0	0	71494	0	0	53631	0	0	0	0	0	0	0	0	0
266	F1QEB4;B8A5B8;F1QYC1;B8A5B7;E7FB41;E9QCL4	>tr|F1QEB4|F1QEB4_DANRE Uncharacterized protein OS=Danio rerio GN=ssrp1a PE=4 SV=1;>tr|B8A5B8|B8A5B8_DANRE Structure specific recognition protein 1b (Fragment) OS=Danio rerio GN=ssrp1b PE=4 SV=1;>tr|F1QYC1|F1QYC1_DANRE Uncharacterized protein OS=Danio reri		3	3	3	3	3	3	3	2	3	3	3	2	2	3	3	3	0	0	0	1	0	1	1	1	0				321650	466340	454610	216850	0	0	286520	291060	321020	0	0	0	168620	231360	0	0	0	0
771	F1QEL0	>tr|F1QEL0|F1QEL0_DANRE Uncharacterized protein (Fragment) OS=Danio rerio GN=CU694451.1 PE=4 SV=1		3	3	3	3	3	2	2	1	3	3	3	1	2	1	1	1	0	1	0	0	0	0	0	0	0				3290000	3322900	3444500	1053100	708090	0	511020	888860	881750	0	456590	0	0	0	0	0	0	0
741	F1QEX9;F1QHJ8;F1QCK4;F1R7G0;B0V3H8	>tr|F1QEX9|F1QEX9_DANRE Uncharacterized protein (Fragment) OS=Danio rerio GN=ryr1b PE=4 SV=1;>tr|F1QHJ8|F1QHJ8_DANRE Uncharacterized protein OS=Danio rerio GN=ryr1a PE=4 SV=1;>tr|F1QCK4|F1QCK4_DANRE Uncharacterized protein OS=Danio rerio GN=ryr1a PE=4 SV=1		3	3	0	0	0	2	3	3	1	2	2	0	2	2	0	0	2	2	0	0	0	0	1	0	0				0	0	0	96097	168140	179360	0	0	0	0	88699	0	0	0	0	0	0	0
788	F1QFU5	>tr|F1QFU5|F1QFU5_DANRE Uncharacterized protein OS=Danio rerio GN=ppig PE=4 SV=1		3	3	0	0	0	2	1	1	0	1	0	1	1	0	0	0	0	0	0	0	0	0	0	0	0				0	0	0	167460	0	0	0	0	0	0	0	0	0	0	0	0	0	0
794	F1QG52	>tr|F1QG52|F1QG52_DANRE Uncharacterized protein OS=Danio rerio GN=zgc:113307 PE=4 SV=1		3	3	0	1	1	2	1	2	1	2	1	3	1	2	1	1	2	2	1	2	2	2	1	2	2				0	0	0	233380	0	244970	0	0	0	291620	0	0	0	0	0	448050	0	843480
802	F1QGP8;E7EZP6	>tr|F1QGP8|F1QGP8_DANRE Uncharacterized protein OS=Danio rerio GN=hmgb3a PE=4 SV=1		3	2	2	2	2	2	2	3	1	0	1	1	1	1	1	0	0	1	0	0	0	0	0	2	0				429200	0	0	342800	164790	0	0	0	0	0	0	0	0	0	0	0	0	0
566	F1QHP7;E9QBD0	>tr|F1QHP7|F1QHP7_DANRE Uncharacterized protein (Fragment) OS=Danio rerio GN=dclk1 PE=4 SV=1;>tr|E9QBD0|E9QBD0_DANRE Uncharacterized protein OS=Danio rerio GN=dclk1 PE=4 SV=1		3	3	3	2	2	0	0	0	0	0	0	0	0	0	0	0	0	0	0	0	0	0	0	0	0				721900	1048400	1084400	0	0	0	0	0	0	0	0	0	0	0	0	0	0	0
822	F1QHW0	>tr|F1QHW0|F1QHW0_DANRE Uncharacterized protein OS=Danio rerio GN=cyp20a1 PE=4 SV=1		3	3	3	3	3	1	2	2	0	1	0	0	1	0	0	0	0	0	0	0	0	0	0	0	0				2081400	1350300	795360	0	657260	380750	0	0	0	0	0	0	0	0	0	0	0	0
836	F1QJ56	>tr|F1QJ56|F1QJ56_DANRE Uncharacterized protein OS=Danio rerio GN=ndufb10 PE=4 SV=1		3	3	0	0	1	2	1	2	2	3	2	2	2	2	2	1	1	2	2	2	0	0	3	3	2				0	0	0	0	0	1191200	0	815770	0	0	0	0	0	0	0	730460	0	150610
638	F1QJ90;F1Q5L1	>tr|F1QJ90|F1QJ90_DANRE Uncharacterized protein (Fragment) OS=Danio rerio GN=si:dkey-78l4.6 PE=3 SV=1;>tr|F1Q5L1|F1Q5L1_DANRE Uncharacterized protein OS=Danio rerio GN=si:dkey-78l4.6 PE=3 SV=1		3	3	0	0	0	0	0	0	1	1	0	1	0	0	0	0	0	1	0	1	0	0	1	2	2				0	0	0	0	0	0	0	0	0	0	0	0	0	0	0	0	0	0
841	F1QJC1	>tr|F1QJC1|F1QJC1_DANRE Uncharacterized protein OS=Danio rerio GN=dhrs9 PE=3 SV=1		3	3	2	2	2	3	3	3	2	3	3	0	2	2	0	0	1	0	0	0	1	0	0	0	0				207270	231150	211330	199210	509980	180690	0	235650	367980	0	0	0	0	0	0	0	0	0
845	F1QJE0	>tr|F1QJE0|F1QJE0_DANRE Uncharacterized protein OS=Danio rerio GN=uqcrc2a PE=3 SV=1		3	3	1	1	1	2	1	1	1	1	2	1	1	2	2	0	1	3	1	0	1	1	3	3	3				0	0	0	0	0	0	0	0	0	0	0	288970	0	0	0	311000	0	0
865	F1QKL1;Q8JHW2	>tr|F1QKL1|F1QKL1_DANRE Uncharacterized protein OS=Danio rerio GN=thbs3a PE=4 SV=1;>sp|Q8JHW2|TSP3A_DANRE Thrombospondin-3a OS=Danio rerio GN=thbs3a PE=2 SV=2		3	3	0	1	0	0	0	0	3	2	2	2	1	2	3	3	1	0	1	2	3	2	2	1	2				0	0	0	0	0	0	142660	214630	174200	127180	0	116210	763340	792290	0	0	0	138080
867	F1QKS4	>tr|F1QKS4|F1QKS4_DANRE Uncharacterized protein OS=Danio rerio GN=canx PE=3 SV=1		3	3	2	2	1	2	2	2	3	3	3	2	1	3	2	2	0	0	0	0	2	0	2	0	0				699480	310160	0	432920	259200	436580	268870	354810	349090	0	0	313180	0	0	0	0	0	0
876	F1QM90	>tr|F1QM90|F1QM90_DANRE Uncharacterized protein OS=Danio rerio GN=gc PE=4 SV=1		3	3	1	1	1	3	2	3	3	2	2	3	3	3	3	3	1	2	2	3	3	3	1	1	1				0	0	0	1314900	0	0	0	0	0	1609000	1167000	0	0	1026700	0	0	0	0
879	F1QMK6	>tr|F1QMK6|F1QMK6_DANRE Uncharacterized protein OS=Danio rerio GN=zgc:92027 PE=4 SV=1		3	3	1	1	1	2	2	3	0	0	1	0	0	0	0	0	1	1	0	0	1	0	2	1	1				0	0	0	1182600	620270	859580	0	0	0	0	0	0	0	0	0	0	0	0
920	F1QRV5;F1QRB5	>tr|F1QRV5|F1QRV5_DANRE Uncharacterized protein OS=Danio rerio GN=ugt2b6 PE=3 SV=1;>tr|F1QRB5|F1QRB5_DANRE Uncharacterized protein OS=Danio rerio GN=ugt2b6 PE=4 SV=1		3	2	2	2	1	2	3	0	0	1	0	0	0	0	0	0	0	0	0	0	0	0	0	0	0				406200	302310	0	298320	366900	0	0	0	0	0	0	0	0	0	0	0	0	0
921	F1QRW5;F1RCG2	>tr|F1QRW5|F1QRW5_DANRE Uncharacterized protein (Fragment) OS=Danio rerio GN=ptges3b PE=4 SV=1;>tr|F1RCG2|F1RCG2_DANRE Uncharacterized protein (Fragment) OS=Danio rerio GN=FP102169.2 PE=4 SV=1		3	3	1	1	1	3	3	3	3	2	3	3	3	3	3	3	2	2	2	3	3	3	3	2	3				0	0	0	700030	446740	1015800	737690	398880	223560	786370	502250	629520	522170	500330	1459800	1290300	1089300	2092700
927	F1QSB3	>tr|F1QSB3|F1QSB3_DANRE Uncharacterized protein OS=Danio rerio GN=SRPRB PE=4 SV=1		3	3	3	3	2	2	3	2	2	3	3	0	1	0	1	1	0	0	0	0	0	0	1	0	0				2816600	2043300	2654800	768800	466450	691210	220450	416500	394970	0	0	0	0	0	0	0	0	0
948	F1QU55;Q32LQ4	>tr|F1QU55|F1QU55_DANRE Uncharacterized protein OS=Danio rerio GN=bhmt PE=4 SV=1;>sp|Q32LQ4|BHMT1_DANRE Betaine--homocysteine S-methyltransferase 1 OS=Danio rerio GN=bhmt PE=2 SV=1		3	3	2	3	2	1	3	1	2	2	2	2	3	1	1	0	2	2	1	0	2	1	2	2	1				0	4859300	0	0	2970600	0	5761100	8106300	6823400	0	2755800	0	0	0	2758700	6131900	0	0
949	F1QU85	>tr|F1QU85|F1QU85_DANRE Uncharacterized protein OS=Danio rerio GN=si:ch211-14a17.10 PE=4 SV=1		3	3	0	1	0	0	0	0	3	3	1	0	0	0	0	0	2	1	0	0	1	0	0	0	0				0	0	0	0	0	0	409270	156820	0	0	0	0	0	0	117080	0	0	0
950	F1QUE3	>tr|F1QUE3|F1QUE3_DANRE Uncharacterized protein OS=Danio rerio GN=uqcrc1 PE=3 SV=1		3	3	2	2	1	1	2	1	2	2	2	2	1	1	1	1	1	2	0	0	0	1	2	3	2				866750	1079100	0	0	651440	0	729700	1296800	1135200	408170	0	0	0	0	0	1479500	0	0
951	F1QUE7;B8JLX5	>tr|F1QUE7|F1QUE7_DANRE Uncharacterized protein OS=Danio rerio GN=calrl PE=3 SV=1		3	2	1	0	1	2	1	3	2	1	0	1	2	1	1	2	0	1	1	1	3	2	1	1	2				0	0	0	151920	0	35882	0	0	0	0	0	0	0	0	0	0	0	0
890	F1QXT6;F1QNI9	>tr|F1QXT6|F1QXT6_DANRE Calsequestrin OS=Danio rerio GN=zgc:100957 PE=3 SV=1;>tr|F1QNI9|F1QNI9_DANRE Calsequestrin OS=Danio rerio GN=zgc:100957 PE=3 SV=1		3	3	0	0	0	1	1	1	1	1	1	2	2	3	2	1	1	1	2	1	0	1	0	1	1				0	0	0	0	0	0	0	0	0	735940	785450	728530	0	0	0	0	0	0
860	F1QY43;F1QK93	>tr|F1QY43|F1QY43_DANRE Uncharacterized protein (Fragment) OS=Danio rerio GN=psmd1 PE=4 SV=1;>tr|F1QK93|F1QK93_DANRE Uncharacterized protein OS=Danio rerio GN=psmd1 PE=4 SV=1		3	3	1	1	1	2	0	0	3	2	2	3	2	2	1	1	2	2	1	0	2	1	2	2	0				0	0	0	0	0	0	352350	443520	1090000	218560	0	0	0	0	0	0	0	0
998	F1QZA5	>tr|F1QZA5|F1QZA5_DANRE Uncharacterized protein OS=Danio rerio GN=psmd6 PE=4 SV=1		3	3	2	3	2	1	1	0	2	2	2	2	1	1	1	0	1	1	1	1	2	1	0	1	0				599760	486650	486080	0	0	0	225960	181160	318290	116930	0	0	0	0	0	0	0	0
1005	F1R027	>tr|F1R027|F1R027_DANRE Uncharacterized protein (Fragment) OS=Danio rerio GN=pcsk5b PE=4 SV=1		3	3	0	1	0	3	1	2	1	1	1	2	3	2	3	2	0	1	0	0	0	0	1	0	0				0	0	0	147420	0	190490	0	0	0	176380	0	0	344960	0	0	0	0	0
1018	F1R221;E7FDK2;F1QAR7;E7FFC0;A8C984;Q6ZM37;Q1LVF9;F1QMF6;F1QBT7;F1QZ47;E9QIU4;F1RCB8;Q32LV0;E9QB50;A8WG58;E9QBW8;E9QE29;E9QJ70;F1R1H2;Q9DGD9;Q5RHW0;O42376;Q1LVN7;E7F292;A8Y5S6;F1QQ40;F1RAA2;Q6IQ84;Q9DGE2;F1QHF2;F1R202;Q9DGE1;F1RCB7;E9QJ67;E9QBD3;E9QJI8	>tr|F1R221|F1R221_DANRE Uncharacterized protein (Fragment) OS=Danio rerio GN=CABZ01051288.1 PE=4 SV=1;>tr|E7FDK2|E7FDK2_DANRE Uncharacterized protein OS=Danio rerio GN=CR853290.1 PE=4 SV=1		3	3	1	2	2	2	0	0	1	2	1	2	1	2	2	1	2	3	1	2	2	1	2	1	1				0	0	0	0	0	0	0	0	0	916380	0	1414800	0	0	1929700	1952300	0	6337800
1063	F1R5V4	>tr|F1R5V4|F1R5V4_DANRE Uncharacterized protein OS=Danio rerio GN=col4a3 PE=4 SV=1		3	2	3	3	3	2	2	2	2	3	3	1	1	1	1	0	1	2	1	1	1	1	1	0	0				1244500	2184400	1136300	0	0	0	0	2331200	7584400	0	0	0	0	0	0	1168400	0	0
1067	F1R665;Q66HY0	>tr|F1R665|F1R665_DANRE Uncharacterized protein OS=Danio rerio GN=sdprb PE=4 SV=1;>tr|Q66HY0|Q66HY0_DANRE Uncharacterized protein OS=Danio rerio GN=sdprb PE=2 SV=1		3	3	0	0	0	0	1	1	1	0	0	3	3	3	2	1	0	0	0	1	1	2	3	1	1				0	0	0	0	0	0	0	0	0	607490	224490	538700	122530	0	0	0	0	0
1078	F1R6Y6	>tr|F1R6Y6|F1R6Y6_DANRE Uncharacterized protein (Fragment) OS=Danio rerio GN=zgc:136220 PE=4 SV=1		3	3	3	3	3	0	0	0	0	0	0	0	0	0	0	0	0	0	0	0	0	0	0	0	0				5515200	5432700	3601400	0	0	0	0	0	0	0	0	0	0	0	0	0	0	0
757	F1R7K7;F1QDY0	>tr|F1R7K7|F1R7K7_DANRE Uncharacterized protein (Fragment) OS=Danio rerio GN=ANGPTL1 (2 of 2) PE=4 SV=1;>tr|F1QDY0|F1QDY0_DANRE Uncharacterized protein (Fragment) OS=Danio rerio GN=ANGPTL1 (2 of 2) PE=4 SV=1		3	2	0	0	0	0	0	0	2	2	1	1	1	2	1	1	2	2	2	2	3	2	2	1	2				0	0	0	0	0	0	0	127130	0	0	0	0	0	0	208250	0	0	507100
1094	F1R8B4	>tr|F1R8B4|F1R8B4_DANRE Uncharacterized protein (Fragment) OS=Danio rerio GN=gcn1l1 PE=4 SV=1		3	3	1	0	2	1	1	1	1	2	1	1	1	1	1	1	0	1	0	0	1	0	0	0	0				0	0	0	0	0	0	0	136630	0	0	0	0	0	0	0	0	0	0
1106	F1R962;B0S6D0	>tr|F1R962|F1R962_DANRE Uncharacterized protein (Fragment) OS=Danio rerio GN=CU856394.1 PE=4 SV=1		3	3	2	3	3	2	2	2	2	3	2	2	1	2	3	3	1	2	2	2	2	3	1	2	2				164350	241300	299740	74026	59636	64922	152080	242320	212030	88798	0	276610	6962500	4703000	0	691210	130500	149320
1120	F1RA95;F1QSP8	>tr|F1RA95|F1RA95_DANRE Uncharacterized protein OS=Danio rerio GN=zgc:110343 PE=4 SV=1		3	1	3	3	3	1	3	3	3	3	3	3	3	3	3	3	1	0	1	0	2	0	2	0	1				0	0	0	0	0	0	0	0	0	0	0	0	0	0	0	0	0	0
1127	F1RAX4	>tr|F1RAX4|F1RAX4_DANRE Uncharacterized protein OS=Danio rerio GN=stra6 PE=4 SV=1		3	3	3	3	3	0	0	0	0	0	0	0	0	0	0	0	0	0	0	0	1	0	0	0	0				1598200	1726500	1309700	0	0	0	0	0	0	0	0	0	0	0	0	0	0	0
1131	F1RBD0	>tr|F1RBD0|F1RBD0_DANRE Uncharacterized protein OS=Danio rerio GN=lgals2b PE=4 SV=1		3	3	2	2	1	3	3	2	2	2	2	1	1	1	1	1	0	0	0	0	0	0	0	0	0				0	0	0	787460	1240200	1876600	913880	920650	765920	0	0	0	0	0	0	0	0	0
115	F1RCI7;A8E5B7	>tr|F1RCI7|F1RCI7_DANRE Uncharacterized protein OS=Danio rerio GN=ndufb5 PE=4 SV=1;>tr|A8E5B7|A8E5B7_DANRE NADH dehydrogenase (Ubiquinone) 1 beta subcomplex 5 OS=Danio rerio GN=ndufb5 PE=2 SV=1		3	3	1	1	1	1	2	1	1	2	3	0	1	1	2	1	0	0	0	0	0	0	0	0	0				0	1236400	0	0	0	0	0	0	0	0	0	0	0	0	0	0	0	0
703	F1RDV4;F1QAC2;E7EZQ6	>tr|F1RDV4|F1RDV4_DANRE Uncharacterized protein (Fragment) OS=Danio rerio GN=CABZ01081745.1 PE=4 SV=1;>tr|F1QAC2|F1QAC2_DANRE Uncharacterized protein (Fragment) OS=Danio rerio GN=CABZ01081745.1 PE=4 SV=1		3	3	3	2	2	3	3	1	2	3	2	2	2	3	0	2	1	1	0	0	1	1	1	1	0				294930	290620	254070	266710	203810	0	274060	405650	353180	188340	198840	230150	0	171320	0	0	0	0
1160	F1REM3;F1QPG2	>tr|F1REM3|F1REM3_DANRE Uncharacterized protein OS=Danio rerio GN=bmp1a PE=3 SV=1		3	1	2	2	2	2	3	3	2	2	2	2	2	3	2	3	2	2	1	2	3	3	2	1	2				254950	402310	252900	327420	313660	288940	267720	325970	318730	409590	267180	335740	358990	357350	83205	148420	0	250110
1165	F2Z4S3;F2Z4S7;F1QJR9	>tr|F2Z4S3|F2Z4S3_DANRE Uncharacterized protein OS=Danio rerio GN=si:ch211-102c2.6 PE=4 SV=1;>tr|F2Z4S7|F2Z4S7_DANRE Uncharacterized protein OS=Danio rerio GN=si:ch211-102c2.6 PE=4 SV=1		3	3	0	1	0	2	2	2	2	1	2	2	3	1	3	2	1	3	2	3	3	3	1	3	2				0	0	0	299460	266300	0	0	0	0	0	251300	0	312410	323460	0	286580	565960	598150
1182	Q0IJ38	>tr|Q0IJ38|Q0IJ38_DANRE Uncharacterized protein OS=Danio rerio GN=mybpc2a PE=2 SV=1		3	1	0	0	0	0	0	0	2	3	2	0	1	0	0	0	1	2	0	0	1	1	0	0	0				0	0	0	0	0	0	0	0	0	0	0	0	0	0	0	171670	0	0
1187	Q1JPY5	>tr|Q1JPY5|Q1JPY5_DANRE Cytochrome P450, family 51 OS=Danio rerio GN=cyp51 PE=2 SV=1		3	3	3	3	3	3	3	3	2	2	1	0	1	2	0	0	0	0	0	0	0	0	0	1	0				1450400	1353000	1288300	416320	395300	298840	108460	221330	0	0	0	99578	0	0	0	0	0	0
1232	Q24JV1	>tr|Q24JV1|Q24JV1_DANRE Novel protein similar to vertebrate ribosomal protein L32 (RPL32) OS=Danio rerio GN=CH211-257F16.3-001 PE=2 SV=1		3	3	1	1	2	0	1	0	2	2	1	1	2	1	1	1	0	0	0	0	0	1	0	0	1				0	0	0	0	0	0	0	709260	0	0	1318400	0	0	0	0	0	0	0
797	Q24JV6;F1QGA5	>tr|Q24JV6|Q24JV6_DANRE Myosin, light polypeptide 2, regulatory, cardiac, slow OS=Danio rerio GN=myl2 PE=2 SV=1;>tr|F1QGA5|F1QGA5_DANRE Uncharacterized protein (Fragment) OS=Danio rerio GN=myl2 PE=4 SV=1		3	1	0	0	0	1	1	2	3	2	2	0	0	0	0	0	2	3	3	0	0	1	2	2	2				0	0	0	0	0	0	0	0	0	0	0	0	0	0	0	0	0	0
1235	Q24JW4;E7EZY1;B0UYL5	>tr|Q24JW4|Q24JW4_DANRE Flj13639 protein OS=Danio rerio GN=flj13639 PE=2 SV=1		3	3	0	0	0	1	2	1	1	2	2	3	3	3	0	0	1	2	0	0	0	0	0	0	1				0	0	0	0	0	0	0	0	0	282030	0	344950	0	0	0	0	0	0
937	Q4G5W2;Q4G5W0;Q4G5V9;Q66HZ3;F1QT89	>tr|Q4G5W2|Q4G5W2_DANRE Reticulon 4-l OS=Danio rerio GN=rtn4a PE=2 SV=1;>tr|Q4G5W0|Q4G5W0_DANRE Reticulon 4-l(-10/195) OS=Danio rerio GN=rtn4a PE=2 SV=1;>tr|Q4G5V9|Q4G5V9_DANRE Reticulon 4-m OS=Danio rerio GN=rtn4a PE=2 SV=1;>tr|Q66HZ3|Q66HZ3_DANRE Reticul		3	3	2	3	3	2	3	1	1	2	1	0	3	3	2	1	0	0	0	0	0	0	3	0	0				1303600	1260500	1315100	0	754390	0	0	0	0	0	620410	762370	0	0	0	0	0	0
1249	Q4KMC6	>tr|Q4KMC6|Q4KMC6_DANRE C1q and tumor necrosis factor related protein 5 OS=Danio rerio GN=c1qtnf5 PE=2 SV=1		3	3	1	1	1	0	1	0	1	1	0	1	1	0	1	1	0	1	2	1	1	0	1	1	3				0	0	0	0	0	0	0	0	0	0	0	0	0	0	0	0	283700	0
1259	Q4VBV1	>tr|Q4VBV1|Q4VBV1_DANRE Novel protein similar to vertebrate ubiquinol-cytochrome c reductase binding protein (UQCRB) OS=Danio rerio GN=uqcrb PE=2 SV=1		3	3	2	2	1	3	3	3	3	3	3	3	3	3	1	2	3	2	2	1	1	1	3	3	3				366700	235000	0	412020	359430	405370	561100	679740	1353500	241710	232580	327940	0	326680	1376200	776170	336300	0
1274	Q567Y4	>tr|Q567Y4|Q567Y4_DANRE NADH dehydrogenase (Ubiquinone) 1 beta subcomplex, 9 OS=Danio rerio GN=ndufb9 PE=2 SV=1		3	3	1	0	2	2	2	1	2	2	3	1	2	2	2	2	2	1	0	0	0	0	1	1	0				0	0	0	873830	1737500	0	1033500	0	0	0	0	0	0	0	0	0	0	0
1278	Q5BJ17	>tr|Q5BJ17|Q5BJ17_DANRE Elongation factor Tu OS=Danio rerio GN=tufm PE=2 SV=1		3	3	0	1	2	1	1	0	2	2	2	2	1	1	1	1	1	1	0	1	1	0	2	2	2				0	0	0	0	0	0	48378	94475	166590	0	0	0	0	0	0	0	0	0
1282	Q5BL99;Q6PBH4	>tr|Q5BL99|Q5BL99_DANRE Dnl2l protein OS=Danio rerio GN=dnl2l PE=2 SV=1;>tr|Q6PBH4|Q6PBH4_DANRE Dynein, light chain, LC8-type 2 OS=Danio rerio GN=dynll1 PE=2 SV=1		3	3	1	1	2	3	2	3	3	3	3	3	3	3	2	2	1	2	0	3	1	3	3	2	3				0	0	155180	157680	119790	131270	675950	136100	145560	1985700	1359200	1176500	124460	173860	0	177530	0	176000
1310	Q5TZ27;A3KQ92;Q1LX36	>tr|Q5TZ27|Q5TZ27_DANRE Novel protein similar to vertebrate synaptotagmin I (SYT1) OS=Danio rerio GN=syt1a PE=2 SV=1;>tr|A3KQ92|A3KQ92_DANRE Novel protein similar to vertebrate synaptotagmin I (SYT1) OS=Danio rerio GN=syt1b PE=4 SV=1;>tr|Q1LX36|Q1LX36_DANR		3	2	3	3	3	2	1	1	2	2	2	0	0	0	0	0	1	0	0	0	0	0	0	0	0				744270	748720	1933800	274080	0	0	288650	277380	271920	0	0	0	0	0	0	0	0	0
367	Q5TZ76;E7EZ45;E7FEJ8;Q5RG51;Q5TZ85;Q5TZ86;F1QDS9;B3DIC0;F1Q8C3;Q5TZ82;Q5TZ84;Q5TZ75;E7FDA7	>tr|Q5TZ76|Q5TZ76_DANRE Novel protein similar to cytochrome P450, family 2, subfamily J (Zgc:55731) OS=Danio rerio GN=cyp2j25 PE=2 SV=1;>tr|E7EZ45|E7EZ45_DANRE Uncharacterized protein OS=Danio rerio GN=OTTDARG00000005504 PE=3 SV=1;>tr|E7FEJ8|E7FEJ8_DANRE U		3	3	3	3	3	3	3	3	2	3	2	0	1	1	0	0	0	0	0	0	0	0	0	0	0				252840	267980	225840	197910	253260	194770	144380	272390	257180	0	0	0	0	0	0	0	0	0
1318	Q5U3G0	>tr|Q5U3G0|Q5U3G0_DANRE Progesterone receptor membrane component 1 OS=Danio rerio GN=pgrmc1 PE=2 SV=1		3	2	2	2	2	3	3	3	2	2	3	2	2	2	2	2	2	2	1	2	1	2	1	1	2				3115900	2998900	1771500	1597100	1309500	1148200	1013600	1693200	1709700	612430	514560	922990	1382700	561280	128430	415460	0	302080
1322	Q5WQV6	>tr|Q5WQV6|Q5WQV6_DANRE Fibulin-4 OS=Danio rerio GN=crygm4 PE=2 SV=2		3	2	0	0	0	3	2	3	0	0	0	0	1	2	0	1	0	0	0	0	1	0	0	1	0				0	0	0	296760	0	236480	0	0	0	0	0	0	0	0	0	0	0	0
1330	Q66HV8	>tr|Q66HV8|Q66HV8_DANRE Phosphofructokinase, muscle a OS=Danio rerio GN=pfkma PE=2 SV=1		3	1	0	0	0	0	1	0	0	1	1	0	0	1	0	0	1	3	2	0	0	1	2	2	1				0	0	0	0	0	0	0	0	0	0	0	0	0	0	0	0	0	0
1335	Q66I23;F1Q6N5;E7FDP7;E9QHW0	>tr|Q66I23|Q66I23_DANRE Transforming growth factor beta 3 OS=Danio rerio GN=tgfb3 PE=2 SV=1;>tr|F1Q6N5|F1Q6N5_DANRE Uncharacterized protein (Fragment) OS=Danio rerio GN=tgfb3 PE=3 SV=1		3	3	0	0	1	3	2	2	2	1	1	3	3	3	3	3	0	2	1	2	1	2	2	2	2				0	0	0	299880	0	279820	0	0	0	277830	239360	326560	943210	270340	0	0	0	0
664	Q6AXL0;F1Q7G0	>tr|Q6AXL0|Q6AXL0_DANRE Collagen triple helix repeat containing 1a OS=Danio rerio GN=cthrc1a PE=2 SV=1;>tr|F1Q7G0|F1Q7G0_DANRE Uncharacterized protein (Fragment) OS=Danio rerio GN=cthrc1a PE=4 SV=1		3	3	1	1	1	2	2	2	3	3	2	2	1	1	1	1	3	3	3	1	2	1	2	3	1				0	0	0	409450	521570	633040	955860	736060	835530	0	0	0	0	0	1986400	2222600	1669700	0
1342	Q6AZC0	>tr|Q6AZC0|Q6AZC0_DANRE Novel protein similar to vertebrate elastase 2 neutrophil (ELA2) OS=Danio rerio GN=DKEY-57C15.2-001 PE=2 SV=1		3	3	2	2	2	3	3	3	0	1	0	0	0	0	0	1	1	0	1	0	1	0	0	0	0				733270	789800	737480	970280	759680	901590	0	0	0	0	0	0	0	0	0	0	0	0
1358	Q6DGP6	>tr|Q6DGP6|Q6DGP6_DANRE SUB1 homolog (S. cerevisiae) OS=Danio rerio GN=sub1 PE=2 SV=1		3	3	0	0	0	1	2	1	3	3	2	2	3	3	2	2	2	2	2	2	2	3	2	1	3				0	0	0	0	164740	0	1846600	759320	1186700	2448300	3092500	1845000	608690	529170	331070	369210	431200	958490
1029	Q6DGY8;Q7SXN6;F1R2U4;Q6GQM3	>tr|Q6DGY8|Q6DGY8_DANRE Proteasome subunit alpha type OS=Danio rerio GN=psma6b PE=2 SV=1;>tr|Q7SXN6|Q7SXN6_DANRE Proteasome subunit alpha type OS=Danio rerio GN=psma6a PE=2 SV=1;>tr|F1R2U4|F1R2U4_DANRE Proteasome subunit alpha type OS=Danio rerio GN=psma6a		3	3	3	3	3	1	1	1	1	2	1	1	1	1	1	1	0	0	0	0	0	0	1	0	0				418450	2229100	480340	0	0	0	0	194750	0	0	0	0	0	0	0	0	0	0
930	Q6DHE6;F1QSF6	>tr|Q6DHE6|Q6DHE6_DANRE Lysyl-tRNA synthetase OS=Danio rerio GN=kars PE=2 SV=1;>tr|F1QSF6|F1QSF6_DANRE Lysyl-tRNA synthetase OS=Danio rerio GN=kars PE=3 SV=1		3	3	3	3	2	1	0	2	1	1	1	0	1	1	0	0	0	0	0	0	0	1	0	0	0				157350	368330	122540	0	0	26985	0	0	0	0	0	0	0	0	0	0	0	0
1307	Q6DHJ0;Q5SPF9;Q4V988;Q5SPH1;Q5SPH2	>tr|Q6DHJ0|Q6DHJ0_DANRE Splicing factor, arginine/serine-rich 5b OS=Danio rerio GN=srsf5b PE=2 SV=1;>tr|Q5SPF9|Q5SPF9_DANRE Novel protein similar to vertebrate splicing factor, arginine/serine-rich 5 protein (Fragment) OS=Danio rerio GN=srsf5b PE=2 SV=1;>t		3	2	1	1	0	2	1	2	2	3	3	3	3	3	3	3	1	1	1	2	1	1	2	1	1				0	0	0	0	0	0	0	0	0	0	0	0	0	227810	0	0	0	0
772	Q6DI17;Q8UUS9;F1QEL7	>tr|Q6DI17|Q6DI17_DANRE Glycoprotein M6Ab OS=Danio rerio GN=gpm6ab PE=2 SV=1;>tr|Q8UUS9|Q8UUS9_DANRE DMbeta2a OS=Danio rerio GN=gpm6ab PE=2 SV=1;>tr|F1QEL7|F1QEL7_DANRE Uncharacterized protein (Fragment) OS=Danio rerio GN=gpm6ab PE=4 SV=1		3	3	3	3	3	2	3	1	2	2	2	1	0	1	1	1	2	2	0	0	1	1	0	2	1				6081500	4716000	1585700	347070	401890	0	223780	484520	489650	0	0	0	0	0	784380	769910	0	0
1197	Q6DRD2;Q1LUG7	>tr|Q6DRD2|Q6DRD2_DANRE 26S protease regulatory subunit S10B OS=Danio rerio GN=psmc6 PE=2 SV=1;>tr|Q1LUG7|Q1LUG7_DANRE Proteasome (Prosome, macropain) 26S subunit, ATPase, 6 (Fragment) OS=Danio rerio GN=psmc6 PE=2 SV=1		3	3	2	2	2	1	2	2	3	3	3	2	1	3	3	2	1	1	0	1	2	1	3	1	1				0	192670	185490	0	109340	0	166280	395140	404470	259570	0	286140	113900	152670	0	0	0	0
386	Q6NUY8;E7F167;F1RET0;F1R5B8	>tr|Q6NUY8|Q6NUY8_DANRE Ndufa9 protein (Fragment) OS=Danio rerio GN=ndufa9 PE=2 SV=1;>tr|E7F167|E7F167_DANRE Uncharacterized protein OS=Danio rerio GN=OTTDARG00000019702 PE=4 SV=1;>tr|F1RET0|F1RET0_DANRE Uncharacterized protein (Fragment) OS=Danio rerio GN		3	3	1	1	2	1	1	1	2	3	1	1	2	3	1	2	1	0	1	0	0	0	3	1	1				0	0	637980	0	0	0	404880	628550	0	0	332560	326550	0	290920	0	0	0	0
1417	Q6NY81	>tr|Q6NY81|Q6NY81_DANRE Uncharacterized protein OS=Danio rerio GN=EHD1 (3 of 3) PE=2 SV=1		3	2	1	1	2	1	2	2	0	1	0	0	0	1	0	0	0	0	1	0	0	0	0	0	0				0	0	0	0	356290	0	0	0	0	0	0	0	0	0	0	0	0	0
1017	Q6P102;F1R1X5	>tr|Q6P102|Q6P102_DANRE Tyrosine 3-monooxygenase/tryptophan 5-monooxygenase activation protein, beta polypeptide like OS=Danio rerio GN=ywhabl PE=2 SV=1;>tr|F1R1X5|F1R1X5_DANRE Uncharacterized protein (Fragment) OS=Danio rerio GN=ywhabl PE=3 SV=1		3	1	2	2	2	2	2	2	2	2	1	2	2	2	2	2	2	2	2	2	2	2	1	2	2				0	0	0	0	0	0	0	0	0	0	0	0	0	0	0	0	0	0
1444	Q6P3J7	>tr|Q6P3J7|Q6P3J7_DANRE EH-domain containing 2 OS=Danio rerio GN=ehd2 PE=2 SV=1		3	3	1	0	0	2	1	2	1	2	1	2	2	2	1	1	1	2	2	1	2	2	2	2	2				0	0	0	222390	0	215960	0	216780	0	0	659150	0	0	0	0	334350	211610	0
1449	Q6P5K6	>tr|Q6P5K6|Q6P5K6_DANRE Solute carrier family 25 (Carnitine/acylcarnitine translocase), member 20 OS=Danio rerio GN=slc25a20 PE=2 SV=1		3	3	3	3	3	2	2	2	2	2	2	0	2	2	0	0	0	0	0	0	0	0	0	0	0				3735800	1344600	1330100	1184300	2230700	0	578010	1030400	1208000	0	216680	495460	0	0	0	0	0	0
1461	Q6PBJ9	>tr|Q6PBJ9|Q6PBJ9_DANRE Ribosomal protein, large P2 OS=Danio rerio GN=rplp2 PE=2 SV=1		3	3	0	0	0	3	2	3	0	1	0	2	2	1	0	0	0	1	1	2	1	2	2	1	2				0	0	0	0	85525	394940	0	0	0	0	0	0	0	0	0	0	0	0
1469	Q6PBY0;F1R9V4	>tr|Q6PBY0|Q6PBY0_DANRE Guanine nucleotide binding protein (G protein), beta 5 OS=Danio rerio GN=gnb5b PE=2 SV=1		3	3	3	3	2	0	0	0	0	0	0	0	0	0	0	0	0	0	0	0	0	0	0	0	0				4261500	1445700	2551200	0	0	0	0	0	0	0	0	0	0	0	0	0	0	0
1152	Q6PE26;F1RE67	>tr|Q6PE26|Q6PE26_DANRE Calr protein OS=Danio rerio GN=calr PE=2 SV=1;>tr|F1RE67|F1RE67_DANRE Uncharacterized protein OS=Danio rerio GN=calr PE=3 SV=1		3	2	1	0	1	2	1	2	2	2	0	1	1	1	1	2	0	1	1	1	2	3	1	1	2				0	0	0	0	0	0	0	0	0	0	0	0	0	0	0	0	0	0
1514	Q6XG62;A3FKT8;F1R8T2	>tr|Q6XG62|Q6XG62_DANRE Ictacalcin OS=Danio rerio GN=icn PE=2 SV=1		3	3	1	1	1	2	2	2	2	1	1	2	2	2	1	1	1	0	0	1	1	2	2	0	1				0	0	0	0	0	0	0	0	0	0	0	0	0	0	0	0	0	0
1516	Q6YLH9	>tr|Q6YLH9|Q6YLH9_DANRE Caveolin OS=Danio rerio GN=cav1 PE=2 SV=1		3	3	3	3	3	3	3	2	3	3	2	2	2	2	2	2	2	1	1	0	2	1	1	1	2				6000600	2137400	4648800	2363800	6010700	2854800	2046900	5082300	4613000	2059500	2610300	3406800	3028400	2728400	5486900	0	0	0
1517	Q6ZM13	>tr|Q6ZM13|Q6ZM13_DANRE Novel alpha globin OS=Danio rerio GN=si:ch211-5k11.6 PE=3 SV=1		3	2	0	0	0	1	1	1	1	2	1	1	1	1	1	1	3	3	3	2	2	2	1	1	2				0	0	0	0	0	0	0	0	0	0	0	0	0	0	0	0	2275000	0
585	Q7SZ49;E9QDU8	>tr|Q7SZ49|Q7SZ49_DANRE Short chain dehydrogenase/reductase family 16C, member 5 OS=Danio rerio GN=sdr16c5 PE=2 SV=1;>tr|E9QDU8|E9QDU8_DANRE Uncharacterized protein OS=Danio rerio GN=sdr16c5b PE=3 SV=1		3	3	3	3	2	3	3	3	3	3	3	1	3	3	2	2	1	2	0	0	2	1	2	1	1				315200	309820	531200	433670	477300	334560	255680	447930	636390	0	205980	234530	301730	175820	0	182100	0	0
1392	Q7SZZ5;Q6IQK3;Q6PBJ3	>tr|Q7SZZ5|Q7SZZ5_DANRE Novel protein similar to vertebrate vesicle-associated membrane protein 2 (Synaptobrevin 2) (VAMP2) OS=Danio rerio GN=vamp2 PE=4 SV=1;>tr|Q6IQK3|Q6IQK3_DANRE Uncharacterized protein OS=Danio rerio GN=vamp3 PE=2 SV=1;>tr|Q6PBJ3|Q6PBJ		3	3	3	2	3	3	2	3	0	3	1	0	1	1	1	0	0	0	0	0	0	0	0	0	1				1543500	0	833820	230370	0	143080	0	204500	0	0	0	0	0	0	0	0	0	0
606	Q7T1K0;E9QHB7	>tr|Q7T1K0|Q7T1K0_DANRE Uncharacterized protein OS=Danio rerio GN=zgc:65996 PE=2 SV=1;>tr|E9QHB7|E9QHB7_DANRE Uncharacterized protein OS=Danio rerio GN=zgc:65996 PE=3 SV=1		3	3	2	1	2	2	2	2	3	3	2	3	3	3	1	2	1	0	1	1	0	2	2	2	2				0	0	276370	0	0	0	879610	2728900	837270	834020	676880	809860	0	481000	0	0	0	0
1546	Q7T2P2;REV__F1QPA7;REV__Q6DEJ5	>tr|Q7T2P2|Q7T2P2_DANRE Chaperonin containing TCP1, subunit 3 (Gamma) OS=Danio rerio GN=cct3 PE=2 SV=1		3	3	1	1	2	2	2	2	2	2	3	2	2	2	2	2	1	2	1	2	2	2	2	1	1				0	0	165760	111640	96091	128240	155960	176110	190240	239410	323150	276550	104160	138080	0	60344	0	44305
1560	Q7ZTZ4	>tr|Q7ZTZ4|Q7ZTZ4_DANRE Fibrillarin OS=Danio rerio GN=fbl PE=2 SV=1		3	3	2	2	1	2	2	3	1	1	2	0	0	2	0	0	0	0	0	0	1	1	1	0	0				182020	146550	0	0	0	215110	0	0	0	0	0	0	0	0	0	0	0	0
1561	Q7ZU33	>tr|Q7ZU33|Q7ZU33_DANRE Ck2a2 protein OS=Danio rerio GN=ck2a2a PE=2 SV=1		3	2	1	2	2	2	2	1	1	1	1	0	0	1	1	1	0	0	0	0	0	0	0	0	0				0	0	0	0	0	0	0	0	0	0	0	0	0	26406	0	0	0	0
1563	Q7ZU62;F1QHN6;F1R2W8;B0R189;F1Q8K7;Q3B7P7;B0R193	>tr|Q7ZU62|Q7ZU62_DANRE Uncharacterized protein (Fragment) OS=Danio rerio GN=rps27a PE=2 SV=1;>tr|F1QHN6|F1QHN6_DANRE Uncharacterized protein OS=Danio rerio GN=ubc PE=4 SV=1;>tr|F1R2W8|F1R2W8_DANRE Uncharacterized protein (Fragment) OS=Danio rerio GN=si:ch		3	3	3	2	2	2	3	3	2	3	1	3	3	2	2	2	2	2	1	2	1	1	1	1	2				1916600	1117000	1687700	392110	535010	331340	864130	878130	0	1224200	786280	620710	5505500	3801800	1271900	433420	0	384110
1569	Q7ZUE4	>tr|Q7ZUE4|Q7ZUE4_DANRE PRP40 pre-mRNA processing factor 40 homolog A (Yeast) OS=Danio rerio GN=prpf40a PE=2 SV=1		3	3	1	1	2	3	2	2	2	2	2	2	2	2	2	2	1	0	0	0	0	0	1	0	1				0	0	0	0	152280	0	112270	144830	179240	133870	92017	110740	0	203030	0	0	0	0
1192	Q7ZUG6;Q1L8Q7	>tr|Q7ZUG6|Q7ZUG6_DANRE Novel protein (Zgc:56640) OS=Danio rerio GN=rpl30 PE=2 SV=1;>tr|Q1L8Q7|Q1L8Q7_DANRE Novel protein (Zgc:56640) OS=Danio rerio GN=rpl30 PE=2 SV=1		3	3	3	2	2	3	3	2	3	3	3	3	3	3	3	3	2	2	2	1	2	2	2	1	3				1010100	505870	927000	605180	719700	409240	3114900	2928100	2243100	2953700	2955300	3312100	1022600	711300	516080	331870	161940	0
1573	Q7ZUN7	>tr|Q7ZUN7|Q7ZUN7_DANRE Creatine kinase, mitochondrial 1 OS=Danio rerio GN=ckmt1 PE=2 SV=1		3	2	2	3	3	2	2	2	2	2	3	0	0	1	0	0	1	1	1	0	0	1	1	1	0				0	0	0	0	0	0	0	0	267490	0	0	0	0	0	0	0	0	0
1574	Q7ZUZ4	>tr|Q7ZUZ4|Q7ZUZ4_DANRE Programmed cell death 5 OS=Danio rerio GN=pdcd5 PE=2 SV=1		3	3	0	0	0	3	3	3	3	2	2	3	3	3	2	3	3	3	3	2	2	3	2	3	3				0	0	0	235830	95288	830850	159500	101550	99477	297050	1304200	372380	227400	173770	1051400	1885000	1834000	3523800
609	Q7ZV13;E9QHD6;Q6NZT9	>tr|Q7ZV13|Q7ZV13_DANRE Splicing factor, arginine/serine-rich 2 OS=Danio rerio GN=srsf2 PE=2 SV=1;>tr|E9QHD6|E9QHD6_DANRE Uncharacterized protein OS=Danio rerio GN=srsf2 PE=4 SV=1;>tr|Q6NZT9|Q6NZT9_DANRE Uncharacterized protein OS=Danio rerio GN=SRSF2 (2 o		3	3	0	0	1	2	1	1	3	3	3	3	3	3	3	3	1	1	2	3	3	2	3	1	2				0	0	0	634900	0	0	9494300	2520100	3766600	5265800	5398600	3359300	2596400	3069600	0	0	1262100	873680
1577	Q7ZV77	>tr|Q7ZV77|Q7ZV77_DANRE Proteasome subunit alpha type OS=Danio rerio GN=psma4 PE=2 SV=1		3	3	1	3	1	1	0	0	2	0	1	2	0	3	1	0	0	0	0	0	1	1	0	0	0				0	1164900	0	0	0	0	39243	0	0	54759	0	39202	0	0	0	0	0	0
577	Q7ZVT1;E9QCI8;F1R0S8	>tr|Q7ZVT1|Q7ZVT1_DANRE Uncharacterized protein OS=Danio rerio GN=zgc:55671 PE=2 SV=1;>tr|E9QCI8|E9QCI8_DANRE Uncharacterized protein OS=Danio rerio GN=zgc:55671 PE=4 SV=1;>tr|F1R0S8|F1R0S8_DANRE Uncharacterized protein OS=Danio rerio GN=zgc:55671 PE=4 SV=		3	3	1	1	1	2	2	1	0	0	1	0	0	0	0	0	0	0	0	0	0	0	0	0	0				0	0	0	502720	0	0	0	0	0	0	0	0	0	0	0	0	0	0
773	Q7ZZ76;F1QEW4	>tr|Q7ZZ76|Q7ZZ76_DANRE Novel flotillin OS=Danio rerio GN=flot1 PE=4 SV=1;>tr|F1QEW4|F1QEW4_DANRE Uncharacterized protein OS=Danio rerio GN=flot1a PE=4 SV=1		3	2	3	2	2	3	3	2	2	3	2	2	2	2	1	1	1	0	0	0	0	0	0	0	0				287370	0	0	434040	497290	0	0	355860	0	0	0	0	0	0	0	0	0	0
1599	Q803H7	>tr|Q803H7|Q803H7_DANRE Integral membrane protein 2Ba OS=Danio rerio GN=itm2ba PE=2 SV=1		3	3	0	0	0	2	1	2	3	3	3	3	3	3	3	2	2	2	2	2	2	2	2	3	3				0	0	0	69966	0	119150	607260	219740	206050	728960	323710	262820	1005000	575460	82129	155230	335220	425980
1640	Q9DDG2	>tr|Q9DDG2|Q9DDG2_DANRE Midkine-related growth factor Mdk2 OS=Danio rerio GN=mdkb PE=2 SV=1		3	3	0	1	1	3	3	3	3	3	2	3	3	3	3	3	1	2	2	2	2	2	1	2	2				0	0	0	3184900	3959100	2307600	10597000	3599100	7521800	12412000	9196300	5848500	4504800	4192200	0	2858600	5066300	1216600
1642	Q9DGI4	>tr|Q9DGI4|Q9DGI4_DANRE ATPase, Na+/K+ transporting, beta 3b polypeptide OS=Danio rerio GN=atp1b3b PE=2 SV=1		3	3	2	1	2	3	2	3	2	2	2	1	2	2	1	0	0	0	0	0	0	0	0	0	0				1422900	0	585430	1856100	1233200	1638300	279970	976310	742610	0	410460	589390	0	0	0	0	0	0
1650	Q9I9E9;Q7ZWD3	>tr|Q9I9E9|Q9I9E9_DANRE Eukaryotic translation initiation factor 2, subunit 1 alpha OS=Danio rerio GN=eif2s1 PE=2 SV=1		3	3	3	3	2	1	0	0	0	0	0	1	0	1	0	0	0	1	1	1	1	0	1	1	0				789900	1214400	541980	0	0	0	0	0	0	0	0	0	0	0	0	0	0	0
74	A5PL98	>sp|A5PL98|DHSB_DANRE Succinate dehydrogenase [ubiquinone] iron-sulfur subunit, mitochondrial OS=Danio rerio GN=sdhb PE=2 SV=1		2	2	2	2	2	2	2	2	1	1	1	0	0	0	0	0	0	1	0	0	0	0	1	0	0				347080	254420	226490	744530	526390	592890	0	0	0	0	0	0	0	0	0	0	0	0
75	A5PLC8	>sp|A5PLC8|PTMAB_DANRE Prothymosin alpha-B OS=Danio rerio GN=ptmab PE=1 SV=1		2	2	0	0	0	2	1	1	2	2	1	2	2	1	1	2	2	2	2	2	1	2	1	2	1				0	0	0	2245000	0	0	879670	563640	0	11128000	17384000	0	0	1302400	4618800	2483800	2417000	6303400
1226	Q1MTD3	>sp|Q1MTD3|MCES_DANRE mRNA cap guanine-N7 methyltransferase OS=Danio rerio GN=rnmt PE=2 SV=1		2	2	2	2	2	2	1	0	0	0	0	0	0	0	0	0	0	0	0	0	0	0	0	0	0				118420	136550	218290	39747	0	0	0	0	0	0	0	0	0	0	0	0	0	0
1233	Q24JV4	>sp|Q24JV4|U390_DANRE UPF0390 protein zgc136864 OS=Danio rerio GN=zgc:136864 PE=2 SV=1		2	2	0	0	0	0	1	1	0	0	0	0	0	0	0	0	0	1	1	1	0	0	1	0	1				0	0	0	0	0	0	0	0	0	0	0	0	0	0	0	0	0	0
1298	Q5RH51	>sp|Q5RH51|XYLK_DANRE Glycosaminoglycan xylosylkinase OS=Danio rerio GN=fam20b PE=2 SV=1		2	1	2	2	2	1	1	1	1	2	1	2	2	1	1	2	1	0	1	0	0	0	1	0	1				0	0	0	0	0	0	0	0	0	0	0	0	0	0	0	0	383040	0
1308	Q5SPJ8	>sp|Q5SPJ8|XPOT_DANRE Exportin-T OS=Danio rerio GN=xpot PE=3 SV=1		2	2	2	2	0	0	0	0	0	0	0	0	0	0	0	0	0	0	0	0	0	0	0	0	1				96601	342980	0	0	0	0	0	0	0	0	0	0	0	0	0	0	0	0
1694	REV__Q5TYQ1	>sp|Q5TYQ1|ZYG11_DANRE Protein zyg-11 homolog OS=Danio rerio GN=zyg11 PE=2 SV=1		2	2	1	1	1	1	1	1	0	0	1	1	0	1	1	1	1	0	0	1	0	1	0	0	0		+		0	0	0	0	0	2397100	0	0	0	0	0	0	0	0	0	0	0	0
1352	Q6DG36	>sp|Q6DG36|ZNT5_DANRE Zinc transporter 5 OS=Danio rerio GN=slc30a5 PE=2 SV=1		2	2	2	2	2	1	1	0	0	2	2	0	0	0	0	0	0	0	0	0	0	0	0	1	0				463740	391130	565660	0	0	0	0	155440	225630	0	0	0	0	0	0	0	0	0
1375	Q6DRL5;F1QS42	>sp|Q6DRL5|MBB1A_DANRE Myb-binding protein 1A-like protein OS=Danio rerio GN=mybbp1a PE=1 SV=1;>tr|F1QS42|F1QS42_DANRE Uncharacterized protein (Fragment) OS=Danio rerio GN=FP102096.1 PE=4 SV=1		2	2	1	1	1	1	1	1	1	1	0	0	0	1	0	0	0	0	0	0	0	0	0	0	1				0	0	0	0	0	0	0	0	0	0	0	17374	0	0	0	0	0	0
1386	Q6IQC7	>sp|Q6IQC7|TMX2B_DANRE Thioredoxin-related transmembrane protein 2-B OS=Danio rerio GN=tmx2b PE=2 SV=1		2	2	1	1	1	2	2	1	1	1	2	1	2	2	1	1	1	1	1	1	0	1	1	1	1				0	0	0	1261900	0	0	0	0	499970	0	0	0	0	0	0	0	0	0
1209	Q6NZ07;Q1LW20	>sp|Q6NZ07|NCLN_DANRE Nicalin-1 OS=Danio rerio GN=ncl1 PE=2 SV=1;>tr|Q1LW20|Q1LW20_DANRE Nicalin OS=Danio rerio GN=ncl1 PE=4 SV=1		2	2	2	1	1	2	2	2	2	2	2	1	1	2	0	1	1	1	0	0	1	0	1	0	0				1039400	0	0	484940	306700	439830	141850	127930	241600	0	0	119920	0	0	0	0	0	0
1450	Q6P5L3	>sp|Q6P5L3|RL19_DANRE 60S ribosomal protein L19 OS=Danio rerio GN=rpl19 PE=2 SV=1		2	2	1	1	0	1	1	0	2	2	2	2	2	1	1	1	0	0	0	0	1	1	1	1	0				0	0	0	0	0	0	4453000	0	6119800	3662000	0	0	0	0	0	0	0	0
1474	Q6PC14	>sp|Q6PC14|RL23_DANRE 60S ribosomal protein L23 OS=Danio rerio GN=rpl23 PE=2 SV=1		2	2	1	1	1	2	2	2	2	1	1	2	1	2	1	1	1	1	0	1	2	1	2	2	2				0	0	0	420000	382610	854490	333810	0	0	314530	0	618220	0	0	0	0	0	0
1481	Q6PE25	>sp|Q6PE25|EF1G_DANRE Elongation factor 1-gamma OS=Danio rerio GN=eef1g PE=2 SV=1		2	2	1	1	1	1	1	1	0	0	1	0	0	1	1	0	0	0	0	0	0	0	0	1	0				0	0	0	0	0	0	0	0	0	0	0	0	90229	0	0	0	0	0
1492	Q6PHG2	>sp|Q6PHG2|HEMO_DANRE Hemopexin OS=Danio rerio GN=hpx PE=2 SV=2		2	2	0	0	0	0	0	0	1	1	0	2	2	2	0	0	2	1	1	1	1	1	1	2	2				0	0	0	0	0	0	0	0	0	0	0	0	0	0	0	0	0	0
1498	Q6Q415	>sp|Q6Q415|RL36_DANRE 60S ribosomal protein L36 OS=Danio rerio GN=rpl36 PE=2 SV=1		2	2	2	1	1	0	1	0	2	2	1	1	1	1	1	2	1	0	0	0	0	1	0	0	0				0	0	0	0	0	0	0	0	0	0	0	0	0	335040	0	0	0	0
1211	Q6TGS6;Q1LWM3;Q1LWM2;Q1LWM1;Q1LWM0	>sp|Q6TGS6|SYYC_DANRE Tyrosyl-tRNA synthetase, cytoplasmic OS=Danio rerio GN=yars PE=2 SV=2;>tr|Q1LWM3|Q1LWM3_DANRE Tyrosyl-tRNA synthetase (Fragment) OS=Danio rerio GN=yars PE=2 SV=1;>tr|Q1LWM2|Q1LWM2_DANRE Tyrosyl-tRNA synthetase (Fragment) OS=Danio reri		2	2	1	2	1	0	0	0	0	0	1	0	0	0	0	1	0	0	0	0	0	0	0	0	0				0	141750	0	0	0	0	0	0	0	0	0	0	0	0	0	0	0	0
1532	Q7SZC2	>sp|Q7SZC2|XPO2_DANRE Exportin-2 OS=Danio rerio GN=cse1l PE=2 SV=1		2	2	2	1	0	1	0	1	1	1	1	1	0	0	0	1	1	1	0	1	1	0	1	1	0				374580	0	0	0	0	0	0	0	0	0	0	0	0	0	0	0	0	0
1536	Q7SZQ7	>sp|Q7SZQ7|SURF4_DANRE Surfeit locus protein 4 OS=Danio rerio GN=surf4 PE=2 SV=1		2	1	2	1	2	1	1	1	1	2	2	1	1	1	1	1	0	1	0	0	1	0	1	0	1				0	0	0	0	0	0	0	0	114120	0	0	0	0	0	0	0	0	0
1594	Q802F3	>sp|Q802F3|SEP15_DANRE 15 kDa selenoprotein OS=Danio rerio GN=sep15 PE=2 SV=2		2	2	0	0	0	1	1	2	1	1	1	1	1	1	1	1	0	0	0	1	1	1	1	1	1				0	0	0	0	0	0	0	0	0	0	0	0	0	0	0	0	0	0
1622	Q8JHJ1	>sp|Q8JHJ1|RL35_DANRE 60S ribosomal protein L35 OS=Danio rerio GN=rpl35 PE=2 SV=3		2	2	2	2	2	2	2	2	2	2	2	2	2	2	2	2	2	2	1	2	1	2	2	1	2				1308900	1408100	1323000	3875500	6319700	5173900	4791700	6028800	6045200	7782900	6255900	6297600	4926500	2396400	525960	536830	0	466320
1665	Q9PVK4;E7FA49;Q6DGK2;Q9PVK5;E9QGA6;E9QH54	>sp|Q9PVK4|LDHBA_DANRE L-lactate dehydrogenase B-A chain OS=Danio rerio GN=ldhba PE=2 SV=4;>tr|E7FA49|E7FA49_DANRE L-lactate dehydrogenase OS=Danio rerio GN=ldhbb PE=3 SV=1;>sp|Q6DGK2|LDHBB_DANRE L-lactate dehydrogenase B-B chain OS=Danio rerio GN=ldhbb PE		2	2	2	1	1	0	1	1	1	1	2	1	0	1	1	2	1	1	2	1	2	2	1	0	2				1739200	0	0	0	0	0	0	0	1310400	0	0	0	0	633760	0	0	1089600	0
3	A0JML7	>tr|A0JML7|A0JML7_DANRE ADP-dependent glucokinase OS=Danio rerio GN=adpgk PE=2 SV=1		2	2	2	2	2	2	2	1	1	2	1	0	1	0	0	0	0	1	0	0	0	0	0	0	0				853350	789880	816880	313620	434290	0	0	265380	0	0	0	0	0	0	0	0	0	0
5	A0JMN2	>tr|A0JMN2|A0JMN2_DANRE Novel protein similar to vertebrate carnitine acetyltransferase (CRAT, zgc:154046) OS=Danio rerio GN=CH211-163B2.5 PE=2 SV=1		2	2	1	0	1	2	2	2	0	0	0	0	0	0	1	0	0	1	0	0	0	1	0	1	0				0	0	0	108840	172700	136300	0	0	0	0	0	0	0	0	0	0	0	0
15	A1L5C9	>tr|A1L5C9|A1L5C9_DANRE Semaphorin 3ga (Fragment) OS=Danio rerio GN=sema3ga PE=2 SV=1		2	2	0	0	0	0	0	0	1	0	0	1	0	1	2	1	1	0	0	1	0	1	1	0	2				0	0	0	0	0	0	0	0	0	0	0	0	228180	0	0	0	0	0
25	A2BGE7;P61485	>tr|A2BGE7|A2BGE7_DANRE Ribosomal protein L36A OS=Danio rerio GN=rpl36a PE=3 SV=1;>sp|P61485|RL36A_DANRE 60S ribosomal protein L36a OS=Danio rerio GN=rpl36a PE=2 SV=2		2	2	1	1	2	1	1	1	2	2	2	2	2	2	2	2	2	0	1	0	0	0	0	0	0				0	0	298990	0	0	0	1316500	1193200	0	1365900	1098900	1180800	0	0	0	0	0	0
32	A2BID0	>tr|A2BID0|A2BID0_DANRE Novel protein OS=Danio rerio GN=si:ch211-243a20.3 PE=4 SV=1		2	2	0	0	0	0	0	0	0	0	0	0	1	1	2	1	1	2	2	2	0	0	2	2	2				0	0	0	0	0	0	0	0	0	0	0	0	52400	0	0	234970	92391	49441
42	A2CEM4;A2CEM2;A2CEM3	>tr|A2CEM4|A2CEM4_DANRE Novel protein (Zgc:103512) OS=Danio rerio GN=CH211-145O7.1 PE=4 SV=1;>tr|A2CEM2|A2CEM2_DANRE Novel protein (Zgc:103512) (Fragment) OS=Danio rerio GN=CH211-145O7.1 PE=4 SV=1;>tr|A2CEM3|A2CEM3_DANRE Novel protein (Zgc:103512) (Fragmen		2	2	1	2	2	0	0	1	1	2	2	0	0	0	0	0	0	0	0	0	0	0	0	0	0				0	681560	0	0	0	0	0	344310	335020	0	0	0	0	0	0	0	0	0
61	A3KQ87;F1QWN0	>tr|A3KQ87|A3KQ87_DANRE Novel protein similar to vertebrate transglutaminase 2 (C polypeptide, protein-glutamine-gamma-glutamyltransferase) (TGM2) OS=Danio rerio GN=si:dkey-73n10.5 PE=3 SV=1;>tr|F1QWN0|F1QWN0_DANRE Uncharacterized protein (Fragment) OS=Dan		2	2	1	1	1	1	1	0	0	0	0	2	2	2	1	1	0	0	0	0	0	1	1	0	0				0	0	0	0	0	0	0	0	0	139250	201240	0	0	0	0	0	0	0
66	A4FVI5	>tr|A4FVI5|A4FVI5_DANRE Uncharacterized protein OS=Danio rerio GN=ucma PE=2 SV=1		2	2	0	0	0	0	0	2	2	0	0	1	2	2	2	2	1	2	1	2	1	1	2	1	2				0	0	0	0	0	69959	79249	0	0	0	124750	104140	575580	505620	0	326250	0	329470
86	A5WW56	>tr|A5WW56|A5WW56_DANRE Novel protein OS=Danio rerio GN=si:ch211-80h18.1 PE=4 SV=1		2	2	0	0	0	0	0	0	1	1	0	0	0	0	0	0	0	2	2	0	0	0	0	0	0				0	0	0	0	0	0	0	0	0	0	0	0	0	0	0	649780	4467400	0
96	A7E2K4	>tr|A7E2K4|A7E2K4_DANRE Rplp2l protein OS=Danio rerio GN=rplp2l PE=4 SV=1		2	2	1	1	0	2	1	2	2	2	2	2	2	2	2	2	1	1	1	1	0	1	2	1	1				0	0	0	1736000	0	1572400	1051200	647040	652700	1164200	1102600	1022200	954050	858890	0	0	0	0
105	A7MCK9;F1QJB4;Q7SXP0;A5WV65;Q7ZV15	>tr|A7MCK9|A7MCK9_DANRE Sec22bb protein OS=Danio rerio GN=sec22bb PE=2 SV=1;>tr|F1QJB4|F1QJB4_DANRE Uncharacterized protein OS=Danio rerio GN=sec22bb PE=4 SV=1;>sp|Q7SXP0|S22BB_DANRE Vesicle-trafficking protein SEC22b-B OS=Danio rerio GN=sec22bb PE=2 SV=1;		2	2	2	2	2	2	2	1	1	2	1	0	1	1	1	1	0	1	0	1	1	1	1	1	1				636920	566210	571530	236210	210680	0	0	233390	0	0	0	0	0	0	0	0	0	0
116	A8E5C1;F1RDH7;A9JSZ7;F1Q853;F1QV84	>tr|A8E5C1|A8E5C1_DANRE LOC564060 protein OS=Danio rerio GN=serpina7 PE=2 SV=1;>tr|F1RDH7|F1RDH7_DANRE Uncharacterized protein (Fragment) OS=Danio rerio GN=CR559930.3 PE=3 SV=1;>tr|A9JSZ7|A9JSZ7_DANRE Uncharacterized protein OS=Danio rerio GN=zgc:113828 PE		2	2	0	0	0	0	1	0	0	0	0	0	1	1	0	0	2	1	1	2	1	2	1	1	1				0	0	0	0	0	0	0	0	0	0	0	0	0	0	0	0	0	0
119	A8E5H4	>tr|A8E5H4|A8E5H4_DANRE Uncharacterized protein OS=Danio rerio GN=golga7 PE=2 SV=1		2	2	1	1	1	1	0	0	0	0	0	0	0	0	0	0	0	0	0	0	0	0	0	0	0				0	0	0	7612.9	0	0	0	0	0	0	0	0	0	0	0	0	0	0
126	A8E7G6;Q5BJB9;A8E7G7	>tr|A8E7G6|A8E7G6_DANRE Novel protein similar to vertebrate peroxiredoxin 3 (PRDX3) OS=Danio rerio GN=prdx3 PE=4 SV=1;>tr|Q5BJB9|Q5BJB9_DANRE Prdx3 protein OS=Danio rerio GN=prdx3 PE=2 SV=1;>tr|A8E7G7|A8E7G7_DANRE Novel protein similar to vertebrate peroxi		2	2	2	2	2	2	2	2	2	2	2	1	1	2	0	1	0	1	0	0	1	1	2	1	2				182690	360170	320590	145790	101370	138640	184940	248920	200030	0	0	137420	0	0	0	0	0	0
127	A8E7G8	>tr|A8E7G8|A8E7G8_DANRE Novel protein containing an endomembrane protein 70 domain (Zgc:56246) OS=Danio rerio GN=CH211-117N7.5 PE=4 SV=1		2	2	2	2	2	1	1	1	0	1	1	0	0	1	0	0	0	0	0	0	0	0	0	0	0				2425100	2207700	908920	0	0	0	0	0	0	0	0	0	0	0	0	0	0	0
154	B0R0K4;B0R0K5	>tr|B0R0K4|B0R0K4_DANRE Novel protein (Zgc:63021) OS=Danio rerio GN=CH211-103N10.2 PE=4 SV=1;>tr|B0R0K5|B0R0K5_DANRE Novel protein (Zgc:63021) (Fragment) OS=Danio rerio GN=CH211-103N10.2 PE=4 SV=1		2	1	0	0	0	0	0	0	0	0	0	0	0	0	0	0	0	0	0	0	0	0	2	2	2				0	0	0	0	0	0	0	0	0	0	0	0	0	0	0	0	0	0
155	B0R0K6	>tr|B0R0K6|B0R0K6_DANRE Novel protein OS=Danio rerio GN=si:ch211-103n10.4 PE=4 SV=1		2	1	0	0	0	0	0	0	0	0	0	0	0	0	0	0	1	0	0	0	0	0	1	1	2				0	0	0	0	0	0	0	0	0	0	0	0	0	0	0	0	0	0
171	B0S5J7;F1R920;B0S5J6	>tr|B0S5J7|B0S5J7_DANRE Aspartate beta-hydroxylase OS=Danio rerio GN=asph PE=4 SV=1;>tr|F1R920|F1R920_DANRE Uncharacterized protein OS=Danio rerio GN=asph PE=4 SV=1;>tr|B0S5J6|B0S5J6_DANRE Aspartate beta-hydroxylase OS=Danio rerio GN=asph PE=4 SV=1		2	2	2	2	2	1	2	1	1	2	2	0	0	0	0	0	0	0	1	0	0	0	0	0	0				1100500	869210	767820	0	144700	0	0	175640	202790	0	0	0	0	0	0	0	0	0
179	B0S629;B0S630	>tr|B0S629|B0S629_DANRE Novel protein OS=Danio rerio GN=si:dkeyp-73d8.9 PE=2 SV=1;>tr|B0S630|B0S630_DANRE Novel protein OS=Danio rerio GN=si:dkeyp-73d8.8 PE=4 SV=1		2	2	0	0	0	1	2	1	2	1	2	2	2	2	1	2	0	0	0	0	0	0	0	0	0				0	0	0	0	0	0	1326400	0	0	1362300	1638900	0	0	0	0	0	0	0
180	B0S6B4;F1QFU6;F1QQ68	>tr|B0S6B4|B0S6B4_DANRE Novel protein similar to human and mouse microtubule-associated protein 1A (MAP1A) OS=Danio rerio GN=si:dkey-193b15.3 PE=4 SV=1;>tr|F1QFU6|F1QFU6_DANRE Uncharacterized protein (Fragment) OS=Danio rerio GN=si:dkey-193b15.3 PE=4 SV=1;		2	2	0	1	1	1	1	0	1	0	1	1	1	1	1	1	1	1	2	1	0	1	1	2	2				0	0	0	0	0	0	0	0	0	0	0	0	0	0	0	0	0	0
192	B0S8J1;E7F3X0;E7F8S2;F1QY37	>tr|B0S8J1|B0S8J1_DANRE Novel protein similar to vertebrate kinesin family member 5C (KIF5C) OS=Danio rerio GN=kif5c PE=3 SV=1;>tr|E7F3X0|E7F3X0_DANRE Uncharacterized protein OS=Danio rerio GN=OTTDARG00000025494 PE=3 SV=2;>tr|E7F8S2|E7F8S2_DANRE Uncharacte		2	1	1	0	1	1	0	0	1	1	1	1	2	1	0	0	0	0	1	0	2	1	0	0	0				0	0	0	0	0	0	0	0	0	0	0	0	0	0	0	0	0	0
193	B0S8K3;B0S8K4	>tr|B0S8K3|B0S8K3_DANRE Leucine rich repeat containing 15 OS=Danio rerio GN=lrrc15 PE=4 SV=1;>tr|B0S8K4|B0S8K4_DANRE Leucine rich repeat containing 15 (Fragment) OS=Danio rerio GN=lrrc15 PE=4 SV=1		2	2	0	0	0	2	2	2	2	2	2	0	0	1	2	2	0	1	0	0	0	0	2	0	0				0	0	0	174170	117940	128900	101580	181780	161360	0	0	0	103730	113790	0	0	0	0
194	B0UX68	>tr|B0UX68|B0UX68_DANRE Novel protein similar to H.sapiens angiopoietin-like 7 (ANGPTL7, zgc:101687) OS=Danio rerio GN=angptl7 PE=4 SV=1		2	2	0	0	0	0	0	0	0	0	0	1	0	1	0	0	0	0	0	0	0	0	1	0	1				0	0	0	0	0	0	0	0	0	0	0	0	0	0	0	0	0	0
201	B0UYF9;F1R3K4	>tr|B0UYF9|B0UYF9_DANRE Novel collagen protein (Fragment) OS=Danio rerio GN=si:dkey-21p1.3 PE=4 SV=1;>tr|F1R3K4|F1R3K4_DANRE Uncharacterized protein (Fragment) OS=Danio rerio GN=si:dkey-21p1.3 PE=4 SV=1		2	2	1	1	1	2	2	2	1	1	1	2	2	2	1	1	1	0	0	1	2	1	1	1	2				0	0	0	0	0	0	0	0	0	0	0	0	0	0	0	0	0	0
206	B0UYN4	>tr|B0UYN4|B0UYN4_DANRE Novel protein (Zgc:162944) OS=Danio rerio GN=DKEY-57A22.8 PE=4 SV=1		2	2	1	1	0	0	1	1	1	2	2	2	2	2	1	0	1	1	1	1	2	2	1	1	0				0	0	0	0	0	0	0	171450	92537	177130	171200	193400	0	0	0	0	0	0
210	B0UYS1;Q04475	>tr|B0UYS1|B0UYS1_DANRE Beta-2-microglobulin OS=Danio rerio GN=b2m PE=3 SV=1;>sp|Q04475|B2MG_DANRE Beta-2-microglobulin OS=Danio rerio GN=b2m PE=3 SV=1		2	2	0	0	0	0	0	0	2	1	1	1	1	1	1	1	2	2	2	2	2	2	2	1	2				0	0	0	0	0	0	779200	0	0	0	0	0	0	0	2019100	2985000	3149600	10656000
222	B3DH85	>tr|B3DH85|B3DH85_DANRE NCAM OS=Danio rerio GN=ncam1 PE=2 SV=1		2	2	0	0	0	1	1	2	1	1	1	2	2	2	2	2	0	1	0	0	1	0	0	0	1				0	0	0	0	0	147070	0	0	0	43658	0	0	0	92736	0	0	0	0
234	B3DKJ0;F1R344	>tr|B3DKJ0|B3DKJ0_DANRE Chaperonin containing TCP1, subunit 7 (Eta) OS=Danio rerio GN=cct7 PE=2 SV=1;>tr|F1R344|F1R344_DANRE Uncharacterized protein (Fragment) OS=Danio rerio GN=cct7 PE=3 SV=1		2	2	2	0	1	1	2	1	2	2	2	2	2	2	1	1	0	0	0	0	1	0	0	0	0				145120	0	0	0	0	0	0	0	0	0	87968	203750	0	0	0	0	0	0
236	B5DDZ4	>tr|B5DDZ4|B5DDZ4_DANRE Acta1 protein OS=Danio rerio GN=dpp4 PE=2 SV=1		2	2	1	0	1	1	2	1	1	0	0	0	0	0	0	0	0	0	0	0	0	0	0	0	0				0	0	0	0	247300	0	0	0	0	0	0	0	0	0	0	0	0	0
251	B7ZV62	>tr|B7ZV62|B7ZV62_DANRE N-ethylmaleimide-sensitive factor OS=Danio rerio GN=nsfa PE=2 SV=1		2	1	2	2	2	2	2	2	2	2	2	1	1	2	0	0	1	1	0	0	0	0	1	0	0				0	0	0	0	0	0	0	0	0	0	0	0	0	0	0	0	0	0
261	B8A4W9;F1QD82	>tr|B8A4W9|B8A4W9_DANRE Lysyl oxidase-like 3b OS=Danio rerio GN=loxl3b PE=4 SV=1;>tr|F1QD82|F1QD82_DANRE Uncharacterized protein OS=Danio rerio GN=loxl3b PE=4 SV=1		2	2	0	0	0	2	1	2	2	2	2	2	2	2	1	1	0	2	2	2	2	1	1	0	1				0	0	0	296410	0	301380	467620	326670	349420	914790	459860	290050	0	0	0	352140	382620	406540
267	B8A5D4	>tr|B8A5D4|B8A5D4_DANRE Thioredoxin-like 1 OS=Danio rerio GN=txnl1 PE=4 SV=1		2	2	0	1	0	1	1	1	1	1	0	1	1	1	2	1	0	1	0	1	1	0	1	1	1				0	0	0	0	0	0	0	0	0	0	0	0	123310	0	0	0	0	0
268	B8A5H6;Q6NX09;E7EXV1;B8JKC9	>tr|B8A5H6|B8A5H6_DANRE Hexokinase domain containing 1 OS=Danio rerio GN=hkdc1 PE=3 SV=1;>tr|Q6NX09|Q6NX09_DANRE Hexokinase 1 OS=Danio rerio GN=hk1 PE=2 SV=1;>tr|E7EXV1|E7EXV1_DANRE Uncharacterized protein OS=Danio rerio GN=OTTDARG00000029146 PE=3 SV=1;>tr		2	2	1	1	2	1	1	1	0	1	1	0	0	1	0	0	0	1	0	0	0	0	0	0	0				0	0	246950	0	0	0	0	0	0	0	0	0	0	0	0	0	0	0
272	B8A5Q0;B8A5P9	>tr|B8A5Q0|B8A5Q0_DANRE Novel protein similar to vertebrate sphingomyelin synthase 2 (SGMS2) OS=Danio rerio GN=sgms2 PE=4 SV=1;>tr|B8A5P9|B8A5P9_DANRE Novel protein similar to vertebrate sphingomyelin synthase 2 (SGMS2) (Fragment) OS=Danio rerio GN=sgms2 P		2	2	2	2	2	0	1	0	1	0	1	1	1	2	2	2	1	0	0	0	0	0	0	0	1				1827700	2392500	2677200	0	0	0	0	0	0	0	0	1146600	6996100	21162000	0	0	0	0
277	B8A645;B8A646	>tr|B8A645|B8A645_DANRE Novel protein OS=Danio rerio GN=si:dkey-9i23.4 PE=4 SV=1;>tr|B8A646|B8A646_DANRE Novel protein OS=Danio rerio GN=si:dkey-9i23.5 PE=4 SV=1		2	2	0	1	0	0	0	0	0	0	0	0	0	0	0	0	0	0	0	0	0	0	2	2	1				0	0	0	0	0	0	0	0	0	0	0	0	0	0	0	0	0	0
285	B8JIS8;A8KBR8;B8JIS5;B8JIS6	>tr|B8JIS8|B8JIS8_DANRE Glutathione S-transferase M OS=Danio rerio GN=gstm PE=3 SV=1;>tr|A8KBR8|A8KBR8_DANRE Novel protein similar to glutathione S-transferase M (Gstm) OS=Danio rerio GN=zgc:173994 PE=2 SV=1;>tr|B8JIS5|B8JIS5_DANRE Glutathione S-transferas		2	2	0	0	0	0	0	0	0	1	0	0	0	0	0	1	0	0	0	0	1	0	0	0	0				0	0	0	0	0	0	0	0	0	0	0	0	0	34467	0	0	0	0
307	B8JLZ3;F1Q8E2;F1QZF1	>tr|B8JLZ3|B8JLZ3_DANRE Annexin A1b OS=Danio rerio GN=anxa1b PE=3 SV=1;>tr|F1Q8E2|F1Q8E2_DANRE Uncharacterized protein (Fragment) OS=Danio rerio GN=anxa1b PE=3 SV=1;>tr|F1QZF1|F1QZF1_DANRE Uncharacterized protein (Fragment) OS=Danio rerio GN=anxa1b PE=3 SV		2	2	2	2	2	1	1	1	1	2	1	0	1	0	1	2	0	0	0	0	0	0	1	0	0				526360	361920	1104600	0	0	0	0	485450	0	0	0	0	0	220340	0	0	0	0
309	B8JMA2;B8JMA6;B8JMA7;F1QH37;F1QYZ1;B8JMA8;B8JMA1;F1RDD2;F1R1M9	>tr|B8JMA2|B8JMA2_DANRE Novel protein (Zgc:153113) OS=Danio rerio GN=ugt2a5 PE=3 SV=1;>tr|B8JMA6|B8JMA6_DANRE Novel protein (Zgc:112490) (Fragment) OS=Danio rerio GN=fsd1l PE=3 SV=1;>tr|B8JMA7|B8JMA7_DANRE Novel protein (Zgc:112490) OS=Danio rerio GN=fsd1l		2	2	1	1	1	2	2	2	0	1	1	0	1	1	1	0	0	0	0	0	0	0	0	0	0				0	0	0	203380	170670	157310	0	0	0	0	0	0	0	0	0	0	0	0
310	B8JMB9	>tr|B8JMB9|B8JMB9_DANRE Novel protein similar to vertebrate spectrin, beta, non-erythrocytic 1 (SPTBN1) (Fragment) OS=Danio rerio GN=si:ch73-262h23.4 PE=4 SV=1		2	1	1	1	0	0	0	0	1	1	1	0	2	2	0	0	1	0	0	0	2	0	1	0	0				0	0	0	0	0	0	0	0	0	0	0	0	0	0	0	0	0	0
315	B8XY56	>tr|B8XY56|B8XY56_DANRE RNase Dre2 (Fragment) OS=Danio rerio GN=rnaset2 PE=2 SV=1		2	2	0	0	0	2	1	2	2	2	0	2	2	2	2	2	1	1	2	2	2	2	2	2	1				0	0	0	1700200	0	1829700	1509000	1059900	0	1346000	2826000	2660200	3376000	4592200	0	0	3175200	2098300
355	E7EXG2;F1QIB3	>tr|E7EXG2|E7EXG2_DANRE Uncharacterized protein OS=Danio rerio GN=dbnl PE=4 SV=1;>tr|F1QIB3|F1QIB3_DANRE Uncharacterized protein OS=Danio rerio GN=dbnl PE=4 SV=1		2	2	0	1	0	0	0	0	1	1	0	0	0	0	0	0	0	0	0	1	1	0	0	0	0				0	0	0	0	0	0	0	1296900	0	0	0	0	0	0	0	0	0	0
357	E7EXW9	>tr|E7EXW9|E7EXW9_DANRE Uncharacterized protein OS=Danio rerio GN=pds5b PE=4 SV=1		2	1	1	0	0	0	0	1	1	1	1	0	0	0	1	1	0	0	0	0	0	0	0	0	0				0	0	0	0	0	0	0	0	0	0	0	0	0	0	0	0	0	0
359	E7EY13	>tr|E7EY13|E7EY13_DANRE Choline dehydrogenase OS=Danio rerio GN=CU638702.1 PE=3 SV=1		2	2	1	1	1	2	2	2	1	1	1	0	0	1	1	1	1	0	0	0	0	0	0	1	0				0	0	0	209330	212810	188350	0	0	0	0	0	0	0	0	0	0	0	0
360	E7EYD0;F1QNU3	>tr|E7EYD0|E7EYD0_DANRE Uncharacterized protein OS=Danio rerio GN=OTTDARG00000010170 PE=4 SV=1;>tr|F1QNU3|F1QNU3_DANRE Uncharacterized protein (Fragment) OS=Danio rerio GN=myom1a PE=4 SV=1		2	1	0	1	0	1	1	1	1	1	1	2	1	2	1	1	1	2	1	0	2	1	1	1	0				0	0	0	0	0	0	0	0	0	87481	0	152990	0	0	0	119320	0	0
374	E7EZS4	>tr|E7EZS4|E7EZS4_DANRE Uncharacterized protein OS=Danio rerio GN=CU929036.1 PE=4 SV=1		2	2	0	0	0	0	0	0	1	2	2	0	0	0	0	0	0	0	0	0	0	0	0	0	0				0	0	0	0	0	0	0	134920	140150	0	0	0	0	0	0	0	0	0
69	E7EZW8;A4IGC8;F1QBM9	>tr|E7EZW8|E7EZW8_DANRE Uncharacterized protein OS=Danio rerio GN=OTTDARG00000027405 PE=4 SV=1;>tr|A4IGC8|A4IGC8_DANRE Aldh18a1 protein OS=Danio rerio GN=aldh18a1 PE=2 SV=1;>tr|F1QBM9|F1QBM9_DANRE Uncharacterized protein (Fragment) OS=Danio rerio GN=aldh18		2	2	0	0	0	2	1	1	2	2	2	0	2	1	0	0	1	0	1	0	0	0	0	0	0				0	0	0	43206	0	0	61125	95738	251660	0	35466	0	0	0	0	0	0	0
376	E7F0F1	>tr|E7F0F1|E7F0F1_DANRE Uncharacterized protein OS=Danio rerio GN=CU929052.1 PE=4 SV=1		2	2	2	2	2	0	0	0	0	1	0	0	0	0	0	0	0	0	0	0	0	0	0	0	0				9754400	42659000	7167100	0	0	0	0	0	0	0	0	0	0	0	0	0	0	0
378	E7F0T8;F1QRW0	>tr|E7F0T8|E7F0T8_DANRE Uncharacterized protein OS=Danio rerio GN=OTTDARG00000032782 PE=4 SV=1;>tr|F1QRW0|F1QRW0_DANRE Uncharacterized protein OS=Danio rerio GN=si:dkey-98f17.5 PE=4 SV=1		2	2	2	1	2	2	1	1	0	2	2	0	0	0	1	0	0	0	0	0	0	0	0	0	0				365910	0	485300	0	0	0	0	238700	286510	0	0	0	0	0	0	0	0	0
379	E7F0U0;Q5I2C7	>tr|E7F0U0|E7F0U0_DANRE Uncharacterized protein OS=Danio rerio GN=mbp PE=4 SV=1;>tr|Q5I2C7|Q5I2C7_DANRE Myelin basic protein OS=Danio rerio GN=mbp PE=2 SV=1		2	2	0	0	0	0	0	0	0	0	0	1	1	0	0	0	2	2	1	2	2	2	2	1	0				0	0	0	0	0	0	0	0	0	0	0	0	0	0	904400	981670	0	1365500
389	E7F1D7	>tr|E7F1D7|E7F1D7_DANRE Uncharacterized protein OS=Danio rerio GN=scg2a PE=4 SV=1		2	2	0	0	0	1	0	1	0	0	0	1	0	0	0	0	0	0	1	1	0	1	2	1	1				0	0	0	0	0	0	0	0	0	0	0	0	0	0	0	0	0	0
393	E7F1M5	>tr|E7F1M5|E7F1M5_DANRE Uncharacterized protein OS=Danio rerio GN=CU928042.1 PE=4 SV=1		2	2	0	0	0	0	0	0	1	1	1	1	1	0	2	2	2	0	0	0	0	1	1	1	2				0	0	0	0	0	0	0	0	0	0	0	0	13687000	14642000	864550	0	0	0
398	E7F1Z8	>tr|E7F1Z8|E7F1Z8_DANRE Uncharacterized protein OS=Danio rerio GN=wu:fc26c03 PE=4 SV=1		2	1	1	1	1	2	2	2	1	0	1	0	0	1	1	1	0	1	1	0	2	1	1	1	1				0	0	0	0	0	0	0	0	0	0	0	0	0	0	0	0	0	0
409	E7F2Z5	>tr|E7F2Z5|E7F2Z5_DANRE Phosphorylase OS=Danio rerio GN=CU861445.1 PE=3 SV=1		2	1	1	2	1	1	1	1	2	2	2	0	1	0	0	0	1	0	1	1	0	1	1	0	0				0	0	0	0	0	0	0	0	59002	0	0	0	0	0	0	0	0	0
411	E7F379;F1QQR3	>tr|E7F379|E7F379_DANRE Uncharacterized protein OS=Danio rerio GN=BX000477.1 PE=4 SV=1;>tr|F1QQR3|F1QQR3_DANRE Uncharacterized protein (Fragment) OS=Danio rerio GN=si:ch211-232d10.3 PE=4 SV=1		2	0	1	0	1	0	1	1	1	1	1	0	2	1	0	1	1	2	1	1	1	1	0	0	1				0	0	0	0	0	0	0	0	0	0	0	0	0	0	0	0	0	0
412	E7F3A5	>tr|E7F3A5|E7F3A5_DANRE Uncharacterized protein OS=Danio rerio GN=wu:fb66f03 PE=4 SV=1		2	2	1	0	2	2	2	2	1	2	1	0	0	0	0	0	0	0	0	0	1	0	1	0	0				0	0	0	0	0	0	0	193700	0	0	0	0	0	0	0	0	0	0
415	E7F3G6	>tr|E7F3G6|E7F3G6_DANRE Uncharacterized protein OS=Danio rerio GN=CR854964.1 PE=4 SV=1		2	2	0	0	0	0	0	0	1	2	2	2	2	2	2	2	0	0	0	0	0	1	0	1	0				0	0	0	0	0	0	0	0	0	169120	0	175100	144360	0	0	0	0	0
418	E7F3I3	>tr|E7F3I3|E7F3I3_DANRE Uncharacterized protein OS=Danio rerio GN=CU928126.3 PE=4 SV=1		2	1	2	1	1	1	2	1	1	1	1	1	0	1	1	1	0	0	1	0	0	0	0	0	0				0	0	0	0	0	0	0	0	0	0	0	0	0	0	0	0	22947	0
419	E7F3I8	>tr|E7F3I8|E7F3I8_DANRE Uncharacterized protein OS=Danio rerio GN=dhx15 PE=4 SV=1		2	2	1	2	2	1	1	1	0	2	1	0	1	1	1	0	0	0	0	0	0	0	0	0	0				0	164420	92266	0	0	0	0	38641	0	0	0	0	0	0	0	0	0	0
421	E7F3S5	>tr|E7F3S5|E7F3S5_DANRE Uncharacterized protein OS=Danio rerio GN=CR774179.2 PE=4 SV=1		2	2	0	0	0	2	2	2	1	1	0	2	1	1	1	1	0	0	0	0	0	0	0	0	0				0	0	0	168200	141130	334260	0	0	0	115700	0	0	0	0	0	0	0	0
422	E7F3V5	>tr|E7F3V5|E7F3V5_DANRE Uncharacterized protein OS=Danio rerio GN=BX546446.1 PE=3 SV=1		2	2	2	2	2	0	0	1	0	0	0	0	0	0	0	0	0	0	0	0	0	0	1	0	0				180260	264530	398330	0	0	0	0	0	0	0	0	0	0	0	0	0	0	0
429	E7F4T2;Q5TZ68	>tr|E7F4T2|E7F4T2_DANRE Uncharacterized protein OS=Danio rerio GN=cacna2d1a PE=4 SV=1;>tr|Q5TZ68|Q5TZ68_DANRE Novel protein similar to vertebrate calcium channel, voltage-dependent, alpha 2/delta subunit 1 (CACNA2D1) OS=Danio rerio GN=cacna2d1a PE=4 SV=2		2	2	0	1	1	2	2	2	1	1	1	0	1	1	1	1	2	2	1	0	1	1	1	1	1				0	0	0	283690	218830	241070	0	0	0	0	0	0	0	0	122090	168850	0	0
436	E7F5Q2	>tr|E7F5Q2|E7F5Q2_DANRE Uncharacterized protein OS=Danio rerio GN=CR376783.1 PE=4 SV=1		2	2	2	2	2	2	2	2	1	2	2	2	1	2	1	1	2	2	1	2	1	2	2	2	2				1610200	1189000	1311500	686870	1091800	442490	0	0	385640	0	0	0	0	0	0	0	0	767370
443	E7F6B1	>tr|E7F6B1|E7F6B1_DANRE Uncharacterized protein OS=Danio rerio GN=si:ch1073-464p5.5 PE=4 SV=2		2	1	2	1	2	2	2	2	2	1	1	2	2	2	2	2	1	1	1	1	2	1	2	1	1				0	0	0	0	0	0	0	0	0	0	0	0	0	0	0	0	0	0
445	E7F6D0	>tr|E7F6D0|E7F6D0_DANRE Uncharacterized protein OS=Danio rerio GN=FP016053.1 PE=4 SV=1		2	2	0	0	0	2	2	2	0	0	0	0	0	0	0	0	0	0	0	0	0	0	0	0	0				0	0	0	235720	141800	110290	0	0	0	0	0	0	0	0	0	0	0	0
448	E7F6G9	>tr|E7F6G9|E7F6G9_DANRE Uncharacterized protein OS=Danio rerio GN=uggt2 PE=4 SV=2		2	2	2	2	2	0	0	0	0	1	1	0	0	0	0	0	0	0	0	0	0	0	0	0	0				268330	0	410930	0	0	0	0	0	0	0	0	0	0	0	0	0	0	0
451	E7F6X2	>tr|E7F6X2|E7F6X2_DANRE Uncharacterized protein OS=Danio rerio GN=wu:fc03a11 PE=4 SV=1		2	2	2	2	2	2	2	1	2	2	2	1	1	2	1	1	0	0	0	0	1	0	1	0	0				2977200	3578000	4766700	125160	232650	0	273820	326720	0	0	0	124420	0	0	0	0	0	0
453	E7F791	>tr|E7F791|E7F791_DANRE Uncharacterized protein OS=Danio rerio GN=CU062415.1 PE=4 SV=1		2	2	0	0	0	1	2	1	2	1	1	0	0	1	1	0	1	0	0	0	0	1	0	0	0				0	0	0	0	1320900	0	337970	0	0	0	0	0	0	0	0	0	0	0
455	E7F7D6	>tr|E7F7D6|E7F7D6_DANRE Uncharacterized protein OS=Danio rerio GN=CABZ01065423.1 PE=4 SV=1		2	1	0	0	0	1	2	1	0	0	0	0	0	0	0	0	0	0	0	0	0	0	1	0	0				0	0	0	0	0	0	0	0	0	0	0	0	0	0	0	0	0	0
463	E7F857	>tr|E7F857|E7F857_DANRE Uncharacterized protein OS=Danio rerio GN=CU633848.1 PE=4 SV=1		2	2	0	0	0	1	1	1	1	1	1	2	2	2	2	2	1	2	2	2	2	2	2	1	2				0	0	0	0	0	0	0	0	0	77154	212090	81979	108010	169000	0	48177	137590	118210
470	E7F8L7	>tr|E7F8L7|E7F8L7_DANRE Uncharacterized protein OS=Danio rerio GN=CR450695.1 PE=4 SV=1		2	2	2	2	2	2	2	2	2	2	2	2	2	2	2	2	0	1	2	1	0	1	2	0	1				9299100	3641600	6967700	20865000	10540000	24500000	9970400	14936000	11320000	4154100	2447800	4798100	3729000	4413600	0	0	4317400	0
479	E7F9K6	>tr|E7F9K6|E7F9K6_DANRE Uncharacterized protein OS=Danio rerio GN=CU207301.12 PE=4 SV=1		2	2	0	0	0	0	2	2	0	0	0	0	0	0	0	0	0	0	0	0	0	0	0	0	0				0	0	0	0	0	188670	0	0	0	0	0	0	0	0	0	0	0	0
480	E7F9M4;F1R9Y8;F1QB10;E9QDS1	>tr|E7F9M4|E7F9M4_DANRE Uncharacterized protein OS=Danio rerio GN=hdlbp PE=4 SV=1;>tr|F1R9Y8|F1R9Y8_DANRE Uncharacterized protein OS=Danio rerio GN=hdlbp PE=4 SV=1;>tr|F1QB10|F1QB10_DANRE Uncharacterized protein OS=Danio rerio GN=hdlbp PE=4 SV=1;>tr|E9QDS1		2	2	0	0	0	0	0	1	2	2	2	1	0	2	1	1	1	2	0	0	1	2	2	0	1				0	0	0	0	0	0	63079	72380	80406	0	0	0	0	0	0	47274	0	0
487	E7FAE7	>tr|E7FAE7|E7FAE7_DANRE Uncharacterized protein OS=Danio rerio GN=si:ch211-105c13.3 PE=4 SV=1		2	2	0	0	0	1	1	1	1	2	1	1	0	1	1	0	1	1	0	1	1	1	2	1	1				0	0	0	0	0	0	0	779400	0	0	0	0	0	0	0	0	0	0
489	E7FAI2;E7F9K0;E7F4T3;E7FDN0;E7F6M6;E9QG98;F1Q4Y2;E9QGB3;F1QWP1;F1RB83;E7F5X8;E7FG62;E9QDG4;E9QI48;E7F330;E7FAR5;E7FCS7;E7FCU8;E7FFZ2;E9QCH9;E9QFI3;F1Q4L7;F1QBP8;F1QH35;E7F4D9;F1QC83;E7F8J5;E7FD84;E9QC41;E7F8F9;E7EYZ8;E7F196;E7FDK1;E7F4F3;E7FCN0;F1Q4V6;E7F0S4;E9QDX1;F1QGX2;F1QCN2;F1QLX0;E9QDN8;E9QH46;F1RCD1;F1R836;F1R303;F1QY47;F1Q9M1;E7F4V9;E9QIY5;F1QT11;F1QIX6;F1QJV6;F1R5Y0;F1QGB3;F1QZZ8;F1QAU4;…	>tr|E7FAI2|E7FAI2_DANRE Uncharacterized protein OS=Danio rerio GN=BX000477.3 PE=4 SV=1;>tr|E7F9K0|E7F9K0_DANRE Uncharacterized protein OS=Danio rerio GN=CU658472.1 PE=4 SV=1;>tr|E7F4T3|E7F4T3_DANRE Uncharacterized protein OS=Danio rerio GN=si:ch211-278p9.1		2	1	2	1	2	1	2	2	2	2	2	0	1	2	1	0	2	2	1	1	1	0	1	0	0				385520	0	248770	0	128080	112960	242260	582790	486240	0	0	174180	0	0	165700	181180	0	0
495	E7FAW6	>tr|E7FAW6|E7FAW6_DANRE Uncharacterized protein OS=Danio rerio GN=CABZ01034848.1 PE=4 SV=1		2	2	1	1	1	2	1	1	1	0	1	1	1	0	0	0	0	0	0	0	0	0	0	0	0				0	0	0	5680000	0	0	0	0	0	0	0	0	0	0	0	0	0	0
512	E7FCB6	>tr|E7FCB6|E7FCB6_DANRE Uncharacterized protein OS=Danio rerio GN=CABZ01038928.1 PE=4 SV=1		2	2	2	2	2	2	2	2	0	2	2	0	0	0	0	0	0	1	1	0	0	0	0	0	0				428140	332320	1379600	201260	250310	174570	0	227560	242670	0	0	0	0	0	0	0	0	0
516	E7FCK1	>tr|E7FCK1|E7FCK1_DANRE Uncharacterized protein OS=Danio rerio GN=CABZ01103858.1 PE=4 SV=1		2	2	0	0	0	1	1	1	0	0	0	0	0	0	0	0	2	1	2	2	1	0	1	2	2				0	0	0	0	0	0	0	0	0	0	0	0	0	0	0	0	0	0
157	E7FCQ5;F1QPQ9;B0R0N3;E7F3R6	>tr|E7FCQ5|E7FCQ5_DANRE Uncharacterized protein OS=Danio rerio GN=cpne5 PE=4 SV=1;>tr|F1QPQ9|F1QPQ9_DANRE Uncharacterized protein (Fragment) OS=Danio rerio GN=si:ch211-180j19.1 PE=4 SV=1;>tr|B0R0N3|B0R0N3_DANRE Novel protein similar to vertebrate copine fa		2	1	2	1	2	1	1	1	1	2	2	1	0	1	1	1	1	1	1	0	0	0	1	1	1				0	0	0	0	0	0	0	0	0	0	0	0	0	0	0	0	0	0
522	E7FCW3;Q5TZ35	>tr|E7FCW3|E7FCW3_DANRE Uncharacterized protein OS=Danio rerio GN=im:7159195 PE=4 SV=1;>tr|Q5TZ35|Q5TZ35_DANRE Novel protein similar to vertebrate visinin-like 1 (VSNL1) OS=Danio rerio GN=si:dkey-30j22.11 PE=2 SV=1		2	2	1	1	2	1	1	1	0	0	1	0	0	0	0	0	0	0	0	0	1	0	0	1	0				0	0	726030	0	0	0	0	0	0	0	0	0	0	0	0	0	0	0
532	E7FDY7	>tr|E7FDY7|E7FDY7_DANRE Glucose-6-phosphate 1-dehydrogenase OS=Danio rerio GN=si:dkey-90a13.8 PE=3 SV=1		2	2	1	2	0	0	0	0	0	0	0	0	0	0	0	0	0	0	0	0	0	0	0	0	0				0	222770	0	0	0	0	0	0	0	0	0	0	0	0	0	0	0	0
533	E7FE29	>tr|E7FE29|E7FE29_DANRE Uncharacterized protein OS=Danio rerio GN=myo18l1 PE=4 SV=1		2	2	0	0	0	2	2	2	0	0	0	0	0	0	0	0	0	0	0	0	0	0	0	0	0				0	0	0	765050	256160	1216800	0	0	0	0	0	0	0	0	0	0	0	0
535	E7FE82	>tr|E7FE82|E7FE82_DANRE Uncharacterized protein OS=Danio rerio GN=CR407595.1 PE=4 SV=1		2	2	2	2	2	0	0	0	2	2	2	0	0	0	1	1	0	0	0	0	0	0	0	0	0				4371500	2331500	2586100	0	0	0	1181200	1623000	2238700	0	0	0	0	0	0	0	0	0
541	E7FF10	>tr|E7FF10|E7FF10_DANRE Uncharacterized protein OS=Danio rerio GN=vwa1 PE=4 SV=1		2	2	0	1	1	2	1	2	1	1	1	0	0	0	0	0	1	1	0	1	0	1	1	1	1				0	0	0	0	0	419590	0	0	0	0	0	0	0	0	0	0	0	0
544	E7FF92;F1QCC9	>tr|E7FF92|E7FF92_DANRE Uncharacterized protein OS=Danio rerio GN=CABZ01041610.1 PE=4 SV=1;>tr|F1QCC9|F1QCC9_DANRE Uncharacterized protein OS=Danio rerio GN=syt5b PE=4 SV=1		2	1	1	1	1	0	1	0	0	0	1	1	1	0	0	0	0	0	0	0	0	0	0	0	0				0	0	0	0	0	0	0	0	0	0	73893	0	0	0	0	0	0	0
548	E7FFR1	>tr|E7FFR1|E7FFR1_DANRE Uncharacterized protein OS=Danio rerio GN=comp PE=4 SV=1		2	1	0	0	0	2	1	2	1	0	0	2	2	2	2	1	2	2	0	2	2	2	2	2	2				0	0	0	0	0	0	0	0	0	0	0	0	0	0	0	0	0	0
550	E7FFW0	>tr|E7FFW0|E7FFW0_DANRE Uncharacterized protein OS=Danio rerio GN=CABZ01037726.1 PE=4 SV=1		2	2	0	0	0	0	0	0	1	1	1	2	1	1	2	2	1	1	1	1	0	1	1	1	1				0	0	0	0	0	0	0	0	0	0	0	0	414030	0	0	0	0	0
552	E7FG27;F1Q7R9	>tr|E7FG27|E7FG27_DANRE Uncharacterized protein OS=Danio rerio GN=entpd1 PE=3 SV=1;>tr|F1Q7R9|F1Q7R9_DANRE Uncharacterized protein OS=Danio rerio GN=entpd1 PE=3 SV=1		2	2	1	1	1	1	1	2	1	0	0	0	0	0	0	0	0	0	0	0	0	0	0	0	0				0	0	0	0	0	1224000	0	0	0	0	0	0	0	0	0	0	0	0
553	E7FG48;Q6P604	>tr|E7FG48|E7FG48_DANRE Uncharacterized protein OS=Danio rerio GN=tppp3 PE=4 SV=1;>tr|Q6P604|Q6P604_DANRE Tubulin polymerization-promoting protein family member 3 OS=Danio rerio GN=tppp3 PE=2 SV=1		2	2	0	0	0	0	0	0	0	0	0	2	2	2	1	0	0	0	0	0	1	2	2	2	1				0	0	0	0	0	0	0	0	0	245830	251820	345250	0	0	0	0	0	0
557	E7FGC7	>tr|E7FGC7|E7FGC7_DANRE Uncharacterized protein OS=Danio rerio GN=CABZ01072241.1 PE=4 SV=1		2	2	0	0	0	2	2	2	0	0	0	0	0	2	0	0	0	0	0	0	0	0	1	0	0				0	0	0	432940	248690	607850	0	0	0	0	0	31995	0	0	0	0	0	0
564	E9QB63;Q98SV1	>tr|E9QB63|E9QB63_DANRE Uncharacterized protein OS=Danio rerio GN=sepp1a PE=4 SV=1;>sp|Q98SV1|SELPA_DANRE Selenoprotein Pa OS=Danio rerio GN=sepp1a PE=1 SV=3		2	2	1	0	0	1	0	0	0	0	0	0	1	1	0	0	0	1	1	1	0	1	0	0	0				0	0	0	0	0	0	0	0	0	0	0	98835	0	0	0	0	0	0
586	E9QDV5;B0UXV4	>tr|E9QDV5|E9QDV5_DANRE Uncharacterized protein OS=Danio rerio GN=ggt5 PE=4 SV=1;>tr|B0UXV4|B0UXV4_DANRE Novel protein similar to H.sapiens GGTLA1, gamma-glutamyltransferase-like activity 1 (GGTLA1) OS=Danio rerio GN=ggt5 PE=4 SV=1		2	2	2	1	1	2	2	2	0	0	1	0	0	0	0	0	0	0	0	0	0	0	0	0	0				85728	0	0	499700	357760	283710	0	0	0	0	0	0	0	0	0	0	0	0
587	E9QE12;Q7ZW75	>tr|E9QE12|E9QE12_DANRE Uncharacterized protein OS=Danio rerio GN=tmed2 PE=3 SV=1;>tr|Q7ZW75|Q7ZW75_DANRE Transmembrane emp24 domain trafficking protein 2 OS=Danio rerio GN=tmed2 PE=2 SV=1		2	2	2	2	2	2	2	1	2	2	2	2	2	2	1	1	1	1	1	1	0	0	1	1	0				3249800	2125400	2281500	795230	1477200	0	958140	1049200	840570	625070	565050	558900	0	0	0	0	0	0
589	E9QEQ1	>tr|E9QEQ1|E9QEQ1_DANRE Uncharacterized protein OS=Danio rerio GN=apoc2 PE=4 SV=1		2	2	0	0	0	2	2	2	2	2	1	2	2	2	2	2	2	2	2	2	2	2	2	2	2				0	0	0	234040	94824	298570	120790	97869	0	117850	60740	193400	946360	787780	186920	424130	278900	462200
596	E9QFS3;F1RA35	>tr|E9QFS3|E9QFS3_DANRE Uncharacterized protein OS=Danio rerio GN=macf1 PE=4 SV=1;>tr|F1RA35|F1RA35_DANRE Uncharacterized protein (Fragment) OS=Danio rerio GN=macf1 PE=4 SV=1		2	1	1	1	1	0	0	1	2	2	1	2	1	2	1	1	0	0	0	0	0	0	1	0	0				0	0	0	0	0	0	0	0	0	0	0	0	8710100	0	0	0	0	0
602	E9QGU4;Q7ZYX4;E9QD64	>tr|E9QGU4|E9QGU4_DANRE Uncharacterized protein OS=Danio rerio GN=cct6a PE=3 SV=1;>tr|Q7ZYX4|Q7ZYX4_DANRE Chaperonin containing TCP1, subunit 6A (Zeta 1) OS=Danio rerio GN=cct6a PE=2 SV=1;>tr|E9QD64|E9QD64_DANRE Uncharacterized protein OS=Danio rerio GN=cc		2	2	1	1	1	1	2	1	2	2	1	2	2	2	1	1	1	1	0	1	1	2	1	1	0				0	0	0	0	60482	0	180590	231830	0	206420	299680	428050	0	0	0	0	0	0
604	E9QH64;Q9PTF3;E7F982	>tr|E9QH64|E9QH64_DANRE Nucleoside diphosphate kinase OS=Danio rerio GN=nme3 PE=3 SV=1;>tr|Q9PTF3|Q9PTF3_DANRE Nucleoside diphosphate kinase OS=Danio rerio GN=nme3 PE=2 SV=1;>tr|E7F982|E7F982_DANRE Nucleoside diphosphate kinase OS=Danio rerio GN=nme3 PE=3		2	1	2	2	2	2	2	2	2	2	2	1	2	2	2	1	2	1	1	1	1	1	1	2	1				0	0	0	0	0	0	0	0	0	0	0	0	0	0	0	0	0	0
622	F1Q4M6;F1R163	>tr|F1Q4M6|F1Q4M6_DANRE Uncharacterized protein OS=Danio rerio GN=OTTDARG00000009321 PE=4 SV=1;>tr|F1R163|F1R163_DANRE Uncharacterized protein (Fragment) OS=Danio rerio GN=si:ch211-152m4.1 PE=4 SV=1		2	2	0	0	0	0	0	0	0	0	0	0	1	1	2	2	0	0	0	0	0	0	0	0	0				0	0	0	0	0	0	0	0	0	0	0	0	164870	100700	0	0	0	0
630	F1Q504;Q6AZW5	>tr|F1Q504|F1Q504_DANRE Uncharacterized protein OS=Danio rerio GN=sgcg PE=4 SV=1;>tr|Q6AZW5|Q6AZW5_DANRE Sarcoglycan, gamma OS=Danio rerio GN=sgcg PE=2 SV=1		2	2	0	0	0	2	2	2	0	1	0	0	0	0	0	0	0	0	1	0	1	0	2	0	0				0	0	0	293740	353790	252110	0	0	0	0	0	0	0	0	0	0	0	0
633	F1Q520	>tr|F1Q520|F1Q520_DANRE Uncharacterized protein OS=Danio rerio GN=prkri PE=4 SV=1		2	2	0	0	0	1	0	0	1	0	0	0	0	1	1	0	0	0	0	2	0	1	1	1	0				0	0	0	0	0	0	0	0	0	0	0	0	0	0	0	0	0	205380
16	F1Q5C3;A2AR69	>tr|F1Q5C3|F1Q5C3_DANRE Uncharacterized protein OS=Danio rerio GN=itih5l PE=4 SV=1;>tr|A2AR69|A2AR69_DANRE Novel protein similar to vertebrate inter-alpha (Globulin) inhibitor H family (Plasma Kallikrein-sensitive glycoprotein) (ITIH) (Fragment) OS=Danio r		2	2	0	1	0	2	2	2	2	2	2	2	2	2	1	0	2	2	1	2	1	2	1	1	0				0	0	0	174840	200820	177870	416470	365190	430680	164890	320000	122330	0	0	588870	521670	0	156720
655	F1Q6Y1	>tr|F1Q6Y1|F1Q6Y1_DANRE Uncharacterized protein OS=Danio rerio GN=rgrb PE=4 SV=1		2	2	2	2	1	1	0	0	0	0	0	1	1	1	1	1	0	0	0	1	0	1	1	0	0				1632500	1779600	0	0	0	0	0	0	0	0	0	0	0	0	0	0	0	0
656	F1Q701;Q08CG4;E9QDR2	>tr|F1Q701|F1Q701_DANRE Uncharacterized protein OS=Danio rerio GN=zgc:153112 PE=4 SV=1;>tr|Q08CG4|Q08CG4_DANRE Uncharacterized protein OS=Danio rerio GN=zgc:153112 PE=2 SV=1;>tr|E9QDR2|E9QDR2_DANRE Uncharacterized protein OS=Danio rerio GN=zgc:153112 PE=4		2	2	0	0	0	1	1	1	1	1	2	2	2	2	1	1	1	1	1	1	0	2	1	1	1				0	0	0	0	0	0	0	0	140190	434060	229030	206350	0	0	0	0	0	0
663	F1Q7F9	>tr|F1Q7F9|F1Q7F9_DANRE Uncharacterized protein OS=Danio rerio GN=sypl2a PE=4 SV=1		2	2	2	2	2	0	1	0	2	2	2	2	2	2	0	1	0	0	0	0	0	0	0	0	0				1404100	903970	1718300	0	0	0	624560	3196500	1271200	252360	338170	557640	0	0	0	0	0	0
570	F1Q7H3;F1QJX7;F1RE11;E9QC28	>tr|F1Q7H3|F1Q7H3_DANRE Uncharacterized protein OS=Danio rerio GN=gnas PE=4 SV=1;>tr|F1QJX7|F1QJX7_DANRE Uncharacterized protein OS=Danio rerio GN=gnas PE=4 SV=1;>tr|F1RE11|F1RE11_DANRE Uncharacterized protein OS=Danio rerio GN=gnal PE=4 SV=1;>tr|E9QC28|E9		2	1	2	2	2	2	2	1	2	2	2	1	2	1	1	1	1	1	0	0	0	2	0	0	1				0	0	0	0	0	0	0	0	0	0	0	0	0	0	0	0	0	0
665	F1Q7H4	>tr|F1Q7H4|F1Q7H4_DANRE Uncharacterized protein (Fragment) OS=Danio rerio GN=CABZ01113374.2 PE=4 SV=1		2	2	2	2	2	2	2	2	2	2	2	1	1	1	2	2	0	2	0	2	0	0	2	2	2				89789	107460	89878	100340	87282	119920	651940	524550	156790	0	0	0	349900	173910	0	64102	0	45659
681	F1Q895;E7F0H8	>tr|F1Q895|F1Q895_DANRE Uncharacterized protein OS=Danio rerio GN=hmgb3b PE=4 SV=1;>tr|E7F0H8|E7F0H8_DANRE Uncharacterized protein OS=Danio rerio GN=OTTDARG00000022618 PE=4 SV=2		2	2	1	1	1	2	2	2	2	2	2	2	2	2	2	2	1	0	0	0	0	1	0	0	1				0	0	0	0	0	782420	1154300	464350	584630	1054600	1140700	870910	766690	638850	0	0	0	0
576	F1Q8N0;F1Q6P1;E9QCI4	>tr|F1Q8N0|F1Q8N0_DANRE Uncharacterized protein OS=Danio rerio GN=zgc:65987 PE=3 SV=1;>tr|F1Q6P1|F1Q6P1_DANRE Uncharacterized protein OS=Danio rerio GN=zgc:65987 PE=3 SV=1;>tr|E9QCI4|E9QCI4_DANRE Uncharacterized protein OS=Danio rerio GN=zgc:65987 PE=3 SV=		2	2	2	2	2	2	2	2	0	1	0	0	0	0	0	0	0	0	0	0	0	0	0	0	0				2012900	756880	578600	271900	547040	263880	0	0	0	0	0	0	0	0	0	0	0	0
689	F1Q8W8	>tr|F1Q8W8|F1Q8W8_DANRE Uncharacterized protein OS=Danio rerio GN=calrl2 PE=3 SV=1		2	2	1	0	1	2	2	2	1	0	0	2	2	2	1	2	1	2	2	2	2	2	2	2	2				0	0	0	142850	132800	0	0	0	0	215410	0	152350	0	143320	0	206730	0	262530
691	F1Q931;F1R0U5	>tr|F1Q931|F1Q931_DANRE Uncharacterized protein OS=Danio rerio GN=LARP1B PE=4 SV=1;>tr|F1R0U5|F1R0U5_DANRE Uncharacterized protein OS=Danio rerio GN=larp1 PE=4 SV=1		2	2	1	1	1	1	1	1	0	1	0	0	1	0	0	0	0	0	0	0	0	0	0	0	0				0	0	0	0	0	0	0	0	0	0	72070	0	0	0	0	0	0	0
694	F1Q9A4	>tr|F1Q9A4|F1Q9A4_DANRE Uncharacterized protein OS=Danio rerio GN=cox7a2 PE=4 SV=1		2	2	2	2	2	2	1	2	1	2	2	1	1	1	1	1	0	1	0	0	0	0	2	2	2				840740	1377100	658090	736030	0	637140	0	2861300	2229600	0	0	0	0	0	0	0	0	0
8	F1QAM0;A1A5H6;F1QFA6	>tr|F1QAM0|F1QAM0_DANRE Uncharacterized protein OS=Danio rerio GN=cnot1 PE=4 SV=1;>sp|A1A5H6|CNOT1_DANRE CCR4-NOT transcription complex subunit 1 OS=Danio rerio GN=cnot1 PE=2 SV=1;>tr|F1QFA6|F1QFA6_DANRE Uncharacterized protein OS=Danio rerio GN=cnot1 PE=4		2	2	2	2	2	2	2	2	1	2	1	0	1	1	0	1	0	0	0	0	0	0	0	0	0				0	133300	0	0	48236	0	0	95636	0	0	0	0	0	0	0	0	0	0
714	F1QB02;F1RCI1;F1R9W1;F1Q7A4;F1QNQ4;F1QUN6;F1R8I4;E7EYX8;E9QHX2;E7F967;E7F4H8;E7EZ42;E7FCQ6;E7FDB7;A9JSX9;E7F5Y2;E9QIK7;F1R6C1;E7F5J7;E9QF14;E7FEK8;F1Q4Y8;E7EYN9;E7EZ98;F1Q586;E9QF85;F1QCI5;A8KBU2;E9QBH7;F1QZQ6;E7EZF7;E7EXR4;E7F1K7;E9QEM3;E9QIE1;E9QIH4;E7FH18;F1QI94;F1Q714;F1RAS6;F1QID1;E7F6Q7;E9QI68;E9QJ47;E9QDC7;F1QJB1;E9QH21;F1QC24;E9QBS0;E9QE73;A3KQ66;A5PMW5;E9QBM2;Q5RGE0;A3KQR4;B0S7B1;E7F792;…	>tr|F1QB02|F1QB02_DANRE Uncharacterized protein (Fragment) OS=Danio rerio GN=CR388179.2 PE=4 SV=1;>tr|F1RCI1|F1RCI1_DANRE Uncharacterized protein OS=Danio rerio GN=si:dkey-41c6.3 PE=4 SV=1;>tr|F1R9W1|F1R9W1_DANRE Uncharacterized protein (Fragment) OS=Danio		2	1	1	1	0	1	0	1	0	0	0	0	1	0	0	1	0	1	0	1	1	2	0	0	1				0	0	0	0	0	0	0	0	0	0	0	0	0	0	0	0	0	0
718	F1QBC0;Q5RH91	>tr|F1QBC0|F1QBC0_DANRE Uncharacterized protein OS=Danio rerio GN=plxnb2a PE=4 SV=1;>tr|Q5RH91|Q5RH91_DANRE Novel protein similar to vertebrate plexin B1 (PLXNB1) (Fragment) OS=Danio rerio GN=plxnb2a PE=2 SV=1		2	2	1	1	1	2	2	2	0	1	1	1	1	1	0	0	0	0	0	0	0	0	1	1	0				0	0	0	213720	203880	162750	0	0	0	0	0	0	0	0	0	0	0	0
723	F1QBU4	>tr|F1QBU4|F1QBU4_DANRE Uncharacterized protein (Fragment) OS=Danio rerio GN=CU633767.2 PE=4 SV=1		2	2	0	0	0	0	0	0	0	0	0	0	0	1	0	0	0	0	0	0	2	0	0	0	0				0	0	0	0	0	0	0	0	0	0	0	0	0	0	0	0	0	0
1683	REV__F1QC38;REV__F1R7J6	>tr|F1QC38|F1QC38_DANRE Uncharacterized protein (Fragment) OS=Danio rerio GN=syne1a PE=4 SV=1;>tr|F1R7J6|F1R7J6_DANRE Uncharacterized protein (Fragment) OS=Danio rerio GN=syne1a PE=4 SV=1		2	2	1	1	1	1	1	1	1	1	1	1	1	2	1	1	2	1	1	1	1	2	1	1	2		+		0	0	0	0	0	0	0	0	0	0	0	0	0	0	0	0	0	0
727	F1QC72;F1QAN4	>tr|F1QC72|F1QC72_DANRE Uncharacterized protein OS=Danio rerio GN=agps PE=4 SV=1;>tr|F1QAN4|F1QAN4_DANRE Uncharacterized protein (Fragment) OS=Danio rerio GN=agps PE=4 SV=1		2	2	1	1	1	2	2	2	0	1	1	0	0	0	0	0	0	1	0	0	0	0	0	0	0				0	0	0	189230	191480	154490	0	0	0	0	0	0	0	0	0	0	0	0
728	F1QC76	>tr|F1QC76|F1QC76_DANRE Uncharacterized protein OS=Danio rerio GN=mmp9 PE=4 SV=1		2	2	1	1	1	1	0	1	2	2	2	1	2	2	1	1	1	1	1	1	1	1	1	1	1				0	0	0	0	0	0	876610	320590	891490	0	110250	97537	0	0	0	0	0	0
735	F1QCE9	>tr|F1QCE9|F1QCE9_DANRE Acyl carrier protein OS=Danio rerio GN=ndufab1 PE=3 SV=1		2	2	0	0	0	0	0	1	2	0	0	0	0	0	0	0	0	0	0	0	0	0	2	1	1				0	0	0	0	0	0	193170	0	0	0	0	0	0	0	0	0	0	0
744	F1QCT0;Q6NWD4	>tr|F1QCT0|F1QCT0_DANRE Uncharacterized protein OS=Danio rerio GN=timm50 PE=4 SV=1;>sp|Q6NWD4|TIM50_DANRE Mitochondrial import inner membrane translocase subunit TIM50 OS=Danio rerio GN=timm50 PE=2 SV=2		2	2	1	1	1	1	2	1	0	1	1	1	1	0	0	0	1	0	0	0	0	0	0	0	0				0	0	0	0	137920	0	0	0	0	0	0	0	0	0	0	0	0	0
750	F1QDC6	>tr|F1QDC6|F1QDC6_DANRE Uncharacterized protein (Fragment) OS=Danio rerio GN=CU928083.2 PE=4 SV=1		2	2	2	2	2	1	1	1	0	1	1	0	0	1	1	0	0	0	0	0	0	0	0	0	0				0	0	344230	0	0	0	0	0	0	0	0	0	0	0	0	0	0	0
751	F1QDD9	>tr|F1QDD9|F1QDD9_DANRE Uncharacterized protein (Fragment) OS=Danio rerio GN=gfpt1 PE=4 SV=1		2	2	0	1	1	0	0	0	2	2	2	0	0	0	0	0	0	0	0	0	0	0	0	0	0				0	0	0	0	0	0	212890	301010	319920	0	0	0	0	0	0	0	0	0
761	F1QE91	>tr|F1QE91|F1QE91_DANRE Uncharacterized protein OS=Danio rerio GN=zgc:175280 PE=4 SV=1		2	2	1	1	1	2	2	2	0	0	1	1	1	2	1	1	0	0	0	0	0	1	1	0	0				0	0	0	1067300	660830	0	0	0	0	0	0	0	0	0	0	0	0	0
766	F1QEG0	>tr|F1QEG0|F1QEG0_DANRE Uncharacterized protein OS=Danio rerio GN=uts2a PE=3 SV=1		2	2	0	0	0	0	0	0	0	0	0	0	0	0	0	0	0	0	0	1	0	1	1	1	2				0	0	0	0	0	0	0	0	0	0	0	0	0	0	0	0	0	0
767	F1QEG7	>tr|F1QEG7|F1QEG7_DANRE Uncharacterized protein (Fragment) OS=Danio rerio GN=BX649554.4 PE=4 SV=1		2	2	0	0	0	0	0	1	0	0	0	1	1	1	0	0	0	0	0	2	2	1	2	2	1				0	0	0	0	0	0	0	0	0	0	0	0	0	0	0	0	0	153760
769	F1QEK7	>tr|F1QEK7|F1QEK7_DANRE Uncharacterized protein (Fragment) OS=Danio rerio GN=CABZ01072242.1 PE=3 SV=1		2	2	0	0	0	2	2	2	1	1	1	1	1	1	0	0	1	1	1	1	1	1	1	1	1				0	0	0	768370	989450	1171700	0	0	0	0	0	0	0	0	0	0	0	0
775	F1QEY7;F1QE30	>tr|F1QEY7|F1QEY7_DANRE Uncharacterized protein OS=Danio rerio GN=atp6v0a1a PE=4 SV=1;>tr|F1QE30|F1QE30_DANRE Uncharacterized protein OS=Danio rerio GN=atp6v0a1b PE=4 SV=1		2	2	1	2	2	2	2	2	1	1	1	1	0	1	0	0	0	0	0	0	0	0	1	0	0				0	261460	150140	79539	96970	109180	0	0	0	0	0	0	0	0	0	0	0	0
780	F1QFC0	>tr|F1QFC0|F1QFC0_DANRE Uncharacterized protein OS=Danio rerio GN=hspa9 PE=3 SV=1		2	2	2	2	2	1	1	1	2	2	2	2	1	2	1	2	2	1	0	0	1	0	1	1	1				0	298330	0	0	0	0	0	0	0	85929	0	0	0	0	0	0	0	0
34	F1QFR7;A2BIK1;A2BIK2	>tr|F1QFR7|F1QFR7_DANRE Beta-galactosidase (Fragment) OS=Danio rerio GN=si:dkey-224e22.2 PE=3 SV=1;>tr|A2BIK1|A2BIK1_DANRE Beta-galactosidase OS=Danio rerio GN=si:dkey-224e22.2 PE=3 SV=1;>tr|A2BIK2|A2BIK2_DANRE Novel protein similar to vertebrate galactosi		2	2	2	2	0	0	0	0	0	0	0	0	0	0	0	0	1	1	0	1	0	1	0	0	0				188410	608600	0	0	0	0	0	0	0	0	0	0	0	0	0	0	0	0
798	F1QGE4	>tr|F1QGE4|F1QGE4_DANRE Uncharacterized protein OS=Danio rerio GN=AL929341.1 PE=4 SV=1		2	2	0	0	0	0	0	0	0	0	0	2	2	2	1	0	0	0	0	0	1	2	1	0	0				0	0	0	0	0	0	0	0	0	309320	220620	316070	0	0	0	0	0	0
799	F1QGG3	>tr|F1QGG3|F1QGG3_DANRE Uncharacterized protein OS=Danio rerio GN=nsfb PE=3 SV=1		2	1	2	2	2	2	2	2	1	1	1	1	1	2	1	1	1	1	0	0	0	0	0	0	0				159950	0	326900	0	0	0	0	0	0	0	0	0	0	0	0	0	0	0
1	F1QGH9;A0AUR6	>tr|F1QGH9|F1QGH9_DANRE Uncharacterized protein OS=Danio rerio GN=psmd11b PE=4 SV=1;>tr|A0AUR6|A0AUR6_DANRE Psmd11a protein (Fragment) OS=Danio rerio GN=psmd11a PE=2 SV=1		2	2	1	2	1	2	2	2	1	2	2	2	1	0	1	0	1	0	1	1	1	1	1	1	0				0	241750	0	122320	109830	127180	0	338450	874260	211440	0	0	0	0	0	0	0	0
801	F1QGM0;F1QIA9;F1Q9Y2	>tr|F1QGM0|F1QGM0_DANRE Uncharacterized protein OS=Danio rerio GN=lgals1l1 PE=4 SV=1;>tr|F1QIA9|F1QIA9_DANRE Uncharacterized protein (Fragment) OS=Danio rerio GN=CABZ01043822.1 PE=4 SV=1;>tr|F1Q9Y2|F1Q9Y2_DANRE Uncharacterized protein (Fragment) OS=Danio r		2	2	0	0	0	0	0	0	1	0	1	2	2	2	2	2	0	1	0	1	1	1	1	1	1				0	0	0	0	0	0	0	0	0	1795600	1206300	1620700	883520	777940	0	0	0	0
804	F1QGU5;Q6NW89;Q7T3H0;F1QLZ0;Q6I6N0	>tr|F1QGU5|F1QGU5_DANRE Uncharacterized protein OS=Danio rerio GN=mafg1 PE=3 SV=1;>tr|Q6NW89|Q6NW89_DANRE Transcription factor mafG2 OS=Danio rerio GN=mafg2 PE=2 SV=1;>tr|Q7T3H0|Q7T3H0_DANRE Transcription factor mafT OS=Danio rerio GN=maff PE=2 SV=1;>tr|F1		2	2	0	0	0	1	1	1	1	2	2	2	2	1	2	2	2	1	1	1	1	1	1	1	1				0	0	0	0	0	0	0	0	0	0	0	0	0	0	2622200	0	0	0
806	F1QGY9;F1QHX2	>tr|F1QGY9|F1QGY9_DANRE Uncharacterized protein OS=Danio rerio GN=loxl5b PE=4 SV=1;>tr|F1QHX2|F1QHX2_DANRE Uncharacterized protein OS=Danio rerio GN=loxl5b PE=4 SV=1		2	2	0	0	0	2	2	2	0	0	0	2	2	1	0	0	0	0	0	0	1	1	1	0	0				0	0	0	0	0	247990	0	0	0	151890	0	0	0	0	0	0	0	0
808	F1QH34;Q7ZVA6	>tr|F1QH34|F1QH34_DANRE Uncharacterized protein OS=Danio rerio GN=eif4a3 PE=3 SV=1;>sp|Q7ZVA6|IF4A3_DANRE Eukaryotic initiation factor 4A-III OS=Danio rerio GN=eif4a3 PE=2 SV=1		2	2	1	1	1	2	2	1	2	1	1	0	1	1	0	0	0	0	0	0	0	0	1	1	0				0	0	0	0	0	0	118670	0	0	0	0	0	0	0	0	0	0	0
814	F1QHE9	>tr|F1QHE9|F1QHE9_DANRE Uncharacterized protein (Fragment) OS=Danio rerio GN=ndufs7 PE=3 SV=1		2	2	1	2	0	2	1	1	1	1	2	1	1	1	1	1	2	1	2	0	1	0	1	1	2				0	137350	0	129370	0	0	0	0	296720	0	0	0	0	0	191320	0	0	0
817	F1QHH6;Q1RLY6	>tr|F1QHH6|F1QHH6_DANRE Uncharacterized protein OS=Danio rerio GN=kmo PE=4 SV=1;>sp|Q1RLY6|KMO_DANRE Kynurenine 3-monooxygenase OS=Danio rerio GN=kmo PE=2 SV=1		2	2	1	0	1	1	2	0	0	2	2	0	0	0	0	0	0	0	0	0	0	0	0	0	0				0	0	0	0	355530	0	0	441700	0	0	0	0	0	0	0	0	0	0
827	F1QIB2;Q6PUS3	>tr|F1QIB2|F1QIB2_DANRE Uncharacterized protein OS=Danio rerio GN=cstf3 PE=4 SV=1;>tr|Q6PUS3|Q6PUS3_DANRE Cleavage stimulation factor, 3 pre-RNA, subunit 3, 77kDa OS=Danio rerio GN=cstf3 PE=2 SV=1		2	2	1	1	1	0	0	0	0	0	0	0	0	0	0	0	0	0	0	0	0	0	0	0	0				0	0	64028	0	0	0	0	0	0	0	0	0	0	0	0	0	0	0
829	F1QIJ2;Q7T322	>tr|F1QIJ2|F1QIJ2_DANRE Uncharacterized protein OS=Danio rerio GN=naa35 PE=4 SV=1;>sp|Q7T322|NAA35_DANRE N-alpha-acetyltransferase 35, NatC auxiliary subunit OS=Danio rerio GN=naa35 PE=1 SV=1		2	2	1	0	1	0	0	1	0	0	0	1	1	1	1	1	0	0	0	1	1	1	0	1	1				0	0	0	0	0	0	0	0	0	0	0	0	0	0	0	0	0	0
846	F1QJG3;F1R1U9;F1QPH1;Q1LUQ5;F1QBP4;F1QVU8;Q1LUQ6	>tr|F1QJG3|F1QJG3_DANRE Uncharacterized protein (Fragment) OS=Danio rerio GN=si:dkey-21e2.13 PE=3 SV=1;>tr|F1R1U9|F1R1U9_DANRE Uncharacterized protein (Fragment) OS=Danio rerio GN=si:dkey-21e2.13 PE=3 SV=1;>tr|F1QPH1|F1QPH1_DANRE Uncharacterized protein (F		2	2	1	1	1	2	2	2	1	0	1	1	0	0	0	0	0	1	0	1	0	0	0	0	0				0	0	0	565280	500460	600330	0	0	0	0	0	0	0	0	0	0	0	0
1685	REV__F1QJH1	>tr|F1QJH1|F1QJH1_DANRE Uncharacterized protein (Fragment) OS=Danio rerio GN=CU571066.1 PE=4 SV=1		2	2	0	0	0	0	0	0	0	0	0	0	0	0	0	0	0	1	1	1	1	0	1	0	0		+		0	0	0	0	0	0	0	0	0	0	0	0	0	0	0	0	0	0
851	F1QJQ2;F1QUQ7	>tr|F1QJQ2|F1QJQ2_DANRE Uncharacterized protein OS=Danio rerio GN=psmc3 PE=3 SV=1;>tr|F1QUQ7|F1QUQ7_DANRE Uncharacterized protein OS=Danio rerio GN=psmc3 PE=3 SV=1		2	2	0	1	1	0	1	0	2	2	1	2	2	1	2	2	0	0	0	0	1	1	2	0	0				0	0	0	0	0	0	109530	61302	0	48468	84322	0	62489	52000	0	0	0	0
132	F1QKF5;A8KBS0;E9QE54;Q4V957;A9ULS4;E9QIN4;F1RDG8;Q5BJD1	>tr|F1QKF5|F1QKF5_DANRE Uncharacterized protein OS=Danio rerio GN=rab6ba PE=3 SV=1;>tr|A8KBS0|A8KBS0_DANRE Uncharacterized protein OS=Danio rerio GN=zgc:63637 PE=2 SV=1;>tr|E9QE54|E9QE54_DANRE Uncharacterized protein OS=Danio rerio GN=zgc:63637 PE=3 SV=1;>		2	1	2	1	1	1	2	1	2	2	1	2	2	2	2	1	1	0	0	0	1	0	0	0	0				0	0	0	0	0	0	0	0	0	0	0	0	27258	0	0	0	0	0
866	F1QKN6	>tr|F1QKN6|F1QKN6_DANRE Uncharacterized protein OS=Danio rerio GN=gpc4 PE=3 SV=1		2	2	1	1	1	0	0	0	1	1	0	0	1	0	0	0	0	0	0	0	0	0	1	0	0				0	0	0	0	0	0	0	0	0	0	13659	0	0	0	0	0	0	0
81	F1QKX6;F1QVK5;A5PN57;Q6TGW5	>tr|F1QKX6|F1QKX6_DANRE Uncharacterized protein OS=Danio rerio GN=ostf1 PE=4 SV=1;>tr|F1QVK5|F1QVK5_DANRE Uncharacterized protein OS=Danio rerio GN=ostf1 PE=4 SV=1;>tr|A5PN57|A5PN57_DANRE Osteoclast stimulating factor 1 OS=Danio rerio GN=ostf1 PE=4 SV=1;>s		2	2	0	0	0	2	2	2	2	0	0	1	1	2	1	2	1	2	2	2	2	2	2	2	2				0	0	0	26803	21117	33773	22809	0	0	0	0	31970	0	34741	0	95395	290210	242070
887	F1QND1	>tr|F1QND1|F1QND1_DANRE Uncharacterized protein OS=Danio rerio GN=TMX4 PE=4 SV=1		2	2	2	2	2	0	1	2	1	1	1	0	0	0	0	0	0	0	0	0	0	0	0	0	0				1189300	1238700	1849800	0	0	299800	0	0	0	0	0	0	0	0	0	0	0	0
889	F1QNH1	>tr|F1QNH1|F1QNH1_DANRE Uncharacterized protein (Fragment) OS=Danio rerio GN=CR391977.1 PE=4 SV=1		2	2	0	0	0	0	0	0	0	0	0	2	2	1	1	1	0	0	0	1	1	1	0	0	0				0	0	0	0	0	0	0	0	0	0	81102	0	0	0	0	0	0	0
1687	REV__F1QNI6;REV__F1QBV0	>tr|F1QNI6|F1QNI6_DANRE Uncharacterized protein (Fragment) OS=Danio rerio GN=ccdc33 PE=4 SV=1;>tr|F1QBV0|F1QBV0_DANRE Uncharacterized protein OS=Danio rerio GN=ccdc33 PE=4 SV=1		2	2	2	1	1	1	0	1	1	1	1	0	1	0	0	0	0	1	0	0	0	0	0	1	0		+		6205600	0	0	0	0	0	0	0	0	0	0	0	0	0	0	0	0	0
904	F1QQ56	>tr|F1QQ56|F1QQ56_DANRE Uncharacterized protein (Fragment) OS=Danio rerio GN=CR759748.1 PE=4 SV=1		2	2	0	0	0	0	0	0	0	0	0	0	0	1	2	2	2	0	0	0	2	0	2	0	1				0	0	0	0	0	0	0	0	0	0	0	0	617830	0	0	0	0	0
109	F1QQR7;F1QT98;A8DZ95;E7F9X3;F1QR62;E7F5N5	>tr|F1QQR7|F1QQR7_DANRE Uncharacterized protein (Fragment) OS=Danio rerio GN=dpysl2b PE=4 SV=1;>tr|F1QT98|F1QT98_DANRE Uncharacterized protein OS=Danio rerio GN=dpysl2b PE=4 SV=1;>tr|A8DZ95|A8DZ95_DANRE Novel protein similar to vertebrate dihydropyrimidina		2	2	1	0	1	0	0	0	0	0	0	1	2	2	1	0	1	0	0	0	1	1	0	0	0				0	0	0	0	0	0	0	0	0	0	264360	293840	0	0	0	0	0	0
918	F1QRP7	>tr|F1QRP7|F1QRP7_DANRE Uncharacterized protein OS=Danio rerio GN=tas1r2.2 PE=3 SV=1		2	2	1	1	1	1	1	1	0	2	1	1	1	1	1	1	1	1	1	1	1	1	1	0	0				0	0	0	0	0	0	0	3755900	0	0	0	0	0	0	0	0	0	0
922	F1QS69	>tr|F1QS69|F1QS69_DANRE Uncharacterized protein OS=Danio rerio GN=NDUFA13 PE=4 SV=1		2	2	1	1	1	2	2	1	1	2	2	2	1	2	1	1	1	1	1	0	1	0	1	1	1				0	0	0	278240	187060	0	0	443480	454640	209830	0	339180	0	0	0	0	0	0
929	F1QSF1	>tr|F1QSF1|F1QSF1_DANRE Uncharacterized protein OS=Danio rerio GN=mfap2 PE=4 SV=1		2	2	1	1	1	2	2	2	2	1	2	2	2	2	2	2	2	2	1	1	1	1	1	1	1				0	0	0	7885600	7220900	24010000	6121300	0	3012600	3684400	4845100	4372500	4243300	4307800	4756300	2965000	0	0
933	F1QSW6	>tr|F1QSW6|F1QSW6_DANRE Uncharacterized protein (Fragment) OS=Danio rerio GN=FP103011.1 PE=4 SV=1		2	2	2	2	2	2	2	2	2	2	2	1	1	2	2	1	2	0	0	0	1	1	0	0	0				868330	1147400	1067200	289370	183040	146760	117660	268830	250770	0	0	93449	61755	0	49885	0	0	0
940	F1QTE0;Q5SNR1	>tr|F1QTE0|F1QTE0_DANRE Uncharacterized protein OS=Danio rerio GN=si:dkey-12h9.13 PE=4 SV=1;>tr|Q5SNR1|Q5SNR1_DANRE Novel protein similar to vertebrate transcriptional regulating factor 1 (TRERF1) OS=Danio rerio GN=si:dkey-12h9.13 PE=2 SV=1		2	2	0	0	0	0	0	0	0	0	0	0	0	0	1	0	1	1	1	1	0	0	0	0	1				0	0	0	0	0	0	0	0	0	0	0	0	0	0	0	0	0	0
965	F1QVR7;Q6NV26;E9QEZ8	>tr|F1QVR7|F1QVR7_DANRE Uncharacterized protein OS=Danio rerio GN=sdad1 PE=4 SV=1;>sp|Q6NV26|SDA1_DANRE Protein SDA1 homolog OS=Danio rerio GN=sdad1 PE=2 SV=1;>tr|E9QEZ8|E9QEZ8_DANRE Uncharacterized protein OS=Danio rerio GN=sdad1 PE=4 SV=1		2	2	0	0	0	1	0	1	0	0	0	1	2	1	1	1	1	1	0	1	0	1	1	1	0				0	0	0	0	0	0	0	0	0	0	77510	0	0	0	0	0	0	0
520	F1QW36;F1QGI4;E7FCU0;E9QGH7	>tr|F1QW36|F1QW36_DANRE Uncharacterized protein OS=Danio rerio GN=npm1 PE=4 SV=1;>tr|F1QGI4|F1QGI4_DANRE Uncharacterized protein OS=Danio rerio GN=npm1 PE=4 SV=1;>tr|E7FCU0|E7FCU0_DANRE Uncharacterized protein OS=Danio rerio GN=npm1 PE=4 SV=1;>tr|E9QGH7|E9		2	2	0	0	0	2	2	2	2	2	2	2	1	2	2	1	1	1	1	1	0	1	0	0	1				0	0	0	0	0	0	1326800	0	182500	680920	0	0	0	0	0	0	0	0
974	F1QX19	>tr|F1QX19|F1QX19_DANRE Uncharacterized protein OS=Danio rerio GN=zmpste24 PE=4 SV=1		2	2	2	2	2	2	2	2	2	1	2	1	1	1	1	1	0	1	0	0	0	0	0	0	0				1441200	764750	695670	554350	743620	352830	185920	0	337660	0	0	0	0	0	0	0	0	0
975	F1QX57;Q6ZM34	>tr|F1QX57|F1QX57_DANRE Uncharacterized protein OS=Danio rerio GN=vps35 PE=4 SV=1;>tr|Q6ZM34|Q6ZM34_DANRE Novel protein simlar to human and mouse vacuolar protein sorting 35 (Yeast) (VPS35) OS=Danio rerio GN=vps35 PE=2 SV=1		2	2	2	2	2	2	1	1	0	0	0	0	0	0	0	0	0	0	0	0	0	0	0	0	0				367200	353200	254920	164620	0	0	0	0	0	0	0	0	0	0	0	0	0	0
692	F1QXI4;Q3LSS0;F1Q987	>tr|F1QXI4|F1QXI4_DANRE Uncharacterized protein OS=Danio rerio GN=cwf19l2 PE=4 SV=1;>sp|Q3LSS0|C19L2_DANRE CWF19-like protein 2 OS=Danio rerio GN=cwf19l2 PE=2 SV=1;>tr|F1Q987|F1Q987_DANRE Uncharacterized protein (Fragment) OS=Danio rerio GN=cwf19l2 PE=4 SV		2	2	0	0	0	0	0	1	0	0	0	1	1	1	2	1	1	0	0	0	0	0	0	0	0				0	0	0	0	0	0	0	0	0	0	0	0	207170	0	0	0	0	0
984	F1QY27	>tr|F1QY27|F1QY27_DANRE Uncharacterized protein OS=Danio rerio GN=h1fx PE=3 SV=1		2	2	1	1	1	1	1	1	2	2	2	1	1	1	1	1	2	1	1	1	1	1	1	1	1				0	0	0	0	0	0	0	686930	858050	0	0	0	0	0	1226100	0	0	0
997	F1QZ93;Q4V8Y6	>tr|F1QZ93|F1QZ93_DANRE Uncharacterized protein OS=Danio rerio GN=zgc:114085 PE=4 SV=1;>sp|Q4V8Y6|ERGI1_DANRE Endoplasmic reticulum-Golgi intermediate compartment protein 1 OS=Danio rerio GN=ergic1 PE=2 SV=1		2	2	2	2	2	2	2	2	1	1	1	0	0	2	1	0	0	0	0	0	0	0	0	0	0				1156900	1201900	623000	519100	457780	443860	0	0	0	0	0	199940	0	0	0	0	0	0
1008	F1R0C2	>tr|F1R0C2|F1R0C2_DANRE Uncharacterized protein (Fragment) OS=Danio rerio GN=si:ch211-127i16.2 PE=4 SV=1		2	2	1	1	1	2	2	1	1	2	2	0	1	1	0	0	0	0	0	0	0	0	1	0	0				0	0	0	0	0	0	0	0	450090	0	0	0	0	0	0	0	0	0
1010	F1R0Q0	>tr|F1R0Q0|F1R0Q0_DANRE Uncharacterized protein OS=Danio rerio GN=syt2a PE=4 SV=1		2	1	2	2	2	1	1	1	1	1	1	0	1	1	0	0	0	0	0	0	0	0	0	0	0				0	0	0	0	0	0	0	0	0	0	0	26115	0	0	0	0	0	0
296	F1R101;B8JL46;E7F4I4;E7EYD8;F1QX94;F1QF82	>tr|F1R101|F1R101_DANRE Uncharacterized protein OS=Danio rerio GN=zgc:158450 PE=4 SV=1;>tr|B8JL46|B8JL46_DANRE Novel protein (Zgc:158450) OS=Danio rerio GN=CH73-211A15.2 PE=4 SV=1;>tr|E7F4I4|E7F4I4_DANRE Uncharacterized protein OS=Danio rerio GN=CABZ010850		2	2	2	1	1	1	1	2	1	1	1	1	1	1	1	1	0	1	0	1	0	1	1	0	0				80783	0	0	0	0	87566	0	0	0	0	0	0	0	0	0	0	0	0
1011	F1R107	>tr|F1R107|F1R107_DANRE Uncharacterized protein (Fragment) OS=Danio rerio GN=CU607104.2 PE=4 SV=1		2	1	0	1	0	1	1	1	2	1	2	2	1	2	1	1	2	2	1	1	2	1	1	1	0				0	0	0	0	0	0	0	0	0	0	0	0	0	0	0	0	0	0
1023	F1R2I7	>tr|F1R2I7|F1R2I7_DANRE Uncharacterized protein (Fragment) OS=Danio rerio GN=CT583642.1 PE=4 SV=1		2	2	0	0	1	0	0	0	0	0	1	0	1	1	0	1	0	0	0	0	0	0	0	0	0				0	0	254560	0	0	0	0	0	0	0	0	0	0	0	0	0	0	0
1028	F1R2U1;Q5U3I0	>tr|F1R2U1|F1R2U1_DANRE Uncharacterized protein OS=Danio rerio GN=samm50l PE=4 SV=1;>sp|Q5U3I0|SAM5B_DANRE Sorting and assembly machinery component 50 homolog B OS=Danio rerio GN=samm50b PE=2 SV=1		2	1	2	2	2	2	2	2	1	2	2	1	1	2	0	0	1	1	0	0	0	0	1	1	1				0	0	0	0	0	0	0	0	0	0	0	0	0	0	0	0	0	0
1040	F1R3J9;F1QFJ1	>tr|F1R3J9|F1R3J9_DANRE Uncharacterized protein OS=Danio rerio GN=prmt1 PE=4 SV=1;>tr|F1QFJ1|F1QFJ1_DANRE Uncharacterized protein (Fragment) OS=Danio rerio GN=prmt1 PE=4 SV=1		2	2	1	1	1	0	0	0	1	1	1	0	1	0	0	0	0	0	0	0	0	0	0	0	0				0	312100	0	0	0	0	0	0	0	0	0	0	0	0	0	0	0	0
1041	F1R3P1;Q6IQH9	>tr|F1R3P1|F1R3P1_DANRE Uncharacterized protein OS=Danio rerio GN=tmed4 PE=3 SV=1;>tr|Q6IQH9|Q6IQH9_DANRE Uncharacterized protein OS=Danio rerio GN=tmed4 PE=2 SV=1		2	1	2	2	2	1	2	1	2	2	2	1	1	1	1	1	0	0	0	0	0	0	1	0	0				0	0	0	0	0	0	0	0	91306	0	0	0	0	0	0	0	0	0
1044	F1R444;E7FGI7	>tr|F1R444|F1R444_DANRE Uncharacterized protein OS=Danio rerio GN=prkca PE=4 SV=1;>tr|E7FGI7|E7FGI7_DANRE Uncharacterized protein OS=Danio rerio GN=FP325113.1 PE=4 SV=1		2	2	2	2	1	2	2	2	1	1	1	0	0	0	0	0	0	1	0	0	1	0	1	0	1				201710	193240	0	244060	230260	276790	0	0	0	0	0	0	0	0	0	0	0	0
1048	F1R4C3;F1QEB3	>tr|F1R4C3|F1R4C3_DANRE Uncharacterized protein (Fragment) OS=Danio rerio GN=CU639413.3 PE=3 SV=1;>tr|F1QEB3|F1QEB3_DANRE Uncharacterized protein (Fragment) OS=Danio rerio GN=CABZ01079477.1 PE=3 SV=1		2	2	2	2	1	1	1	0	0	1	0	1	0	0	0	0	0	1	0	0	0	0	1	0	0				145880	189680	0	0	0	0	0	0	0	0	0	0	0	0	0	0	0	0
1050	F1R4G2	>tr|F1R4G2|F1R4G2_DANRE Uncharacterized protein OS=Danio rerio GN=blmh PE=4 SV=1		2	2	2	2	2	0	0	0	0	0	0	0	0	0	0	0	0	0	0	0	0	0	0	0	0				884100	1906900	0	0	0	0	0	0	0	0	0	0	0	0	0	0	0	0
1056	F1R4U0;E7FFZ9;F1QEP1	>tr|F1R4U0|F1R4U0_DANRE Uncharacterized protein (Fragment) OS=Danio rerio GN=CR450714.1 PE=3 SV=1;>tr|E7FFZ9|E7FFZ9_DANRE Uncharacterized protein OS=Danio rerio GN=si:dkey-178e17.1 PE=3 SV=1;>tr|F1QEP1|F1QEP1_DANRE Uncharacterized protein (Fragment) OS=Dan		2	2	2	2	2	1	2	1	2	2	2	0	0	1	0	0	0	0	0	0	0	0	0	0	0				722410	0	0	0	448350	0	0	722900	695180	0	0	0	0	0	0	0	0	0
910	F1R5H6;F1QQP6;A8CYR1;F1QDW1;F1RBU8;F1RBE2;F1QC86;E7F3R5;E7F9T9	>tr|F1R5H6|F1R5H6_DANRE Uncharacterized protein OS=Danio rerio GN=brd4 PE=4 SV=1;>tr|F1QQP6|F1QQP6_DANRE Uncharacterized protein OS=Danio rerio GN=brd3a PE=4 SV=1;>tr|A8CYR1|A8CYR1_DANRE Bromodomain-containing protein 2a OS=Danio rerio GN=brd2a PE=2 SV=1;>		2	2	0	0	0	1	1	0	1	0	1	2	2	2	0	0	0	0	0	0	0	0	0	0	0				0	0	0	0	0	0	0	0	0	426880	275590	0	0	0	0	0	0	0
204	F1R5M2;E7EYD7;B0UYK4	>tr|F1R5M2|F1R5M2_DANRE Uncharacterized protein OS=Danio rerio GN=kif5ba PE=3 SV=1;>tr|E7EYD7|E7EYD7_DANRE Uncharacterized protein OS=Danio rerio GN=kif5bb PE=3 SV=1;>tr|B0UYK4|B0UYK4_DANRE Novel protein similar to vertebrate kinesin family member 5A (KIF5		2	1	0	0	0	0	0	0	1	1	0	1	2	1	0	0	0	0	0	0	1	0	0	0	0				0	0	0	0	0	0	0	0	0	0	195890	0	0	0	0	0	0	0
702	F1R5W5;F1QA91	>tr|F1R5W5|F1R5W5_DANRE Uncharacterized protein (Fragment) OS=Danio rerio GN=sfxn1 PE=4 SV=1;>tr|F1QA91|F1QA91_DANRE Uncharacterized protein OS=Danio rerio GN=sfxn1 PE=4 SV=1		2	2	2	1	2	0	2	1	0	0	1	0	0	1	0	0	0	0	0	0	0	0	0	0	0				2019700	0	961110	0	657330	0	0	0	0	0	0	0	0	0	0	0	0	0
1070	F1R6C4;F1R1P1	>tr|F1R6C4|F1R6C4_DANRE Uncharacterized protein OS=Danio rerio GN=zgc:136346 PE=4 SV=1;>tr|F1R1P1|F1R1P1_DANRE Uncharacterized protein OS=Danio rerio GN=zgc:136346 PE=4 SV=1		2	2	0	0	0	0	1	0	2	1	2	2	2	2	1	1	0	0	0	0	0	0	1	0	0				0	0	0	0	0	0	777250	0	419090	526260	464930	327580	0	0	0	0	0	0
1081	F1R741	>tr|F1R741|F1R741_DANRE Uncharacterized protein OS=Danio rerio GN=tgfb1a PE=3 SV=1		2	1	0	0	1	1	1	2	1	1	1	2	2	2	1	1	2	1	2	2	2	2	2	2	1				0	0	0	0	0	0	0	0	0	0	0	0	0	0	0	0	0	0
1483	F1R742;Q6PE45	>tr|F1R742|F1R742_DANRE Uncharacterized protein OS=Danio rerio GN=rer1 PE=4 SV=1;>tr|Q6PE45|Q6PE45_DANRE RER1 homolog OS=Danio rerio GN=rer1 PE=2 SV=1		2	2	1	1	1	1	1	0	0	2	2	0	1	1	0	0	0	0	0	0	0	0	0	0	0				0	0	0	0	0	0	0	0	186680	0	0	0	0	0	0	0	0	0
1692	REV__F1R7N8;REV__F1QZQ0;REV__F1QVM7;REV__B0S758	>tr|F1R7N8|F1R7N8_DANRE Uncharacterized protein OS=Danio rerio GN=ttna PE=4 SV=1;>tr|F1QZQ0|F1QZQ0_DANRE Uncharacterized protein (Fragment) OS=Danio rerio GN=ttna PE=4 SV=1;>tr|F1QVM7|F1QVM7_DANRE Uncharacterized protein (Fragment) OS=Danio rerio GN=ttna P		2	2	0	0	1	0	1	0	2	2	0	0	0	0	1	1	1	0	0	1	1	0	1	1	0		+		0	0	0	0	0	0	0	347750	0	0	0	0	0	0	0	0	0	0
1090	F1R7T7	>tr|F1R7T7|F1R7T7_DANRE Uncharacterized protein (Fragment) OS=Danio rerio GN=CU856378.1 PE=4 SV=1		2	2	0	0	0	2	2	2	1	1	1	2	2	2	2	2	0	1	0	2	1	2	1	0	0				0	0	0	0	0	111950	0	0	0	935600	0	0	796070	0	0	0	0	0
1097	F1R8J6;F1R2C5	>tr|F1R8J6|F1R8J6_DANRE Uncharacterized protein OS=Danio rerio GN=ppt1 PE=4 SV=1;>tr|F1R2C5|F1R2C5_DANRE Uncharacterized protein (Fragment) OS=Danio rerio GN=ppt1 PE=4 SV=1		2	2	0	0	2	0	0	1	1	1	1	1	1	1	2	2	0	0	1	1	1	0	0	1	2				0	0	0	0	0	0	0	0	0	0	0	0	0	0	0	0	0	0
1099	F1R8M5	>tr|F1R8M5|F1R8M5_DANRE Uncharacterized protein (Fragment) OS=Danio rerio GN=FP102071.1 PE=4 SV=1		2	1	0	0	0	0	0	0	0	0	0	0	0	0	0	0	0	1	1	0	1	1	2	1	2				0	0	0	0	0	0	0	0	0	0	0	0	0	0	0	0	0	0
1100	F1R8M7	>tr|F1R8M7|F1R8M7_DANRE Uncharacterized protein OS=Danio rerio GN=tgfb2 PE=3 SV=1		2	2	0	0	0	2	2	2	2	1	1	2	2	2	2	2	1	2	1	2	1	2	0	1	1				0	0	0	345630	242140	414740	182670	0	0	0	180930	231320	0	235840	0	182270	0	153680
1111	F1R9D2	>tr|F1R9D2|F1R9D2_DANRE Uncharacterized protein OS=Danio rerio GN=pmela PE=4 SV=1		2	2	2	2	2	0	1	0	0	0	0	0	0	0	0	0	0	0	0	0	0	0	0	1	1				1384800	1155200	1078100	0	0	0	0	0	0	0	0	0	0	0	0	0	0	0
1032	F1RC50;F1R2X2	>tr|F1RC50|F1RC50_DANRE Uncharacterized protein (Fragment) OS=Danio rerio GN=arsh PE=4 SV=1;>tr|F1R2X2|F1R2X2_DANRE Uncharacterized protein (Fragment) OS=Danio rerio GN=arsh PE=4 SV=1		2	2	2	2	2	2	2	1	1	2	2	1	2	0	2	1	0	0	0	0	0	0	1	1	0				764480	699850	1009400	97843	100890	0	0	169560	143670	0	121460	0	46517	0	0	0	0	0
1141	F1RCW3	>tr|F1RCW3|F1RCW3_DANRE Uncharacterized protein OS=Danio rerio GN=CU694654.1 PE=4 SV=1		2	2	1	1	0	1	1	1	0	0	1	1	1	1	0	0	1	1	1	0	1	1	1	1	0				0	0	0	0	0	0	0	0	0	0	0	0	0	0	0	0	0	0
1147	F1RDS7	>tr|F1RDS7|F1RDS7_DANRE Uncharacterized protein (Fragment) OS=Danio rerio GN=si:dkey-27a13.3 PE=4 SV=1		2	1	0	0	0	1	2	2	0	0	0	2	2	2	0	2	1	1	0	2	1	2	0	1	1				0	0	0	0	0	0	0	0	0	0	0	0	0	0	0	0	0	0
205	F1RDV2;B0UYL0	>tr|F1RDV2|F1RDV2_DANRE Uncharacterized protein OS=Danio rerio GN=ndufa10 PE=4 SV=1;>tr|B0UYL0|B0UYL0_DANRE NADH dehydrogenase (Ubiquinone) 1 alpha subcomplex, 10 OS=Danio rerio GN=ndufa10 PE=4 SV=1		2	2	1	0	0	1	1	2	1	2	1	1	2	2	0	1	1	2	1	0	0	0	1	1	0				0	0	0	0	0	127160	0	520070	0	0	117390	184780	0	0	0	293580	0	0
274	F1RDW6;B8A615	>tr|F1RDW6|F1RDW6_DANRE Uncharacterized protein (Fragment) OS=Danio rerio GN=si:dkey-33c12.3 PE=3 SV=1;>tr|B8A615|B8A615_DANRE Novel intermediate filament protein OS=Danio rerio GN=si:dkey-33c12.3 PE=3 SV=1		2	1	1	2	0	1	1	1	1	1	0	1	1	1	1	1	1	0	0	0	0	0	0	0	0				0	695970	0	0	0	0	0	0	0	0	0	0	0	0	0	0	0	0
306	F1RDY3;B8JLT7	>tr|F1RDY3|F1RDY3_DANRE Uncharacterized protein OS=Danio rerio GN=zgc:91963 PE=4 SV=1;>tr|B8JLT7|B8JLT7_DANRE Novel protein similar to H.sapiens HTRA3, HtrA serine peptidase 3 (HTRA3, zgc:91963) (Fragment) OS=Danio rerio GN=CH1073-501A1.1 PE=4 SV=1		2	1	0	1	0	2	1	2	2	1	1	1	1	2	1	1	1	1	0	2	1	1	2	0	1				0	0	0	0	0	0	0	0	0	0	0	0	0	0	0	0	0	0
1151	F1RE17	>tr|F1RE17|F1RE17_DANRE Uncharacterized protein OS=Danio rerio GN=acad11 PE=3 SV=1		2	2	1	1	1	2	2	2	1	1	1	0	0	0	0	0	0	0	0	0	0	0	0	0	0				0	0	0	0	276970	262360	0	0	0	0	0	0	0	0	0	0	0	0
1157	F1REI7	>tr|F1REI7|F1REI7_DANRE Uncharacterized protein OS=Danio rerio GN=zgc:153027 PE=4 SV=1		2	2	1	1	1	0	0	0	0	0	0	0	0	0	0	0	0	1	0	2	2	2	0	0	0				0	0	0	0	0	0	0	0	0	0	0	0	0	0	0	0	0	3433300
1158	F1REJ8	>tr|F1REJ8|F1REJ8_DANRE Uncharacterized protein OS=Danio rerio GN=thbs4a PE=4 SV=1		2	1	0	0	0	1	0	1	0	0	0	1	1	1	1	0	1	1	0	1	1	1	2	2	1				0	0	0	0	0	0	0	0	0	0	0	0	0	0	0	0	0	0
1161	F1REP9;Q561Z7;Q8AV83	>tr|F1REP9|F1REP9_DANRE Uncharacterized protein (Fragment) OS=Danio rerio GN=try PE=3 SV=1;>tr|Q561Z7|Q561Z7_DANRE Try protein OS=Danio rerio GN=try PE=2 SV=1;>tr|Q8AV83|Q8AV83_DANRE Trypsin OS=Danio rerio GN=try PE=2 SV=1		2	2	1	2	2	2	2	2	0	0	0	1	1	0	0	1	0	1	0	2	0	2	0	0	0				0	296990	281580	1242600	861250	541650	0	0	0	0	0	0	0	0	0	0	0	203440
756	F2Z4T0;F1QDX1	>tr|F2Z4T0|F2Z4T0_DANRE Uncharacterized protein OS=Danio rerio GN=si:dkey-250m6.8 PE=4 SV=1;>tr|F1QDX1|F1QDX1_DANRE Uncharacterized protein OS=Danio rerio GN=si:dkey-250m6.8 PE=4 SV=1		2	2	0	1	0	2	1	2	0	0	0	1	1	1	1	1	1	1	1	1	1	1	1	1	1				0	0	0	0	0	637870	0	0	0	0	0	0	0	0	0	0	0	0
1166	F2Z4T7	>tr|F2Z4T7|F2Z4T7_DANRE Uncharacterized protein OS=Danio rerio GN=lman2lb PE=4 SV=1		2	2	1	1	1	2	2	1	2	1	2	1	2	2	0	0	0	0	0	0	0	0	0	0	0				0	0	0	0	104380	0	0	0	118050	0	0	0	0	0	0	0	0	0
1180	Q08C78;Q6PC91	>tr|Q08C78|Q08C78_DANRE Basic transcription factor 3 OS=Danio rerio GN=btf3 PE=2 SV=1;>sp|Q6PC91|BT3L4_DANRE Transcription factor BTF3 homolog 4 OS=Danio rerio GN=btf3l4 PE=2 SV=1		2	2	1	1	0	2	2	0	1	0	1	2	2	2	0	1	1	1	1	1	1	1	1	0	1				0	0	0	378530	1008100	0	0	0	0	393330	255530	316610	0	0	0	0	0	0
1190	Q1L8M3	>tr|Q1L8M3|Q1L8M3_DANRE Novel protein OS=Danio rerio GN=fgf23 PE=4 SV=2		2	2	1	1	2	0	0	0	1	2	2	1	0	0	2	1	2	2	2	1	2	1	2	2	1				0	0	286530	0	0	0	0	218650	178490	0	0	0	377710	0	642920	1649100	1690200	0
1193	Q1L8R2	>tr|Q1L8R2|Q1L8R2_DANRE Splicing factor proline/glutamine rich (Polypyrimidine tract binding protein associated) OS=Danio rerio GN=sfpq PE=2 SV=1		2	2	0	0	0	0	0	0	0	0	0	0	1	0	0	0	0	0	0	1	0	0	0	0	0				0	0	0	0	0	0	0	0	0	0	0	0	0	0	0	0	0	0
1195	Q1L960;Q6DH11	>tr|Q1L960|Q1L960_DANRE Novel protein (Zgc:92693) OS=Danio rerio GN=lim2.4 PE=4 SV=1;>tr|Q6DH11|Q6DH11_DANRE Lens intrinsic membrane protein 2.4 OS=Danio rerio GN=lim2.4 PE=2 SV=1		2	2	2	2	1	0	0	0	0	0	0	0	0	0	0	0	0	0	0	0	0	0	0	0	0				9348300	6066900	0	0	0	0	0	0	0	0	0	0	0	0	0	0	0	0
1203	Q1LVA8	>tr|Q1LVA8|Q1LVA8_DANRE Novel protein similar to vertebrate acyl-CoA synthetase long-chain family member 3 (ACSL3) OS=Danio rerio GN=acsl3a PE=4 SV=1		2	1	2	2	2	1	1	1	0	1	1	0	0	1	0	0	0	0	0	0	0	0	0	0	0				0	0	54423	0	0	0	0	0	0	0	0	0	0	0	0	0	0	0
1206	Q1LVH3;Q1LVH2;F1R8Z4	>tr|Q1LVH3|Q1LVH3_DANRE Basigin OS=Danio rerio GN=bsg PE=2 SV=1;>tr|Q1LVH2|Q1LVH2_DANRE Basigin OS=Danio rerio GN=bsg PE=2 SV=1;>tr|F1R8Z4|F1R8Z4_DANRE Uncharacterized protein (Fragment) OS=Danio rerio GN=bsg PE=4 SV=1		2	2	2	2	1	0	1	0	0	0	0	1	0	0	0	1	0	0	0	0	0	0	0	0	1				0	1874700	0	0	0	0	0	0	0	0	0	0	0	0	0	0	0	0
1213	Q1LX40;Q1LX41	>tr|Q1LX40|Q1LX40_DANRE Novel protein similar to vertebrate copine family OS=Danio rerio GN=cpne2 PE=2 SV=1;>tr|Q1LX41|Q1LX41_DANRE Novel protein similar to vertebrate copine family (Fragment) OS=Danio rerio GN=cpne2 PE=2 SV=1		2	1	2	2	2	1	1	1	1	1	2	1	0	1	1	1	1	1	0	0	0	0	2	1	0				0	0	0	0	0	0	0	0	0	0	0	0	0	0	0	0	0	0
1227	Q1MTE3;Q7ZSY3	>tr|Q1MTE3|Q1MTE3_DANRE SWI/SNF related, matrix associated, actin dependent regulator of chromatin, subfamily a, member 2 OS=Danio rerio GN=smarca2 PE=2 SV=1;>tr|Q7ZSY3|Q7ZSY3_DANRE Brahma protein-like protein 1 OS=Danio rerio GN=smarca4 PE=2 SV=1		2	2	0	0	1	1	0	0	2	1	1	0	0	0	1	2	0	1	0	1	0	1	0	0	0				0	0	0	0	0	0	189710	0	0	0	0	0	0	373880	0	0	0	0
1234	Q24JW2	>tr|Q24JW2|Q24JW2_DANRE Lysozyme C OS=Danio rerio GN=lyz PE=2 SV=1		2	2	1	0	1	2	2	2	1	2	1	2	2	2	0	1	2	2	1	2	0	2	2	0	1				0	0	0	153460	113910	501710	0	748240	0	137280	175780	117840	0	0	266420	1030100	0	756460
1236	Q285P3	>tr|Q285P3|Q285P3_DANRE Facilitated glucose transporter 1 OS=Danio rerio GN=slc2a1a PE=2 SV=1		2	2	2	2	2	0	0	0	0	0	0	0	0	0	0	0	0	0	0	0	0	0	0	0	0				565100	732540	815130	0	0	0	0	0	0	0	0	0	0	0	0	0	0	0
1054	Q2PMI4;F1R4P5	>tr|Q2PMI4|Q2PMI4_DANRE Follistatin 2 OS=Danio rerio GN=fstb PE=2 SV=1;>tr|F1R4P5|F1R4P5_DANRE Uncharacterized protein OS=Danio rerio GN=fstb PE=4 SV=1		2	2	0	0	0	1	1	1	0	0	1	2	2	0	2	2	0	1	2	2	1	2	1	1	2				0	0	0	0	0	0	0	0	0	0	0	0	0	0	0	0	0	145770
1241	Q3B750	>tr|Q3B750|Q3B750_DANRE Uncharacterized protein OS=Danio rerio GN=uqcrh PE=2 SV=1		2	2	1	0	1	1	1	1	2	1	1	1	1	1	1	1	0	1	1	0	1	1	1	1	1				0	0	0	0	0	0	0	0	0	0	0	0	0	0	0	0	0	0
1245	Q498W6;Q5RH31	>tr|Q498W6|Q498W6_DANRE Uncharacterized protein OS=Danio rerio GN=ndufa12 PE=2 SV=1;>tr|Q5RH31|Q5RH31_DANRE Novel protein similar to vertebrate 13kDa differentiation-associated protein (DAP13) OS=Danio rerio GN=ndufa12 PE=2 SV=1		2	2	0	0	0	1	0	1	0	1	0	0	0	1	0	0	0	1	0	0	0	0	1	1	0				0	0	0	0	0	0	0	0	0	0	0	0	0	0	0	0	0	0
1255	Q4VBI5	>tr|Q4VBI5|Q4VBI5_DANRE NADH dehydrogenase [ubiquinone] 1 alpha subcomplex subunit 2 OS=Danio rerio GN=NDUFA2 PE=2 SV=1		2	2	0	0	0	0	0	1	0	0	0	0	0	0	0	0	0	0	0	0	0	0	2	1	1				0	0	0	0	0	0	0	0	0	0	0	0	0	0	0	0	0	0
1266	Q503Y1	>tr|Q503Y1|Q503Y1_DANRE Glutathione peroxidase OS=Danio rerio GN=gpx4b PE=2 SV=1		2	2	2	1	2	1	1	1	1	0	1	0	0	1	0	0	0	1	0	0	0	0	0	0	0				847760	0	1393600	0	0	0	0	0	0	0	0	0	0	0	0	0	0	0
1270	Q52WY2;Q7ZUQ1	>tr|Q52WY2|Q52WY2_DANRE Ras-like protein Cdc42a OS=Danio rerio GN=cdc42 PE=2 SV=1;>tr|Q7ZUQ1|Q7ZUQ1_DANRE Cdc42l protein OS=Danio rerio GN=cdc42l PE=2 SV=1		2	1	0	2	2	1	1	2	0	2	2	1	1	1	1	1	0	0	0	0	0	0	0	1	0				0	0	0	0	0	0	0	0	915710	0	0	0	0	0	0	0	0	0
1279	Q5BJA1	>tr|Q5BJA1|Q5BJA1_DANRE Uncharacterized protein OS=Danio rerio GN=RPS17 PE=2 SV=1		2	2	2	2	2	2	2	2	1	2	2	2	2	2	1	2	0	0	0	0	0	0	0	0	0				1565700	1143200	1240800	765990	1878300	532970	0	1518300	1436600	1423400	1211200	1183300	0	786350	0	0	0	0
1105	Q5BKX3;F1R902;F1QCL4;E9QB34	>tr|Q5BKX3|Q5BKX3_DANRE Lysosomal membrane glycoprotein 2 OS=Danio rerio GN=lamp2 PE=2 SV=1;>tr|F1R902|F1R902_DANRE Uncharacterized protein (Fragment) OS=Danio rerio GN=lamp2 PE=4 SV=1;>tr|F1QCL4|F1QCL4_DANRE Uncharacterized protein (Fragment) OS=Danio rer		2	2	1	1	1	1	1	1	1	1	0	1	1	2	0	0	0	0	0	0	0	0	0	0	0				0	0	0	0	0	0	0	0	0	0	0	88823	0	0	0	0	0	0
1296	Q5RGQ4	>tr|Q5RGQ4|Q5RGQ4_DANRE Novel protein similar to vertebrate ryanodine receptor 3 (RYR3) (Fragment) OS=Danio rerio GN=ryr3 PE=4 SV=1		2	2	0	0	0	2	2	2	0	1	0	1	1	1	1	0	0	1	0	0	0	1	0	0	0				0	0	0	0	0	140070	0	0	0	0	0	0	0	0	0	0	0	0
2	Q5RGZ4;F1QCB4;A0ELQ2;B0S5H3;F1R2R5;F1QBG4;F1R9C4;B0S5H1;B2CZC0;F1RC03;F1R8H7	>tr|Q5RGZ4|Q5RGZ4_DANRE ATPase, Ca++ transporting, plasma membrane 1a OS=Danio rerio GN=atp2b1a PE=2 SV=1;>tr|F1QCB4|F1QCB4_DANRE Uncharacterized protein (Fragment) OS=Danio rerio GN=atp2b1a PE=3 SV=1;>tr|A0ELQ2|A0ELQ2_DANRE Plasma membrane calcium ATPase		2	1	1	0	2	0	1	0	2	2	2	1	1	1	2	2	1	1	0	0	1	1	0	0	0				0	0	0	0	0	0	0	0	0	0	0	0	0	60851	0	0	0	0
1299	Q5RHQ4	>tr|Q5RHQ4|Q5RHQ4_DANRE Novel protein similar to CGI-49 protein (CGI-49) OS=Danio rerio GN=sccpdhb PE=2 SV=1		2	2	1	1	1	0	2	1	0	1	1	1	1	1	0	0	0	1	0	0	0	0	1	1	0				0	0	0	0	265120	0	0	0	0	0	0	0	0	0	0	0	0	0
1306	Q5RKP9;B0S554;B3DI16;B8JLJ7;E9QIX5;F1QDR7	>tr|Q5RKP9|Q5RKP9_DANRE Uncharacterized protein OS=Danio rerio GN=GNA11 (1 of 2) PE=2 SV=1;>tr|B0S554|B0S554_DANRE Novel protein similar to H.sapiens GNA14, guanine nucleotide binding protein (G protein), alpha 14 (GNA14) OS=Danio rerio GN=gna14a PE=4 SV=2		2	2	2	2	2	2	2	2	1	2	1	1	1	1	0	0	0	2	0	0	0	0	0	0	0				571240	1311200	872170	218740	228620	151860	0	265680	0	0	0	0	0	0	0	99897	0	0
1315	Q5U3A3;Q6DC92;Q7T383;F1R999	>tr|Q5U3A3|Q5U3A3_DANRE Novel protein similar to v-ral simian leukemia viral oncogene homolog A (Ras related) (Rala, zgc:92116) OS=Danio rerio GN=CH211-202I17.1 PE=2 SV=1;>tr|Q6DC92|Q6DC92_DANRE Novel protein (Zgc:100801) OS=Danio rerio GN=ralba PE=2 SV=1;		2	2	2	2	2	2	2	1	1	2	2	1	2	2	0	0	0	1	0	0	0	0	1	1	1				152580	154390	151810	152500	139570	0	0	111320	132030	0	84786	65587	0	0	0	0	0	0
1320	Q5U3U8	>tr|Q5U3U8|Q5U3U8_DANRE Uncharacterized protein OS=Danio rerio GN=GNB4 (1 of 2) PE=2 SV=1		2	1	2	2	2	2	2	2	0	1	0	0	0	1	0	0	0	1	0	0	1	1	0	1	0				0	0	0	0	0	0	0	0	0	0	0	0	0	0	0	0	0	0
1340	Q6AZA2	>tr|Q6AZA2|Q6AZA2_DANRE NADH dehydrogenase (Ubiquinone) flavoprotein 1 OS=Danio rerio GN=ndufv1 PE=2 SV=1		2	2	1	1	0	1	2	1	1	1	2	1	1	1	0	0	0	1	1	0	1	0	2	1	1				0	0	0	0	39491	0	0	0	65153	0	0	0	0	0	0	0	0	0
1343	Q6AZC1	>tr|Q6AZC1|Q6AZC1_DANRE Proteasome (Prosome, macropain) 26S subunit, ATPase, 5 OS=Danio rerio GN=psmc5 PE=2 SV=1		2	2	1	0	0	0	0	0	2	2	1	2	2	2	2	0	0	0	0	0	0	0	1	0	1				0	0	0	0	0	0	81421	168200	0	0	227360	190280	0	0	0	0	0	0
1347	Q6DEI0	>tr|Q6DEI0|Q6DEI0_DANRE Uncharacterized protein OS=Danio rerio GN=pltp PE=2 SV=1		2	2	0	1	0	1	1	0	0	1	1	1	0	0	2	2	2	2	0	2	2	2	2	2	2				0	0	0	0	0	0	0	0	0	0	0	0	428840	290080	0	0	0	0
1356	Q6DGJ8	>tr|Q6DGJ8|Q6DGJ8_DANRE Surfeit gene 4, like OS=Danio rerio GN=surf4l PE=2 SV=1		2	1	2	2	2	2	2	2	2	2	2	2	2	2	2	2	0	2	0	0	2	0	2	1	1				9703300	2705700	11895000	1100000	1292800	1145300	711260	2155800	2054200	243940	654990	747420	939400	847420	0	41498	0	0
1357	Q6DGL9	>tr|Q6DGL9|Q6DGL9_DANRE Ribosomal protein L38 OS=Danio rerio GN=rpl38 PE=2 SV=1		2	2	2	2	2	2	2	2	2	2	2	2	2	2	2	1	1	1	0	1	1	1	2	1	1				156620	202040	211120	1628200	1163300	629930	780470	629310	506910	331030	285430	951870	163080	0	0	0	0	0
[truncated: 409 more rows]
[truncated: 29 more columns]

## Sheet: Supplemental Table S2 
Supplemental Table S2. Original "peptides" table as obtained from the MaxQuant software
[truncated: 10,248 more rows]
[truncated: 65 more columns]

## Sheet: Supplemental Table S3
Supplemental Table S3. Identified Extracellular proteins. GO annotations obtained by STRAP analysis on zebrafish proteins and human orthologue proteins						Strap Analysis Extracellular Matrix Proteins
[truncated: 264 more rows]

[truncated: 5 more sheets: Supplemental Table S4, Supplemental Table S5, References for Supp Table S5, Supplemental Table S6, Sample Names]
